# Supplementary material for: Single-cell RNA sequencing shows the immune cell landscape in the kidneys of patients with idiopathic membranous nephropathy
Source: Front Immunol. 2023 Sep 4;14:1203062. doi: 10.3389/fimmu.2023.1203062 (PMC10507359; doi:10.3389/fimmu.2023.1203062)
Supplement: Supplementary file 3 [file Table_3.xlsx]

## Sheet: Pod
	ONTOLOGY	ID	Description	GeneRatio	BgRatio	pvalue	p.adjust	qvalue	geneID	Count
GO:0006397	BP	GO:0006397	mRNA processing	39/554	500/18800	3.52147e-08	0.000160685	0.000138968	ZFP36L1/HNRNPH1/SRSF6/WTAP/TRA2B/LUC7L/SCAF11/DDX17/NOVA1/RBM26/REST/MBNL1/XRN2/SYF2/GRSF1/SFPQ/TENT2/CPEB3/RPRD1A/WBP4/SON/THOC2/WBP11/NCL/PRPF6/DDX39B/SRSF3/TRA2A/TSEN15/RNPC3/CWC27/SMU1/CPSF6/PRPF39/CWC25/CRNKL1/SNRPB2/CNOT6L/NCBP3	39
GO:0030111	BP	GO:0030111	regulation of Wnt signaling pathway	30/554	336/18800	7.61357e-08	0.000173704	0.000150228	CTNNB1/BICC1/TBL1XR1/EGR1/CAV1/CDH2/CSNK2A1/IGFBP4/SPIN1/SOX9/NFKB1/GPC3/SOX4/TCF7L2/VPS35/TLE5/G3BP1/USP34/TNKS/WNK1/LATS2/XIAP/PLPP3/GSK3B/TNKS2/KPNA1/TNFAIP3/TSKU/DIXDC1/FOXO1	30
GO:0016055	BP	GO:0016055	Wnt signaling pathway	35/554	452/18800	2.14462e-07	0.000271907	0.000235159	CTNNB1/BICC1/TBL1XR1/EGR1/CAV1/CDC42/CDH2/CSNK2A1/IGFBP4/SPIN1/SOX9/NFKB1/GPC3/SOX4/TCF7L2/VPS35/TLE5/G3BP1/GPC4/USP34/TNKS/WNK1/LATS2/TNIK/CD24/XIAP/PLPP3/GSK3B/TNKS2/KPNA1/TNFAIP3/MARK2/TSKU/DIXDC1/FOXO1	35
GO:0198738	BP	GO:0198738	cell-cell signaling by wnt	35/554	454/18800	2.38358e-07	0.000271907	0.000235159	CTNNB1/BICC1/TBL1XR1/EGR1/CAV1/CDC42/CDH2/CSNK2A1/IGFBP4/SPIN1/SOX9/NFKB1/GPC3/SOX4/TCF7L2/VPS35/TLE5/G3BP1/GPC4/USP34/TNKS/WNK1/LATS2/TNIK/CD24/XIAP/PLPP3/GSK3B/TNKS2/KPNA1/TNFAIP3/MARK2/TSKU/DIXDC1/FOXO1	35
GO:0072182	BP	GO:0072182	regulation of nephron tubule epithelial cell differentiation	6/554	12/18800	5.06362e-07	0.000385088	0.000333044	CTNNB1/PAX8/PAX2/STAT1/CD24/LHX1	6
GO:0072497	BP	GO:0072497	mesenchymal stem cell differentiation	6/554	12/18800	5.06362e-07	0.000385088	0.000333044	CTNNB1/SOX9/SLC4A11/REST/SOX6/GSK3B	6
GO:0060828	BP	GO:0060828	regulation of canonical Wnt signaling pathway	24/554	261/18800	9.06842e-07	0.000560112	0.000484413	CTNNB1/BICC1/TBL1XR1/EGR1/CAV1/CDH2/IGFBP4/SOX9/NFKB1/GPC3/SOX4/TCF7L2/VPS35/TLE5/G3BP1/USP34/TNKS/WNK1/LATS2/XIAP/GSK3B/TNKS2/KPNA1/FOXO1	24
GO:0000377	BP	GO:0000377	RNA splicing, via transesterification reactions with bulged adenosine as nucleophile	27/554	321/18800	1.10476e-06	0.000560112	0.000484413	HNRNPH1/SRSF6/WTAP/TRA2B/LUC7L/SCAF11/DDX17/NOVA1/REST/MBNL1/SYF2/SFPQ/WBP4/SON/WBP11/NCL/PRPF6/DDX39B/SRSF3/TRA2A/RNPC3/CWC27/SMU1/PRPF39/CWC25/CRNKL1/SNRPB2	27
GO:0000398	BP	GO:0000398	mRNA splicing, via spliceosome	27/554	321/18800	1.10476e-06	0.000560112	0.000484413	HNRNPH1/SRSF6/WTAP/TRA2B/LUC7L/SCAF11/DDX17/NOVA1/REST/MBNL1/SYF2/SFPQ/WBP4/SON/WBP11/NCL/PRPF6/DDX39B/SRSF3/TRA2A/RNPC3/CWC27/SMU1/PRPF39/CWC25/CRNKL1/SNRPB2	27
GO:0000375	BP	GO:0000375	RNA splicing, via transesterification reactions	27/554	325/18800	1.4027e-06	0.000640053	0.00055355	HNRNPH1/SRSF6/WTAP/TRA2B/LUC7L/SCAF11/DDX17/NOVA1/REST/MBNL1/SYF2/SFPQ/WBP4/SON/WBP11/NCL/PRPF6/DDX39B/SRSF3/TRA2A/RNPC3/CWC27/SMU1/PRPF39/CWC25/CRNKL1/SNRPB2	27
GO:0072160	BP	GO:0072160	nephron tubule epithelial cell differentiation	6/554	14/18800	1.5647e-06	0.000649067	0.000561346	CTNNB1/PAX8/PAX2/STAT1/CD24/LHX1	6
GO:2000736	BP	GO:2000736	regulation of stem cell differentiation	11/554	62/18800	1.71588e-06	0.000652465	0.000564285	N4BP2L2/LBH/JAG1/ZFP36L2/SOX9/SLC4A11/REST/NELFB/PTN/SOX6/GSK3B	11
GO:0072001	BP	GO:0072001	renal system development	26/554	312/18800	2.07418e-06	0.000717322	0.000620377	CTNNB1/NFIA/BICC1/ADAMTS1/EGR1/COL4A1/PAX8/PAX2/LRP2/SDC4/JAG1/SOX9/IQGAP1/STAT1/PBX1/GPC3/SOX4/PDGFA/RRM2B/AKR1B1/CD24/EMX2/AP2B1/NIPBL/GFRA1/LHX1	26
GO:0060070	BP	GO:0060070	canonical Wnt signaling pathway	26/554	313/18800	2.20086e-06	0.000717322	0.000620377	CTNNB1/BICC1/TBL1XR1/EGR1/CAV1/CDH2/IGFBP4/SOX9/NFKB1/GPC3/SOX4/TCF7L2/VPS35/TLE5/G3BP1/USP34/TNKS/WNK1/LATS2/XIAP/PLPP3/GSK3B/TNKS2/KPNA1/DIXDC1/FOXO1	26
GO:0008380	BP	GO:0008380	RNA splicing	32/554	438/18800	2.50009e-06	0.000760527	0.000657743	HNRNPH1/SRSF6/WTAP/PPIG/TRA2B/LUC7L/SCAF11/DDX17/NOVA1/RBM12B/REST/MBNL1/SYF2/GRSF1/SFPQ/WBP4/SON/THOC2/WBP11/NCL/PRPF6/DDX39B/SRSF3/TRA2A/TSEN15/RNPC3/CWC27/SMU1/PRPF39/CWC25/CRNKL1/SNRPB2	32
GO:2000696	BP	GO:2000696	regulation of epithelial cell differentiation involved in kidney development	6/554	16/18800	3.96744e-06	0.00111569	0.000964907	CTNNB1/PAX8/PAX2/STAT1/CD24/LHX1	6
GO:2000737	BP	GO:2000737	negative regulation of stem cell differentiation	7/554	24/18800	4.15664e-06	0.00111569	0.000964907	N4BP2L2/LBH/JAG1/ZFP36L2/REST/NELFB/GSK3B	7
GO:0001655	BP	GO:0001655	urogenital system development	27/554	352/18800	6.29288e-06	0.00159525	0.00137965	CTNNB1/NFIA/BICC1/ADAMTS1/EGR1/COL4A1/PAX8/CRIP1/PAX2/LRP2/SDC4/JAG1/SOX9/IQGAP1/STAT1/PBX1/GPC3/SOX4/PDGFA/RRM2B/AKR1B1/CD24/EMX2/AP2B1/NIPBL/GFRA1/LHX1	27
GO:0072077	BP	GO:0072077	renal vesicle morphogenesis	6/554	18/18800	8.74562e-06	0.00210033	0.00181647	CTNNB1/PAX8/PAX2/SOX9/STAT1/LHX1	6
GO:0072087	BP	GO:0072087	renal vesicle development	6/554	19/18800	1.24645e-05	0.00278895	0.00241203	CTNNB1/PAX8/PAX2/SOX9/STAT1/LHX1	6
GO:0007064	BP	GO:0007064	mitotic sister chromatid cohesion	7/554	28/18800	1.28354e-05	0.00278895	0.00241203	POGZ/RAD21/PDS5B/TNKS/PDS5A/NIPBL/RB1	7
GO:0050684	BP	GO:0050684	regulation of mRNA processing	15/554	139/18800	1.53669e-05	0.00318723	0.00275648	ZFP36L1/SRSF6/WTAP/TRA2B/DDX17/NOVA1/REST/MBNL1/CPEB3/SON/NCL/SRSF3/TRA2A/SMU1/CPSF6	15
GO:0046794	BP	GO:0046794	transport of virus	6/554	20/18800	1.73643e-05	0.00344493	0.00297936	CAV1/RNASEK/CAV2/NUP153/TPCN1/CLEC4M	6
GO:0045732	BP	GO:0045732	positive regulation of protein catabolic process	20/554	233/18800	2.0171e-05	0.003835	0.00331671	EZR/CAV1/CTSC/RNF19A/LRP2/HUWE1/CSNK2A1/RNF128/SOX9/GABARAP/SEC22B/GPC3/VPS35/CLU/ATP5IF1/GSK3B/RNF144B/RNF217/TNFAIP3/FOXO1	20
GO:0030177	BP	GO:0030177	positive regulation of Wnt signaling pathway	15/554	144/18800	2.34668e-05	0.00428316	0.0037043	TBL1XR1/CAV1/CSNK2A1/SPIN1/NFKB1/GPC3/SOX4/VPS35/USP34/TNKS/WNK1/XIAP/TNKS2/TNFAIP3/DIXDC1	15
GO:0050678	BP	GO:0050678	regulation of epithelial cell proliferation	27/554	382/18800	2.73037e-05	0.00479181	0.0041442	ZFP36L1/CTNNB1/CLDN1/NME2/SRSF6/NR2F2/THBS1/CAV1/CDC42/PAX2/CCL2/SOX9/STAT1/GPC3/TCF7L2/CAV2/PTPRK/SP1/PTN/NRP2/ATP5IF1/VEGFB/LAMB1/NEAT1/TNFAIP3/RB1/ROBO1	27
GO:0031589	BP	GO:0031589	cell-substrate adhesion	26/554	364/18800	3.20805e-05	0.00542161	0.00468889	VCAM1/CTNNB1/RIN2/THBS1/CDC42/CCN2/SDC4/JAG1/CCDC80/NID2/LIMS1/FN1/EDIL3/ITGA6/S100A10/ARHGAP6/EFNA1/PTPRK/MSLN/GSK3B/LAMB1/PTPRA/FAM107A/FER/AJUBA/MEGF9	26
GO:0099170	BP	GO:0099170	postsynaptic modulation of chemical synaptic transmission	5/554	14/18800	3.50379e-05	0.00561328	0.00485465	RNF19A/PPP3CA/CDH1/CYFIP1/NRGN	5
GO:0001822	BP	GO:0001822	kidney development	23/554	303/18800	3.5675e-05	0.00561328	0.00485465	CTNNB1/BICC1/ADAMTS1/EGR1/PAX8/PAX2/LRP2/SDC4/JAG1/SOX9/IQGAP1/STAT1/PBX1/GPC3/SOX4/PDGFA/RRM2B/AKR1B1/CD24/AP2B1/NIPBL/GFRA1/LHX1	23
GO:0048024	BP	GO:0048024	regulation of mRNA splicing, via spliceosome	12/554	103/18800	5.08019e-05	0.00735992	0.00636523	SRSF6/WTAP/TRA2B/DDX17/NOVA1/REST/MBNL1/SON/NCL/SRSF3/TRA2A/SMU1	12
GO:0072283	BP	GO:0072283	metanephric renal vesicle morphogenesis	5/554	15/18800	5.12854e-05	0.00735992	0.00636523	CTNNB1/PAX8/PAX2/STAT1/LHX1	5
GO:0043484	BP	GO:0043484	regulation of RNA splicing	15/554	154/18800	5.16146e-05	0.00735992	0.00636523	HNRNPH1/SRSF6/WTAP/TRA2B/DDX17/NOVA1/RBM12B/REST/MBNL1/GRSF1/SON/NCL/SRSF3/TRA2A/SMU1	15
GO:0048863	BP	GO:0048863	stem cell differentiation	18/554	211/18800	5.61859e-05	0.00755903	0.00653743	CTNNB1/N4BP2L2/CDC42/CDH2/LBH/PAX2/JAG1/ZFP36L2/SOX9/SLC4A11/REST/FN1/NELFB/PTN/NRP2/SOX6/GSK3B/SEMA6D	18
GO:0050673	BP	GO:0050673	epithelial cell proliferation	29/554	443/18800	5.63241e-05	0.00755903	0.00653743	ZFP36L1/CTNNB1/CLDN1/NME2/SRSF6/NR2F2/THBS1/CAV1/CDC42/PAX2/CCL2/IGFBP4/SOX9/STAT1/IGFBP5/GPC3/TCF7L2/CAV2/PTPRK/SP1/PTN/NRP2/ATP5IF1/VEGFB/LAMB1/NEAT1/TNFAIP3/RB1/ROBO1	29
GO:0001656	BP	GO:0001656	metanephros development	11/554	89/18800	6.01859e-05	0.00779954	0.00674544	CTNNB1/EGR1/PAX8/PAX2/SOX9/STAT1/GPC3/PDGFA/AKR1B1/NIPBL/LHX1	11
GO:0071560	BP	GO:0071560	cellular response to transforming growth factor beta stimulus	20/554	252/18800	6.15349e-05	0.00779954	0.00674544	ZFP36L1/CLDN1/THBS1/COL4A2/CAV1/ZFP36L2/SOX9/USP9Y/NREP/LIMS1/EP300/PDGFA/CAV2/TRIM33/PTPRK/COL1A2/LATS2/SOX6/HIPK2/CREBBP	20
GO:1903311	BP	GO:1903311	regulation of mRNA metabolic process	22/554	294/18800	6.49063e-05	0.00800453	0.00692272	ZFP36L1/SRSF6/WTAP/TRA2B/ZFP36L2/DDX17/NOVA1/MAPKAPK2/REST/MBNL1/SECISBP2/CPEB3/TNRC6A/SON/NCL/SRSF3/TRA2A/SERBP1/PUM2/SMU1/CPSF6/CNOT6L	22
GO:0072273	BP	GO:0072273	metanephric nephron morphogenesis	6/554	25/18800	6.99818e-05	0.00823917	0.00712566	CTNNB1/PAX8/PAX2/SOX9/STAT1/LHX1	6
GO:0035850	BP	GO:0035850	epithelial cell differentiation involved in kidney development	8/554	48/18800	7.21655e-05	0.00823917	0.00712566	CTNNB1/PAX8/PAX2/JAG1/IQGAP1/STAT1/CD24/LHX1	8
GO:0007160	BP	GO:0007160	cell-matrix adhesion	19/554	235/18800	7.29153e-05	0.00823917	0.00712566	VCAM1/CTNNB1/RIN2/THBS1/CCN2/SDC4/JAG1/NID2/LIMS1/FN1/ITGA6/S100A10/ARHGAP6/PTPRK/MSLN/GSK3B/PTPRA/FAM107A/AJUBA	19
GO:0007229	BP	GO:0007229	integrin-mediated signaling pathway	12/554	107/18800	7.40316e-05	0.00823917	0.00712566	NME2/ADAMTS1/CDC42/CCN2/LIMS1/FN1/ITGA6/ADAM10/PTN/PLPP3/PTPRA/SYK	12
GO:0090090	BP	GO:0090090	negative regulation of canonical Wnt signaling pathway	14/554	142/18800	7.98721e-05	0.00867753	0.00750477	CTNNB1/BICC1/EGR1/CAV1/CDH2/IGFBP4/SOX9/GPC3/TCF7L2/TLE5/G3BP1/LATS2/GSK3B/FOXO1	14
GO:0007044	BP	GO:0007044	cell-substrate junction assembly	11/554	92/18800	8.18215e-05	0.0086826	0.00750915	THBS1/SDC4/LIMS1/FN1/ITGA6/S100A10/ARHGAP6/PTPRK/PTPRA/FAM107A/AJUBA	11
GO:0071559	BP	GO:0071559	response to transforming growth factor beta	20/554	258/18800	8.52367e-05	0.00883943	0.0076448	ZFP36L1/CLDN1/THBS1/COL4A2/CAV1/ZFP36L2/SOX9/USP9Y/NREP/LIMS1/EP300/PDGFA/CAV2/TRIM33/PTPRK/COL1A2/LATS2/SOX6/HIPK2/CREBBP	20
GO:0007062	BP	GO:0007062	sister chromatid cohesion	9/554	63/18800	9.00636e-05	0.00913245	0.00789821	CTNNB1/POGZ/RAD21/PDS5B/SFPQ/TNKS/PDS5A/NIPBL/RB1	9
GO:0061326	BP	GO:0061326	renal tubule development	11/554	94/18800	9.96784e-05	0.00988766	0.00855136	CTNNB1/COL4A1/PAX8/PAX2/JAG1/SOX9/STAT1/PBX1/GPC3/CD24/LHX1	11
GO:0030858	BP	GO:0030858	positive regulation of epithelial cell differentiation	9/554	65/18800	0.000115463	0.0112097	0.00969474	CTNNB1/NME2/PLAAT4/PAX8/PAX2/SOX9/VEZF1/CD24/LHX1	9
GO:0042176	BP	GO:0042176	regulation of protein catabolic process	26/554	395/18800	0.000123672	0.0117566	0.0101677	EZR/CAV1/MDM4/CTSC/RNF19A/LRP2/HUWE1/CSNK2A1/RNF128/SOX9/GABARAP/SEC22B/GPC3/VPS35/CDH1/USP25/EFNA1/CLU/WAC/ATP5IF1/GSK3B/HIPK2/RNF144B/RNF217/TNFAIP3/FOXO1	26
GO:0072189	BP	GO:0072189	ureter development	5/554	18/18800	0.000135974	0.0126622	0.010951	NFIA/PAX2/SOX9/EMX2/LHX1	5
GO:0150115	BP	GO:0150115	cell-substrate junction organization	11/554	98/18800	0.000145525	0.0132806	0.0114857	THBS1/SDC4/LIMS1/FN1/ITGA6/S100A10/ARHGAP6/PTPRK/PTPRA/FAM107A/AJUBA	11
GO:0072210	BP	GO:0072210	metanephric nephron development	7/554	40/18800	0.000148781	0.0133115	0.0115125	CTNNB1/EGR1/PAX8/PAX2/SOX9/STAT1/LHX1	7
GO:0042063	BP	GO:0042063	gliogenesis	21/554	291/18800	0.000157094	0.013785	0.011922	CTNNB1/ADGRG6/CDH2/PAX2/NAB1/LRP2/CCL2/SOX9/B4GALT5/PRKCI/CD9/BMERB1/SOX4/CLU/PTN/IL6ST/SOX6/LAMB1/MAL/RELN/RNF10	21
GO:0031331	BP	GO:0031331	positive regulation of cellular catabolic process	28/554	449/18800	0.000171124	0.0147328	0.0127417	ZFP36L1/EZR/CAV1/CTSC/RNF19A/LRP2/ZFP36L2/RNF128/GABARAP/VPS35/GRSF1/TP53INP1/CPEB3/TNRC6A/CLU/WAC/ATP5IF1/SPTLC2/KCNQ1OT1/GSK3B/TRIM22/TPCN1/RNF144B/RNF217/TNFAIP3/FOXO1/RNF152/CNOT6L	28
GO:0050770	BP	GO:0050770	regulation of axonogenesis	14/554	154/18800	0.000190128	0.0160658	0.0138945	CDH2/IST1/FN1/EFNA1/CYFIP1/RUFY3/SIPA1L1/GSK3B/MARK2/DIXDC1/SEMA6D/MEGF8/ARHGAP35/ROBO1	14
GO:0043588	BP	GO:0043588	skin development	21/554	296/18800	0.000198604	0.0164769	0.0142501	ZFP36L1/CTNNB1/CLDN1/NME2/SRSF6/PLAAT4/UGCG/JAG1/SOX9/DSP/PALLD/FLG/IGFBP5/ITGA6/PDGFA/ARRDC3/COL1A2/KAZN/FOSL2/KLK5/CLIC4	21
GO:0030178	BP	GO:0030178	negative regulation of Wnt signaling pathway	15/554	174/18800	0.000204511	0.016664	0.0144119	CTNNB1/BICC1/EGR1/CAV1/CDH2/IGFBP4/SOX9/GPC3/TCF7L2/TLE5/G3BP1/LATS2/GSK3B/TSKU/FOXO1	15
GO:0043087	BP	GO:0043087	regulation of GTPase activity	24/554	364/18800	0.000217481	0.0174099	0.015057	ARHGAP29/RASGEF1B/CCL2/IQGAP1/LIMS1/RICTOR/NET1/AFDN/ITGA6/CAV2/S100A10/ARHGAP6/SIPA1L2/ASAP2/CPEB2/TBC1D9/WNK1/SIPA1L1/GSK3B/RGS4/SIPA1/AJUBA/CD40/ARHGAP35	24
GO:0030856	BP	GO:0030856	regulation of epithelial cell differentiation	14/554	157/18800	0.000232633	0.0179916	0.0155601	ZFP36L1/CTNNB1/NME2/SRSF6/CAV1/PLAAT4/PAX8/PAX2/JAG1/SOX9/STAT1/VEZF1/CD24/LHX1	14
GO:1903364	BP	GO:1903364	positive regulation of cellular protein catabolic process	14/554	157/18800	0.000232633	0.0179916	0.0155601	EZR/CAV1/CTSC/RNF19A/LRP2/RNF128/GABARAP/VPS35/CLU/ATP5IF1/GSK3B/RNF144B/RNF217/TNFAIP3	14
GO:0035019	BP	GO:0035019	somatic stem cell population maintenance	7/554	43/18800	0.00023826	0.0180643	0.0156229	PAX8/LBH/PAX2/ZFP36L2/SOX9/REST/SOX4	7
GO:0019827	BP	GO:0019827	stem cell population maintenance	13/554	139/18800	0.00024149	0.0180643	0.0156229	CTNNB1/PAX8/CDH2/LBH/PAX2/JAG1/ZFP36L2/SOX9/REST/SOX4/PTN/NIPBL/FOXO1	13
GO:1903362	BP	GO:1903362	regulation of cellular protein catabolic process	19/554	258/18800	0.000246529	0.0181438	0.0156917	EZR/CAV1/CTSC/RNF19A/LRP2/CSNK2A1/RNF128/GABARAP/VPS35/USP25/EFNA1/CLU/WAC/ATP5IF1/GSK3B/HIPK2/RNF144B/RNF217/TNFAIP3	19
GO:0016049	BP	GO:0016049	cell growth	29/554	484/18800	0.000258426	0.0186921	0.0161659	CTNNB1/CDC42/RPS6KA3/IST1/CSNK2A1/IGFBP4/SOX9/IQGAP1/IGFBP5/NET1/FN1/DCBLD2/ENPP1/CYFIP1/CXCL16/RUFY3/ADAM10/NRP2/SMARCA2/GSK3B/RGS4/FAM107A/SIPA1/KMT2D/RB1/SEMA6D/HNF4A/HDGFL2/MEGF8	29
GO:0070482	BP	GO:0070482	response to oxygen levels	22/554	324/18800	0.000262173	0.0186921	0.0161659	VCAM1/ZFP36L1/ATP1B1/THBS1/EGR1/CAV1/PDK3/MDM4/CCN2/GUCY1B1/EGLN1/REST/EP300/PDGFA/CPEB2/CD24/VEGFB/PLOD2/HIPK2/FOXO1/AJUBA/CREBBP	22
GO:0098727	BP	GO:0098727	maintenance of cell number	13/554	141/18800	0.00027802	0.019517	0.0168793	CTNNB1/PAX8/CDH2/LBH/PAX2/JAG1/ZFP36L2/SOX9/REST/SOX4/PTN/NIPBL/FOXO1	13
GO:0061005	BP	GO:0061005	cell differentiation involved in kidney development	8/554	58/18800	0.00028324	0.0195822	0.0169357	CTNNB1/PAX8/PAX2/JAG1/IQGAP1/STAT1/CD24/LHX1	8
GO:0007063	BP	GO:0007063	regulation of sister chromatid cohesion	5/554	21/18800	0.000300143	0.0201683	0.0174425	CTNNB1/RAD21/SFPQ/TNKS/RB1	5
GO:0003338	BP	GO:0003338	metanephros morphogenesis	6/554	32/18800	0.000300557	0.0201683	0.0174425	CTNNB1/PAX8/PAX2/SOX9/STAT1/LHX1	6
GO:0003337	BP	GO:0003337	mesenchymal to epithelial transition involved in metanephros morphogenesis	4/554	12/18800	0.000305788	0.0202219	0.0174889	CTNNB1/PAX8/PAX2/STAT1	4
GO:0001503	BP	GO:0001503	ossification	26/554	420/18800	0.000323891	0.0211131	0.0182596	CTNNB1/MGP/JUND/CCN2/NAB1/JAG1/VCAN/SOX9/PBX1/IGFBP5/SRGN/PAM16/GPC3/CEBPD/REST/JUNB/SGMS2/ENPP1/COL1A2/PTN/SP3/IL6ST/GSK3B/NIPBL/ZHX3/RUNX1	26
GO:0072080	BP	GO:0072080	nephron tubule development	10/554	91/18800	0.000343964	0.0221058	0.0191182	CTNNB1/PAX8/PAX2/JAG1/SOX9/STAT1/PBX1/GPC3/CD24/LHX1	10
GO:0000381	BP	GO:0000381	regulation of alternative mRNA splicing, via spliceosome	8/554	60/18800	0.000359115	0.0227589	0.0196831	SRSF6/WTAP/TRA2B/DDX17/NOVA1/REST/MBNL1/SMU1	8
GO:0090263	BP	GO:0090263	positive regulation of canonical Wnt signaling pathway	11/554	109/18800	0.000372754	0.0232997	0.0201508	TBL1XR1/CAV1/NFKB1/GPC3/SOX4/VPS35/USP34/TNKS/WNK1/XIAP/TNKS2	11
GO:0021537	BP	GO:0021537	telencephalon development	18/554	247/18800	0.000403705	0.0248933	0.021529	CTNNB1/CDH2/TRA2B/BMERB1/XRN2/YWHAE/TENT2/SECISBP2/C12orf57/EMX2/GSK3B/LAMB1/RELN/TSKU/DIXDC1/NRGN/LHX1/ROBO1	18
GO:0000380	BP	GO:0000380	alternative mRNA splicing, via spliceosome	9/554	77/18800	0.000426416	0.0259432	0.022437	SRSF6/WTAP/TRA2B/DDX17/NOVA1/REST/MBNL1/SFPQ/SMU1	9
GO:0072009	BP	GO:0072009	nephron epithelium development	11/554	111/18800	0.00043612	0.0261844	0.0226456	CTNNB1/PAX8/PAX2/JAG1/SOX9/IQGAP1/STAT1/PBX1/GPC3/CD24/LHX1	11
GO:0034612	BP	GO:0034612	response to tumor necrosis factor	18/554	249/18800	0.000444525	0.0263424	0.0227823	VCAM1/ZFP36L1/CLDN1/THBS1/AKAP12/CYP1B1/PPP2CB/CCL2/ZFP36L2/STAT1/LIMS1/NFKB1/CXCL16/ADAM10/XIAP/TNFAIP3/SYK/CD40	18
GO:0021987	BP	GO:0021987	cerebral cortex development	11/554	112/18800	0.000471041	0.0275559	0.0238318	CTNNB1/CDH2/TRA2B/BMERB1/YWHAE/EMX2/GSK3B/LAMB1/RELN/DIXDC1/ROBO1	11
GO:0043547	BP	GO:0043547	positive regulation of GTPase activity	19/554	272/18800	0.000477197	0.0275626	0.0238376	ARHGAP29/RASGEF1B/CCL2/LIMS1/NET1/AFDN/ITGA6/CAV2/S100A10/ARHGAP6/SIPA1L2/ASAP2/TBC1D9/SIPA1L1/GSK3B/RGS4/SIPA1/CD40/ARHGAP35	19
GO:0021543	BP	GO:0021543	pallium development	14/554	169/18800	0.000494348	0.0281963	0.0243856	CTNNB1/CDH2/TRA2B/BMERB1/XRN2/YWHAE/TENT2/EMX2/GSK3B/LAMB1/RELN/TSKU/DIXDC1/ROBO1	14
GO:0050679	BP	GO:0050679	positive regulation of epithelial cell proliferation	16/554	211/18800	0.000541262	0.0304911	0.0263703	CTNNB1/CLDN1/NME2/SRSF6/CDC42/PAX2/SOX9/TCF7L2/CAV2/SP1/PTN/NRP2/VEGFB/LAMB1/NEAT1/TNFAIP3	16
GO:0036293	BP	GO:0036293	response to decreased oxygen levels	20/554	299/18800	0.000594361	0.033074	0.0286041	VCAM1/ZFP36L1/ATP1B1/THBS1/EGR1/CAV1/PDK3/MDM4/CCN2/EGLN1/REST/EP300/PDGFA/CPEB2/CD24/VEGFB/PLOD2/HIPK2/AJUBA/CREBBP	20
GO:0045445	BP	GO:0045445	myoblast differentiation	9/554	81/18800	0.000621592	0.0340524	0.0294502	ZFP36L1/JAG1/SOX9/DDX17/REST/MBNL1/TCF7L2/RB1/IGFBP3	9
GO:0071214	BP	GO:0071214	cellular response to abiotic stimulus	21/554	323/18800	0.000634331	0.0340524	0.0294502	ZFP36L1/EGR1/RHOB/CRIP1/SOX9/NFKB1/NET1/SLC4A11/REST/EP300/TP53INP1/MAP3K1/TENT2/PTPRK/AKR1B1/IFI16/NIPBL/SIPA1/TRIAP1/CREBBP/CD40	21
GO:0104004	BP	GO:0104004	cellular response to environmental stimulus	21/554	323/18800	0.000634331	0.0340524	0.0294502	ZFP36L1/EGR1/RHOB/CRIP1/SOX9/NFKB1/NET1/SLC4A11/REST/EP300/TP53INP1/MAP3K1/TENT2/PTPRK/AKR1B1/IFI16/NIPBL/SIPA1/TRIAP1/CREBBP/CD40	21
GO:0048592	BP	GO:0048592	eye morphogenesis	13/554	154/18800	0.000650412	0.0345097	0.0298457	CTNNB1/PAX2/JAG1/SOX9/PRKCI/MAN2A1/SP3/C12orf57/NIPBL/HIPK2/THRB/TSKU/LHX1	13
GO:0007265	BP	GO:0007265	Ras protein signal transduction	22/554	347/18800	0.000665968	0.0349288	0.0302083	CDC42SE1/ARHGAP29/CDC42/RHOB/ARHGAP5/RASGEF1B/PPP2CB/CDC42EP1/STAMBP/GABARAP/ARHGAP1/NET1/G3BP1/G3BP2/ARHGAP6/RAB33B/COL1A2/CYFIP1/RB1/ARHGAP35/SSX2IP/ROBO1	22
GO:0048041	BP	GO:0048041	focal adhesion assembly	9/554	83/18800	0.00074357	0.0385558	0.033345	THBS1/SDC4/LIMS1/S100A10/ARHGAP6/PTPRK/PTPRA/FAM107A/AJUBA	9
GO:0045785	BP	GO:0045785	positive regulation of cell adhesion	26/554	446/18800	0.000795197	0.0400528	0.0346397	VCAM1/RIN2/TPM1/CAV1/CDC42/HLA-DMA/SDC4/PPP3CA/CCL2/NFKBIZ/CCDC80/LIMS1/AFDN/FN1/SOX4/EDIL3/S100A10/HLA-DMB/CD24/IL6ST/PLPP3/GSK3B/NFAT5/KIFAP3/SYK/RUNX1	26
GO:0007266	BP	GO:0007266	Rho protein signal transduction	12/554	138/18800	0.000798773	0.0400528	0.0346397	CDC42SE1/ARHGAP29/CDC42/RHOB/ARHGAP5/CDC42EP1/ARHGAP1/NET1/ARHGAP6/COL1A2/ARHGAP35/ROBO1	12
GO:0042552	BP	GO:0042552	myelination	12/554	138/18800	0.000798773	0.0400528	0.0346397	CTNNB1/ADGRG6/CTSC/NAB1/B4GALT5/CD9/CYFIP1/CLU/PTN/MAL/ACER3/RNF10	12
GO:0030900	BP	GO:0030900	forebrain development	23/554	376/18800	0.000826809	0.0410079	0.0354658	CTNNB1/NR2F2/CDH2/LRP2/TRA2B/BMERB1/XRN2/CDH1/YWHAE/TENT2/SECISBP2/NRP2/C12orf57/EMX2/GSK3B/LAMB1/RELN/TSKU/DIXDC1/NRGN/LHX1/ARHGAP35/ROBO1	23
GO:0003002	BP	GO:0003002	regionalization	22/554	354/18800	0.000866156	0.0422288	0.0365216	CTNNB1/NR2F2/BHLHE41/PAX8/PAX2/LRP2/TRA2B/PBX1/GPC3/EP300/GRSF1/BHLHE40/PRKACB/HES4/NRP2/EMX2/HIPK2/RELN/LHX1/MEGF8/BPTF/ROBO1	22
GO:0001666	BP	GO:0001666	response to hypoxia	19/554	286/18800	0.000875593	0.0422288	0.0365216	VCAM1/ZFP36L1/ATP1B1/THBS1/EGR1/CAV1/PDK3/MDM4/EGLN1/REST/EP300/PDGFA/CPEB2/CD24/VEGFB/PLOD2/HIPK2/AJUBA/CREBBP	19
GO:2000117	BP	GO:2000117	negative regulation of cysteine-type endopeptidase activity	9/554	85/18800	0.00088438	0.0422288	0.0365216	THBS1/ARL6IP1/RPS6KA3/PAX2/CSNK2A1/CAAP1/XIAP/IFI16/TRIAP1	9
GO:0007272	BP	GO:0007272	ensheathment of neurons	12/554	140/18800	0.000906951	0.0422288	0.0365216	CTNNB1/ADGRG6/CTSC/NAB1/B4GALT5/CD9/CYFIP1/CLU/PTN/MAL/ACER3/RNF10	12
GO:0008366	BP	GO:0008366	axon ensheathment	12/554	140/18800	0.000906951	0.0422288	0.0365216	CTNNB1/ADGRG6/CTSC/NAB1/B4GALT5/CD9/CYFIP1/CLU/PTN/MAL/ACER3/RNF10	12
GO:0072073	BP	GO:0072073	kidney epithelium development	12/554	140/18800	0.000906951	0.0422288	0.0365216	CTNNB1/PAX8/PAX2/SDC4/JAG1/SOX9/IQGAP1/STAT1/PBX1/GPC3/CD24/LHX1	12
GO:0099175	BP	GO:0099175	regulation of postsynapse organization	9/554	86/18800	0.000962496	0.0437383	0.0378271	ARF4/CDH2/SRGN/VPS35/EFNA1/ACTR2/NRP2/SIPA1L1/RELN	9
GO:0051090	BP	GO:0051090	regulation of DNA-binding transcription factor activity	26/554	452/18800	0.000965143	0.0437383	0.0378271	CTNNB1/CAV1/CYP1B1/PPP2CB/RLIM/PPP3CA/EGLN1/UBE2V1/PRKCI/PSMA6/EP300/TCF7L2/G3BP2/BHLHE40/ENPP1/CLU/PLPP3/TRIM22/HIPK2/JMY/FER/TNFAIP3/RELN/SYK/RB1/CD40	26
GO:0048593	BP	GO:0048593	camera-type eye morphogenesis	11/554	122/18800	0.000968128	0.0437383	0.0378271	CTNNB1/PAX2/JAG1/SOX9/MAN2A1/SP3/C12orf57/HIPK2/THRB/TSKU/LHX1	11
GO:0042060	BP	GO:0042060	wound healing	25/554	429/18800	0.00100057	0.044761	0.0387116	CLDN1/SRSF6/THBS1/TPM1/CAV1/SDC4/PPP3CA/CD9/DSP/FN1/PDGFA/DCBLD2/SLC12A2/IL6ST/TNFRSF12A/PLPP3/OCLN/TNFAIP3/SYK/TSKU/DGKH/AJUBA/HNF4A/CD40/ARHGAP35	25
GO:0034349	BP	GO:0034349	glial cell apoptotic process	4/554	16/18800	0.00102358	0.0451427	0.0390417	AKAP12/CCL2/PRKCI/RB1	4
GO:0010586	BP	GO:0010586	miRNA metabolic process	5/554	27/18800	0.00102908	0.0451427	0.0390417	DDX17/NFKB1/TENT2/KCNQ1OT1/BCDIN3D	5
GO:0002064	BP	GO:0002064	epithelial cell development	15/554	203/18800	0.00103925	0.0451427	0.0390417	CLDN1/EZR/CDH2/JAG1/SOX9/IQGAP1/VEZF1/PALLD/AFDN/AKR1B1/IL6ST/FOSL2/GSK3B/HNF4A/CLIC4	15
GO:0061564	BP	GO:0061564	axon development	27/554	479/18800	0.00104868	0.0451427	0.0390417	CDH2/PAX2/IST1/SLITRK2/B4GALT5/NREP/PALLD/ENAH/FN1/EFNA1/CYFIP1/RUFY3/PTN/NRP2/SIPA1L1/C12orf57/GSK3B/MTR/RELN/MARK2/TSKU/DIXDC1/SEMA6D/LHX1/MEGF8/ARHGAP35/ROBO1	27
GO:0001667	BP	GO:0001667	ameboidal-type cell migration	27/554	480/18800	0.00108124	0.0461093	0.0398776	RIN2/NR2F2/THBS1/AKAP12/CDC42/CYP1B1/CDH2/RHOB/SDC4/FSTL1/SOX9/IQGAP1/GPC3/FN1/PKN2/EFNA1/SP1/FOXP1/PTN/NRP2/PLPP3/TNS1/FER/SEMA6D/CD40/MEGF8/ROBO1	27
GO:0003179	BP	GO:0003179	heart valve morphogenesis	7/554	55/18800	0.00110683	0.0467637	0.0404436	MDM4/JAG1/SOX9/SOX4/EFNA1/RB1/ROBO1	7
GO:0045216	BP	GO:0045216	cell-cell junction organization	15/554	205/18800	0.00114725	0.0480264	0.0415357	CTNNB1/CLDN1/CAV1/CDC42/CDH2/PRKCI/CD9/DSP/LIMS1/AFDN/PKN2/CDH1/PLEKHA7/ADAM10/OCLN	15
GO:0005667	CC	GO:0005667	transcription regulator complex	37/568	483/19594	8.50126e-08	4.57368e-05	3.94638e-05	CTNNB1/TBL1XR1/N4BP2L2/MAF/MDM4/JUND/TCEA1/RLIM/CSNK2A1/SOX9/STAT1/RBBP4/PBX1/CEBPD/REST/SOX4/JUNB/EP300/TCF7L2/TLE5/SFPQ/NAA15/SP1/MED31/SP3/NFYB/FOSL2/NFAT5/HIPK2/GTF3C3/THRB/ASCC3/RB1/AJUBA/CREBBP/LHX1/RUNX1	37
GO:0005925	CC	GO:0005925	focal adhesion	32/568	419/19594	6.87463e-07	0.000184928	0.000159564	PPP1CB/CTNNB1/AKAP12/EZR/CAV1/MARCKS/CDC42/CDH2/LPP/RHOB/CDC42EP1/SDC4/IQGAP1/CD9/PALLD/LIMS1/ENAH/PCBP2/RPL30/ITGA6/G3BP1/CAV2/YWHAE/CYFIP1/ADAM10/ACTR2/TNS1/PTPRA/RPL18/FAM107A/DIXDC1/AJUBA	32
GO:0030055	CC	GO:0030055	cell-substrate junction	32/568	428/19594	1.09189e-06	0.000195813	0.000168956	PPP1CB/CTNNB1/AKAP12/EZR/CAV1/MARCKS/CDC42/CDH2/LPP/RHOB/CDC42EP1/SDC4/IQGAP1/CD9/PALLD/LIMS1/ENAH/PCBP2/RPL30/ITGA6/G3BP1/CAV2/YWHAE/CYFIP1/ADAM10/ACTR2/TNS1/PTPRA/RPL18/FAM107A/DIXDC1/AJUBA	32
GO:0016607	CC	GO:0016607	nuclear speck	30/568	411/19594	3.83975e-06	0.000423243	0.000365193	SRSF6/WTAP/PPIG/NFKBIZ/BRD2/DDX17/SPOP/AFDN/SYF2/SFPQ/API5/WBP4/SON/THOC2/KAZN/C12orf57/WAC/PRPF6/DDX39B/SRSF3/IFI16/TRIM22/FAM107A/ASCC3/SMU1/CPSF6/CWC25/CRNKL1/SNRPB2/NCBP3	30
GO:0005681	CC	GO:0005681	spliceosomal complex	19/568	194/19594	3.93349e-06	0.000423243	0.000365193	HNRNPH1/TRA2B/LUC7L/SYF2/API5/WBP4/WBP11/NCL/WAC/PRPF6/DDX39B/TRA2A/RNPC3/CWC27/SMU1/PRPF39/CWC25/CRNKL1/SNRPB2	19
GO:0005912	CC	GO:0005912	adherens junction	17/568	172/19594	1.11517e-05	0.000999939	0.000862793	CTNNB1/EZR/CDH2/CDC42EP1/JAG1/AFDN/CDH1/S100A11/PTPRK/PLEKHA7/PDLIM3/DSC2/ADAM10/PLPP3/FRMD4A/AJUBA/SSX2IP	17
GO:0005911	CC	GO:0005911	cell-cell junction	32/568	497/19594	2.38612e-05	0.0018339	0.00158237	CTNNB1/CLDN1/ATP1B1/EZR/CDC42/CDH2/CDC42EP1/PPP3CA/JAG1/IQGAP1/PRKCI/DSP/LIMS1/AFDN/PKN2/CDH1/S100A11/PTPRK/PLEKHA7/PDLIM3/DSC2/ADAM10/KAZN/PLPP3/CADM3/OCLN/CLDN12/FRMD4A/AJUBA/TRAF4/CLIC4/SSX2IP	32
GO:0035770	CC	GO:0035770	ribonucleoprotein granule	20/568	261/19594	8.04287e-05	0.0049659	0.0042848	ZFP36L1/CDC42/SYNE1/NFKBIZ/IQGAP1/DDX3Y/PSMA6/FLG/MBNL1/G3BP1/G3BP2/GRSF1/TNRC6A/TIAL1/NCL/RPL28/PUM2/LARP4/AJUBA/SNRPB2	20
GO:0031252	CC	GO:0031252	cell leading edge	27/568	416/19594	8.94623e-05	0.0049659	0.0042848	CTNNB1/NME2/TPM1/ARF4/EZR/CDC42/CDH2/RAB3IP/IQGAP1/PRKCI/PALLD/ENAH/SPTBN1/PKN2/CDH1/S100A11/PTPRK/CYFIP1/RUFY3/ACTR2/FAM107A/OCLN/JMY/FER/AJUBA/TUBG1/SSX2IP	27
GO:0036464	CC	GO:0036464	cytoplasmic ribonucleoprotein granule	19/568	243/19594	9.2303e-05	0.0049659	0.0042848	ZFP36L1/CDC42/SYNE1/NFKBIZ/IQGAP1/DDX3Y/PSMA6/FLG/MBNL1/G3BP1/G3BP2/TNRC6A/TIAL1/NCL/RPL28/PUM2/LARP4/AJUBA/SNRPB2	19
GO:0090575	CC	GO:0090575	RNA polymerase II transcription regulator complex	18/568	230/19594	0.000138536	0.00677566	0.00584634	CTNNB1/MAF/JUND/TCEA1/STAT1/PBX1/CEBPD/JUNB/TCF7L2/SFPQ/MED31/NFYB/FOSL2/HIPK2/THRB/ASCC3/RB1/RUNX1	18
GO:0005788	CC	GO:0005788	endoplasmic reticulum lumen	21/568	311/19594	0.000312942	0.0131983	0.0113881	THBS1/COL4A2/COL4A1/CDH2/CTSC/FSTL1/IGFBP4/VCAN/IGFBP5/GPC3/FN1/PDGFA/COL1A2/CLU/ADAM10/COL6A2/MSLN/PRSS23/LAMB1/ADAMTS5/IGFBP3	21
GO:0005684	CC	GO:0005684	U2-type spliceosomal complex	10/568	92/19594	0.000330908	0.0131983	0.0113881	LUC7L/SYF2/WBP4/PRPF6/CWC27/SMU1/PRPF39/CWC25/CRNKL1/SNRPB2	10
GO:0017053	CC	GO:0017053	transcription repressor complex	9/568	76/19594	0.000343451	0.0131983	0.0113881	CTNNB1/TBL1XR1/N4BP2L2/MDM4/JUND/RLIM/REST/SP1/SP3	9
GO:0016328	CC	GO:0016328	lateral plasma membrane	8/568	64/19594	0.000503749	0.0180678	0.0155897	CTNNB1/CLDN1/ATP1B1/IQGAP1/CDH1/SLC12A2/CLDN12/MARK2	8
GO:0019898	CC	GO:0019898	extrinsic component of membrane	20/568	314/19594	0.000895679	0.0301172	0.0259865	CTNNB1/SYTL2/EZR/CDH2/PPP3CA/UMOD/IQGAP1/PAM16/VPS13A/CAV2/CDH1/S100A10/GNG10/GNAI2/MAL/FER/SYK/GFRA1/RNF10/RB1CC1	20
GO:0098978	CC	GO:0098978	glutamatergic synapse	20/568	319/19594	0.00108593	0.0343663	0.0296528	ARF4/RNF19A/PPP3CA/GUCY1B1/SLITRK2/PRKCI/CTTNBP2/SRGN/SPTBN1/VPS35/CDH1/GPC4/TNIK/ADAM10/NRP2/AP2B1/GSK3B/KPNA1/NRGN/RNF10	20
GO:0019897	CC	GO:0019897	extrinsic component of plasma membrane	13/568	170/19594	0.00140079	0.041868	0.0361256	CTNNB1/SYTL2/CDH2/PPP3CA/IQGAP1/CAV2/CDH1/S100A10/GNG10/GNAI2/FER/SYK/RNF10	13
GO:0042788	CC	GO:0042788	polysomal ribosome	5/568	31/19594	0.00183041	0.0499204	0.0430736	RPS28/RPS21/RPL39/RPL30/RPL18	5
GO:0005938	CC	GO:0005938	cell cortex	19/568	310/19594	0.00185578	0.0499204	0.0430736	CTNNB1/AKAP12/EZR/CAV1/MARCKS/SCIN/KRT19/CDH2/RHOB/CCN2/GUCY1B1/IQGAP1/CTTNBP2/SPTBN1/CDH1/SEPTIN8/NCL/ACTR2/FER	19
GO:0019838	MF	GO:0019838	growth factor binding	15/569	139/18410	2.66971e-05	0.00555077	0.0050588	THBS1/IL1R1/COL4A1/CCN2/LRP2/IGFBP4/IGFBP5/ITGA6/PDGFA/COL1A2/API5/NRP2/IL6ST/TSKU/IGFBP3	15
GO:0031994	MF	GO:0031994	insulin-like growth factor I binding	5/569	13/18410	2.90272e-05	0.00555077	0.0050588	LRP2/IGFBP4/IGFBP5/ITGA6/IGFBP3	5
GO:0045295	MF	GO:0045295	gamma-catenin binding	5/569	13/18410	2.90272e-05	0.00555077	0.0050588	CDH2/TCF7L2/CDH1/PTPRK/FER	5
GO:0019902	MF	GO:0019902	phosphatase binding	18/569	193/18410	3.20391e-05	0.00555077	0.0050588	CTNNB1/SYTL2/CDH2/CTSC/PPP6R2/IQGAP1/STAT1/PPP1R3C/STRN3/YWHAE/WNK1/ARPP19/KIFAP3/PTPA/FER/SYK/FOXO1/SFI1	18
GO:0005520	MF	GO:0005520	insulin-like growth factor binding	6/569	29/18410	0.000219837	0.0271199	0.0247162	CCN2/LRP2/IGFBP4/IGFBP5/ITGA6/IGFBP3	6
GO:0045296	MF	GO:0045296	cadherin binding	23/569	333/18410	0.000295136	0.0271199	0.0247162	CTNNB1/ARGLU1/EZR/CDH2/CDC42EP1/IST1/IQGAP1/STAT1/ARHGAP1/SPTBN1/AFDN/ITGA6/PKN2/CDH1/S100A11/EIF2S3/YWHAE/SH3GLB2/BZW1/SERBP1/FER/MARK2/EEF1G	23
GO:0008013	MF	GO:0008013	beta-catenin binding	10/569	86/18410	0.000315732	0.0271199	0.0247162	CTNNB1/TBL1XR1/CDH2/SOX9/EP300/TCF7L2/CDH1/PTPRK/GSK3B/FOXO1	10
GO:0001968	MF	GO:0001968	fibronectin binding	6/569	31/18410	0.000323337	0.0271199	0.0247162	THBS1/CCN2/SDC4/CCDC80/IGFBP5/IGFBP3	6
GO:0005178	MF	GO:0005178	integrin binding	14/569	156/18410	0.000352206	0.0271199	0.0247162	VCAM1/THBS1/CCN2/CD9/FN1/EDIL3/ITGA6/ADAM10/PTN/PLPP3/LAMB1/SYK/GFRA1/ADAMTS5	14
GO:0008022	MF	GO:0008022	protein C-terminus binding	15/569	179/18410	0.000458785	0.0317938	0.0289759	CTNNB1/ATP1B1/EZR/CCN2/PPP2CB/AFDN/FN1/EP300/SP1/NCL/ITGB3BP/NIPBL/VPS36/TNFAIP3/SIPA1	15
GO:0019903	MF	GO:0019903	protein phosphatase binding	13/569	148/18410	0.000694069	0.0437263	0.0398508	CTNNB1/CDH2/PPP6R2/IQGAP1/STAT1/PPP1R3C/STRN3/YWHAE/ARPP19/KIFAP3/PTPA/FER/FOXO1	13

## Sheet: Mes
	ONTOLOGY	ID	Description	GeneRatio	BgRatio	pvalue	p.adjust	qvalue	geneID	Count
GO:0032963	BP	GO:0032963	collagen metabolic process	8/98	101/18800	5.53502e-08	4.15275e-05	3.36908e-05	ITGB1/F2R/COL1A2/CCN2/CYGB/CST3/ENG/MMP2	8
GO:0030198	BP	GO:0030198	extracellular matrix organization	12/98	307/18800	6.73269e-08	4.15275e-05	3.36908e-05	COL3A1/POSTN/COL12A1/ITGB1/PDGFRA/GAS2/COL1A2/CCN2/ADAMTS5/CST3/ENG/MMP2	12
GO:0043062	BP	GO:0043062	extracellular structure organization	12/98	308/18800	6.97585e-08	4.15275e-05	3.36908e-05	COL3A1/POSTN/COL12A1/ITGB1/PDGFRA/GAS2/COL1A2/CCN2/ADAMTS5/CST3/ENG/MMP2	12
GO:0045229	BP	GO:0045229	external encapsulating structure organization	12/98	310/18800	7.48588e-08	4.15275e-05	3.36908e-05	COL3A1/POSTN/COL12A1/ITGB1/PDGFRA/GAS2/COL1A2/CCN2/ADAMTS5/CST3/ENG/MMP2	12
GO:0010712	BP	GO:0010712	regulation of collagen metabolic process	6/98	43/18800	8.96534e-08	4.15275e-05	3.36908e-05	ITGB1/F2R/CCN2/CYGB/CST3/ENG	6
GO:0019058	BP	GO:0019058	viral life cycle	11/98	317/18800	8.01e-07	0.000309186	0.000250839	IFITM3/AGTR1/ITGB1/IFITM2/IFITM1/PPIB/CDC42/APOE/LGALS1/IFI27/ILF3	11
GO:0044403	BP	GO:0044403	biological process involved in symbiotic interaction	10/98	286/18800	2.44427e-06	0.000808705	0.000656094	IFITM3/AGTR1/ITGB1/IFITM2/IFITM1/PPIB/APOE/FN1/LGALS1/IFI27	10
GO:0031589	BP	GO:0031589	cell-substrate adhesion	11/98	364/18800	3.06733e-06	0.000811819	0.00065862	COL3A1/ITGB1/ITGA1/VCAM1/CCN2/THBS1/CD44/CDC42/FZD4/PIK3R1/FN1	11
GO:0035455	BP	GO:0035455	response to interferon-alpha	4/98	20/18800	3.15474e-06	0.000811819	0.00065862	IFITM3/IFITM2/IFITM1/GATA3	4
GO:0007160	BP	GO:0007160	cell-matrix adhesion	9/98	235/18800	3.82996e-06	0.000812364	0.000659063	COL3A1/ITGB1/ITGA1/VCAM1/CCN2/THBS1/CD44/PIK3R1/FN1	9
GO:0007015	BP	GO:0007015	actin filament organization	12/98	450/18800	3.85838e-06	0.000812364	0.000659063	TMSB4X/TMSB10/CALD1/GAS2/SEMA5A/MYO1B/TPM4/CCN2/SPTBN1/CDC42/MARCKS/PIK3R1	12
GO:0019079	BP	GO:0019079	viral genome replication	7/98	134/18800	6.44225e-06	0.00124335	0.00100872	IFITM3/IFITM2/IFITM1/PPIB/CDC42/IFI27/ILF3	7
GO:0007266	BP	GO:0007266	Rho protein signal transduction	7/98	138/18800	7.81885e-06	0.00139296	0.00113009	COL3A1/AGTR1/ITGB1/F2R/COL1A2/CDC42/APOE	7
GO:0016032	BP	GO:0016032	viral process	11/98	418/18800	1.13735e-05	0.00188151	0.00152645	IFITM3/AGTR1/ITGB1/IFITM2/IFITM1/PPIB/CDC42/APOE/LGALS1/IFI27/ILF3	11
GO:0007229	BP	GO:0007229	integrin-mediated signaling pathway	6/98	107/18800	2.03233e-05	0.00313792	0.00254576	COL3A1/ITGB1/ITGA1/CCN2/CDC42/FN1	6
GO:0030193	BP	GO:0030193	regulation of blood coagulation	5/98	66/18800	2.41287e-05	0.00349263	0.00283354	F2R/PDGFRA/TFPI/THBS1/APOE	5
GO:1900046	BP	GO:1900046	regulation of hemostasis	5/98	68/18800	2.79134e-05	0.0037577	0.00304858	F2R/PDGFRA/TFPI/THBS1/APOE	5
GO:0001553	BP	GO:0001553	luteinization	3/98	12/18800	2.92049e-05	0.0037577	0.00304858	PDGFRA/FZD4/MMP2	3
GO:0050818	BP	GO:0050818	regulation of coagulation	5/98	71/18800	3.4437e-05	0.00419768	0.00340554	F2R/PDGFRA/TFPI/THBS1/APOE	5
GO:0048015	BP	GO:0048015	phosphatidylinositol-mediated signaling	7/98	177/18800	3.91868e-05	0.00427739	0.0034702	F2R/PDGFRA/NPR3/HGF/PIK3R1/FN1/GATA3	7
GO:0060326	BP	GO:0060326	cell chemotaxis	9/98	315/18800	3.95566e-05	0.00427739	0.0034702	TMSB4X/AGTR1/PDGFRA/PPIB/ITGA1/VCAM1/HGF/SEMA5A/THBS1	9
GO:0001667	BP	GO:0001667	ameboidal-type cell migration	11/98	480/18800	4.06315e-05	0.00427739	0.0034702	TMSB4X/SPARC/ITGB1/ZEB2/SEMA5A/CYGB/THBS1/CDC42/APOE/FN1/GATA3	11
GO:0032965	BP	GO:0032965	regulation of collagen biosynthetic process	4/98	38/18800	4.47272e-05	0.00429079	0.00348107	F2R/CCN2/CYGB/ENG	4
GO:0048017	BP	GO:0048017	inositol lipid-mediated signaling	7/98	181/18800	4.51753e-05	0.00429079	0.00348107	F2R/PDGFRA/NPR3/HGF/PIK3R1/FN1/GATA3	7
GO:0090066	BP	GO:0090066	regulation of anatomical structure size	11/98	487/18800	4.63168e-05	0.00429079	0.00348107	TMSB4X/AGTR1/F2R/TMSB10/ITGA1/NPR3/SEMA5A/SPTBN1/APOE/MMP2/FN1	11
GO:0061041	BP	GO:0061041	regulation of wound healing	6/98	133/18800	6.91603e-05	0.00600834	0.00487451	ITGB1/F2R/PDGFRA/TFPI/THBS1/APOE	6
GO:0003018	BP	GO:0003018	vascular process in circulatory system	8/98	263/18800	7.00454e-05	0.00600834	0.00487451	AGTR1/F2R/ABCC9/ITGA1/SLC38A2/NPR3/APOE/MMP2	8
GO:0046596	BP	GO:0046596	regulation of viral entry into host cell	4/98	43/18800	7.33013e-05	0.00606307	0.00491891	IFITM3/IFITM2/IFITM1/LGALS1	4
GO:0050886	BP	GO:0050886	endocrine process	5/98	85/18800	8.19085e-05	0.00654138	0.00530695	AGTR1/F2R/SUCNR1/FZD4/GATA3	5
GO:0035296	BP	GO:0035296	regulation of tube diameter	6/98	141/18800	9.5587e-05	0.00714127	0.00579364	AGTR1/F2R/ITGA1/NPR3/APOE/MMP2	6
GO:0097746	BP	GO:0097746	blood vessel diameter maintenance	6/98	141/18800	9.5587e-05	0.00714127	0.00579364	AGTR1/F2R/ITGA1/NPR3/APOE/MMP2	6
GO:0035150	BP	GO:0035150	regulation of tube size	6/98	142/18800	9.93879e-05	0.0071932	0.00583577	AGTR1/F2R/ITGA1/NPR3/APOE/MMP2	6
GO:0032964	BP	GO:0032964	collagen biosynthetic process	4/98	47/18800	0.000104266	0.00731246	0.00593253	F2R/CCN2/CYGB/ENG	4
GO:0014065	BP	GO:0014065	phosphatidylinositol 3-kinase signaling	6/98	144/18800	0.00010735	0.00731246	0.00593253	F2R/PDGFRA/HGF/PIK3R1/FN1/GATA3	6
GO:0030195	BP	GO:0030195	negative regulation of blood coagulation	4/98	48/18800	0.000113292	0.00745058	0.00604458	PDGFRA/TFPI/THBS1/APOE	4
GO:0046718	BP	GO:0046718	viral entry into host cell	6/98	146/18800	0.000115812	0.00745058	0.00604458	IFITM3/AGTR1/ITGB1/IFITM2/IFITM1/LGALS1	6
GO:0022602	BP	GO:0022602	ovulation cycle process	4/98	49/18800	0.000122872	0.00748871	0.00607552	PDGFRA/GAS2/FZD4/MMP2	4
GO:1900047	BP	GO:1900047	negative regulation of hemostasis	4/98	49/18800	0.000122872	0.00748871	0.00607552	PDGFRA/TFPI/THBS1/APOE	4
GO:0052372	BP	GO:0052372	modulation by symbiont of entry into host	4/98	50/18800	0.000133025	0.00770681	0.00625246	IFITM3/IFITM2/IFITM1/LGALS1	4
GO:0052547	BP	GO:0052547	regulation of peptidase activity	10/98	456/18800	0.000133106	0.00770681	0.00625246	F2R/TFPI/HGF/CCN2/THBS1/CST3/COL6A3/CD44/UACA/FN1	10
GO:0044409	BP	GO:0044409	entry into host	6/98	153/18800	0.000149687	0.00845547	0.00685984	IFITM3/AGTR1/ITGB1/IFITM2/IFITM1/LGALS1	6
GO:0050819	BP	GO:0050819	negative regulation of coagulation	4/98	52/18800	0.000155134	0.00849401	0.0068911	PDGFRA/TFPI/THBS1/APOE	4
GO:0007596	BP	GO:0007596	blood coagulation	7/98	221/18800	0.000157704	0.00849401	0.0068911	COL3A1/F2R/PDGFRA/TFPI/THBS1/APOE/FN1	7
GO:0051017	BP	GO:0051017	actin filament bundle assembly	6/98	158/18800	0.000178358	0.00931424	0.00755655	CALD1/MYO1B/CCN2/CDC42/MARCKS/PIK3R1	6
GO:0050817	BP	GO:0050817	coagulation	7/98	226/18800	0.000180976	0.00931424	0.00755655	COL3A1/F2R/PDGFRA/TFPI/THBS1/APOE/FN1	7
GO:0007599	BP	GO:0007599	hemostasis	7/98	227/18800	0.000185948	0.00936209	0.00759537	COL3A1/F2R/PDGFRA/TFPI/THBS1/APOE/FN1	7
GO:0046597	BP	GO:0046597	negative regulation of viral entry into host cell	3/98	22/18800	0.000196838	0.00959479	0.00778416	IFITM3/IFITM2/IFITM1	3
GO:0061572	BP	GO:0061572	actin filament bundle organization	6/98	162/18800	0.000204283	0.00959479	0.00778416	CALD1/MYO1B/CCN2/CDC42/MARCKS/PIK3R1	6
GO:0043903	BP	GO:0043903	regulation of biological process involved in symbiotic interaction	4/98	56/18800	0.000207141	0.00959479	0.00778416	IFITM3/IFITM2/IFITM1/LGALS1	4
GO:0060337	BP	GO:0060337	type I interferon signaling pathway	4/98	56/18800	0.000207141	0.00959479	0.00778416	IFITM3/IFITM2/IFITM1/IFI27	4
GO:0050727	BP	GO:0050727	regulation of inflammatory response	9/98	394/18800	0.000216533	0.00983314	0.00797753	TMSB4X/AGTR1/IL1RL1/FABP4/HGF/SUCNR1/APOE/LGALS1/GATA3	9
GO:0045071	BP	GO:0045071	negative regulation of viral genome replication	4/98	57/18800	0.000221889	0.00988261	0.00801766	IFITM3/IFITM2/IFITM1/ILF3	4
GO:1903034	BP	GO:1903034	regulation of response to wounding	6/98	166/18800	0.000233095	0.0101809	0.00825966	ITGB1/F2R/PDGFRA/TFPI/THBS1/APOE	6
GO:0071357	BP	GO:0071357	cellular response to type I interferon	4/98	58/18800	0.000237379	0.0101809	0.00825966	IFITM3/IFITM2/IFITM1/IFI27	4
GO:0043410	BP	GO:0043410	positive regulation of MAPK cascade	10/98	491/18800	0.000241781	0.0101812	0.00825989	F2R/PDGFRA/ITGA1/HGF/CCN2/THBS1/CD44/CDC42/FZD4/APOE	10
GO:0003081	BP	GO:0003081	regulation of systemic arterial blood pressure by renin-angiotensin	3/98	24/18800	0.000256752	0.0104322	0.00846356	AGTR1/F2R/SUCNR1	3
GO:2001026	BP	GO:2001026	regulation of endothelial cell chemotaxis	3/98	24/18800	0.000256752	0.0104322	0.00846356	TMSB4X/SEMA5A/THBS1	3
GO:0003071	BP	GO:0003071	renal system process involved in regulation of systemic arterial blood pressure	3/98	25/18800	0.000290662	0.0114097	0.0092566	AGTR1/F2R/SUCNR1	3
GO:0032967	BP	GO:0032967	positive regulation of collagen biosynthetic process	3/98	25/18800	0.000290662	0.0114097	0.0092566	F2R/CCN2/ENG	3
GO:0003014	BP	GO:0003014	renal system process	5/98	114/18800	0.000325474	0.0119083	0.00966107	AGTR1/F2R/ADGRF5/NPR3/SUCNR1	5
GO:0043200	BP	GO:0043200	response to amino acid	5/98	114/18800	0.000325474	0.0119083	0.00966107	COL3A1/PDGFRA/COL1A2/CCN2/MMP2	5
GO:0010714	BP	GO:0010714	positive regulation of collagen metabolic process	3/98	26/18800	0.000327335	0.0119083	0.00966107	F2R/CCN2/ENG	3
GO:1903901	BP	GO:1903901	negative regulation of viral life cycle	3/98	26/18800	0.000327335	0.0119083	0.00966107	IFITM3/IFITM2/IFITM1	3
GO:0052126	BP	GO:0052126	movement in host environment	6/98	177/18800	0.000329072	0.0119083	0.00966107	IFITM3/AGTR1/ITGB1/IFITM2/IFITM1/LGALS1	6
GO:0001503	BP	GO:0001503	ossification	9/98	420/18800	0.000346425	0.0121802	0.00988167	IFITM1/COL1A2/HGF/TPM4/CCN2/TNC/MGP/MMP2/SRGN	9
GO:0034340	BP	GO:0034340	response to type I interferon	4/98	64/18800	0.000347104	0.0121802	0.00988167	IFITM3/IFITM2/IFITM1/IFI27	4
GO:0007263	BP	GO:0007263	nitric oxide mediated signal transduction	3/98	27/18800	0.000366863	0.0126814	0.0102883	GUCY1A2/THBS1/APOE	3
GO:0052548	BP	GO:0052548	regulation of endopeptidase activity	9/98	426/18800	0.000384119	0.0130827	0.0106138	F2R/TFPI/HGF/CCN2/THBS1/CST3/COL6A3/CD44/UACA	9
GO:0051897	BP	GO:0051897	positive regulation of protein kinase B signaling	5/98	119/18800	0.000396713	0.0133158	0.0108029	ITGB1/SEMA5A/THBS1/ENG/GATA3	5
GO:0042060	BP	GO:0042060	wound healing	9/98	429/18800	0.000404201	0.0133733	0.0108496	COL3A1/ITGB1/F2R/PDGFRA/TFPI/THBS1/CD44/APOE/FN1	9
GO:0007265	BP	GO:0007265	Ras protein signal transduction	8/98	347/18800	0.000462089	0.0150732	0.0122287	COL3A1/AGTR1/ITGB1/F2R/COL1A2/CDC42/APOE/G3BP1	8
GO:0042698	BP	GO:0042698	ovulation cycle	4/98	70/18800	0.000489087	0.0156487	0.0126957	PDGFRA/GAS2/FZD4/MMP2	4
GO:0051701	BP	GO:0051701	biological process involved in interaction with host	6/98	191/18800	0.000493246	0.0156487	0.0126957	IFITM3/AGTR1/ITGB1/IFITM2/IFITM1/LGALS1	6
GO:0032956	BP	GO:0032956	regulation of actin cytoskeleton organization	8/98	352/18800	0.000507829	0.0158937	0.0128944	TMSB4X/PDGFRA/TMSB10/SEMA5A/CCN2/SPTBN1/CDC42/PIK3R1	8
GO:0110053	BP	GO:0110053	regulation of actin filament organization	7/98	270/18800	0.000530301	0.0163757	0.0132854	TMSB4X/TMSB10/SEMA5A/CCN2/SPTBN1/CDC42/PIK3R1	7
GO:0035767	BP	GO:0035767	endothelial cell chemotaxis	3/98	31/18800	0.000555325	0.0169228	0.0137293	TMSB4X/SEMA5A/THBS1	3
GO:0010631	BP	GO:0010631	epithelial cell migration	8/98	358/18800	0.000567501	0.016969	0.0137668	TMSB4X/SPARC/ITGB1/ZEB2/SEMA5A/THBS1/APOE/GATA3	8
GO:0001101	BP	GO:0001101	response to acid chemical	5/98	129/18800	0.000573873	0.016969	0.0137668	COL3A1/PDGFRA/COL1A2/CCN2/MMP2	5
GO:0030168	BP	GO:0030168	platelet activation	5/98	130/18800	0.000594392	0.016969	0.0137668	COL3A1/F2R/PDGFRA/APOE/FN1	5
GO:0090132	BP	GO:0090132	epithelium migration	8/98	361/18800	0.0005994	0.016969	0.0137668	TMSB4X/SPARC/ITGB1/ZEB2/SEMA5A/THBS1/APOE/GATA3	8
GO:0035456	BP	GO:0035456	response to interferon-beta	3/98	32/18800	0.000610463	0.016969	0.0137668	IFITM3/IFITM2/IFITM1	3
GO:0044788	BP	GO:0044788	modulation by host of viral process	3/98	32/18800	0.000610463	0.016969	0.0137668	PPIB/APOE/IFI27	3
GO:0031032	BP	GO:0031032	actomyosin structure organization	6/98	199/18800	0.000612221	0.016969	0.0137668	ITGB1/PDGFRA/CCN2/CNN3/CDC42/PIK3R1	6
GO:0010595	BP	GO:0010595	positive regulation of endothelial cell migration	5/98	131/18800	0.000615456	0.016969	0.0137668	TMSB4X/SPARC/SEMA5A/THBS1/GATA3	5
GO:0007179	BP	GO:0007179	transforming growth factor beta receptor signaling pathway	6/98	200/18800	0.000628533	0.0171165	0.0138865	COL3A1/ZEB2/COL1A2/USP9Y/THBS1/ENG	6
GO:0071230	BP	GO:0071230	cellular response to amino acid stimulus	4/98	75/18800	0.000635587	0.0171165	0.0138865	COL3A1/PDGFRA/COL1A2/MMP2	4
GO:0043542	BP	GO:0043542	endothelial cell migration	7/98	279/18800	0.000643942	0.0171422	0.0139073	TMSB4X/SPARC/ITGB1/SEMA5A/THBS1/APOE/GATA3	7
GO:0090130	BP	GO:0090130	tissue migration	8/98	366/18800	0.000655781	0.017259	0.014002	TMSB4X/SPARC/ITGB1/ZEB2/SEMA5A/THBS1/APOE/GATA3	8
GO:0061045	BP	GO:0061045	negative regulation of wound healing	4/98	76/18800	0.000668238	0.0173892	0.0141077	PDGFRA/TFPI/THBS1/APOE	4
GO:0043281	BP	GO:0043281	regulation of cysteine-type endopeptidase activity involved in apoptotic process	6/98	204/18800	0.000697183	0.0179408	0.0145552	F2R/HGF/CCN2/THBS1/CD44/UACA	6
GO:0014068	BP	GO:0014068	positive regulation of phosphatidylinositol 3-kinase signaling	4/98	79/18800	0.000773311	0.0194597	0.0157875	F2R/PDGFRA/HGF/FN1	4
GO:0048844	BP	GO:0048844	artery morphogenesis	4/98	79/18800	0.000773311	0.0194597	0.0157875	COL3A1/ADGRF5/APOE/ENG	4
GO:1902903	BP	GO:1902903	regulation of supramolecular fiber organization	8/98	376/18800	0.000781414	0.0194597	0.0157875	TMSB4X/TMSB10/SEMA5A/CCN2/SPTBN1/CDC42/APOE/PIK3R1	8
GO:0010762	BP	GO:0010762	regulation of fibroblast migration	3/98	35/18800	0.000796474	0.019499	0.0158194	ITGB1/CYGB/THBS1	3
GO:1903900	BP	GO:1903900	regulation of viral life cycle	5/98	139/18800	0.00080475	0.019499	0.0158194	IFITM3/IFITM2/IFITM1/LGALS1/ILF3	5
GO:0051607	BP	GO:0051607	defense response to virus	7/98	290/18800	0.00080825	0.019499	0.0158194	IFITM3/ABCC9/IFITM2/IFITM1/IFI27/ILF3/G3BP1	7
GO:0140546	BP	GO:0140546	defense response to symbiont	7/98	291/18800	0.000824692	0.0196906	0.0159748	IFITM3/ABCC9/IFITM2/IFITM1/IFI27/ILF3/G3BP1	7
GO:0018149	BP	GO:0018149	peptide cross-linking	3/98	36/18800	0.00086561	0.0200155	0.0162384	COL3A1/THBS1/FN1	3
GO:0019934	BP	GO:0019934	cGMP-mediated signaling	3/98	36/18800	0.00086561	0.0200155	0.0162384	GUCY1A2/THBS1/APOE	3
GO:0050878	BP	GO:0050878	regulation of body fluid levels	8/98	382/18800	0.000865658	0.0200155	0.0162384	COL3A1/F2R/PDGFRA/TFPI/NPR3/THBS1/APOE/FN1	8
GO:0034764	BP	GO:0034764	positive regulation of transmembrane transport	6/98	213/18800	0.000872871	0.0200155	0.0162384	TMSB4X/ATP1B1/ITGB1/F2R/FXYD2/PIK3R1	6
GO:0050900	BP	GO:0050900	leukocyte migration	8/98	384/18800	0.000895309	0.0203288	0.0164925	ITGB1/PPIB/ITGA1/VCAM1/THBS1/CDC42/UMOD/GATA3	8
GO:0050729	BP	GO:0050729	positive regulation of inflammatory response	5/98	145/18800	0.000972973	0.0218777	0.0177492	AGTR1/IL1RL1/FABP4/SUCNR1/LGALS1	5
GO:0006869	BP	GO:0006869	lipid transport	8/98	391/18800	0.00100558	0.0219203	0.0177837	AGTR1/FABP4/THBS1/RBP5/FZD4/ABCA8/APOE/ABCA6	8
GO:0051651	BP	GO:0051651	maintenance of location in cell	6/98	219/18800	0.00100774	0.0219203	0.0177837	TMSB4X/FTL/F2R/TMSB10/APOE/SRGN	6
GO:0001990	BP	GO:0001990	regulation of systemic arterial blood pressure by hormone	3/98	38/18800	0.00101505	0.0219203	0.0177837	AGTR1/F2R/SUCNR1	3
GO:0071229	BP	GO:0071229	cellular response to acid chemical	4/98	85/18800	0.0010176	0.0219203	0.0177837	COL3A1/PDGFRA/COL1A2/MMP2	4
GO:0009615	BP	GO:0009615	response to virus	8/98	392/18800	0.00102219	0.0219203	0.0177837	IFITM3/ABCC9/IFITM2/IFITM1/GATA3/IFI27/ILF3/G3BP1	8
GO:0032970	BP	GO:0032970	regulation of actin filament-based process	8/98	393/18800	0.00103901	0.0220767	0.0179106	TMSB4X/PDGFRA/TMSB10/SEMA5A/CCN2/SPTBN1/CDC42/PIK3R1	8
GO:0022604	BP	GO:0022604	regulation of cell morphogenesis	7/98	305/18800	0.00108395	0.0227467	0.0184542	SPARC/GAS2/CD44/CDC42/FZD4/MYO10/FN1	7
GO:0040013	BP	GO:0040013	negative regulation of locomotion	8/98	396/18800	0.00109082	0.0227467	0.0184542	COL3A1/IFITM1/SEMA5A/CYGB/THBS1/APOE/ENG/GATA3	8
GO:0035023	BP	GO:0035023	regulation of Rho protein signal transduction	4/98	87/18800	0.00110984	0.0227467	0.0184542	COL3A1/ITGB1/F2R/APOE	4
GO:0045069	BP	GO:0045069	regulation of viral genome replication	4/98	87/18800	0.00110984	0.0227467	0.0184542	IFITM3/IFITM2/IFITM1/ILF3	4
GO:0010749	BP	GO:0010749	regulation of nitric oxide mediated signal transduction	2/98	10/18800	0.00117784	0.0237206	0.0192443	GUCY1A2/THBS1	2
GO:0032754	BP	GO:0032754	positive regulation of interleukin-5 production	2/98	10/18800	0.00117784	0.0237206	0.0192443	IL1RL1/GATA3	2
GO:0097581	BP	GO:0097581	lamellipodium organization	4/98	89/18800	0.00120778	0.024114	0.0195635	ITGB1/CD44/CDC42/PIK3R1	4
GO:0045834	BP	GO:0045834	positive regulation of lipid metabolic process	5/98	153/18800	0.00123631	0.0244727	0.0198544	AGTR1/PDGFRA/ADGRF5/CDC42/APOE	5
GO:0060070	BP	GO:0060070	canonical Wnt signaling pathway	7/98	313/18800	0.00125858	0.0246691	0.0200138	ZEB2/SEMA5A/RBMS3/FZD4/APOE/GATA3/G3BP1	7
GO:2000116	BP	GO:2000116	regulation of cysteine-type endopeptidase activity	6/98	229/18800	0.00126754	0.0246691	0.0200138	F2R/HGF/CCN2/THBS1/CD44/UACA	6
GO:0010594	BP	GO:0010594	regulation of endothelial cell migration	6/98	230/18800	0.0012961	0.0250146	0.0202941	TMSB4X/SPARC/SEMA5A/THBS1/APOE/GATA3	6
GO:0048525	BP	GO:0048525	negative regulation of viral process	4/98	91/18800	0.00131163	0.0251053	0.0203677	IFITM3/IFITM2/IFITM1/ILF3	4
GO:0030574	BP	GO:0030574	collagen catabolic process	3/98	42/18800	0.00136065	0.0257175	0.0208644	ITGB1/CST3/MMP2	3
GO:1903035	BP	GO:1903035	negative regulation of response to wounding	4/98	92/18800	0.00136583	0.0257175	0.0208644	PDGFRA/TFPI/THBS1/APOE	4
GO:0042989	BP	GO:0042989	sequestering of actin monomers	2/98	11/18800	0.00143469	0.0267963	0.0217396	TMSB4X/TMSB10	2
GO:0071604	BP	GO:0071604	transforming growth factor beta production	3/98	43/18800	0.0014572	0.0269454	0.0218605	COL3A1/THBS1/FN1	3
GO:0050792	BP	GO:0050792	regulation of viral process	5/98	159/18800	0.00146594	0.0269454	0.0218605	IFITM3/IFITM2/IFITM1/LGALS1/ILF3	5
GO:0070482	BP	GO:0070482	response to oxygen levels	7/98	324/18800	0.00153392	0.0279728	0.0226941	ATP1B1/GUCY1A2/VCAM1/CCN2/CYGB/THBS1/MMP2	7
GO:0034767	BP	GO:0034767	positive regulation of ion transmembrane transport	5/98	163/18800	0.00163556	0.0295934	0.0240088	TMSB4X/ATP1B1/ITGB1/F2R/FXYD2	5
GO:0048762	BP	GO:0048762	mesenchymal cell differentiation	6/98	244/18800	0.00174985	0.0314159	0.0254874	HGF/SEMA5A/CDC42/ENG/FN1/GATA3	6
GO:0035987	BP	GO:0035987	endodermal cell differentiation	3/98	46/18800	0.0017723	0.0315741	0.0256158	COL12A1/MMP2/FN1	3
GO:0015908	BP	GO:0015908	fatty acid transport	4/98	99/18800	0.00178977	0.031642	0.0256709	FABP4/THBS1/RBP5/APOE	4
GO:1902904	BP	GO:1902904	negative regulation of supramolecular fiber organization	5/98	169/18800	0.00191647	0.033537	0.0272082	TMSB4X/TMSB10/SPTBN1/APOE/PIK3R1	5
GO:0051702	BP	GO:0051702	biological process involved in interaction with symbiont	4/98	101/18800	0.00192592	0.033537	0.0272082	PPIB/APOE/FN1/IFI27	4
GO:0003044	BP	GO:0003044	regulation of systemic arterial blood pressure mediated by a chemical signal	3/98	48/18800	0.00200421	0.0336715	0.0273174	AGTR1/F2R/SUCNR1	3
GO:0010761	BP	GO:0010761	fibroblast migration	3/98	48/18800	0.00200421	0.0336715	0.0273174	ITGB1/CYGB/THBS1	3
GO:0042311	BP	GO:0042311	vasodilation	3/98	48/18800	0.00200421	0.0336715	0.0273174	ITGA1/NPR3/APOE	3
GO:0048483	BP	GO:0048483	autonomic nervous system development	3/98	48/18800	0.00200421	0.0336715	0.0273174	VCAM1/FN1/GATA3	3
GO:0010951	BP	GO:0010951	negative regulation of endopeptidase activity	6/98	251/18800	0.00201762	0.0336715	0.0273174	TFPI/HGF/THBS1/CST3/COL6A3/CD44	6
GO:0010713	BP	GO:0010713	negative regulation of collagen metabolic process	2/98	13/18800	0.00202087	0.0336715	0.0273174	CYGB/CST3	2
GO:0031346	BP	GO:0031346	positive regulation of cell projection organization	7/98	341/18800	0.00204957	0.0338082	0.0274282	HGF/SEMA5A/CDC42/FZD4/APOE/PIK3R1/FN1	7
GO:0071560	BP	GO:0071560	cellular response to transforming growth factor beta stimulus	6/98	252/18800	0.00205827	0.0338082	0.0274282	COL3A1/ZEB2/COL1A2/USP9Y/THBS1/ENG	6
GO:0051489	BP	GO:0051489	regulation of filopodium assembly	3/98	49/18800	0.0021269	0.0344469	0.0279464	CDC42/PIK3R1/MYO10	3
GO:0060986	BP	GO:0060986	endocrine hormone secretion	3/98	49/18800	0.0021269	0.0344469	0.0279464	AGTR1/FZD4/GATA3	3
GO:0010634	BP	GO:0010634	positive regulation of epithelial cell migration	5/98	174/18800	0.0021763	0.0346617	0.0281207	TMSB4X/SPARC/SEMA5A/THBS1/GATA3	5
GO:0032103	BP	GO:0032103	positive regulation of response to external stimulus	8/98	442/18800	0.00217848	0.0346617	0.0281207	TMSB4X/AGTR1/IL1RL1/FABP4/SEMA5A/THBS1/SUCNR1/LGALS1	8
GO:0050673	BP	GO:0050673	epithelial cell proliferation	8/98	443/18800	0.00220917	0.0346617	0.0281207	SPARC/AGTR1/HGF/SEMA5A/THBS1/CDC42/APOE/GATA3	8
GO:0008585	BP	GO:0008585	female gonad development	4/98	105/18800	0.00221943	0.0346617	0.0281207	PDGFRA/GAS2/FZD4/MMP2	4
GO:1990573	BP	GO:1990573	potassium ion import across plasma membrane	3/98	50/18800	0.00225417	0.0346617	0.0281207	ATP1B1/ABCC9/FXYD2	3
GO:0042116	BP	GO:0042116	macrophage activation	4/98	106/18800	0.00229736	0.0346617	0.0281207	IL1RL1/ADGRF5/THBS1/SUCNR1	4
GO:0060840	BP	GO:0060840	artery development	4/98	106/18800	0.00229736	0.0346617	0.0281207	COL3A1/ADGRF5/APOE/ENG	4
GO:0010876	BP	GO:0010876	lipid localization	8/98	446/18800	0.00230328	0.0346617	0.0281207	AGTR1/FABP4/THBS1/RBP5/FZD4/ABCA8/APOE/ABCA6	8
GO:0071559	BP	GO:0071559	response to transforming growth factor beta	6/98	258/18800	0.00231534	0.0346617	0.0281207	COL3A1/ZEB2/COL1A2/USP9Y/THBS1/ENG	6
GO:0010872	BP	GO:0010872	regulation of cholesterol esterification	2/98	14/18800	0.00234969	0.0346617	0.0281207	AGTR1/APOE	2
GO:0043650	BP	GO:0043650	dicarboxylic acid biosynthetic process	2/98	14/18800	0.00234969	0.0346617	0.0281207	HAAO/GLS	2
GO:0044794	BP	GO:0044794	positive regulation by host of viral process	2/98	14/18800	0.00234969	0.0346617	0.0281207	PPIB/APOE	2
GO:0051764	BP	GO:0051764	actin crosslink formation	2/98	14/18800	0.00234969	0.0346617	0.0281207	GAS2/MARCKS	2
GO:0070278	BP	GO:0070278	extracellular matrix constituent secretion	2/98	14/18800	0.00234969	0.0346617	0.0281207	CCN2/ENG	2
GO:0001936	BP	GO:0001936	regulation of endothelial cell proliferation	5/98	178/18800	0.00240197	0.0350487	0.0284347	SPARC/AGTR1/SEMA5A/THBS1/APOE	5
GO:1903522	BP	GO:1903522	regulation of blood circulation	6/98	260/18800	0.00240619	0.0350487	0.0284347	ATP1B1/AGTR1/F2R/ABCC9/CCN2/MMP2	6
GO:0060828	BP	GO:0060828	regulation of canonical Wnt signaling pathway	6/98	261/18800	0.00245262	0.0355016	0.0288021	ZEB2/SEMA5A/RBMS3/FZD4/APOE/G3BP1	6
GO:0010466	BP	GO:0010466	negative regulation of peptidase activity	6/98	262/18800	0.00249971	0.0357548	0.0290075	TFPI/HGF/THBS1/CST3/COL6A3/CD44	6
GO:0016055	BP	GO:0016055	Wnt signaling pathway	8/98	452/18800	0.00250098	0.0357548	0.0290075	ZEB2/SEMA5A/RBMS3/CDC42/FZD4/APOE/GATA3/G3BP1	8
GO:0034446	BP	GO:0034446	substrate adhesion-dependent cell spreading	4/98	109/18800	0.00254245	0.0359043	0.0291288	CDC42/FZD4/PIK3R1/FN1	4
GO:0046545	BP	GO:0046545	development of primary female sexual characteristics	4/98	109/18800	0.00254245	0.0359043	0.0291288	PDGFRA/GAS2/FZD4/MMP2	4
GO:0198738	BP	GO:0198738	cell-cell signaling by wnt	8/98	454/18800	0.00256976	0.0359373	0.0291555	ZEB2/SEMA5A/RBMS3/CDC42/FZD4/APOE/GATA3/G3BP1	8
GO:1902743	BP	GO:1902743	regulation of lamellipodium organization	3/98	53/18800	0.00266399	0.0359373	0.0291555	CD44/CDC42/PIK3R1	3
GO:0010763	BP	GO:0010763	positive regulation of fibroblast migration	2/98	15/18800	0.002702	0.0359373	0.0291555	ITGB1/THBS1	2
GO:0032488	BP	GO:0032488	Cdc42 protein signal transduction	2/98	15/18800	0.002702	0.0359373	0.0291555	CDC42/APOE	2
GO:0032905	BP	GO:0032905	transforming growth factor beta1 production	2/98	15/18800	0.002702	0.0359373	0.0291555	COL3A1/THBS1	2
GO:0036376	BP	GO:0036376	sodium ion export across plasma membrane	2/98	15/18800	0.002702	0.0359373	0.0291555	ATP1B1/FXYD2	2
GO:2001028	BP	GO:2001028	positive regulation of endothelial cell chemotaxis	2/98	15/18800	0.002702	0.0359373	0.0291555	TMSB4X/SEMA5A	2
GO:0008217	BP	GO:0008217	regulation of blood pressure	5/98	183/18800	0.00270745	0.0359373	0.0291555	AGTR1/F2R/COL1A2/NPR3/SUCNR1	5
GO:0045766	BP	GO:0045766	positive regulation of angiogenesis	5/98	183/18800	0.00270745	0.0359373	0.0291555	ITGB1/HGF/SEMA5A/THBS1/ENG	5
GO:1904018	BP	GO:1904018	positive regulation of vasculature development	5/98	183/18800	0.00270745	0.0359373	0.0291555	ITGB1/HGF/SEMA5A/THBS1/ENG	5
GO:0014066	BP	GO:0014066	regulation of phosphatidylinositol 3-kinase signaling	4/98	111/18800	0.00271547	0.0359373	0.0291555	F2R/PDGFRA/HGF/FN1	4
GO:2000146	BP	GO:2000146	negative regulation of cell motility	7/98	361/18800	0.00281814	0.0370841	0.030086	COL3A1/IFITM1/CYGB/THBS1/APOE/ENG/GATA3	7
GO:0044344	BP	GO:0044344	cellular response to fibroblast growth factor stimulus	4/98	113/18800	0.0028964	0.0375958	0.0305011	CCN2/THBS1/CD44/GATA3	4
GO:0002040	BP	GO:0002040	sprouting angiogenesis	5/98	186/18800	0.00290373	0.0375958	0.0305011	AGTR1/ITGB1/SEMA5A/THBS1/CDC42	5
GO:0001818	BP	GO:0001818	negative regulation of cytokine production	7/98	363/18800	0.00290572	0.0375958	0.0305011	TMSB4X/IL1RL1/HGF/THBS1/SRGN/FN1/GATA3	7
GO:0001706	BP	GO:0001706	endoderm formation	3/98	55/18800	0.0029611	0.0378117	0.0306763	COL12A1/MMP2/FN1	3
GO:0002043	BP	GO:0002043	blood vessel endothelial cell proliferation involved in sprouting angiogenesis	3/98	55/18800	0.0029611	0.0378117	0.0306763	AGTR1/SEMA5A/THBS1	3
GO:0051896	BP	GO:0051896	regulation of protein kinase B signaling	5/98	187/18800	0.00297139	0.0378117	0.0306763	ITGB1/SEMA5A/THBS1/ENG/GATA3	5
GO:0098739	BP	GO:0098739	import across plasma membrane	5/98	188/18800	0.00304018	0.0381154	0.0309226	ATP1B1/ITGB1/ABCC9/FXYD2/THBS1	5
GO:0001991	BP	GO:0001991	regulation of systemic arterial blood pressure by circulatory renin-angiotensin	2/98	16/18800	0.00307754	0.0381154	0.0309226	F2R/SUCNR1	2
GO:0034374	BP	GO:0034374	low-density lipoprotein particle remodeling	2/98	16/18800	0.00307754	0.0381154	0.0309226	AGTR1/APOE	2
GO:0050872	BP	GO:0050872	white fat cell differentiation	2/98	16/18800	0.00307754	0.0381154	0.0309226	PDGFRA/FABP4	2
GO:2000651	BP	GO:2000651	positive regulation of sodium ion transmembrane transporter activity	2/98	16/18800	0.00307754	0.0381154	0.0309226	ATP1B1/FXYD2	2
GO:0007178	BP	GO:0007178	transmembrane receptor protein serine/threonine kinase signaling pathway	7/98	368/18800	0.00313383	0.0386062	0.0313208	COL3A1/ZEB2/COL1A2/SPTBN1/USP9Y/THBS1/ENG	7
GO:0051271	BP	GO:0051271	negative regulation of cellular component movement	7/98	369/18800	0.00318106	0.0389806	0.0316246	COL3A1/IFITM1/CYGB/THBS1/APOE/ENG/GATA3	7
GO:0043551	BP	GO:0043551	regulation of phosphatidylinositol 3-kinase activity	3/98	57/18800	0.00327783	0.039955	0.0324151	PDGFRA/CDC42/PIK3R1	3
GO:0001819	BP	GO:0001819	positive regulation of cytokine production	8/98	475/18800	0.00338532	0.0410492	0.0333028	IL1RL1/F2R/HGF/SPTBN1/THBS1/PIK3R1/GATA3/G3BP1	8
GO:0090303	BP	GO:0090303	positive regulation of wound healing	3/98	58/18800	0.00344367	0.0414317	0.0336131	ITGB1/F2R/THBS1	3
GO:0002544	BP	GO:0002544	chronic inflammatory response	2/98	17/18800	0.00347606	0.0414317	0.0336131	VCAM1/THBS1	2
GO:0001935	BP	GO:0001935	endothelial cell proliferation	5/98	194/18800	0.00347734	0.0414317	0.0336131	SPARC/AGTR1/SEMA5A/THBS1/APOE	5
GO:0071774	BP	GO:0071774	response to fibroblast growth factor	4/98	119/18800	0.00348842	0.0414317	0.0336131	CCN2/THBS1/CD44/GATA3	4
GO:0051216	BP	GO:0051216	cartilage development	5/98	195/18800	0.00355437	0.0419996	0.0340738	COL3A1/MAF/CCN2/CD44/MGP	5
GO:0001755	BP	GO:0001755	neural crest cell migration	3/98	59/18800	0.00361456	0.042067	0.0341285	SEMA5A/CDC42/FN1	3
GO:0051353	BP	GO:0051353	positive regulation of oxidoreductase activity	3/98	59/18800	0.00361456	0.042067	0.0341285	AGTR1/NPR3/APOE	3
GO:2000351	BP	GO:2000351	regulation of endothelial cell apoptotic process	3/98	59/18800	0.00361456	0.042067	0.0341285	SEMA5A/THBS1/GATA3	3
GO:0048675	BP	GO:0048675	axon extension	4/98	121/18800	0.00370274	0.0428777	0.0347862	ITGB1/SEMA5A/APOE/FN1	4
GO:1903078	BP	GO:1903078	positive regulation of protein localization to plasma membrane	3/98	60/18800	0.00379056	0.0432963	0.0351259	ITGB1/SPTBN1/PIK3R1	3
GO:0016049	BP	GO:0016049	cell growth	8/98	484/18800	0.00379108	0.0432963	0.0351259	AGTR1/ITGB1/MEG3/SEMA5A/CDC42/TNC/APOE/FN1	8
GO:0050678	BP	GO:0050678	regulation of epithelial cell proliferation	7/98	382/18800	0.00384595	0.0432963	0.0351259	SPARC/AGTR1/SEMA5A/THBS1/CDC42/APOE/GATA3	7
GO:0019221	BP	GO:0019221	cytokine-mediated signaling pathway	8/98	486/18800	0.00388617	0.0432963	0.0351259	TMSB4X/IFITM3/IL1RL1/IFITM2/IFITM1/CD44/FZD4/IFI27	8
GO:0006957	BP	GO:0006957	complement activation, alternative pathway	2/98	18/18800	0.00389734	0.0432963	0.0351259	C7/CFH	2
GO:0034433	BP	GO:0034433	steroid esterification	2/98	18/18800	0.00389734	0.0432963	0.0351259	AGTR1/APOE	2
GO:0034434	BP	GO:0034434	sterol esterification	2/98	18/18800	0.00389734	0.0432963	0.0351259	AGTR1/APOE	2
GO:0034435	BP	GO:0034435	cholesterol esterification	2/98	18/18800	0.00389734	0.0432963	0.0351259	AGTR1/APOE	2
GO:0001704	BP	GO:0001704	formation of primary germ layer	4/98	123/18800	0.00392583	0.0432963	0.0351259	COL12A1/ITGB1/MMP2/FN1	4
GO:0022612	BP	GO:0022612	gland morphogenesis	4/98	123/18800	0.00392583	0.0432963	0.0351259	HGF/CDC42/TNC/MMP2	4
GO:0034113	BP	GO:0034113	heterotypic cell-cell adhesion	3/98	61/18800	0.0039717	0.0435946	0.0353678	ITGB1/VCAM1/CD44	3
GO:0046660	BP	GO:0046660	female sex differentiation	4/98	124/18800	0.00404072	0.044143	0.0358127	PDGFRA/GAS2/FZD4/MMP2	4
GO:0010632	BP	GO:0010632	regulation of epithelial cell migration	6/98	290/18800	0.00411639	0.0445833	0.03617	TMSB4X/SPARC/SEMA5A/THBS1/APOE/GATA3	6
GO:0022617	BP	GO:0022617	extracellular matrix disassembly	3/98	62/18800	0.00415803	0.0445833	0.03617	ADAMTS5/CST3/MMP2	3
GO:0030199	BP	GO:0030199	collagen fibril organization	3/98	62/18800	0.00415803	0.0445833	0.03617	COL3A1/COL12A1/COL1A2	3
GO:0043030	BP	GO:0043030	regulation of macrophage activation	3/98	62/18800	0.00415803	0.0445833	0.03617	IL1RL1/ADGRF5/THBS1	3
GO:0010544	BP	GO:0010544	negative regulation of platelet activation	2/98	19/18800	0.00434111	0.0457	0.037076	PDGFRA/APOE	2
GO:0032634	BP	GO:0032634	interleukin-5 production	2/98	19/18800	0.00434111	0.0457	0.037076	IL1RL1/GATA3	2
GO:0032674	BP	GO:0032674	regulation of interleukin-5 production	2/98	19/18800	0.00434111	0.0457	0.037076	IL1RL1/GATA3	2
GO:0061298	BP	GO:0061298	retina vasculature development in camera-type eye	2/98	19/18800	0.00434111	0.0457	0.037076	PDGFRA/FZD4	2
GO:0019229	BP	GO:0019229	regulation of vasoconstriction	3/98	64/18800	0.00454644	0.0474304	0.0384798	AGTR1/F2R/MMP2	3
GO:0032507	BP	GO:0032507	maintenance of protein location in cell	3/98	64/18800	0.00454644	0.0474304	0.0384798	TMSB4X/TMSB10/SRGN	3
GO:0043523	BP	GO:0043523	regulation of neuron apoptotic process	5/98	207/18800	0.00457697	0.0475348	0.0385645	F2R/ITGA1/CDC42/APOE/GATA3	5
GO:0072577	BP	GO:0072577	endothelial cell apoptotic process	3/98	65/18800	0.0047486	0.0488304	0.0396156	SEMA5A/THBS1/GATA3	3
GO:0036293	BP	GO:0036293	response to decreased oxygen levels	6/98	299/18800	0.00477162	0.0488304	0.0396156	ATP1B1/VCAM1/CCN2/CYGB/THBS1/MMP2	6
GO:0001502	BP	GO:0001502	cartilage condensation	2/98	20/18800	0.00480714	0.0488304	0.0396156	CCN2/MGP	2
GO:0044827	BP	GO:0044827	modulation by host of viral genome replication	2/98	20/18800	0.00480714	0.0488304	0.0396156	PPIB/IFI27	2
GO:1902307	BP	GO:1902307	positive regulation of sodium ion transmembrane transport	2/98	20/18800	0.00480714	0.0488304	0.0396156	ATP1B1/FXYD2	2
GO:0060485	BP	GO:0060485	mesenchyme development	6/98	301/18800	0.0049271	0.0492635	0.039967	HGF/SEMA5A/CDC42/ENG/FN1/GATA3	6
GO:0010812	BP	GO:0010812	negative regulation of cell-substrate adhesion	3/98	66/18800	0.00495613	0.0492635	0.039967	THBS1/FZD4/PIK3R1	3
GO:0015909	BP	GO:0015909	long-chain fatty acid transport	3/98	66/18800	0.00495613	0.0492635	0.039967	FABP4/THBS1/APOE	3
GO:0030837	BP	GO:0030837	negative regulation of actin filament polymerization	3/98	66/18800	0.00495613	0.0492635	0.039967	TMSB4X/TMSB10/SPTBN1	3
GO:0046847	BP	GO:0046847	filopodium assembly	3/98	66/18800	0.00495613	0.0492635	0.039967	CDC42/PIK3R1/MYO10	3
GO:0062023	CC	GO:0062023	collagen-containing extracellular matrix	16/103	429/19594	8.30865e-10	1.14062e-07	9.26217e-08	COL3A1/POSTN/SPARC/COL12A1/COL1A2/SDC3/CCN2/THBS1/ADAMTS5/COL6A3/TNC/APOE/MGP/MMP2/FN1/LGALS1	16
GO:0005788	CC	GO:0005788	endoplasmic reticulum lumen	14/103	311/19594	9.31117e-10	1.14062e-07	9.26217e-08	COL3A1/COL12A1/PPIB/COL1A2/THBS1/ADAMTS5/CST3/COL6A3/TNC/APOE/TXNDC5/FN1/LGALS1/CKAP4	14
GO:0005925	CC	GO:0005925	focal adhesion	13/103	419/19594	3.04081e-07	2.37106e-05	1.92537e-05	IL1RL1/ITGB1/LMO7/PPIB/ITGA1/TPM4/CNN3/CD44/CDC42/TNC/MARCKS/ENG/G3BP1	13
GO:0030055	CC	GO:0030055	cell-substrate junction	13/103	428/19594	3.87112e-07	2.37106e-05	1.92537e-05	IL1RL1/ITGB1/LMO7/PPIB/ITGA1/TPM4/CNN3/CD44/CDC42/TNC/MARCKS/ENG/G3BP1	13
GO:0031093	CC	GO:0031093	platelet alpha granule lumen	6/103	67/19594	1.40215e-06	6.87054e-05	5.57908e-05	TMSB4X/SPARC/HGF/THBS1/SRGN/FN1	6
GO:0031091	CC	GO:0031091	platelet alpha granule	6/103	91/19594	8.45944e-06	0.000345427	0.000280497	TMSB4X/SPARC/HGF/THBS1/SRGN/FN1	6
GO:0098858	CC	GO:0098858	actin-based cell projection	8/103	217/19594	1.91888e-05	0.00058949	0.000478684	ITGB1/PDGFRA/VCAM1/MYO1B/CD302/CD44/CDC42/MYO10	8
GO:0030175	CC	GO:0030175	filopodium	6/103	105/19594	1.92487e-05	0.00058949	0.000478684	ITGB1/VCAM1/MYO1B/CD302/CDC42/MYO10	6
GO:0005581	CC	GO:0005581	collagen trimer	5/103	86/19594	9.04505e-05	0.00246226	0.00199943	COL3A1/COL12A1/COL1A2/EMID1/COL6A3	5
GO:0090533	CC	GO:0090533	cation-transporting ATPase complex	3/103	18/19594	0.000108692	0.00250046	0.00203045	ATP1B1/ABCC9/FXYD2	3
GO:0005902	CC	GO:0005902	microvillus	5/103	90/19594	0.000112265	0.00250046	0.00203045	PDGFRA/VCAM1/MYO1B/CD302/CD44	5
GO:0005938	CC	GO:0005938	cell cortex	8/103	310/19594	0.000232036	0.0047374	0.00384691	CALD1/SEPTIN11/TPM4/CCN2/CD302/SPTBN1/MARCKS/MYO10	8
GO:0098533	CC	GO:0098533	ATPase dependent transmembrane transport complex	3/103	24/19594	0.000263488	0.00478733	0.00388745	ATP1B1/ABCC9/FXYD2	3
GO:0015629	CC	GO:0015629	actin cytoskeleton	10/103	499/19594	0.000297866	0.00478733	0.00388745	CALD1/GAS2/VCAM1/SEPTIN11/MYO1B/TPM4/SPTBN1/CNN3/MARCKS/MYO10	10
GO:0034774	CC	GO:0034774	secretory granule lumen	8/103	322/19594	0.000299632	0.00478733	0.00388745	TMSB4X/SPARC/FTL/HGF/THBS1/TXNDC5/SRGN/FN1	8
GO:0060205	CC	GO:0060205	cytoplasmic vesicle lumen	8/103	325/19594	0.000318832	0.00478733	0.00388745	TMSB4X/SPARC/FTL/HGF/THBS1/TXNDC5/SRGN/FN1	8
GO:0031983	CC	GO:0031983	vesicle lumen	8/103	327/19594	0.000332182	0.00478733	0.00388745	TMSB4X/SPARC/FTL/HGF/THBS1/TXNDC5/SRGN/FN1	8
GO:0045177	CC	GO:0045177	apical part of cell	9/103	424/19594	0.000398763	0.0054276	0.00440738	ATP1B1/LMO7/ADGRF5/VCAM1/MYO1B/CD44/CDC42/UMOD/FN1	9
GO:0042383	CC	GO:0042383	sarcolemma	5/103	131/19594	0.000641489	0.00827183	0.00671698	ATP1B1/ITGB1/SLC38A2/VCAM1/COL6A3	5
GO:0098636	CC	GO:0098636	protein complex involved in cell adhesion	3/103	43/19594	0.00149437	0.0183061	0.0148651	ITGB1/ITGA1/LGALS1	3
GO:0005583	CC	GO:0005583	fibrillar collagen trimer	2/103	12/19594	0.00174515	0.0185896	0.0150953	COL3A1/COL1A2	2
GO:0005890	CC	GO:0005890	sodium:potassium-exchanging ATPase complex	2/103	12/19594	0.00174515	0.0185896	0.0150953	ATP1B1/FXYD2	2
GO:0098643	CC	GO:0098643	banded collagen fibril	2/103	12/19594	0.00174515	0.0185896	0.0150953	COL3A1/COL1A2	2
GO:0009897	CC	GO:0009897	external side of plasma membrane	8/103	455/19594	0.00276183	0.0281937	0.0228941	IL1RL1/ITGB1/PDGFRA/ITGA1/VCAM1/CD302/THBS1/ENG	8
GO:0005201	MF	GO:0005201	extracellular matrix structural constituent	11/101	172/18410	2.63813e-09	8.91689e-07	7.83109e-07	COL3A1/POSTN/SPARC/COL12A1/COL1A2/THBS1/COL6A3/TNC/UMOD/MGP/FN1	11
GO:0043394	MF	GO:0043394	proteoglycan binding	6/101	36/18410	4.00004e-08	6.76006e-06	5.9369e-06	CFH/SEMA5A/THBS1/TNC/APOE/FN1	6
GO:0005518	MF	GO:0005518	collagen binding	7/101	68/18410	8.93325e-08	1.00648e-05	8.83922e-06	SPARC/ITGB1/PPIB/ITGA1/THBS1/CD44/FN1	7
GO:0005539	MF	GO:0005539	glycosaminoglycan binding	10/101	234/18410	6.34952e-07	5.36534e-05	4.71201e-05	POSTN/CFH/SEMA5A/CCN2/THBS1/ADAMTS5/CD44/APOE/ENG/FN1	10
GO:0005178	MF	GO:0005178	integrin binding	8/101	156/18410	2.30343e-06	0.000155712	0.000136751	COL3A1/ITGB1/ITGA1/VCAM1/CCN2/THBS1/ADAMTS5/FN1	8
GO:0003779	MF	GO:0003779	actin binding	12/101	439/18410	5.09632e-06	0.000287093	0.000252134	TMSB4X/ITGB1/TMSB10/CALD1/GAS2/ITPRID2/MYO1B/TPM4/SPTBN1/CNN3/MARCKS/MYO10	12
GO:0050840	MF	GO:0050840	extracellular matrix binding	5/101	55/18410	1.25875e-05	0.000607798	0.000533787	SPARC/ITGB1/THBS1/ADAMTS5/LGALS1	5
GO:0001968	MF	GO:0001968	fibronectin binding	4/101	31/18410	2.39597e-05	0.000961909	0.000844778	ITGB1/CCN2/THBS1/MMP2	4
GO:0048407	MF	GO:0048407	platelet-derived growth factor binding	3/101	11/18410	2.5613e-05	0.000961909	0.000844778	COL3A1/PDGFRA/COL1A2	3
GO:0008201	MF	GO:0008201	heparin binding	7/101	168/18410	3.89286e-05	0.00131579	0.00115556	POSTN/CFH/CCN2/THBS1/ADAMTS5/APOE/FN1	7
GO:0030020	MF	GO:0030020	extracellular matrix structural constituent conferring tensile strength	4/101	41/18410	7.39373e-05	0.00227189	0.00199524	COL3A1/COL12A1/COL1A2/COL6A3	4
GO:1901681	MF	GO:1901681	sulfur compound binding	8/101	267/18410	0.00011124	0.00297387	0.00261174	POSTN/CFH/SEMA5A/CCN2/THBS1/ADAMTS5/APOE/FN1	8
GO:0019838	MF	GO:0019838	growth factor binding	6/101	139/18410	0.000117009	0.00297387	0.00261174	COL3A1/PDGFRA/COL1A2/CCN2/THBS1/ENG	6
GO:0043395	MF	GO:0043395	heparan sulfate proteoglycan binding	3/101	18/18410	0.000123178	0.00297387	0.00261174	CFH/SEMA5A/APOE	3
GO:0051015	MF	GO:0051015	actin filament binding	7/101	214/18410	0.000177397	0.00399735	0.0035106	GAS2/ITPRID2/MYO1B/TPM4/SPTBN1/MARCKS/MYO10	7
GO:0043236	MF	GO:0043236	laminin binding	3/101	27/18410	0.000425988	0.008999	0.0079032	ITGB1/THBS1/LGALS1	3
GO:0005516	MF	GO:0005516	calmodulin binding	6/101	200/18410	0.000821266	0.0163287	0.0143404	CALD1/MYO1B/SPTBN1/CNN3/MARCKS/MYO10	6
GO:0002020	MF	GO:0002020	protease binding	5/101	136/18410	0.000917638	0.0172312	0.015133	COL3A1/ITGB1/COL1A2/CST3/FN1	5
GO:0019955	MF	GO:0019955	cytokine binding	5/101	141/18410	0.00107865	0.0191886	0.0168521	IL1RL1/ITGB1/THBS1/FZD4/ENG	5
GO:0042626	MF	GO:0042626	ATPase-coupled transmembrane transporter activity	4/101	90/18410	0.00151933	0.0256767	0.0225501	ATP1B1/ABCC9/ABCA8/ABCA6	4
GO:0046982	MF	GO:0046982	protein heterodimerization activity	7/101	332/18410	0.00235448	0.0377767	0.0331767	ATP1B1/AGTR1/ITGB1/TCF4/TPM4/FZD4/PIK3R1	7
GO:0140359	MF	GO:0140359	ABC-type transporter activity	3/101	49/18410	0.00245884	0.0377767	0.0331767	ABCC9/ABCA8/ABCA6	3

## Sheet: Endo
	ONTOLOGY	ID	Description	GeneRatio	BgRatio	pvalue	p.adjust	qvalue	geneID	Count
GO:0003151	BP	GO:0003151	outflow tract morphogenesis	5/70	80/18800	1.19834e-05	0.0251411	0.0210907	CDC42/CTNNB1/LRP2/NRP2/MEF2C	5
GO:0001764	BP	GO:0001764	neuron migration	6/70	164/18800	3.32375e-05	0.0348661	0.029249	GPM6A/CTNNB1/NR2F2/NRP2/MEF2C/YWHAE	6
GO:0070262	BP	GO:0070262	peptidyl-serine dephosphorylation	3/70	21/18800	6.26617e-05	0.0438214	0.0367615	PPP3CA/YWHAE/PPM1F	3
GO:0050678	BP	GO:0050678	regulation of epithelial cell proliferation	8/70	382/18800	8.4931e-05	0.0445463	0.0373696	ZFP36L1/CDC42/CTNNB1/NR2F2/EGFL7/CEACAM1/NRP2/MEF2C	8
GO:0060537	BP	GO:0060537	muscle tissue development	8/70	405/18800	0.000127239	0.0469328	0.0393717	DDX17/CDC42/CTNNB1/PPP3CA/NR2F2/LRP2/MEF2C/SORBS2	8
GO:0048863	BP	GO:0048863	stem cell differentiation	6/70	211/18800	0.000134222	0.0469328	0.0393717	GPM6A/CDC42/CTNNB1/N4BP2L2/NRP2/MEF2C	6
GO:0019058	BP	GO:0019058	viral life cycle	7/70	317/18800	0.000175083	0.0492078	0.0412801	HLA-DRB1/NFIA/IFI27/INSR/CDC42/RNASEK/PCBP2	7
GO:0001570	BP	GO:0001570	vasculogenesis	4/70	80/18800	0.000225187	0.0492078	0.0412801	ZFP36L1/CTNNB1/EGFL7/CEACAM1	4
GO:0060914	BP	GO:0060914	heart formation	3/70	32/18800	0.000226926	0.0492078	0.0412801	CTNNB1/LRP2/MEF2C	3
GO:0050673	BP	GO:0050673	epithelial cell proliferation	8/70	443/18800	0.000234546	0.0492078	0.0412801	ZFP36L1/CDC42/CTNNB1/NR2F2/EGFL7/CEACAM1/NRP2/MEF2C	8
GO:0005925	CC	GO:0005925	focal adhesion	10/72	419/19594	2.95182e-06	0.000443806	0.000328328	MARCKS/PPP1CB/CDC42/CTNNB1/YWHAG/HSPG2/CNN3/PCBP2/YWHAE/SORBS2	10
GO:0030055	CC	GO:0030055	cell-substrate junction	10/72	428/19594	3.56471e-06	0.000443806	0.000328328	MARCKS/PPP1CB/CDC42/CTNNB1/YWHAG/HSPG2/CNN3/PCBP2/YWHAE/SORBS2	10
GO:0045177	CC	GO:0045177	apical part of cell	8/72	424/19594	0.000160534	0.0133243	0.00985734	UMOD/ATP1B1/CUBN/CDC42/CTNNB1/LRP2/CEACAM1/SORBS2	8
GO:0005796	CC	GO:0005796	Golgi lumen	4/72	104/19594	0.000584049	0.0363571	0.026897	UMOD/DEFB1/SDC3/HSPG2	4
GO:0005890	CC	GO:0005890	sodium:potassium-exchanging ATPase complex	2/72	12/19594	0.000858156	0.0419663	0.0310467	FXYD2/ATP1B1	2
GO:0031253	CC	GO:0031253	cell projection membrane	6/72	339/19594	0.00153612	0.0419663	0.0310467	UMOD/CUBN/INSR/CTNNB1/LRP2/CEACAM1	6
GO:0012507	CC	GO:0012507	ER to Golgi transport vesicle membrane	3/72	62/19594	0.0015403	0.0419663	0.0310467	HLA-DRB5/HLA-DRB1/SEC22B	3
GO:0030139	CC	GO:0030139	endocytic vesicle	6/72	342/19594	0.00160625	0.0419663	0.0310467	HLA-DRB5/HLA-DRB1/CUBN/CDC42/SEC22B/LRP2	6
GO:0016328	CC	GO:0016328	lateral plasma membrane	3/72	64/19594	0.00168798	0.0419663	0.0310467	ATP1B1/CTNNB1/CEACAM1	3
GO:0042613	CC	GO:0042613	MHC class II protein complex	2/72	17/19594	0.00174743	0.0419663	0.0310467	HLA-DRB5/HLA-DRB1	2
GO:0090533	CC	GO:0090533	cation-transporting ATPase complex	2/72	18/19594	0.00196119	0.0419663	0.0310467	FXYD2/ATP1B1	2
GO:0016324	CC	GO:0016324	apical plasma membrane	6/72	358/19594	0.00202247	0.0419663	0.0310467	UMOD/ATP1B1/CUBN/LRP2/CEACAM1/SORBS2	6
GO:0030669	CC	GO:0030669	clathrin-coated endocytic vesicle membrane	3/72	72/19594	0.00236612	0.0420832	0.0311332	HLA-DRB5/HLA-DRB1/LRP2	3
GO:0098685	CC	GO:0098685	Schaffer collateral - CA1 synapse	3/72	72/19594	0.00236612	0.0420832	0.0311332	CDC42/CTNNB1/PPP3CA	3
GO:0023026	MF	GO:0023026	MHC class II protein complex binding	4/71	27/18410	3.33282e-06	0.000819874	0.000638498	HLA-DRB5/HLA-DRB1/ATP1B1/YWHAE	4
GO:0023023	MF	GO:0023023	MHC protein complex binding	4/71	36/18410	1.08971e-05	0.00134035	0.00104383	HLA-DRB5/HLA-DRB1/ATP1B1/YWHAE	4

## Sheet: PEC
	ONTOLOGY	ID	Description	GeneRatio	BgRatio	pvalue	p.adjust	qvalue	geneID	Count
GO:0022613	BP	GO:0022613	ribonucleoprotein complex biogenesis	77/486	448/18800	3.11054e-41	1.14748e-37	1.01142e-37	HSP90AA1/RPS21/HSP90AB1/RPS24/NPM1/RPS17/PA2G4/SNRPB/C1QBP/NOP56/RBIS/LYAR/XRCC5/PRKDC/RPS19/RPL7A/DDX39B/PTGES3/EIF3A/RPL38/RPSA/PRPF8/XPO1/RPL26/RPL35A/RAN/DDX21/WDR43/NOLC1/GTF3A/EIF4B/MRTO4/DKC1/NHP2/MRPL20/NOB1/KRR1/FBL/TAF9/SNRPG/SNU13/LSM4/RPF2/SNRPE/SNRPD1/SRSF1/RPL6/SNRPF/LUC7L3/RPL5/LUC7L2/BRIX1/UTP4/DDX3X/MALSU1/DDX27/LSM6/NPM3/MRPS2/SCAF11/XRN2/DDX1/LSM2/NIFK/EIF4H/EIF4A3/EIF5/POP7/EI…	77
GO:0002181	BP	GO:0002181	cytoplasmic translation	41/486	146/18800	4.14608e-31	7.64745e-28	6.74066e-28	RPL36A/RPL17/RPS21/RPS2/RPS24/RPL39/RPL18/RPS12/EIF4A1/RPL37/RPS17/YBX1/RPL30/RPS23/RPS26/HNRNPD/RPS19/RPS3/RPL7A/HNRNPU/EIF3A/RPL38/RPSA/PKM/RPL26/RPL35A/RPS29/EIF4B/EIF4G1/EIF3M/RPS13/ZC3H15/RPL6/RPL5/EIF3I/EIF4H/RPS10/EIF5/EIF2S2/EIF2S3/RPL22L1	41
GO:0008380	BP	GO:0008380	RNA splicing	60/486	438/18800	1.32466e-26	1.62889e-23	1.43575e-23	NCL/YBX1/SNRPB/C1QBP/PNN/RPS26/ALYREF/LGALS3/HNRNPA2B1/HNRNPU/DDX39B/RBM25/THOC2/SF3B3/HNRNPA3/PRPF8/HNRNPM/HNRNPR/DDX5/HNRNPH1/LSM7/SRRM2/SFPQ/SRSF7/FUS/HNRNPK/WTAP/ZRANB2/RPS13/SNRPG/SNU13/LSM4/HNRNPF/DDX46/SNRPE/SNRPA1/SNRPD1/SRSF1/SNRPF/LUC7L3/TRA2B/SON/LUC7L2/SRSF3/LSM6/HNRNPH3/NONO/SCAF11/DDX1/PRMT1/LSM2/LSM8/EIF4A3/RBM8A/SF3B2/HNRNPC/SF3B1/LSM5/RBM39/SRSF10	60
GO:0042254	BP	GO:0042254	ribosome biogenesis	50/486	304/18800	5.85533e-26	5.40008e-23	4.75977e-23	RPS21/RPS24/NPM1/RPS17/PA2G4/C1QBP/NOP56/RBIS/LYAR/XRCC5/PRKDC/RPS19/RPL7A/RPL38/RPSA/XPO1/RPL26/RPL35A/RAN/DDX21/WDR43/NOLC1/GTF3A/MRTO4/DKC1/NHP2/MRPL20/NOB1/KRR1/FBL/SNU13/RPF2/RPL6/RPL5/BRIX1/UTP4/DDX3X/MALSU1/DDX27/LSM6/NPM3/MRPS2/XRN2/NIFK/EIF4A3/POP7/ABCE1/METTL5/NSA2/NOP16	50
GO:0000377	BP	GO:0000377	RNA splicing, via transesterification reactions with bulged adenosine as nucleophile	51/486	321/18800	9.72119e-26	5.97691e-23	5.2682e-23	NCL/SNRPB/C1QBP/PNN/ALYREF/HNRNPA2B1/HNRNPU/DDX39B/RBM25/SF3B3/HNRNPA3/PRPF8/HNRNPM/HNRNPR/DDX5/HNRNPH1/LSM7/SRRM2/SFPQ/SRSF7/HNRNPK/WTAP/SNRPG/SNU13/LSM4/HNRNPF/DDX46/SNRPE/SNRPA1/SNRPD1/SRSF1/SNRPF/LUC7L3/TRA2B/SON/LUC7L2/SRSF3/LSM6/HNRNPH3/SCAF11/DDX1/LSM2/LSM8/EIF4A3/RBM8A/SF3B2/HNRNPC/SF3B1/LSM5/RBM39/SRSF10	51
GO:0000398	BP	GO:0000398	mRNA splicing, via spliceosome	51/486	321/18800	9.72119e-26	5.97691e-23	5.2682e-23	NCL/SNRPB/C1QBP/PNN/ALYREF/HNRNPA2B1/HNRNPU/DDX39B/RBM25/SF3B3/HNRNPA3/PRPF8/HNRNPM/HNRNPR/DDX5/HNRNPH1/LSM7/SRRM2/SFPQ/SRSF7/HNRNPK/WTAP/SNRPG/SNU13/LSM4/HNRNPF/DDX46/SNRPE/SNRPA1/SNRPD1/SRSF1/SNRPF/LUC7L3/TRA2B/SON/LUC7L2/SRSF3/LSM6/HNRNPH3/SCAF11/DDX1/LSM2/LSM8/EIF4A3/RBM8A/SF3B2/HNRNPC/SF3B1/LSM5/RBM39/SRSF10	51
GO:0000375	BP	GO:0000375	RNA splicing, via transesterification reactions	51/486	325/18800	1.75913e-25	9.2706e-23	8.17135e-23	NCL/SNRPB/C1QBP/PNN/ALYREF/HNRNPA2B1/HNRNPU/DDX39B/RBM25/SF3B3/HNRNPA3/PRPF8/HNRNPM/HNRNPR/DDX5/HNRNPH1/LSM7/SRRM2/SFPQ/SRSF7/HNRNPK/WTAP/SNRPG/SNU13/LSM4/HNRNPF/DDX46/SNRPE/SNRPA1/SNRPD1/SRSF1/SNRPF/LUC7L3/TRA2B/SON/LUC7L2/SRSF3/LSM6/HNRNPH3/SCAF11/DDX1/LSM2/LSM8/EIF4A3/RBM8A/SF3B2/HNRNPC/SF3B1/LSM5/RBM39/SRSF10	51
GO:0071826	BP	GO:0071826	ribonucleoprotein complex subunit organization	40/486	208/18800	1.41586e-23	6.5289e-21	5.75474e-21	HSP90AA1/HSP90AB1/SNRPB/XRCC5/PRKDC/RPS19/DDX39B/PTGES3/EIF3A/RPL38/RPSA/PRPF8/EIF4B/MRTO4/MRPL20/TAF9/SNRPG/SNU13/LSM4/RPF2/SNRPE/SNRPD1/SRSF1/RPL6/SNRPF/LUC7L3/RPL5/LUC7L2/BRIX1/SCAF11/DDX1/LSM2/EIF4H/EIF5/KIF5B/EIF2S2/RUVBL1/SF3B1/EIF2S3/SRSF10	40
GO:0022618	BP	GO:0022618	ribonucleoprotein complex assembly	39/486	200/18800	3.03496e-23	1.244e-20	1.09649e-20	HSP90AA1/HSP90AB1/SNRPB/XRCC5/PRKDC/RPS19/DDX39B/PTGES3/EIF3A/RPL38/RPSA/PRPF8/EIF4B/MRTO4/MRPL20/TAF9/SNRPG/SNU13/LSM4/RPF2/SNRPE/SNRPD1/SRSF1/RPL6/SNRPF/LUC7L3/RPL5/LUC7L2/BRIX1/SCAF11/DDX1/LSM2/EIF4H/EIF5/EIF2S2/RUVBL1/SF3B1/EIF2S3/SRSF10	39
GO:0006397	BP	GO:0006397	mRNA processing	58/486	500/18800	4.9554e-22	1.82805e-19	1.61129e-19	NCL/YBX1/SNRPB/C1QBP/PNN/ALYREF/LGALS3/HNRNPA2B1/HNRNPU/DDX39B/RBM25/THOC2/SF3B3/HNRNPA3/PRPF8/HNRNPM/HNRNPR/DDX5/HNRNPH1/LSM7/SRRM2/SFPQ/SRSF7/HNRNPK/WTAP/PAPOLA/ZRANB2/SNRPG/SNU13/LSM4/HNRNPF/DDX46/SNRPE/SNRPA1/SNRPD1/SRSF1/SNRPF/LUC7L3/TRA2B/SON/LUC7L2/SRSF3/LSM6/HNRNPH3/NONO/SCAF11/XRN2/DDX1/LSM2/LSM8/EIF4A3/RBM8A/SF3B2/HNRNPC/SF3B1/LSM5/RBM39/SRSF10	58
GO:0006403	BP	GO:0006403	RNA localization	33/486	196/18800	8.39919e-18	2.81678e-15	2.48279e-15	EIF5A/NPM1/CCT6A/YBX1/CCT5/ALYREF/HNRNPAB/HNRNPA2B1/HNRNPU/DDX39B/THOC2/HNRNPA3/KPNB1/CCT2/XPO1/RAN/SRSF7/DKC1/NHP2/SSB/CCT3/FBL/CCT8/SRSF1/SRSF3/TCP1/LRPPRC/UPF3A/NUTF2/RUVBL1/TOMM20/CCT4/MRPL18	33
GO:0006457	BP	GO:0006457	protein folding	34/486	212/18800	1.25576e-17	3.86042e-15	3.40267e-15	HSP90AA1/HSP90AB1/CCT6A/HSPD1/HSP90B1/CCT5/PRDX4/FKBP11/PPIB/CALR/HSPH1/HSPA5/PTGES3/CCT2/SDF2L1/LMAN1/PDIA3/CCT3/PPIA/CCT8/HSPE1/TCP1/NUDC/DNAJC7/PDCD5/HSPA9/HSPA4/PFDN2/DNAJC21/TRAP1/AHSA1/CDC37/CANX/CCT4	34
GO:0006364	BP	GO:0006364	rRNA processing	34/486	226/18800	9.50255e-17	2.69653e-14	2.37679e-14	RPS21/RPS24/RPS17/PA2G4/NOP56/LYAR/PRKDC/RPS19/RPL7A/RPL26/RPL35A/DDX21/WDR43/NOLC1/MRTO4/DKC1/NHP2/NOB1/KRR1/FBL/SNU13/RPF2/RPL5/BRIX1/UTP4/DDX27/LSM6/NPM3/XRN2/NIFK/EIF4A3/POP7/METTL5/NSA2	34
GO:0016072	BP	GO:0016072	rRNA metabolic process	36/486	264/18800	2.89005e-16	7.61529e-14	6.71231e-14	RPS21/NCL/RPS24/RPS17/PA2G4/NOP56/LYAR/PRKDC/RPS19/RPL7A/RPL26/RPL35A/DDX21/WDR43/NOLC1/GTF3A/MRTO4/DKC1/NHP2/NOB1/KRR1/FBL/SNU13/RPF2/RPL5/BRIX1/UTP4/DDX27/LSM6/NPM3/XRN2/NIFK/EIF4A3/POP7/METTL5/NSA2	36
GO:0006413	BP	GO:0006413	translational initiation	25/486	120/18800	4.79126e-16	1.17833e-13	1.03861e-13	NPM1/EIF4A1/RPS17/RPS3/EIF3A/EIF1AX/EIF4B/BZW2/EIF3F/EIF4G1/EIF3M/EIF3J/DDX3X/EIF3I/TMED2/DDX1/EIF4H/EIF5/EIF5B/EIF2S2/EIF4G2/ABCE1/EIF2AK1/BZW1/EIF2S3	25
GO:0061077	BP	GO:0061077	chaperone-mediated protein folding	18/486	70/18800	1.306e-13	3.01115e-11	2.65411e-11	CCT6A/CCT5/FKBP11/PPIB/HSPH1/HSPA5/PTGES3/CCT2/SDF2L1/CCT3/CCT8/HSPE1/TCP1/DNAJC7/PDCD5/HSPA9/TRAP1/CCT4	18
GO:0042273	BP	GO:0042273	ribosomal large subunit biogenesis	18/486	72/18800	2.22402e-13	4.82612e-11	4.25387e-11	NPM1/RPL7A/RPL38/RPL26/RPL35A/GTF3A/MRTO4/NHP2/MRPL20/SNU13/RPF2/RPL6/RPL5/BRIX1/MALSU1/NIFK/NSA2/NOP16	18
GO:1904874	BP	GO:1904874	positive regulation of telomerase RNA localization to Cajal body	10/486	15/18800	3.2533e-13	6.66746e-11	5.87687e-11	CCT6A/CCT5/CCT2/DKC1/NHP2/CCT3/CCT8/TCP1/RUVBL1/CCT4	10
GO:0000723	BP	GO:0000723	telomere maintenance	23/486	132/18800	4.04862e-13	7.86071e-11	6.92863e-11	HSP90AA1/HSP90AB1/CCT6A/CCT5/XRCC5/HNRNPD/PRKDC/HNRNPA2B1/HNRNPU/PTGES3/CCT2/PARP1/PCNA/DKC1/NHP2/APEX1/CCT3/CCT8/TCP1/HNRNPC/RFC1/GNL3/CCT4	23
GO:1904816	BP	GO:1904816	positive regulation of protein localization to chromosome, telomeric region	9/486	12/18800	9.84228e-13	1.81541e-10	1.60015e-10	CCT6A/CCT5/CCT2/DKC1/CCT3/CCT8/TCP1/GNL3/CCT4	9
GO:0033044	BP	GO:0033044	regulation of chromosome organization	28/486	212/18800	1.40754e-12	2.47258e-10	2.1794e-10	CCT6A/CENPF/TOP2A/CCNB1/CCT5/XRCC5/HNRNPD/DNMT1/UBE2C/PTTG1/HNRNPA2B1/HNRNPU/CCT2/PARP1/CENPV/SFPQ/DKC1/TRIM28/CCT3/CCT8/SMARCA5/TCP1/ANAPC15/HNRNPC/RUVBL1/GNL3/CCT4/SSBP1	28
GO:0006417	BP	GO:0006417	regulation of translation	42/486	463/18800	1.64077e-12	2.64876e-10	2.33468e-10	NCL/EIF5A/NPM1/PA2G4/YBX1/C1QBP/HNRNPD/PRKDC/RPS3/CALR/HNRNPU/RPL38/PKM/RPL26/NOLC1/EIF4B/BZW2/EIF4G1/PUM3/ILF3/RPL5/CAPRIN1/DDX3X/LRPPRC/UPF3A/MALSU1/TRAP1/TMED2/DDX1/EIF4H/EIF4A3/EIF5/EIF5B/EIF4G2/ABCE1/RBM8A/EIF2AK1/BZW1/METTL5/MTPN/EIF2S3/ZNF706	42
GO:0034470	BP	GO:0034470	ncRNA processing	40/486	424/18800	1.65143e-12	2.64876e-10	2.33468e-10	RPS21/RPS24/RPS17/PA2G4/NOP56/LYAR/PRKDC/RPS19/HNRNPA2B1/RPL7A/DUS1L/RPL26/RPL35A/DDX21/WDR43/DDX5/NOLC1/MRTO4/DKC1/NHP2/SSB/NOB1/KRR1/FBL/SNU13/RPF2/RPL5/BRIX1/UTP4/DDX3X/DDX27/LSM6/NPM3/XRN2/DDX1/NIFK/EIF4A3/POP7/METTL5/NSA2	40
GO:0010833	BP	GO:0010833	telomere maintenance via telomere lengthening	18/486	81/18800	1.97779e-12	3.04003e-10	2.67956e-10	HSP90AA1/HSP90AB1/CCT6A/CCT5/XRCC5/HNRNPA2B1/HNRNPU/PTGES3/CCT2/PARP1/DKC1/NHP2/CCT3/CCT8/TCP1/HNRNPC/RFC1/CCT4	18
GO:1904872	BP	GO:1904872	regulation of telomerase RNA localization to Cajal body	10/486	18/18800	4.42077e-12	6.52329e-10	5.7498e-10	CCT6A/CCT5/CCT2/DKC1/NHP2/CCT3/CCT8/TCP1/RUVBL1/CCT4	10
GO:1904851	BP	GO:1904851	positive regulation of establishment of protein localization to telomere	8/486	10/18800	8.10353e-12	1.08505e-09	9.56391e-10	CCT6A/CCT5/CCT2/DKC1/CCT3/CCT8/TCP1/CCT4	8
GO:1904814	BP	GO:1904814	regulation of protein localization to chromosome, telomeric region	9/486	14/18800	8.55218e-12	1.08505e-09	9.56391e-10	CCT6A/CCT5/CCT2/DKC1/CCT3/CCT8/TCP1/GNL3/CCT4	9
GO:0090670	BP	GO:0090670	RNA localization to Cajal body	10/486	19/18800	9.11807e-12	1.08505e-09	9.56391e-10	CCT6A/CCT5/CCT2/DKC1/NHP2/CCT3/CCT8/TCP1/RUVBL1/CCT4	10
GO:0090671	BP	GO:0090671	telomerase RNA localization to Cajal body	10/486	19/18800	9.11807e-12	1.08505e-09	9.56391e-10	CCT6A/CCT5/CCT2/DKC1/NHP2/CCT3/CCT8/TCP1/RUVBL1/CCT4	10
GO:0090672	BP	GO:0090672	telomerase RNA localization	10/486	19/18800	9.11807e-12	1.08505e-09	9.56391e-10	CCT6A/CCT5/CCT2/DKC1/NHP2/CCT3/CCT8/TCP1/RUVBL1/CCT4	10
GO:0090685	BP	GO:0090685	RNA localization to nucleus	10/486	19/18800	9.11807e-12	1.08505e-09	9.56391e-10	CCT6A/CCT5/CCT2/DKC1/NHP2/CCT3/CCT8/TCP1/RUVBL1/CCT4	10
GO:0007004	BP	GO:0007004	telomere maintenance via telomerase	16/486	69/18800	1.68967e-11	1.94787e-09	1.71691e-09	HSP90AA1/HSP90AB1/CCT6A/CCT5/XRCC5/HNRNPU/PTGES3/CCT2/DKC1/NHP2/CCT3/CCT8/TCP1/HNRNPC/RFC1/CCT4	16
GO:0070203	BP	GO:0070203	regulation of establishment of protein localization to telomere	8/486	11/18800	2.90414e-11	3.06097e-09	2.69802e-09	CCT6A/CCT5/CCT2/DKC1/CCT3/CCT8/TCP1/CCT4	8
GO:1904869	BP	GO:1904869	regulation of protein localization to Cajal body	8/486	11/18800	2.90414e-11	3.06097e-09	2.69802e-09	CCT6A/CCT5/CCT2/DKC1/CCT3/CCT8/TCP1/CCT4	8
GO:1904871	BP	GO:1904871	positive regulation of protein localization to Cajal body	8/486	11/18800	2.90414e-11	3.06097e-09	2.69802e-09	CCT6A/CCT5/CCT2/DKC1/CCT3/CCT8/TCP1/CCT4	8
GO:0032200	BP	GO:0032200	telomere organization	23/486	162/18800	3.26143e-11	3.34206e-09	2.94577e-09	HSP90AA1/HSP90AB1/CCT6A/CCT5/XRCC5/HNRNPD/PRKDC/HNRNPA2B1/HNRNPU/PTGES3/CCT2/PARP1/PCNA/DKC1/NHP2/APEX1/CCT3/CCT8/TCP1/HNRNPC/RFC1/GNL3/CCT4	23
GO:0042255	BP	GO:0042255	ribosome assembly	15/486	62/18800	3.7894e-11	3.77813e-09	3.33014e-09	NPM1/C1QBP/XRCC5/PRKDC/RPS19/RPL38/RPSA/MRTO4/MRPL20/RPF2/RPL6/RPL5/BRIX1/DDX3X/MRPS2	15
GO:0006278	BP	GO:0006278	RNA-templated DNA biosynthetic process	16/486	75/18800	6.54709e-11	6.35584e-09	5.6022e-09	HSP90AA1/HSP90AB1/CCT6A/CCT5/XRCC5/HNRNPU/PTGES3/CCT2/DKC1/NHP2/CCT3/CCT8/TCP1/HNRNPC/RFC1/CCT4	16
GO:0043484	BP	GO:0043484	regulation of RNA splicing	22/486	154/18800	7.75658e-11	7.33693e-09	6.46696e-09	NCL/C1QBP/RPS26/HNRNPA2B1/HNRNPU/RBM25/DDX5/HNRNPH1/SRSF7/FUS/HNRNPK/WTAP/RPS13/HNRNPF/SRSF1/TRA2B/SON/SRSF3/HNRNPH3/RBM8A/RBM39/SRSF10	22
GO:0070202	BP	GO:0070202	regulation of establishment of protein localization to chromosome	8/486	12/18800	8.51559e-11	7.47953e-09	6.59264e-09	CCT6A/CCT5/CCT2/DKC1/CCT3/CCT8/TCP1/CCT4	8
GO:1903405	BP	GO:1903405	protein localization to nuclear body	8/486	12/18800	8.51559e-11	7.47953e-09	6.59264e-09	CCT6A/CCT5/CCT2/DKC1/CCT3/CCT8/TCP1/CCT4	8
GO:1904867	BP	GO:1904867	protein localization to Cajal body	8/486	12/18800	8.51559e-11	7.47953e-09	6.59264e-09	CCT6A/CCT5/CCT2/DKC1/CCT3/CCT8/TCP1/CCT4	8
GO:1990173	BP	GO:1990173	protein localization to nucleoplasm	8/486	14/18800	4.9354e-10	4.23412e-08	3.73206e-08	CCT6A/CCT5/CCT2/DKC1/CCT3/CCT8/TCP1/CCT4	8
GO:0002183	BP	GO:0002183	cytoplasmic translational initiation	10/486	27/18800	6.91341e-10	5.79626e-08	5.10898e-08	EIF4A1/EIF3A/EIF4B/EIF4G1/EIF3M/EIF3I/EIF4H/EIF5/EIF2S2/EIF2S3	10
GO:2001252	BP	GO:2001252	positive regulation of chromosome organization	16/486	89/18800	9.69021e-10	7.94382e-08	7.00189e-08	CCT6A/CCT5/XRCC5/HNRNPD/DNMT1/HNRNPA2B1/CCT2/SFPQ/DKC1/TRIM28/CCT3/CCT8/TCP1/GNL3/CCT4/SSBP1	16
GO:0051054	BP	GO:0051054	positive regulation of DNA metabolic process	27/486	263/18800	1.19455e-09	9.57976e-08	8.44385e-08	HSP90AA1/HSP90AB1/HMGB1/CCT6A/CCT5/XRCC5/HNRNPD/PRKDC/CDK1/HNRNPA2B1/RPS3/PTGES3/CCT2/PARP1/PCNA/DKC1/FUS/TRIM28/CCT3/STOML2/CCT8/SMARCA5/TCP1/RUVBL1/GNL3/CCT4/SSBP1	27
GO:0032204	BP	GO:0032204	regulation of telomere maintenance	15/486	80/18800	1.76332e-09	1.38402e-07	1.21991e-07	CCT6A/CCT5/XRCC5/HNRNPD/HNRNPA2B1/HNRNPU/CCT2/PARP1/DKC1/CCT3/CCT8/TCP1/HNRNPC/GNL3/CCT4	15
GO:0070198	BP	GO:0070198	protein localization to chromosome, telomeric region	10/486	30/18800	2.29637e-09	1.76486e-07	1.55559e-07	CCT6A/CCT5/XRCC5/CCT2/DKC1/CCT3/CCT8/TCP1/GNL3/CCT4	10
GO:0070200	BP	GO:0070200	establishment of protein localization to telomere	8/486	17/18800	3.73085e-09	2.80879e-07	2.47574e-07	CCT6A/CCT5/CCT2/DKC1/CCT3/CCT8/TCP1/CCT4	8
GO:1904356	BP	GO:1904356	regulation of telomere maintenance via telomere lengthening	13/486	61/18800	4.15735e-09	3.06729e-07	2.70359e-07	CCT6A/CCT5/XRCC5/HNRNPA2B1/HNRNPU/CCT2/PARP1/DKC1/CCT3/CCT8/TCP1/HNRNPC/CCT4	13
GO:0140694	BP	GO:0140694	non-membrane-bounded organelle assembly	32/486	379/18800	4.74515e-09	3.43233e-07	3.02534e-07	KRT19/NPM1/CENPF/RPS23/C1QBP/TPX2/XRCC5/CENPW/PRKDC/RPS19/SMC1A/RPS3/HNRNPU/PRRC2C/RPL38/KPNB1/RPSA/ACTG1/SMC3/ITGB1/MRTO4/CENPX/MRPL20/TUBB/LSM4/RPF2/RPL6/RPL5/BRIX1/DDX3X/MRPS2/EZR	32
GO:0042274	BP	GO:0042274	ribosomal small subunit biogenesis	14/486	74/18800	5.45164e-09	3.7491e-07	3.30455e-07	RPS21/RPS24/NPM1/RPS17/XRCC5/PRKDC/RPS19/RPL38/RPSA/WDR43/NOB1/SNU13/UTP4/LSM6	14
GO:0050657	BP	GO:0050657	nucleic acid transport	20/486	159/18800	5.48798e-09	3.7491e-07	3.30455e-07	EIF5A/NPM1/YBX1/ALYREF/HNRNPA2B1/DDX39B/THOC2/HNRNPA3/KPNB1/XPO1/RAN/SRSF7/SSB/SRSF1/SRSF3/LRPPRC/UPF3A/NUTF2/TOMM20/MRPL18	20
GO:0050658	BP	GO:0050658	RNA transport	20/486	159/18800	5.48798e-09	3.7491e-07	3.30455e-07	EIF5A/NPM1/YBX1/ALYREF/HNRNPA2B1/DDX39B/THOC2/HNRNPA3/KPNB1/XPO1/RAN/SRSF7/SSB/SRSF1/SRSF3/LRPPRC/UPF3A/NUTF2/TOMM20/MRPL18	20
GO:0032206	BP	GO:0032206	positive regulation of telomere maintenance	12/486	52/18800	6.27966e-09	4.21194e-07	3.71251e-07	CCT6A/CCT5/XRCC5/HNRNPD/HNRNPA2B1/CCT2/DKC1/CCT3/CCT8/TCP1/GNL3/CCT4	12
GO:0051236	BP	GO:0051236	establishment of RNA localization	20/486	162/18800	7.60571e-09	4.93813e-07	4.3526e-07	EIF5A/NPM1/YBX1/ALYREF/HNRNPA2B1/DDX39B/THOC2/HNRNPA3/KPNB1/XPO1/RAN/SRSF7/SSB/SRSF1/SRSF3/LRPPRC/UPF3A/NUTF2/TOMM20/MRPL18	20
GO:0051052	BP	GO:0051052	regulation of DNA metabolic process	36/486	472/18800	7.63008e-09	4.93813e-07	4.3526e-07	HSP90AA1/HSP90AB1/HMGB1/NPM1/CCT6A/CCT5/XRCC5/HNRNPD/PRKDC/ALYREF/CDK1/HNRNPA2B1/RPS3/HNRNPU/DEK/PTGES3/UBE2V1/CCT2/PARP1/PCNA/SMC3/DKC1/FUS/TRIM28/CCT3/KPNA2/STOML2/CCT8/SMARCA5/TCP1/NUCKS1/HNRNPC/RUVBL1/GNL3/CCT4/SSBP1	36
GO:0072594	BP	GO:0072594	establishment of protein localization to organelle	34/486	431/18800	8.72124e-09	5.54701e-07	4.88927e-07	HSP90AA1/HSP90AB1/CCT6A/HSPD1/CCT5/CDK1/PAM16/HSPA5/KPNB1/TOMM40/CCT2/RAN/TOMM5/NOLC1/PHB2/DKC1/LMAN1/TRIM28/CCT3/KPNA2/CCT8/SRP19/TCP1/LMNA/PDCD5/HSPA4/NUTF2/LAMP1/GCC2/SRP72/SPCS2/NMT1/TOMM20/CCT4	34
GO:2000278	BP	GO:2000278	regulation of DNA biosynthetic process	17/486	119/18800	1.11967e-08	7.00076e-07	6.17065e-07	HSP90AA1/HSP90AB1/CCT6A/CCT5/XRCC5/HNRNPD/HNRNPA2B1/HNRNPU/PTGES3/CCT2/PCNA/DKC1/CCT3/CCT8/TCP1/HNRNPC/CCT4	17
GO:1904358	BP	GO:1904358	positive regulation of telomere maintenance via telomere lengthening	10/486	37/18800	2.26301e-08	1.39138e-06	1.22639e-06	CCT6A/CCT5/XRCC5/HNRNPA2B1/CCT2/DKC1/CCT3/CCT8/TCP1/CCT4	10
GO:0050821	BP	GO:0050821	protein stabilization	21/486	191/18800	2.56586e-08	1.55171e-06	1.36772e-06	HSP90AA1/HSP90AB1/CCT6A/HSPD1/CCT5/PPIB/CALR/PTGES3/CCT2/PHB2/CCT3/TAF9/CCT8/RPL5/TCP1/TRIM44/ATP1B1/LAMP1/SUGT1/CDC37/CCT4	21
GO:2000573	BP	GO:2000573	positive regulation of DNA biosynthetic process	13/486	73/18800	4.11753e-08	2.44993e-06	2.15943e-06	HSP90AA1/HSP90AB1/CCT6A/CCT5/XRCC5/PTGES3/CCT2/PCNA/DKC1/CCT3/CCT8/TCP1/CCT4	13
GO:1903311	BP	GO:1903311	regulation of mRNA metabolic process	26/486	294/18800	5.36456e-08	3.14125e-06	2.76878e-06	NCL/NPM1/YBX1/C1QBP/HNRNPD/SERBP1/HNRNPAB/HNRNPA2B1/HNRNPU/RBM25/HNRNPM/DDX5/SRSF7/FUS/APEX1/HNRNPK/WTAP/PAPOLA/TRA2B/SON/SRSF3/EIF4A3/RBM8A/HNRNPC/RBM39/SRSF10	26
GO:0046700	BP	GO:0046700	heterocycle catabolic process	33/486	443/18800	5.74293e-08	3.31026e-06	2.91775e-06	NPM1/YBX1/HNRNPD/KCNQ1OT1/SERBP1/HNRNPAB/HNRNPU/HNRNPM/DDX5/LSM7/MRTO4/DKC1/FUS/APEX1/SSB/NUDT5/NT5C/LSM4/NFE2L2/ITPA/DCTPP1/LRPPRC/UPF3A/LSM6/DPEP1/XRN2/LSM2/EIF4A3/NUDT4/RBM8A/DUT/HNRNPC/LSM5	33
GO:0048024	BP	GO:0048024	regulation of mRNA splicing, via spliceosome	15/486	103/18800	6.29214e-08	3.57103e-06	3.1476e-06	NCL/C1QBP/HNRNPA2B1/HNRNPU/RBM25/DDX5/SRSF7/HNRNPK/WTAP/TRA2B/SON/SRSF3/RBM8A/RBM39/SRSF10	15
GO:0034655	BP	GO:0034655	nucleobase-containing compound catabolic process	31/486	405/18800	7.96059e-08	4.3688e-06	3.85077e-06	NPM1/YBX1/HNRNPD/KCNQ1OT1/SERBP1/HNRNPAB/HNRNPU/HNRNPM/DDX5/LSM7/MRTO4/DKC1/FUS/APEX1/SSB/NUDT5/NT5C/LSM4/ITPA/DCTPP1/LRPPRC/UPF3A/LSM6/XRN2/LSM2/EIF4A3/NUDT4/RBM8A/DUT/HNRNPC/LSM5	31
GO:0031647	BP	GO:0031647	regulation of protein stability	26/486	300/18800	8.04433e-08	4.3688e-06	3.85077e-06	HSP90AA1/HSP90AB1/CCT6A/HSPD1/CCT5/CD81/PRKDC/PPIB/CALR/PTGES3/CCT2/PHB2/CCT3/TAF9/CCT8/RPL5/TCP1/TRIM44/LMNA/ATP1B1/RAD23A/LAMP1/SUGT1/CDC37/KRAS/CCT4	26
GO:0006401	BP	GO:0006401	RNA catabolic process	25/486	280/18800	8.05309e-08	4.3688e-06	3.85077e-06	NPM1/YBX1/HNRNPD/KCNQ1OT1/SERBP1/HNRNPAB/HNRNPU/HNRNPM/DDX5/LSM7/MRTO4/DKC1/FUS/APEX1/SSB/LSM4/LRPPRC/UPF3A/LSM6/XRN2/LSM2/EIF4A3/RBM8A/HNRNPC/LSM5	25
GO:0032210	BP	GO:0032210	regulation of telomere maintenance via telomerase	11/486	53/18800	8.80125e-08	4.70548e-06	4.14753e-06	CCT6A/CCT5/XRCC5/HNRNPU/CCT2/DKC1/CCT3/CCT8/TCP1/HNRNPC/CCT4	11
GO:0006338	BP	GO:0006338	chromatin remodeling	24/486	266/18800	1.20508e-07	6.35075e-06	5.59772e-06	HMGA1/NPM1/CENPW/SET/NASP/SUPT16H/ANP32B/HMGB2/SSRP1/CENPV/CHD4/CBX3/NUDT5/SMARCC1/HP1BP3/SMARCA5/ANP32E/NPM3/RBBP4/RBBP7/TOP1/HNRNPC/RUVBL1/NAP1L1	24
GO:0032212	BP	GO:0032212	positive regulation of telomere maintenance via telomerase	9/486	34/18800	1.4132e-07	7.34265e-06	6.472e-06	CCT6A/CCT5/XRCC5/CCT2/DKC1/CCT3/CCT8/TCP1/CCT4	9
GO:0045727	BP	GO:0045727	positive regulation of translation	17/486	141/18800	1.44275e-07	7.39207e-06	6.51556e-06	EIF5A/NPM1/YBX1/C1QBP/HNRNPD/PRKDC/HNRNPU/PKM/RPL26/EIF4G1/RPL5/DDX3X/UPF3A/EIF4A3/EIF4G2/METTL5/EIF2S3	17
GO:0006446	BP	GO:0006446	regulation of translational initiation	13/486	81/18800	1.48426e-07	7.50059e-06	6.61121e-06	NPM1/EIF4B/BZW2/EIF4G1/DDX3X/TMED2/DDX1/EIF4H/EIF5/EIF5B/EIF4G2/EIF2AK1/BZW1	13
GO:0071897	BP	GO:0071897	DNA biosynthetic process	20/486	194/18800	1.60729e-07	8.01253e-06	7.06245e-06	HSP90AA1/HSP90AB1/CCT6A/CENPF/CCT5/XRCC5/HNRNPD/HNRNPA2B1/HNRNPU/PTGES3/CCT2/PCNA/DKC1/NHP2/CCT3/CCT8/TCP1/HNRNPC/RFC1/CCT4	20
GO:0006402	BP	GO:0006402	mRNA catabolic process	22/486	233/18800	1.84349e-07	9.06753e-06	7.99235e-06	NPM1/YBX1/HNRNPD/SERBP1/HNRNPAB/HNRNPU/HNRNPM/DDX5/LSM7/MRTO4/FUS/APEX1/SSB/LSM4/UPF3A/LSM6/XRN2/LSM2/EIF4A3/RBM8A/HNRNPC/LSM5	22
GO:0070199	BP	GO:0070199	establishment of protein localization to chromosome	8/486	26/18800	1.95291e-07	9.47933e-06	8.35533e-06	CCT6A/CCT5/CCT2/DKC1/CCT3/CCT8/TCP1/CCT4	8
GO:0034504	BP	GO:0034504	protein localization to nucleus	25/486	294/18800	2.05947e-07	9.86674e-06	8.69679e-06	HSP90AB1/CCT6A/CCT5/CDK1/CALR/HNRNPU/KPNB1/CCT2/XPO1/PARP1/RAN/NOLC1/PHB2/DKC1/TRIM28/CCT3/YWHAE/KPNA2/RPF2/CCT8/TCP1/LMNA/NUTF2/HDGF/CCT4	25
GO:1900182	BP	GO:1900182	positive regulation of protein localization to nucleus	13/486	84/18800	2.3059e-07	1.09057e-05	9.61259e-06	HSP90AB1/CCT6A/CCT5/CDK1/CCT2/PARP1/RAN/DKC1/TRIM28/CCT3/CCT8/TCP1/CCT4	13
GO:0044270	BP	GO:0044270	cellular nitrogen compound catabolic process	32/486	449/18800	2.49763e-07	1.1663e-05	1.028e-05	NPM1/YBX1/HNRNPD/KCNQ1OT1/SERBP1/HNRNPAB/HNRNPU/HNRNPM/DDX5/LSM7/MRTO4/DKC1/FUS/APEX1/SSB/NUDT5/NT5C/LSM4/ITPA/DCTPP1/LRPPRC/UPF3A/LSM6/DPEP1/XRN2/LSM2/EIF4A3/NUDT4/RBM8A/DUT/HNRNPC/LSM5	32
GO:0051972	BP	GO:0051972	regulation of telomerase activity	10/486	47/18800	2.66802e-07	1.23029e-05	1.08441e-05	HSP90AA1/HSP90AB1/XRCC5/HNRNPD/HNRNPA2B1/PTGES3/CCT2/DKC1/TCP1/CCT4	10
GO:0034250	BP	GO:0034250	positive regulation of cellular amide metabolic process	18/486	167/18800	3.44223e-07	1.5677e-05	1.38181e-05	EIF5A/NPM1/YBX1/C1QBP/HNRNPD/PRKDC/HNRNPU/PKM/RPL26/EIF4G1/NFE2L2/RPL5/DDX3X/UPF3A/EIF4A3/EIF4G2/METTL5/EIF2S3	18
GO:0006913	BP	GO:0006913	nucleocytoplasmic transport	25/486	308/18800	4.95135e-07	2.20067e-05	1.93972e-05	HSP90AB1/NPM1/ALYREF/CDK1/HNRNPA2B1/CALR/DDX39B/THOC2/KPNB1/ANP32B/XPO1/RAN/NOLC1/PHB2/TRIM28/SSB/YWHAE/KPNA2/PPP1CC/SRSF3/LMNA/HSPA9/UPF3A/NUTF2/ABCE1	25
GO:0051169	BP	GO:0051169	nuclear transport	25/486	308/18800	4.95135e-07	2.20067e-05	1.93972e-05	HSP90AB1/NPM1/ALYREF/CDK1/HNRNPA2B1/CALR/DDX39B/THOC2/KPNB1/ANP32B/XPO1/RAN/NOLC1/PHB2/TRIM28/SSB/YWHAE/KPNA2/PPP1CC/SRSF3/LMNA/HSPA9/UPF3A/NUTF2/ABCE1	25
GO:0016032	BP	GO:0016032	viral process	30/486	418/18800	5.14505e-07	2.25954e-05	1.99161e-05	HSP90AB1/RNASEK/TOP2A/CD81/PPIB/CDK1/SLC1A5/DEK/EIF3A/RPSA/CD46/SIVA1/RAN/ITGB1/LGALS1/EIF3F/TRIM28/SSB/BANF1/KPNA2/SLC3A2/PPIA/ILF3/BSG/DDX3X/RAD23A/NUCKS1/LAMP1/PRMT1/CANX	30
GO:0050684	BP	GO:0050684	regulation of mRNA processing	16/486	139/18800	6.34365e-07	2.75314e-05	2.42669e-05	NCL/C1QBP/HNRNPA2B1/HNRNPU/RBM25/DDX5/SRSF7/HNRNPK/WTAP/PAPOLA/TRA2B/SON/SRSF3/RBM8A/RBM39/SRSF10	16
GO:0006458	BP	GO:0006458	'de novo' protein folding	9/486	41/18800	8.03674e-07	3.44739e-05	3.03862e-05	HSPD1/HSPH1/HSPA5/PTGES3/CCT2/SDF2L1/HSPE1/DNAJC7/HSPA9	9
GO:0071824	BP	GO:0071824	protein-DNA complex subunit organization	21/486	237/18800	9.99111e-07	4.23646e-05	3.73412e-05	HMGB1/HMGA1/NPM1/CENPF/CENPW/SET/NASP/SUPT16H/ANP32B/HMGB2/SSRP1/CENPV/CENPX/TAF9/TAF10/SMARCC1/HP1BP3/GTF2A2/SMARCA5/ANP32E/NAP1L1	21
GO:0015931	BP	GO:0015931	nucleobase-containing compound transport	20/486	218/18800	1.04898e-06	4.39738e-05	3.87596e-05	EIF5A/NPM1/YBX1/ALYREF/HNRNPA2B1/DDX39B/THOC2/HNRNPA3/KPNB1/XPO1/RAN/SRSF7/SSB/SRSF1/SRSF3/LRPPRC/UPF3A/NUTF2/TOMM20/MRPL18	20
GO:0006260	BP	GO:0006260	DNA replication	23/486	280/18800	1.15516e-06	4.78808e-05	4.22034e-05	HMGA1/SET/NASP/ALYREF/CDK1/SUPT16H/SSRP1/DDX21/PCNA/SMC3/CENPX/STOML2/SMARCA5/NUCKS1/RBBP4/RBBP7/TOP1/DUT/RUVBL1/RFC1/NAP1L1/PTMS/SSBP1	23
GO:0051131	BP	GO:0051131	chaperone-mediated protein complex assembly	7/486	23/18800	1.26499e-06	5.18503e-05	4.57022e-05	HSP90AA1/HSP90AB1/HSPD1/PTGES3/CCT2/HSPA4/PSMG3	7
GO:1900180	BP	GO:1900180	regulation of protein localization to nucleus	15/486	132/18800	1.6724e-06	6.71677e-05	5.92034e-05	HSP90AB1/CCT6A/CCT5/CDK1/CCT2/PARP1/RAN/NOLC1/DKC1/TRIM28/CCT3/CCT8/TCP1/LMNA/CCT4	15
GO:0019439	BP	GO:0019439	aromatic compound catabolic process	31/486	466/18800	1.6751e-06	6.71677e-05	5.92034e-05	NPM1/YBX1/HNRNPD/KCNQ1OT1/SERBP1/HNRNPAB/HNRNPU/HNRNPM/DDX5/LSM7/MRTO4/DKC1/FUS/APEX1/SSB/NUDT5/NT5C/LSM4/ITPA/DCTPP1/LRPPRC/UPF3A/LSM6/XRN2/LSM2/EIF4A3/NUDT4/RBM8A/DUT/HNRNPC/LSM5	31
GO:0051973	BP	GO:0051973	positive regulation of telomerase activity	8/486	34/18800	1.89204e-06	7.50511e-05	6.61519e-05	HSP90AA1/HSP90AB1/XRCC5/PTGES3/CCT2/DKC1/TCP1/CCT4	8
GO:1901361	BP	GO:1901361	organic cyclic compound catabolic process	32/486	494/18800	2.00784e-06	7.87972e-05	6.94539e-05	NPM1/YBX1/HNRNPD/KCNQ1OT1/SERBP1/HNRNPAB/HNRNPU/HNRNPM/DDX5/LSM7/MRTO4/DKC1/FUS/APEX1/SSB/NUDT5/NT5C/LSM4/NFE2L2/ITPA/DCTPP1/LRPPRC/UPF3A/LSM6/XRN2/LSM2/EIF4A3/NUDT4/RBM8A/DUT/HNRNPC/LSM5	32
GO:0033119	BP	GO:0033119	negative regulation of RNA splicing	7/486	25/18800	2.37155e-06	9.20908e-05	8.11712e-05	C1QBP/RPS26/HNRNPA2B1/SRSF7/HNRNPK/RPS13/SRSF10	7
GO:0019058	BP	GO:0019058	viral life cycle	24/486	317/18800	2.86104e-06	0.000109941	9.69051e-05	HSP90AB1/RNASEK/TOP2A/CD81/PPIB/CDK1/SLC1A5/DEK/RPSA/CD46/SIVA1/ITGB1/LGALS1/TRIM28/BANF1/KPNA2/SLC3A2/PPIA/ILF3/BSG/DDX3X/RAD23A/NUCKS1/LAMP1	24
GO:0051084	BP	GO:0051084	'de novo' post-translational protein folding	8/486	37/18800	3.75834e-06	0.000142933	0.000125985	HSPH1/HSPA5/PTGES3/CCT2/SDF2L1/HSPE1/DNAJC7/HSPA9	8
GO:0000027	BP	GO:0000027	ribosomal large subunit assembly	7/486	27/18800	4.18904e-06	0.000157687	0.00013899	RPL38/MRTO4/MRPL20/RPF2/RPL6/RPL5/BRIX1	7
GO:0007059	BP	GO:0007059	chromosome segregation	25/486	348/18800	4.53199e-06	0.000167802	0.000147905	CIAO2B/CENPF/TOP2A/CCNB1/MKI67/CENPW/UBE2C/PTTG1/SMC1A/RPS3/HNRNPU/KPNB1/RAN/PHB2/SMC3/SFPQ/CENPX/BANF1/SMARCA5/ANAPC15/NUDC/DDX3X/NTMT1/TOP1/NAA50	25
GO:0001731	BP	GO:0001731	formation of translation preinitiation complex	5/486	11/18800	4.59421e-06	0.000167802	0.000147905	EIF4B/EIF4H/EIF5/EIF2S2/EIF2S3	5
GO:0034975	BP	GO:0034975	protein folding in endoplasmic reticulum	5/486	11/18800	4.59421e-06	0.000167802	0.000147905	HSP90B1/CALR/HSPA5/PDIA3/CANX	5
GO:0000387	BP	GO:0000387	spliceosomal snRNP assembly	9/486	50/18800	4.67527e-06	0.000169089	0.000149039	SNRPB/PRPF8/SNRPG/LSM4/SNRPE/SNRPD1/SNRPF/LSM2/SRSF10	9
GO:0000245	BP	GO:0000245	spliceosomal complex assembly	11/486	79/18800	5.69728e-06	0.000204051	0.000179856	DDX39B/SNRPG/SNRPE/SNRPD1/SRSF1/LUC7L3/LUC7L2/SCAF11/DDX1/SF3B1/SRSF10	11
GO:2001242	BP	GO:2001242	regulation of intrinsic apoptotic signaling pathway	16/486	171/18800	9.7389e-06	0.00034545	0.000304488	EIF5A/RPS3/MIF/PARP1/RPL26/BCLAF1/SFPQ/HNRNPK/TAF9/PPIA/NFE2L2/DDX3X/TRAP1/NONO/VDAC2/URI1	16
GO:0051701	BP	GO:0051701	biological process involved in interaction with host	17/486	191/18800	1.00628e-05	0.000353539	0.000311618	RNASEK/CD81/ALYREF/CDK1/SLC1A5/DDX39B/THOC2/RPSA/CD46/SIVA1/ITGB1/LGALS1/SLC3A2/PPIA/BSG/TCP1/LAMP1	17
GO:0009988	BP	GO:0009988	cell-cell recognition	10/486	69/18800	1.05366e-05	0.000366693	0.000323212	CCT5/CD9/CD81/LGALS3/CCT2/CCT3/CCT8/TCP1/VDAC2/CCT4	10
GO:0032069	BP	GO:0032069	regulation of nuclease activity	6/486	21/18800	1.12854e-05	0.000389083	0.000342947	HMGB1/NPM1/RPS3/HMGB2/PCNA/ABCE1	6
GO:0051168	BP	GO:0051168	nuclear export	15/486	156/18800	1.32665e-05	0.00045315	0.000399418	NPM1/ALYREF/HNRNPA2B1/CALR/DDX39B/THOC2/ANP32B/XPO1/RAN/SSB/YWHAE/SRSF3/HSPA9/NUTF2/ABCE1	15
GO:0071103	BP	GO:0071103	DNA conformation change	12/486	103/18800	1.41108e-05	0.000476083	0.000419632	HMGB1/HMGA1/TOP2A/XRCC5/HNRNPA2B1/HMGB2/CHD4/DDX3X/DDX1/TOP1/RUVBL1/SSBP1	12
GO:0051085	BP	GO:0051085	chaperone cofactor-dependent protein refolding	7/486	32/18800	1.4196e-05	0.000476083	0.000419632	HSPH1/HSPA5/PTGES3/SDF2L1/HSPE1/DNAJC7/HSPA9	7
GO:0000956	BP	GO:0000956	nuclear-transcribed mRNA catabolic process	13/486	121/18800	1.51777e-05	0.000504421	0.000444609	YBX1/HNRNPD/HNRNPAB/HNRNPU/DDX5/LSM7/MRTO4/SSB/LSM4/UPF3A/XRN2/EIF4A3/RBM8A	13
GO:0010498	BP	GO:0010498	proteasomal protein catabolic process	30/486	496/18800	1.59908e-05	0.000526696	0.000464243	HSP90AB1/UBE2S/HSP90B1/UBE2C/CALR/HSPA5/PSMA6/XPO1/GABARAP/PSMD7/PSMA3/PSMD1/SDF2L1/PSMD8/PSMB2/PSMA5/PSMD6/TAF9/SMARCC1/NFE2L2/PSMA1/PSMA7/RAD23A/PSMF1/PSMA2/UFD1/UBE2K/UBXN4/PSMD2/CANX	30
GO:0044403	BP	GO:0044403	biological process involved in symbiotic interaction	21/486	286/18800	1.88849e-05	0.000616518	0.000543415	HSP90AB1/RNASEK/HSPD1/CD81/PPIB/ALYREF/CDK1/SLC1A5/DDX39B/THOC2/RPSA/CD46/SIVA1/ITGB1/LGALS1/SLC3A2/PPIA/BSG/TCP1/NUCKS1/LAMP1	21
GO:0051028	BP	GO:0051028	mRNA transport	13/486	126/18800	2.34918e-05	0.000760188	0.000670049	EIF5A/ALYREF/HNRNPA2B1/DDX39B/THOC2/HNRNPA3/XPO1/SRSF7/SRSF1/SRSF3/LRPPRC/UPF3A/NUTF2	13
GO:0140014	BP	GO:0140014	mitotic nuclear division	21/486	293/18800	2.70573e-05	0.000867952	0.000765035	UBE2S/CENPF/CCNB1/MKI67/TPX2/UBE2C/PTTG1/KIF20B/SMC1A/HNRNPU/RANBP1/KPNB1/RAN/PHB2/SMC3/BANF1/SMARCA5/ANAPC15/NUDC/EPS8/NAA50	21
GO:0034502	BP	GO:0034502	protein localization to chromosome	11/486	93/18800	2.77745e-05	0.000883278	0.000778544	CCT6A/CCT5/XRCC5/CDK1/CCT2/DKC1/CCT3/CCT8/TCP1/GNL3/CCT4	11
GO:0006605	BP	GO:0006605	protein targeting	22/486	317/18800	2.86676e-05	0.000903887	0.000796709	HSP90AA1/HSPD1/PAM16/HSPA5/TOMM40/YWHAB/GABARAP/TOMM5/NACA/LMAN1/YWHAE/YWHAZ/SSR2/SRP19/PDCD5/HSPA4/GCC2/SRP72/SPCS2/CDC37/TOMM20/ARL6IP1	22
GO:1903312	BP	GO:1903312	negative regulation of mRNA metabolic process	11/486	94/18800	3.0735e-05	0.00096086	0.000846927	YBX1/C1QBP/HNRNPD/HNRNPAB/HNRNPA2B1/HNRNPU/SRSF7/FUS/HNRNPK/HNRNPC/SRSF10	11
GO:0035036	BP	GO:0035036	sperm-egg recognition	8/486	49/18800	3.34484e-05	0.0010369	0.000913951	CCT5/CD9/CCT2/CCT3/CCT8/TCP1/VDAC2/CCT4	8
GO:0017038	BP	GO:0017038	protein import	17/486	210/18800	3.44533e-05	0.00105915	0.000933562	HSP90AA1/HSP90AB1/HSPD1/CDK1/PAM16/KPNB1/TOMM40/RAN/NOLC1/PHB2/TRIM28/KPNA2/LMNA/PDCD5/HSPA4/NUTF2/TOMM20	17
GO:0032392	BP	GO:0032392	DNA geometric change	11/486	96/18800	3.74809e-05	0.0011427	0.00100721	HMGB1/HMGA1/TOP2A/XRCC5/HNRNPA2B1/HMGB2/CHD4/DDX3X/DDX1/RUVBL1/SSBP1	11
GO:1990830	BP	GO:1990830	cellular response to leukemia inhibitory factor	11/486	99/18800	4.99775e-05	0.0015112	0.00133201	NCL/XRCC5/HNRNPU/BCLAF1/SRSF7/SMARCA5/SRSF3/EPS8/SRM/MAT2A/CACYBP	11
GO:1990823	BP	GO:1990823	response to leukemia inhibitory factor	11/486	100/18800	5.48696e-05	0.00164564	0.00145051	NCL/XRCC5/HNRNPU/BCLAF1/SRSF7/SMARCA5/SRSF3/EPS8/SRM/MAT2A/CACYBP	11
GO:1901998	BP	GO:1901998	toxin transport	7/486	39/18800	5.54803e-05	0.00165054	0.00145483	CCT5/HSPA5/CCT2/CCT3/CCT8/TCP1/CCT4	7
GO:0000470	BP	GO:0000470	maturation of LSU-rRNA	6/486	28/18800	6.71881e-05	0.00198286	0.00174774	RPL7A/NHP2/SNU13/RPF2/NIFK/NSA2	6
GO:0034728	BP	GO:0034728	nucleosome organization	14/486	159/18800	6.78769e-05	0.00198728	0.00175164	HMGA1/NPM1/CENPW/SET/NASP/SUPT16H/ANP32B/HMGB2/SSRP1/SMARCC1/HP1BP3/SMARCA5/ANP32E/NAP1L1	14
GO:0035966	BP	GO:0035966	response to topologically incorrect protein	14/486	160/18800	7.26625e-05	0.00211065	0.00186038	HSP90AA1/HSP90AB1/HSPD1/HSPH1/HSPA5/SDF2L1/CCND1/HSPE1/NFE2L2/HSPA9/HSPA4/UFD1/TMED2/UBXN4	14
GO:2001020	BP	GO:2001020	regulation of response to DNA damage stimulus	18/486	246/18800	7.7004e-05	0.00221787	0.00195489	HMGB1/PRKDC/RPS3/DDX39B/DEK/IER3/UBE2V1/MIF/PARP1/RPL26/PCNA/DDX5/BCLAF1/FUS/TRIM28/HNRNPK/TAF9/RUVBL1	18
GO:0007339	BP	GO:0007339	binding of sperm to zona pellucida	7/486	41/18800	7.75564e-05	0.00221787	0.00195489	CCT5/CCT2/CCT3/CCT8/TCP1/VDAC2/CCT4	7
GO:0140053	BP	GO:0140053	mitochondrial gene expression	11/486	104/18800	7.87731e-05	0.00223534	0.00197028	MRPS24/C1QBP/MRPS17/TFAM/MRPL12/MRPS12/LRPPRC/MALSU1/MRPS2/NDUFA7/MRPS34	11
GO:0065004	BP	GO:0065004	protein-DNA complex assembly	16/486	203/18800	8.00623e-05	0.00225458	0.00198724	HMGB1/NPM1/CENPF/CENPW/SET/NASP/ANP32B/HMGB2/CENPV/CENPX/TAF9/TAF10/HP1BP3/GTF2A2/SMARCA5/NAP1L1	16
GO:0032070	BP	GO:0032070	regulation of deoxyribonuclease activity	4/486	10/18800	8.1846e-05	0.00228735	0.00201613	HMGB1/NPM1/RPS3/PCNA	4
GO:1902175	BP	GO:1902175	regulation of oxidative stress-induced intrinsic apoptotic signaling pathway	6/486	29/18800	8.28789e-05	0.0022988	0.00202622	PARP1/SFPQ/PPIA/NFE2L2/TRAP1/NONO	6
GO:0000819	BP	GO:0000819	sister chromatid segregation	16/486	205/18800	8.98928e-05	0.00247473	0.00218129	CENPF/TOP2A/CCNB1/UBE2C/PTTG1/SMC1A/HNRNPU/KPNB1/RAN/PHB2/SMC3/SFPQ/SMARCA5/ANAPC15/NUDC/NAA50	16
GO:0032543	BP	GO:0032543	mitochondrial translation	9/486	72/18800	9.60605e-05	0.00262294	0.00231193	MRPS24/C1QBP/MRPS17/MRPS12/LRPPRC/MALSU1/MRPS2/NDUFA7/MRPS34	9
GO:0000028	BP	GO:0000028	ribosomal small subunit assembly	5/486	19/18800	9.74093e-05	0.00262294	0.00231193	XRCC5/PRKDC/RPS19/RPL38/RPSA	5
GO:0006337	BP	GO:0006337	nucleosome disassembly	5/486	19/18800	9.74093e-05	0.00262294	0.00231193	HMGA1/SET/SUPT16H/SSRP1/SMARCC1	5
GO:1903829	BP	GO:1903829	positive regulation of protein localization	26/486	446/18800	0.000106854	0.00285641	0.00251771	HSP90AB1/CCT6A/CCT5/CD81/KIF20B/CDK1/LGALS3/ANP32B/CCT2/PARP1/RAN/ITGB1/DKC1/TRIM28/CCT3/YWHAE/PPIA/CCT8/PGRMC1/TCP1/PDCD5/EZR/KIF5B/NMT1/GNL3/CCT4	26
GO:0045088	BP	GO:0045088	regulation of innate immune response	17/486	231/18800	0.000112808	0.00299386	0.00263887	HSP90AA1/HSP90AB1/HMGB1/LYAR/XRCC5/PRKDC/RPS19/HMGB2/SFPQ/BANF1/HLA-A/NFE2L2/LAMP1/NONO/UBE2K/CDC37/PAK2	17
GO:0043555	BP	GO:0043555	regulation of translation in response to stress	5/486	20/18800	0.000127132	0.00332618	0.00293178	NPM1/EIF4G1/DDX3X/TMED2/EIF2AK1	5
GO:0048025	BP	GO:0048025	negative regulation of mRNA splicing, via spliceosome	5/486	20/18800	0.000127132	0.00332618	0.00293178	C1QBP/HNRNPA2B1/SRSF7/HNRNPK/SRSF10	5
GO:0002831	BP	GO:0002831	regulation of response to biotic stimulus	22/486	351/18800	0.000129229	0.00335723	0.00295915	HSP90AA1/HSP90AB1/HMGB1/HSPD1/C1QBP/LYAR/XRCC5/PRKDC/RPS19/HMGB2/MIF/SFPQ/BANF1/HLA-A/NFE2L2/TRIM44/LAMP1/UFD1/NONO/UBE2K/CDC37/PAK2	22
GO:0031396	BP	GO:0031396	regulation of protein ubiquitination	16/486	213/18800	0.000140589	0.00362681	0.00319676	HSP90AA1/RPS2/HSP90AB1/UBE2S/RPL37/UBE2C/RPS3/HSPA5/UBE2V1/GABARAP/CENPX/PPIA/RPL5/TRIM44/DDX3X/PDCD6	16
GO:0009141	BP	GO:0009141	nucleoside triphosphate metabolic process	11/486	111/18800	0.000142168	0.00364207	0.00321022	NME2/TMSB4X/ATP6V0C/PARP1/RAN/NME1/STOML2/ITPA/DCTPP1/UQCC3/DUT	11
GO:0000380	BP	GO:0000380	alternative mRNA splicing, via spliceosome	9/486	77/18800	0.000162473	0.00412699	0.00363764	HNRNPU/RBM25/HNRNPM/DDX5/SFPQ/WTAP/SRSF1/TRA2B/RBM8A	9
GO:0032986	BP	GO:0032986	protein-DNA complex disassembly	5/486	21/18800	0.000163334	0.00412699	0.00363764	HMGA1/SET/SUPT16H/SSRP1/SMARCC1	5
GO:1904951	BP	GO:1904951	positive regulation of establishment of protein localization	20/486	309/18800	0.000169287	0.0042483	0.00374456	HSP90AB1/CCT6A/CCT5/CD81/KIF20B/CDK1/ANP32B/CCT2/RAN/DKC1/TRIM28/CCT3/YWHAE/PPIA/CCT8/TCP1/PDCD5/EZR/NMT1/CCT4	20
GO:0031330	BP	GO:0031330	negative regulation of cellular catabolic process	18/486	265/18800	0.000196447	0.00489658	0.00431597	HSP90AB1/YBX1/HNRNPD/HNRNPAB/HNRNPU/TIMP1/DKC1/ANXA2/FUS/EIF4G1/TAF9/SMARCC1/ATRAID/RPL5/LRPPRC/PSMF1/EIF4G2/HNRNPC	18
GO:0007006	BP	GO:0007006	mitochondrial membrane organization	11/486	117/18800	0.000226937	0.0056186	0.00495237	HSP90AA1/MICOS10/MICOS13/PDCD5/HSPA9/HSPA4/UQCC3/CHCHD3/NMT1/VDAC2/IMMT	11
GO:1903320	BP	GO:1903320	regulation of protein modification by small protein conjugation or removal	17/486	246/18800	0.000239602	0.0058926	0.00519389	HSP90AA1/RPS2/HSP90AB1/UBE2S/RPL37/UBE2C/RPS3/HSPA5/UBE2V1/GABARAP/CENPX/PPIA/RPL5/TRIM44/DDX3X/GNL3/PDCD6	17
GO:0097193	BP	GO:0097193	intrinsic apoptotic signaling pathway	19/486	295/18800	0.000260305	0.00635937	0.00560532	EIF5A/PRKDC/PERP/RPS3/MIF/PARP1/RPL26/DDX5/BCLAF1/SFPQ/HNRNPK/TAF9/PPIA/NFE2L2/DDX3X/TRAP1/NONO/VDAC2/URI1	19
GO:0009205	BP	GO:0009205	purine ribonucleoside triphosphate metabolic process	9/486	82/18800	0.000263409	0.00639287	0.00563484	NME2/TMSB4X/ATP6V0C/PARP1/RAN/NME1/STOML2/ITPA/UQCC3	9
GO:0006986	BP	GO:0006986	response to unfolded protein	12/486	139/18800	0.000266238	0.0064193	0.00565813	HSP90AA1/HSP90AB1/HSPD1/HSPH1/HSPA5/CCND1/HSPE1/NFE2L2/HSPA9/HSPA4/TMED2/UBXN4	12
GO:0030490	BP	GO:0030490	maturation of SSU-rRNA	7/486	51/18800	0.000319713	0.00765858	0.00675047	RPS21/RPS19/WDR43/NOB1/SNU13/UTP4/LSM6	7
GO:0000054	BP	GO:0000054	ribosomal subunit export from nucleus	4/486	14/18800	0.00035928	0.00838851	0.00739385	NPM1/XPO1/RAN/ABCE1	4
GO:0033750	BP	GO:0033750	ribosome localization	4/486	14/18800	0.00035928	0.00838851	0.00739385	NPM1/XPO1/RAN/ABCE1	4
GO:0098760	BP	GO:0098760	response to interleukin-7	4/486	14/18800	0.00035928	0.00838851	0.00739385	YBX1/PDIA3/HDGF/STIP1	4
GO:0098761	BP	GO:0098761	cellular response to interleukin-7	4/486	14/18800	0.00035928	0.00838851	0.00739385	YBX1/PDIA3/HDGF/STIP1	4
GO:0009144	BP	GO:0009144	purine nucleoside triphosphate metabolic process	9/486	87/18800	0.000411528	0.00954798	0.00841583	NME2/TMSB4X/ATP6V0C/PARP1/RAN/NME1/STOML2/ITPA/UQCC3	9
GO:0046718	BP	GO:0046718	viral entry into host cell	12/486	146/18800	0.000418159	0.00964117	0.00849797	RNASEK/CD81/CDK1/SLC1A5/RPSA/CD46/SIVA1/ITGB1/LGALS1/SLC3A2/BSG/LAMP1	12
GO:2000767	BP	GO:2000767	positive regulation of cytoplasmic translation	4/486	15/18800	0.000479962	0.0109974	0.00969338	YBX1/HNRNPD/HNRNPU/PKM	4
GO:0009199	BP	GO:0009199	ribonucleoside triphosphate metabolic process	9/486	89/18800	0.00048735	0.0110297	0.00972183	NME2/TMSB4X/ATP6V0C/PARP1/RAN/NME1/STOML2/ITPA/UQCC3	9
GO:2001251	BP	GO:2001251	negative regulation of chromosome organization	9/486	89/18800	0.00048735	0.0110297	0.00972183	CENPF/TOP2A/CCNB1/PTTG1/HNRNPU/PARP1/SMARCA5/ANAPC15/HNRNPC	9
GO:0000070	BP	GO:0000070	mitotic sister chromatid segregation	13/486	171/18800	0.000517994	0.0115967	0.0102216	CENPF/CCNB1/UBE2C/PTTG1/SMC1A/HNRNPU/KPNB1/RAN/SMC3/SMARCA5/ANAPC15/NUDC/NAA50	13
GO:0043161	BP	GO:0043161	proteasome-mediated ubiquitin-dependent protein catabolic process	23/486	414/18800	0.000518692	0.0115967	0.0102216	HSP90AB1/UBE2S/HSP90B1/UBE2C/CALR/HSPA5/XPO1/GABARAP/PSMD7/PSMD1/PSMD8/PSMD6/TAF9/SMARCC1/NFE2L2/RAD23A/PSMF1/PSMA2/UFD1/UBE2K/UBXN4/PSMD2/CANX	23
GO:0007007	BP	GO:0007007	inner mitochondrial membrane organization	6/486	40/18800	0.0005266	0.0116572	0.010275	MICOS10/MICOS13/HSPA9/UQCC3/CHCHD3/IMMT	6
GO:2001022	BP	GO:2001022	positive regulation of response to DNA damage stimulus	11/486	129/18800	0.000527719	0.0116572	0.010275	HMGB1/PRKDC/RPS3/PARP1/RPL26/PCNA/DDX5/BCLAF1/FUS/TRIM28/RUVBL1	11
GO:0000280	BP	GO:0000280	nuclear division	24/486	446/18800	0.000621333	0.0136434	0.0120257	UBE2S/CENPF/TOP2A/CCNB1/MKI67/TPX2/UBE2C/PTTG1/KIF20B/SMC1A/CALR/HNRNPU/RANBP1/KPNB1/RAN/PHB2/SMC3/CENPX/BANF1/SMARCA5/ANAPC15/NUDC/EPS8/NAA50	24
GO:0042407	BP	GO:0042407	cristae formation	4/486	16/18800	0.000626943	0.0136852	0.0120625	MICOS13/UQCC3/CHCHD3/IMMT	4
GO:0044409	BP	GO:0044409	entry into host	12/486	153/18800	0.000637562	0.0138351	0.0121946	RNASEK/CD81/CDK1/SLC1A5/RPSA/CD46/SIVA1/ITGB1/LGALS1/SLC3A2/BSG/LAMP1	12
GO:2001233	BP	GO:2001233	regulation of apoptotic signaling pathway	21/486	370/18800	0.000681744	0.0147073	0.0129634	EIF5A/LGALS3/RPS3/HMGB2/MIF/PARP1/RPL26/BCLAF1/SFPQ/PDIA3/HNRNPK/TAF9/PPIA/NFE2L2/LMNA/DDX3X/TRAP1/NONO/VDAC2/URI1/PAK2	21
GO:0031623	BP	GO:0031623	receptor internalization	10/486	113/18800	0.000700601	0.0150263	0.0132445	CD9/CD81/ITGB1/ANXA2/CD63/EZR/GRB2/CLTC/ARF1/LRPAP1	10
GO:0006611	BP	GO:0006611	protein export from nucleus	7/486	58/18800	0.000710919	0.0151594	0.0133619	CALR/ANP32B/XPO1/RAN/YWHAE/HSPA9/NUTF2	7
GO:0052126	BP	GO:0052126	movement in host environment	13/486	177/18800	0.000717025	0.0152018	0.0133992	RNASEK/CD81/CDK1/SLC1A5/RPSA/CD46/SIVA1/ITGB1/LGALS1/SLC3A2/PPIA/BSG/LAMP1	13
GO:0002218	BP	GO:0002218	activation of innate immune response	7/486	59/18800	0.000788956	0.0166312	0.0146592	HSP90AA1/HMGB1/XRCC5/PRKDC/SFPQ/NONO/PAK2	7
GO:1902165	BP	GO:1902165	regulation of intrinsic apoptotic signaling pathway in response to DNA damage by p53 class mediator	4/486	17/18800	0.000803201	0.0167539	0.0147673	MIF/RPL26/HNRNPK/TAF9	4
GO:0050686	BP	GO:0050686	negative regulation of mRNA processing	5/486	29/18800	0.000803861	0.0167539	0.0147673	C1QBP/HNRNPA2B1/SRSF7/HNRNPK/SRSF10	5
GO:0009895	BP	GO:0009895	negative regulation of catabolic process	19/486	324/18800	0.000822173	0.0170393	0.0150189	HSP90AB1/YBX1/HNRNPD/HNRNPAB/HNRNPU/SF3B3/TIMP1/DKC1/ANXA2/FUS/EIF4G1/TAF9/SMARCC1/ATRAID/RPL5/LRPPRC/PSMF1/EIF4G2/HNRNPC	19
GO:0002833	BP	GO:0002833	positive regulation of response to biotic stimulus	13/486	180/18800	0.000838531	0.0172812	0.0152321	HSP90AA1/HMGB1/HSPD1/XRCC5/PRKDC/RPS19/HMGB2/MIF/SFPQ/LAMP1/NONO/UBE2K/PAK2	13
GO:1902369	BP	GO:1902369	negative regulation of RNA catabolic process	8/486	78/18800	0.000905074	0.018549	0.0163495	YBX1/HNRNPD/HNRNPAB/HNRNPU/DKC1/FUS/LRPPRC/HNRNPC	8
GO:0031497	BP	GO:0031497	chromatin assembly	14/486	205/18800	0.000930191	0.0189584	0.0167104	NPM1/CENPW/SET/NASP/DNMT1/ANP32B/HMGB2/CENPV/CBX3/TRIM28/HP1BP3/SMARCA5/RBBP4/NAP1L1	14
GO:1902914	BP	GO:1902914	regulation of protein polyubiquitination	5/486	30/18800	0.000944363	0.0190849	0.0168219	UBE2V1/GABARAP/PPIA/TRIM44/DDX3X	5
GO:0010638	BP	GO:0010638	positive regulation of organelle organization	25/486	487/18800	0.000946742	0.0190849	0.0168219	CCT6A/CCT5/XRCC5/HNRNPD/DNMT1/HNRNPA2B1/RPS3/CCT2/SFPQ/DKC1/ANXA2/ARPC2/LMAN1/TRIM28/CCT3/STOML2/CCT8/TCP1/PDCD5/PFDN2/GRB2/NMT1/GNL3/CCT4/SSBP1	25
GO:0008631	BP	GO:0008631	intrinsic apoptotic signaling pathway in response to oxidative stress	6/486	45/18800	0.00100222	0.0200934	0.0177108	PARP1/SFPQ/PPIA/NFE2L2/TRAP1/NONO	6
GO:0045945	BP	GO:0045945	positive regulation of transcription by RNA polymerase III	4/486	18/18800	0.00101174	0.0201746	0.0177824	DEK/DDX21/SMARCA5/SF3B1	4
GO:0045089	BP	GO:0045089	positive regulation of innate immune response	11/486	140/18800	0.00104436	0.0207132	0.0182571	HSP90AA1/HMGB1/XRCC5/PRKDC/RPS19/HMGB2/SFPQ/LAMP1/NONO/UBE2K/PAK2	11
GO:0032386	BP	GO:0032386	regulation of intracellular transport	19/486	332/18800	0.00109638	0.0216286	0.019064	HSP90AB1/CD81/KIF20B/CDK1/ANP32B/XPO1/RAN/NOLC1/ANXA2/LMAN1/TRIM28/YWHAE/PPP1CC/PDCD5/LAMP1/GCC2/EZR/REEP5/NMT1	19
GO:0034508	BP	GO:0034508	centromere complex assembly	5/486	31/18800	0.00110233	0.0216302	0.0190654	CENPF/CENPW/NASP/CENPV/CENPX	5
GO:0072655	BP	GO:0072655	establishment of protein localization to mitochondrion	10/486	120/18800	0.0011163	0.0217886	0.019205	HSP90AA1/HSPD1/PAM16/TOMM40/TOMM5/LMAN1/PDCD5/HSPA4/NMT1/TOMM20	10
GO:0006626	BP	GO:0006626	protein targeting to mitochondrion	9/486	101/18800	0.00122007	0.0236885	0.0208797	HSP90AA1/HSPD1/PAM16/TOMM40/TOMM5/LMAN1/PDCD5/HSPA4/TOMM20	9
GO:0007051	BP	GO:0007051	spindle organization	13/486	188/18800	0.00124974	0.0241376	0.0212755	CCNB1/TPX2/SMC1A/RPS3/HNRNPU/KPNB1/RAN/SMC3/TUBB/NUDC/NTMT1/EZR/CLTC	13
GO:1902253	BP	GO:1902253	regulation of intrinsic apoptotic signaling pathway by p53 class mediator	5/486	32/18800	0.00127904	0.0245749	0.021661	EIF5A/MIF/RPL26/HNRNPK/TAF9	5
GO:2001243	BP	GO:2001243	negative regulation of intrinsic apoptotic signaling pathway	9/486	102/18800	0.00130822	0.0250053	0.0220403	MIF/TAF9/PPIA/NFE2L2/DDX3X/TRAP1/NONO/VDAC2/URI1	9
GO:1901989	BP	GO:1901989	positive regulation of cell cycle phase transition	10/486	123/18800	0.00134745	0.0256223	0.0225841	NPM1/CCNB1/UBE2C/CDK1/DDX39B/PHB2/CCND1/APEX1/EIF4G1/DDX3X	10
GO:0098813	BP	GO:0098813	nuclear chromosome segregation	17/486	287/18800	0.00136268	0.0257791	0.0227224	CENPF/TOP2A/CCNB1/UBE2C/PTTG1/SMC1A/HNRNPU/KPNB1/RAN/PHB2/SMC3/SFPQ/CENPX/SMARCA5/ANAPC15/NUDC/NAA50	17
GO:1901796	BP	GO:1901796	regulation of signal transduction by p53 class mediator	9/486	103/18800	0.00140144	0.0263771	0.0232494	EIF5A/RPL37/MIF/RPL26/DDX5/HNRNPK/TAF9/RPF2/RPL5	9
GO:0046822	BP	GO:0046822	regulation of nucleocytoplasmic transport	9/486	104/18800	0.00149993	0.0280875	0.024757	HSP90AB1/CDK1/ANP32B/XPO1/RAN/NOLC1/TRIM28/YWHAE/PPP1CC	9
GO:0070585	BP	GO:0070585	protein localization to mitochondrion	10/486	125/18800	0.00152213	0.0283593	0.0249966	HSP90AA1/HSPD1/PAM16/TOMM40/TOMM5/LMAN1/PDCD5/HSPA4/NMT1/TOMM20	10
GO:1902176	BP	GO:1902176	negative regulation of oxidative stress-induced intrinsic apoptotic signaling pathway	4/486	20/18800	0.00153766	0.0285034	0.0251237	PPIA/NFE2L2/TRAP1/NONO	4
GO:0042176	BP	GO:0042176	regulation of protein catabolic process	21/486	395/18800	0.00154532	0.0285034	0.0251237	HSP90AA1/HSP90AB1/NKD1/CD81/SF3B3/TIMP1/XPO1/GABARAP/PSMD1/ANXA2/TAF9/SMARCC1/NFE2L2/ATRAID/RPL5/RAD23A/PSMF1/EZR/UBE2K/ODC1/PSMD2	21
GO:0006405	BP	GO:0006405	RNA export from nucleus	8/486	85/18800	0.00158822	0.029149	0.0256927	NPM1/ALYREF/HNRNPA2B1/DDX39B/THOC2/RAN/SSB/SRSF3	8
GO:0000492	BP	GO:0000492	box C/D snoRNP assembly	3/486	10/18800	0.00179916	0.0326951	0.0288183	TAF9/SNU13/RUVBL1	3
GO:0010998	BP	GO:0010998	regulation of translational initiation by eIF2 alpha phosphorylation	3/486	10/18800	0.00179916	0.0326951	0.0288183	NPM1/TMED2/EIF2AK1	3
GO:0009206	BP	GO:0009206	purine ribonucleoside triphosphate biosynthetic process	7/486	68/18800	0.00183767	0.0332312	0.0292908	NME2/TMSB4X/ATP6V0C/PARP1/NME1/STOML2/UQCC3	7
GO:0061013	BP	GO:0061013	regulation of mRNA catabolic process	12/486	173/18800	0.0018493	0.0332784	0.0293324	NPM1/YBX1/HNRNPD/SERBP1/HNRNPAB/HNRNPU/HNRNPM/FUS/APEX1/EIF4A3/RBM8A/HNRNPC	12
GO:0009145	BP	GO:0009145	purine nucleoside triphosphate biosynthetic process	7/486	69/18800	0.00200055	0.0358091	0.031563	NME2/TMSB4X/ATP6V0C/PARP1/NME1/STOML2/UQCC3	7
GO:0090068	BP	GO:0090068	positive regulation of cell cycle process	15/486	247/18800	0.00200935	0.0358091	0.031563	NPM1/CCNB1/UBE2C/KIF20B/CDK1/HNRNPU/DDX39B/RANBP1/CENPV/PHB2/CCND1/SFPQ/APEX1/EIF4G1/DDX3X	15
GO:0033157	BP	GO:0033157	regulation of intracellular protein transport	14/486	224/18800	0.00215077	0.0381451	0.0336221	HSP90AB1/CD81/KIF20B/CDK1/ANP32B/XPO1/RAN/NOLC1/LMAN1/TRIM28/YWHAE/PDCD5/GCC2/NMT1	14
GO:0140467	BP	GO:0140467	integrated stress response signaling	4/486	22/18800	0.00222862	0.0393367	0.0346724	HSPA5/NFE2L2/TMED2/EIF2AK1	4
GO:0032508	BP	GO:0032508	DNA duplex unwinding	8/486	90/18800	0.00228784	0.0401898	0.0354243	HMGA1/TOP2A/XRCC5/CHD4/DDX3X/DDX1/RUVBL1/SSBP1	8
GO:0007338	BP	GO:0007338	single fertilization	11/486	155/18800	0.00236096	0.0412522	0.0363608	CCT5/CD9/CDK1/CD46/CCT2/CCT3/SNU13/CCT8/TCP1/VDAC2/CCT4	11
GO:0048285	BP	GO:0048285	organelle fission	24/486	493/18800	0.00239408	0.0412522	0.0363608	UBE2S/CENPF/TOP2A/CCNB1/MKI67/TPX2/UBE2C/PTTG1/KIF20B/SMC1A/CALR/HNRNPU/RANBP1/KPNB1/RAN/PHB2/SMC3/CENPX/BANF1/SMARCA5/ANAPC15/NUDC/EPS8/NAA50	24
GO:0045787	BP	GO:0045787	positive regulation of cell cycle	18/486	329/18800	0.00239926	0.0412522	0.0363608	NPM1/CCNB1/UBE2C/KIF20B/CDK1/CALR/HNRNPU/DDX39B/RANBP1/CENPV/PHB2/CCND1/SFPQ/APEX1/EIF4G1/DDX3X/RAD23A/CKS1B	18
GO:0031055	BP	GO:0031055	chromatin remodeling at centromere	3/486	11/18800	0.0024266	0.0412522	0.0363608	CENPW/NASP/CENPV	3
GO:0036490	BP	GO:0036490	regulation of translation in response to endoplasmic reticulum stress	3/486	11/18800	0.0024266	0.0412522	0.0363608	EIF4G1/DDX3X/TMED2	3
GO:0075522	BP	GO:0075522	IRES-dependent viral translational initiation	3/486	11/18800	0.0024266	0.0412522	0.0363608	EIF3A/EIF3F/SSB	3
GO:2000622	BP	GO:2000622	regulation of nuclear-transcribed mRNA catabolic process, nonsense-mediated decay	3/486	11/18800	0.0024266	0.0412522	0.0363608	HNRNPAB/EIF4A3/RBM8A	3
GO:0045454	BP	GO:0045454	cell redox homeostasis	5/486	37/18800	0.00249057	0.0421455	0.0371481	PRDX4/NQO1/APEX1/NFE2L2/GLRX3	5
GO:0019079	BP	GO:0019079	viral genome replication	10/486	134/18800	0.00254989	0.0429523	0.0378593	TOP2A/PPIB/DEK/TRIM28/BANF1/PPIA/ILF3/DDX3X/RAD23A/NUCKS1	10
GO:1902229	BP	GO:1902229	regulation of intrinsic apoptotic signaling pathway in response to DNA damage	5/486	38/18800	0.00280798	0.0470848	0.0415017	RPS3/MIF/RPL26/HNRNPK/TAF9	5
GO:1905517	BP	GO:1905517	macrophage migration	6/486	55/18800	0.00287178	0.0479367	0.0422526	CD9/CD81/LGALS3/MDK/MIF/CKLF	6
GO:0009201	BP	GO:0009201	ribonucleoside triphosphate biosynthetic process	7/486	74/18800	0.00298899	0.0496685	0.0437791	NME2/TMSB4X/ATP6V0C/PARP1/NME1/STOML2/UQCC3	7
GO:0045739	BP	GO:0045739	positive regulation of DNA repair	8/486	94/18800	0.00300503	0.049711	0.0438166	HMGB1/PRKDC/RPS3/PARP1/PCNA/FUS/TRIM28/RUVBL1	8
GO:0005840	CC	GO:0005840	ribosome	48/502	229/19594	4.85715e-30	2.618e-27	1.7997e-27	RPL36A/RPL17/RPS21/RPS2/RPS24/RPL39/RPL18/RPS12/RPL37/MRPS24/RPS17/RPL30/RPS23/RPS26/RPS19/RPS3/MRPL38/RPL7A/MRPS17/RPL38/RPSA/RPL26/RPL35A/RPS29/MRPS18C/APEX1/MRPL20/RPS13/MRPL12/RPL6/MRPL17/MRPL3/RPL5/BTF3/MRPS12/MRPL9/MRPL37/DNAJC21/MRPS2/NDUFA7/MRPS10/MRPL4/MRPL21/RPS10/MRPS34/CANX/MRPL18/RPL22L1	48
GO:0044391	CC	GO:0044391	ribosomal subunit	42/502	178/19594	1.31956e-28	3.55621e-26	2.44466e-26	RPL36A/RPL17/RPS21/RPS2/RPS24/RPL39/RPL18/RPS12/RPL37/MRPS24/RPS17/RPL30/RPS23/RPS26/RPS19/RPS3/MRPL38/RPL7A/MRPS17/RPL38/RPSA/RPL26/RPL35A/RPS29/MRPS18C/MRPL20/RPS13/MRPL12/RPL6/MRPL17/MRPL3/RPL5/MRPS12/MRPL9/MRPL37/MRPS2/MRPS10/MRPL4/MRPL21/RPS10/MRPS34/MRPL18	42
GO:0005681	CC	GO:0005681	spliceosomal complex	41/502	194/19594	6.10931e-26	1.09764e-23	7.54554e-24	NCL/YBX1/SNRPB/PNN/ALYREF/LGALS3/HNRNPA2B1/HNRNPU/DDX39B/SF3B3/HNRNPA3/PRPF8/HNRNPM/HNRNPR/DDX5/HNRNPH1/LSM7/SRRM2/HNRNPK/SNRPG/SNU13/LSM4/HNRNPF/SNRPE/SNRPA1/SNRPD1/SRSF1/SNRPF/LUC7L3/TRA2B/LUC7L2/LSM6/HNRNPH3/LSM2/LSM8/EIF4A3/RBM8A/SF3B2/HNRNPC/SF3B1/LSM5	41
GO:0071013	CC	GO:0071013	catalytic step 2 spliceosome	28/502	88/19594	2.30336e-23	3.10378e-21	2.13364e-21	SNRPB/PNN/ALYREF/HNRNPA2B1/HNRNPU/SF3B3/HNRNPA3/PRPF8/HNRNPM/HNRNPR/DDX5/HNRNPH1/LSM7/SRRM2/HNRNPK/SNRPG/HNRNPF/SNRPE/SNRPA1/SNRPD1/SRSF1/SNRPF/LSM2/EIF4A3/RBM8A/SF3B2/HNRNPC/SF3B1	28
GO:0022626	CC	GO:0022626	cytosolic ribosome	25/502	102/19594	6.22579e-18	6.7114e-16	4.61363e-16	RPL36A/RPL17/RPS21/RPS2/RPS24/RPL39/RPL18/RPS12/RPL37/RPS17/RPL30/RPS23/RPS26/RPS19/RPS3/RPL7A/RPL38/RPSA/RPL26/RPL35A/RPS29/RPS13/RPL6/RPL5/RPS10	25
GO:0071005	CC	GO:0071005	U2-type precatalytic spliceosome	18/502	50/19594	1.4164e-16	1.2724e-14	8.74691e-15	SNRPB/SF3B3/PRPF8/LSM7/SRRM2/SNRPG/SNU13/LSM4/SNRPE/SNRPA1/SNRPD1/SNRPF/LSM6/LSM2/LSM8/SF3B2/SF3B1/LSM5	18
GO:0015935	CC	GO:0015935	small ribosomal subunit	20/502	69/19594	3.69353e-16	2.84402e-14	1.95507e-14	RPS21/RPS2/RPS24/RPS12/MRPS24/RPS17/RPS23/RPS26/RPS19/RPS3/MRPS17/RPSA/RPS29/MRPS18C/RPS13/MRPS12/MRPS2/MRPS10/RPS10/MRPS34	20
GO:0071011	CC	GO:0071011	precatalytic spliceosome	18/502	53/19594	4.7219e-16	3.18138e-14	2.18698e-14	SNRPB/SF3B3/PRPF8/LSM7/SRRM2/SNRPG/SNU13/LSM4/SNRPE/SNRPA1/SNRPD1/SNRPF/LSM6/LSM2/LSM8/SF3B2/SF3B1/LSM5	18
GO:0005684	CC	GO:0005684	U2-type spliceosomal complex	22/502	92/19594	1.08404e-15	6.4922e-14	4.46295e-14	SNRPB/SF3B3/PRPF8/LSM7/SRRM2/SNRPG/SNU13/LSM4/SNRPE/SNRPA1/SNRPD1/SNRPF/LUC7L3/LUC7L2/LSM6/LSM2/LSM8/EIF4A3/RBM8A/SF3B2/SF3B1/LSM5	22
GO:0005925	CC	GO:0005925	focal adhesion	43/502	419/19594	9.40335e-15	5.0684e-13	3.48419e-13	RPS2/HMGA1/NPM1/RPL18/RPS17/RPL30/HSP90B1/CD9/CD81/ATP6V0C/RPS19/PPIB/RPS3/CALR/RPL7A/HSPA5/RPL38/YWHAB/CD46/ACTG1/RPS29/ITGB1/ARPC2/PDIA3/YWHAE/HNRNPK/RPS13/PPIA/YWHAZ/PPP1CC/PPP1CB/RPL6/ARPC5/BSG/RPL5/TPM4/HSPA9/EZR/CLTC/RPS10/KRAS/ACTN4/ARF1	43
GO:0030055	CC	GO:0030055	cell-substrate junction	43/502	428/19594	1.99214e-14	9.7615e-13	6.71038e-13	RPS2/HMGA1/NPM1/RPL18/RPS17/RPL30/HSP90B1/CD9/CD81/ATP6V0C/RPS19/PPIB/RPS3/CALR/RPL7A/HSPA5/RPL38/YWHAB/CD46/ACTG1/RPS29/ITGB1/ARPC2/PDIA3/YWHAE/HNRNPK/RPS13/PPIA/YWHAZ/PPP1CC/PPP1CB/RPL6/ARPC5/BSG/RPL5/TPM4/HSPA9/EZR/CLTC/RPS10/KRAS/ACTN4/ARF1	43
GO:0015934	CC	GO:0015934	large ribosomal subunit	22/502	112/19594	8.63038e-14	3.87648e-12	2.66482e-12	RPL36A/RPL17/RPL39/RPL18/RPL37/RPL30/MRPL38/RPL7A/RPL38/RPL26/RPL35A/MRPL20/MRPL12/RPL6/MRPL17/MRPL3/RPL5/MRPL9/MRPL37/MRPL4/MRPL21/MRPL18	22
GO:0097525	CC	GO:0097525	spliceosomal snRNP complex	20/502	90/19594	9.896e-14	4.10304e-12	2.82056e-12	SNRPB/DDX39B/SF3B3/PRPF8/LSM7/SNRPG/SNU13/LSM4/SNRPE/SNRPA1/SNRPD1/SNRPF/LUC7L3/LUC7L2/LSM6/LSM2/LSM8/SF3B2/SF3B1/LSM5	20
GO:0005844	CC	GO:0005844	polysome	17/502	65/19594	4.05566e-13	1.56143e-11	1.07338e-11	RPL36A/RPS21/RPL39/RPL18/RPL30/RPS23/RPS26/RPS3/CALR/RPL7A/RPL38/PSMA6/RPS29/EIF4G1/RPL6/BTF3/PSMA1	17
GO:0042470	CC	GO:0042470	melanosome	21/502	109/19594	4.74793e-13	1.59946e-11	1.09952e-11	HSP90AA1/HSP90AB1/HSP90B1/PPIB/SLC1A5/HSPA5/YWHAB/RAN/ITGB1/ANXA2/PDIA3/YWHAE/CD63/SLC3A2/YWHAZ/BSG/LAMP1/CLTC/CANX/NAP1L1/CCT4	21
GO:0048770	CC	GO:0048770	pigment granule	21/502	109/19594	4.74793e-13	1.59946e-11	1.09952e-11	HSP90AA1/HSP90AB1/HSP90B1/PPIB/SLC1A5/HSPA5/YWHAB/RAN/ITGB1/ANXA2/PDIA3/YWHAE/CD63/SLC3A2/YWHAZ/BSG/LAMP1/CLTC/CANX/NAP1L1/CCT4	21
GO:0030532	CC	GO:0030532	small nuclear ribonucleoprotein complex	20/502	100/19594	8.20774e-13	2.60234e-11	1.78893e-11	SNRPB/DDX39B/SF3B3/PRPF8/LSM7/SNRPG/SNU13/LSM4/SNRPE/SNRPA1/SNRPD1/SNRPF/LUC7L3/LUC7L2/LSM6/LSM2/LSM8/SF3B2/SF3B1/LSM5	20
GO:0101031	CC	GO:0101031	chaperone complex	13/502	34/19594	9.97594e-13	2.98724e-11	2.05353e-11	HSP90AB1/CCT6A/CCT5/PTGES3/CCT2/SDF2L1/CCT3/CCT8/TCP1/CDC37/STIP1/RUVBL1/CCT4	13
GO:0000502	CC	GO:0000502	proteasome complex	16/502	59/19594	1.08188e-12	3.06912e-11	2.10981e-11	PSMA6/PSMD7/PSMA3/PSMD1/PSMD8/PSMB2/PSMA5/PSMD6/ADRM1/PSMA1/PSMA7/RAD23A/PSMD12/PSMF1/PSMA2/PSMD2	16
GO:0000313	CC	GO:0000313	organellar ribosome	18/502	81/19594	1.71988e-12	4.41436e-11	3.03457e-11	MRPS24/MRPL38/MRPS17/MRPS18C/MRPL20/MRPL12/MRPL17/MRPL3/MRPS12/MRPL9/MRPL37/MRPS2/NDUFA7/MRPS10/MRPL4/MRPL21/MRPS34/MRPL18	18
GO:0005761	CC	GO:0005761	mitochondrial ribosome	18/502	81/19594	1.71988e-12	4.41436e-11	3.03457e-11	MRPS24/MRPL38/MRPS17/MRPS18C/MRPL20/MRPL12/MRPL17/MRPL3/MRPS12/MRPL9/MRPL37/MRPS2/NDUFA7/MRPS10/MRPL4/MRPL21/MRPS34/MRPL18	18
GO:0120114	CC	GO:0120114	Sm-like protein family complex	20/502	111/19594	6.32341e-12	1.40118e-10	9.63219e-11	SNRPB/DDX39B/SF3B3/PRPF8/LSM7/SNRPG/SNU13/LSM4/SNRPE/SNRPA1/SNRPD1/SNRPF/LUC7L3/LUC7L2/LSM6/LSM2/LSM8/SF3B2/SF3B1/LSM5	20
GO:1905368	CC	GO:1905368	peptidase complex	20/502	111/19594	6.32341e-12	1.40118e-10	9.63219e-11	PSMA6/PSMD7/PSMA3/PSMD1/PSMD8/PSMB2/PSMA5/PSMD6/ADRM1/TAF9/TAF10/PSMA1/PSMA7/RAD23A/SEC11C/PSMD12/PSMF1/PSMA2/SPCS2/PSMD2	20
GO:0042788	CC	GO:0042788	polysomal ribosome	12/502	31/19594	6.36528e-12	1.40118e-10	9.63219e-11	RPL36A/RPS21/RPL39/RPL18/RPL30/RPS23/RPS26/RPL7A/RPL38/RPS29/RPL6/BTF3	12
GO:1904813	CC	GO:1904813	ficolin-1-rich granule lumen	21/502	124/19594	6.49899e-12	1.40118e-10	9.63219e-11	HSP90AA1/NME2/HSP90AB1/HMGB1/PRDX4/KPNB1/MIF/PKM/PSMD7/PSMA5/PSMD6/PPIA/CCT8/ARPC5/DDX3X/PSMD12/PSMA2/ILF2/GPI/PSMD2/PDAP1	21
GO:0101002	CC	GO:0101002	ficolin-1-rich granule	25/502	185/19594	1.14562e-11	2.37496e-10	1.63262e-10	HSP90AA1/NME2/HSP90AB1/HMGB1/PRDX4/ATP6V0C/LGALS3/DSP/KPNB1/MIF/PKM/PSMD7/PSMA5/PSMD6/PPIA/CCT8/ARPC5/DDX3X/PSMD12/PSMA2/LAMP1/ILF2/GPI/PSMD2/PDAP1	25
GO:0034774	CC	GO:0034774	secretory granule lumen	33/502	322/19594	1.39519e-11	2.78522e-10	1.91465e-10	HSP90AA1/NME2/FABP5/HSP90AB1/HMGB1/PA2G4/TMSB4X/XRCC5/PRDX4/TIMP1/KPNB1/MIF/CCT2/PKM/PSMD7/TUBB4B/PSMD1/ANXA2/PSMA5/PSMD6/TUBB/PPIA/CCT8/ARPC5/DDX3X/PSMD12/PSMA2/PDXK/ILF2/GPI/SERPINB1/PSMD2/ACTN4	33
GO:0046540	CC	GO:0046540	U4/U6 x U5 tri-snRNP complex	13/502	41/19594	1.60779e-11	3.095e-10	2.1276e-10	SNRPB/PRPF8/LSM7/SNRPG/SNU13/LSM4/SNRPE/SNRPD1/SNRPF/LSM6/LSM2/LSM8/LSM5	13
GO:0060205	CC	GO:0060205	cytoplasmic vesicle lumen	33/502	325/19594	1.79349e-11	3.33341e-10	2.2915e-10	HSP90AA1/NME2/FABP5/HSP90AB1/HMGB1/PA2G4/TMSB4X/XRCC5/PRDX4/TIMP1/KPNB1/MIF/CCT2/PKM/PSMD7/TUBB4B/PSMD1/ANXA2/PSMA5/PSMD6/TUBB/PPIA/CCT8/ARPC5/DDX3X/PSMD12/PSMA2/PDXK/ILF2/GPI/SERPINB1/PSMD2/ACTN4	33
GO:0031983	CC	GO:0031983	vesicle lumen	33/502	327/19594	2.11667e-11	3.80294e-10	2.61427e-10	HSP90AA1/NME2/FABP5/HSP90AB1/HMGB1/PA2G4/TMSB4X/XRCC5/PRDX4/TIMP1/KPNB1/MIF/CCT2/PKM/PSMD7/TUBB4B/PSMD1/ANXA2/PSMA5/PSMD6/TUBB/PPIA/CCT8/ARPC5/DDX3X/PSMD12/PSMA2/PDXK/ILF2/GPI/SERPINB1/PSMD2/ACTN4	33
GO:0097526	CC	GO:0097526	spliceosomal tri-snRNP complex	13/502	42/19594	2.27465e-11	3.95495e-10	2.71876e-10	SNRPB/PRPF8/LSM7/SNRPG/SNU13/LSM4/SNRPE/SNRPD1/SNRPF/LSM6/LSM2/LSM8/LSM5	13
GO:0022627	CC	GO:0022627	cytosolic small ribosomal subunit	13/502	43/19594	3.1849e-11	5.36456e-10	3.68778e-10	RPS21/RPS2/RPS24/RPS12/RPS17/RPS23/RPS26/RPS19/RPS3/RPSA/RPS29/RPS13/RPS10	13
GO:0098798	CC	GO:0098798	mitochondrial protein-containing complex	30/502	281/19594	4.3795e-11	7.15318e-10	4.91733e-10	MICOS10/MRPS24/MICOS13/MRPL38/MRPS17/PAM16/TOMM40/TOMM5/PHB2/MRPS18C/MRPL20/MRPL12/HADHA/MRPL17/MRPL3/MRPS12/MRPL9/HSPA9/MRPL37/MRPS2/NDUFA7/MRPS10/MRPL4/MRPL21/CHCHD3/NDUFB11/MRPS34/TOMM20/IMMT/MRPL18	30
GO:1905369	CC	GO:1905369	endopeptidase complex	16/502	79/19594	1.3268e-10	2.10337e-09	1.44593e-09	PSMA6/PSMD7/PSMA3/PSMD1/PSMD8/PSMB2/PSMA5/PSMD6/ADRM1/PSMA1/PSMA7/RAD23A/PSMD12/PSMF1/PSMA2/PSMD2	16
GO:0005689	CC	GO:0005689	U12-type spliceosomal complex	10/502	29/19594	1.44188e-09	2.22049e-08	1.52644e-08	YBX1/SNRPB/SF3B3/LSM7/SNRPG/SNRPE/SNRPD1/SNRPF/SF3B2/SF3B1	10
GO:0005743	CC	GO:0005743	mitochondrial inner membrane	38/502	491/19594	1.54156e-09	2.30806e-08	1.58663e-08	MICOS10/MRPS24/HSPD1/MICOS13/LGALS3/RPS3/MRPL38/MRPS17/PAM16/TOMM40/PHB2/MRPS18C/MRPL20/COX16/PET100/MRPL12/HADHA/STOML2/MRPL17/MRPL3/MRPS12/MRPL9/HSPA9/MRPL37/UQCC3/TRAP1/MRPS2/NDUFA7/MRPS10/MRPL4/MRPL21/CHCHD3/NDUFB11/MRPS34/RAB5IF/CHCHD1/IMMT/MRPL18	38
GO:0098687	CC	GO:0098687	chromosomal region	32/502	366/19594	1.65655e-09	2.41319e-08	1.65891e-08	CENPF/TOP2A/CCNB1/XRCC5/CENPW/DNMT1/PRKDC/ALYREF/CDK1/HNRNPA2B1/SMC1A/HNRNPU/SEPTIN2/THOC2/PTGES3/XPO1/PARP1/CENPV/PCNA/CHD4/SMC3/CBX3/NHP2/CENPX/APEX1/SSB/PPP1CC/PPP1CB/CBX5/RBBP4/SUGT1/RBBP7	32
GO:0005688	CC	GO:0005688	U6 snRNP	7/502	11/19594	2.0988e-09	2.90065e-08	1.994e-08	DDX39B/LSM7/LSM4/LSM6/LSM2/LSM8/LSM5	7
GO:0005832	CC	GO:0005832	chaperonin-containing T-complex	7/502	11/19594	2.0988e-09	2.90065e-08	1.994e-08	CCT6A/CCT5/CCT2/CCT3/CCT8/TCP1/CCT4	7
GO:0005839	CC	GO:0005839	proteasome core complex	8/502	20/19594	1.68724e-08	2.27356e-07	1.56292e-07	PSMA6/PSMA3/PSMB2/PSMA5/PSMA1/PSMA7/PSMF1/PSMA2	8
GO:0022625	CC	GO:0022625	cytosolic large ribosomal subunit	12/502	58/19594	2.14468e-08	2.79448e-07	1.92102e-07	RPL36A/RPL17/RPL39/RPL18/RPL37/RPL30/RPL7A/RPL38/RPL26/RPL35A/RPL6/RPL5	12
GO:0005759	CC	GO:0005759	mitochondrial matrix	35/502	473/19594	2.17752e-08	2.79448e-07	1.92102e-07	MRPS24/HSPD1/C1QBP/CCNB1/CDK1/RPS3/MRPL38/MRPS17/TFAM/PAM16/PCCA/MRPS18C/MRPL20/MRPL12/HADHA/HSPE1/MRPL17/MRPL3/GOT2/MRPS12/MRPL9/HSPA9/LRPPRC/MRPL37/TRAP1/MRPS2/NDUFA7/MRPS10/MRPL4/MRPL21/MRPS34/VDAC2/ABCE1/MRPL18/SSBP1	35
GO:0005742	CC	GO:0005742	mitochondrial outer membrane translocase complex	8/502	21/19594	2.66462e-08	3.34007e-07	2.29608e-07	MICOS10/MICOS13/TOMM40/TOMM5/HSPA9/CHCHD3/TOMM20/IMMT	8
GO:0098799	CC	GO:0098799	outer mitochondrial membrane protein complex	8/502	22/19594	4.09369e-08	5.01477e-07	3.44732e-07	MICOS10/MICOS13/TOMM40/TOMM5/HSPA9/CHCHD3/TOMM20/IMMT	8
GO:0000781	CC	GO:0000781	chromosome, telomeric region	19/502	166/19594	5.45545e-08	6.53442e-07	4.49197e-07	XRCC5/PRKDC/ALYREF/CDK1/HNRNPA2B1/THOC2/PTGES3/PARP1/PCNA/CHD4/CBX3/NHP2/APEX1/SSB/PPP1CC/PPP1CB/CBX5/RBBP4/RBBP7	19
GO:0016607	CC	GO:0016607	nuclear speck	31/502	411/19594	9.23526e-08	1.08213e-06	7.43893e-07	PNN/ALYREF/HNRNPU/DDX39B/RBM25/THOC2/PRPF8/BCLAF1/SRRM2/SFPQ/SRSF7/APEX1/WTAP/DDX46/SNRPA1/PPP1CC/SRSF1/LUC7L3/HP1BP3/SON/LUC7L2/SRSF3/LMNA/NONO/EIF4A3/SLC2A4RG/RBM8A/SF3B2/SF3B1/RBM39/SRSF10	31
GO:0005686	CC	GO:0005686	U2 snRNP	8/502	25/19594	1.29391e-07	1.48386e-06	1.02006e-06	SNRPB/SF3B3/SNRPG/SNRPE/SNRPA1/SNRPD1/SF3B2/SF3B1	8
GO:0034709	CC	GO:0034709	methylosome	6/502	12/19594	2.22508e-07	2.49858e-06	1.7176e-06	SNRPB/SNRPG/SNRPE/SNRPD1/SNRPF/PRMT1	6
GO:0005838	CC	GO:0005838	proteasome regulatory particle	7/502	19/19594	2.68091e-07	2.949e-06	2.02724e-06	PSMD7/PSMD1/PSMD8/PSMD6/ADRM1/PSMD12/PSMD2	7
GO:0005687	CC	GO:0005687	U4 snRNP	6/502	13/19594	4.04283e-07	4.35817e-06	2.99595e-06	SNRPB/DDX39B/SNRPG/SNRPE/SNRPD1/SNRPF	6
GO:0005732	CC	GO:0005732	sno(s)RNA-containing ribonucleoprotein complex	8/502	30/19594	6.25488e-07	6.48343e-06	4.45692e-06	NOP56/NOLC1/DKC1/NHP2/FBL/SNU13/LSM6/POP7	8
GO:0071007	CC	GO:0071007	U2-type catalytic step 2 spliceosome	8/502	30/19594	6.25488e-07	6.48343e-06	4.45692e-06	SNRPB/PRPF8/SRRM2/SNRPG/SNRPE/SNRPA1/SNRPD1/SNRPF	8
GO:0000793	CC	GO:0000793	condensed chromosome	22/502	255/19594	7.56165e-07	7.56854e-06	5.20286e-06	HMGB1/CENPF/TOP2A/CCNB1/MKI67/CENPW/SMC1A/HNRNPU/SEPTIN2/HMGB2/XPO1/CENPV/SMC3/CBX3/CENPX/BANF1/PPP1CC/CBX5/SMARCA5/LRPPRC/NIFK/SUGT1	22
GO:0016363	CC	GO:0016363	nuclear matrix	14/502	109/19594	7.58258e-07	7.56854e-06	5.20286e-06	KRT8/CENPF/CENPW/HNRNPA2B1/SMC1A/HNRNPU/PSMA6/HNRNPM/PHB2/SMC3/SFPQ/LMNA/NONO/RUVBL1	14
GO:0005697	CC	GO:0005697	telomerase holoenzyme complex	7/502	22/19594	8.48752e-07	8.31777e-06	5.71791e-06	SNRPB/HNRNPU/PTGES3/DKC1/NHP2/SNRPE/HNRNPC	7
GO:0034399	CC	GO:0034399	nuclear periphery	15/502	127/19594	9.16663e-07	8.82288e-06	6.06514e-06	KRT8/CENPF/CENPW/HNRNPA2B1/SMC1A/HNRNPU/PSMA6/HNRNPM/PCNA/PHB2/SMC3/SFPQ/LMNA/NONO/RUVBL1	15
GO:0000315	CC	GO:0000315	organellar large ribosomal subunit	10/502	54/19594	9.69645e-07	9.01101e-06	6.19447e-06	MRPL38/MRPL20/MRPL12/MRPL17/MRPL3/MRPL9/MRPL37/MRPL4/MRPL21/MRPL18	10
GO:0005762	CC	GO:0005762	mitochondrial large ribosomal subunit	10/502	54/19594	9.69645e-07	9.01101e-06	6.19447e-06	MRPL38/MRPL20/MRPL12/MRPL17/MRPL3/MRPL9/MRPL37/MRPL4/MRPL21/MRPL18	10
GO:0035770	CC	GO:0035770	ribonucleoprotein granule	22/502	261/19594	1.11866e-06	1.02196e-05	7.02532e-06	NCL/YBX1/HNRNPAB/HNRNPU/PRRC2C/HNRNPA3/PSMA6/KPNB1/EIF4G1/HNRNPK/TUBB/SNRPG/LSM4/RPL6/CAPRIN1/DDX3X/LSM6/PSMA2/DDX1/LSM2/SERPINB1/TOP1	22
GO:0022624	CC	GO:0022624	proteasome accessory complex	7/502	23/19594	1.19323e-06	1.07192e-05	7.36873e-06	PSMD7/PSMD1/PSMD8/PSMD6/ADRM1/PSMD12/PSMD2	7
GO:0036464	CC	GO:0036464	cytoplasmic ribonucleoprotein granule	21/502	243/19594	1.31119e-06	1.15858e-05	7.96443e-06	NCL/YBX1/HNRNPAB/HNRNPU/PRRC2C/PSMA6/KPNB1/EIF4G1/HNRNPK/TUBB/SNRPG/LSM4/RPL6/CAPRIN1/DDX3X/LSM6/PSMA2/DDX1/LSM2/SERPINB1/TOP1	21
GO:0071004	CC	GO:0071004	U2-type prespliceosome	6/502	17/19594	2.67158e-06	2.28569e-05	1.57126e-05	SNRPB/LSM7/SNRPG/LUC7L3/LUC7L2/SF3B1	6
GO:0071010	CC	GO:0071010	prespliceosome	6/502	17/19594	2.67158e-06	2.28569e-05	1.57126e-05	SNRPB/LSM7/SNRPG/LUC7L3/LUC7L2/SF3B1	6
GO:0000314	CC	GO:0000314	organellar small ribosomal subunit	7/502	26/19594	2.99505e-06	2.48359e-05	1.7073e-05	MRPS24/MRPS17/MRPS18C/MRPS12/MRPS2/MRPS10/MRPS34	7
GO:0005763	CC	GO:0005763	mitochondrial small ribosomal subunit	7/502	26/19594	2.99505e-06	2.48359e-05	1.7073e-05	MRPS24/MRPS17/MRPS18C/MRPS12/MRPS2/MRPS10/MRPS34	7
GO:0034708	CC	GO:0034708	methyltransferase complex	12/502	92/19594	3.96366e-06	3.23699e-05	2.22521e-05	SNRPB/WTAP/TAF9/SNRPG/SNRPE/SNRPD1/SNRPF/CBX5/PRMT1/RBBP4/RBBP7/RUVBL1	12
GO:0016281	CC	GO:0016281	eukaryotic translation initiation factor 4F complex	5/502	11/19594	4.40034e-06	3.53998e-05	2.4335e-05	EIF4A1/EIF4B/EIF4G1/EIF4H/EIF4G2	5
GO:0005791	CC	GO:0005791	rough endoplasmic reticulum	11/502	79/19594	5.24898e-06	4.16059e-05	2.86013e-05	RPS21/RPL18/RPS23/RPS26/PKM/RPS29/RPL6/SSR4/CANX/LRPAP1/ARL6IP1	11
GO:0001401	CC	GO:0001401	SAM complex	5/502	13/19594	1.17472e-05	9.04531e-05	6.21804e-05	MICOS10/MICOS13/HSPA9/CHCHD3/IMMT	5
GO:0140275	CC	GO:0140275	MIB complex	5/502	13/19594	1.17472e-05	9.04531e-05	6.21804e-05	MICOS10/MICOS13/HSPA9/CHCHD3/IMMT	5
GO:0001650	CC	GO:0001650	fibrillar center	14/502	140/19594	1.49351e-05	0.000113381	7.79415e-05	NOP56/MTDH/WDR43/NOLC1/DKC1/FBL/DDX46/POLR2F/SMARCA5/UTP4/EZR/NONO/TOP1/CHCHD1	14
GO:0005685	CC	GO:0005685	U1 snRNP	7/502	33/19594	1.6652e-05	0.000124659	8.56944e-05	SNRPB/SNRPG/SNRPE/SNRPD1/SNRPF/LUC7L3/LUC7L2	7
GO:0140534	CC	GO:0140534	endoplasmic reticulum protein-containing complex	13/502	125/19594	1.97117e-05	0.000145542	0.00010005	HSP90B1/PPIB/CALR/HSPA5/SDF2L1/PDIA3/MLEC/HLA-A/SEC11C/UFD1/SPCS2/SSR4/ARL6IP1	13
GO:0005852	CC	GO:0005852	eukaryotic translation initiation factor 3 complex	5/502	15/19594	2.62689e-05	0.000188786	0.000129777	EIF3A/EIF3F/EIF3M/EIF3J/EIF3I	5
GO:0033290	CC	GO:0033290	eukaryotic 48S preinitiation complex	5/502	15/19594	2.62689e-05	0.000188786	0.000129777	EIF3A/EIF3F/EIF3M/EIF3J/EIF3I	5
GO:0030684	CC	GO:0030684	preribosome	10/502	78/19594	2.94382e-05	0.000208779	0.000143522	NOP56/XRCC5/PRKDC/MRTO4/NOB1/KRR1/FBL/SNU13/UTP4/NSA2	10
GO:0016282	CC	GO:0016282	eukaryotic 43S preinitiation complex	5/502	17/19594	5.18789e-05	0.000362745	0.000249363	EIF3A/EIF3F/EIF3M/EIF3J/EIF3I	5
GO:0032040	CC	GO:0032040	small-subunit processome	7/502	39/19594	5.24937e-05	0.000362745	0.000249363	NOP56/XRCC5/PRKDC/KRR1/FBL/SNU13/UTP4	7
GO:0070603	CC	GO:0070603	SWI/SNF superfamily-type complex	10/502	86/19594	6.90204e-05	0.00046796	0.000321691	DEK/DDX21/CHD4/SMARCC1/SMARCA5/ANP32E/RBBP4/RBBP7/RUVBL1/SF3B1	10
GO:0034719	CC	GO:0034719	SMN-Sm protein complex	5/502	18/19594	7.03243e-05	0.00046796	0.000321691	SNRPB/SNRPG/SNRPE/SNRPD1/SNRPF	5
GO:0070993	CC	GO:0070993	translation preinitiation complex	5/502	18/19594	7.03243e-05	0.00046796	0.000321691	EIF3A/EIF3F/EIF3M/EIF3J/EIF3I	5
GO:0032592	CC	GO:0032592	integral component of mitochondrial membrane	10/502	88/19594	8.40621e-05	0.000543118	0.000373357	MICOS10/MICOS13/TOMM40/COX16/PET100/HSPA9/UQCC3/CHCHD3/TOMM20/IMMT	10
GO:1904949	CC	GO:1904949	ATPase complex	10/502	88/19594	8.40621e-05	0.000543118	0.000373357	DEK/DDX21/CHD4/SMARCC1/SMARCA5/ANP32E/RBBP4/RBBP7/RUVBL1/SF3B1	10
GO:0031305	CC	GO:0031305	integral component of mitochondrial inner membrane	8/502	56/19594	8.46418e-05	0.000543118	0.000373357	MICOS10/MICOS13/COX16/PET100/HSPA9/UQCC3/CHCHD3/IMMT	8
GO:0031304	CC	GO:0031304	intrinsic component of mitochondrial inner membrane	8/502	57/19594	9.62819e-05	0.000605255	0.000416072	MICOS10/MICOS13/COX16/PET100/HSPA9/UQCC3/CHCHD3/IMMT	8
GO:0005790	CC	GO:0005790	smooth endoplasmic reticulum	6/502	30/19594	9.65713e-05	0.000605255	0.000416072	PPIB/CALR/HSPA5/GABARAP/PGRMC1/CANX	6
GO:0098573	CC	GO:0098573	intrinsic component of mitochondrial membrane	10/502	90/19594	0.000101796	0.000630667	0.000433541	MICOS10/MICOS13/TOMM40/COX16/PET100/HSPA9/UQCC3/CHCHD3/TOMM20/IMMT	10
GO:0005635	CC	GO:0005635	nuclear envelope	27/502	479/19594	0.000120147	0.000735902	0.000505883	S100A6/EIF5A/CENPF/YBX1/MTDH/CALR/RANBP1/KPNB1/XPO1/PARP1/RAN/CENPV/TMPO/CCND1/CBX3/JPT1/BANF1/WTAP/TUBB/ATRAID/TRA2B/CBX5/LMNA/LRPPRC/NUTF2/UBXN4/CACYBP	27
GO:0034663	CC	GO:0034663	endoplasmic reticulum chaperone complex	4/502	11/19594	0.000121748	0.000737326	0.000506862	HSP90B1/PPIB/HSPA5/SDF2L1	4
GO:0000779	CC	GO:0000779	condensed chromosome, centromeric region	13/502	156/19594	0.00019546	0.00117059	0.000804702	CENPF/CCNB1/CENPW/SMC1A/HNRNPU/SEPTIN2/XPO1/CENPV/CBX3/CENPX/PPP1CC/CBX5/SUGT1	13
GO:0030496	CC	GO:0030496	midbody	15/502	203/19594	0.000245632	0.0014549	0.00100014	CIAO2B/CENPF/HSP90B1/KIF20B/CDK1/HNRNPU/SEPTIN2/HSPA5/RAN/CENPV/ANXA2/PPP1CC/NUDC/JTB/GNL3	15
GO:0005682	CC	GO:0005682	U5 snRNP	5/502	23/19594	0.000248435	0.0014555	0.00100056	SNRPB/PRPF8/SNRPG/SNRPE/SNRPD1	5
GO:0000775	CC	GO:0000775	chromosome, centromeric region	16/502	227/19594	0.000264037	0.00153028	0.00105196	CENPF/TOP2A/CCNB1/CENPW/DNMT1/SMC1A/HNRNPU/SEPTIN2/XPO1/CENPV/SMC3/CBX3/CENPX/PPP1CC/CBX5/SUGT1	16
GO:0031968	CC	GO:0031968	organelle outer membrane	16/502	232/19594	0.000336989	0.00193231	0.00132833	MICOS10/TOMM6/MICOS13/TOMM40/TOMM5/PHB2/PPP1CC/PGRMC1/HSPA9/LRPPRC/NUTF2/CHCHD3/KRAS/VDAC2/TOMM20/IMMT	16
GO:0019867	CC	GO:0019867	outer membrane	16/502	234/19594	0.000370705	0.00210326	0.00144585	MICOS10/TOMM6/MICOS13/TOMM40/TOMM5/PHB2/PPP1CC/PGRMC1/HSPA9/LRPPRC/NUTF2/CHCHD3/KRAS/VDAC2/TOMM20/IMMT	16
GO:0000776	CC	GO:0000776	kinetochore	12/502	146/19594	0.000386974	0.0021727	0.00149358	CENPF/CCNB1/CENPW/SMC1A/HNRNPU/SEPTIN2/XPO1/CENPV/CENPX/PPP1CC/CBX5/SUGT1	12
GO:0009295	CC	GO:0009295	nucleoid	6/502	44/19594	0.000848011	0.00466122	0.00320428	TFAM/HADHA/HSPA9/LRPPRC/VDAC2/SSBP1	6
GO:0042645	CC	GO:0042645	mitochondrial nucleoid	6/502	44/19594	0.000848011	0.00466122	0.00320428	TFAM/HADHA/HSPA9/LRPPRC/VDAC2/SSBP1	6
GO:0005741	CC	GO:0005741	mitochondrial outer membrane	14/502	205/19594	0.000856143	0.00466122	0.00320428	MICOS10/TOMM6/MICOS13/TOMM40/TOMM5/PHB2/PPP1CC/PGRMC1/HSPA9/CHCHD3/KRAS/VDAC2/TOMM20/IMMT	14
GO:0010494	CC	GO:0010494	cytoplasmic stress granule	8/502	79/19594	0.000930765	0.00496715	0.00341458	YBX1/PRRC2C/KPNB1/EIF4G1/HNRNPK/CAPRIN1/DDX3X/DDX1	8
GO:0015030	CC	GO:0015030	Cajal body	8/502	79/19594	0.000930765	0.00496715	0.00341458	HNRNPA2B1/XPO1/NOLC1/SRRM2/DKC1/NHP2/FBL/DDX46	8
GO:0005667	CC	GO:0005667	transcription regulator complex	24/502	483/19594	0.00163955	0.00866391	0.00595586	HMGB1/HMGA1/HES6/PRKDC/HNRNPAB/PARP1/CHD4/CCND1/SFPQ/CBX3/TRIM28/APEX1/TAF9/TAF10/TAF1D/NFE2L2/TCEA1/CBX5/GTF2A2/NONO/HDGF/RBBP4/RBBP7/CEBPZ	24
GO:0000220	CC	GO:0000220	vacuolar proton-transporting V-type ATPase, V0 domain	3/502	10/19594	0.00175379	0.00891787	0.00613044	RNASEK/ATP6V0C/ATP6V0B	3
GO:0000346	CC	GO:0000346	transcription export complex	3/502	10/19594	0.00175379	0.00891787	0.00613044	ALYREF/DDX39B/THOC2	3
GO:0035145	CC	GO:0035145	exon-exon junction complex	3/502	10/19594	0.00175379	0.00891787	0.00613044	UPF3A/EIF4A3/RBM8A	3
GO:0072588	CC	GO:0072588	box H/ACA RNP complex	3/502	10/19594	0.00175379	0.00891787	0.00613044	NOLC1/DKC1/NHP2	3
GO:0000792	CC	GO:0000792	heterochromatin	7/502	69/19594	0.00190358	0.00958905	0.00659183	HMGA1/CDKN2A/DNMT1/CBX3/TRIM28/CBX5/TCP1	7
GO:0005874	CC	GO:0005874	microtubule	22/502	435/19594	0.00202897	0.0101261	0.00696099	TUBA1B/CCT6A/CCT5/TPX2/KIF20B/CDK1/HSPH1/HNRNPU/TUBA1C/EIF3A/CCT2/GABARAP/TUBB4B/CCT3/TUBB/CCT8/TCP1/NUDC/LRPPRC/CLTC/KIF5B/CCT4	22
GO:0005766	CC	GO:0005766	primary lysosome	11/502	155/19594	0.00220709	0.0108148	0.00743442	FABP5/PA2G4/ATP6V0C/CCT2/TUBB4B/PSMD1/ANXA2/CD63/TUBB/CCT8/LAMP1	11
GO:0042582	CC	GO:0042582	azurophil granule	11/502	155/19594	0.00220709	0.0108148	0.00743442	FABP5/PA2G4/ATP6V0C/CCT2/TUBB4B/PSMD1/ANXA2/CD63/TUBB/CCT8/LAMP1	11
GO:0035578	CC	GO:0035578	azurophil granule lumen	8/502	91/19594	0.00232379	0.011284	0.00775698	FABP5/PA2G4/CCT2/TUBB4B/PSMD1/ANXA2/TUBB/CCT8	8
GO:0031074	CC	GO:0031074	nucleocytoplasmic transport complex	3/502	11/19594	0.00236581	0.0113855	0.00782674	KPNB1/RAN/KPNA2	3
GO:0000118	CC	GO:0000118	histone deacetylase complex	7/502	72/19594	0.00243426	0.0116112	0.00798191	CHD4/CBX5/ANP32E/RBBP4/RBBP7/SINHCAF/RUVBL1	7
GO:0071682	CC	GO:0071682	endocytic vesicle lumen	4/502	23/19594	0.00255978	0.0121028	0.00831988	HSP90AA1/HSP90B1/CALR/HSPH1	4
GO:0030867	CC	GO:0030867	rough endoplasmic reticulum membrane	4/502	24/19594	0.00301029	0.0139007	0.00955578	RPS26/RPS29/SSR4/ARL6IP1	4
GO:0033179	CC	GO:0033179	proton-transporting V-type ATPase, V0 domain	3/502	12/19594	0.00309477	0.0139007	0.00955578	RNASEK/ATP6V0C/ATP6V0B	3
GO:0071006	CC	GO:0071006	U2-type catalytic step 1 spliceosome	3/502	12/19594	0.00309477	0.0139007	0.00955578	PRPF8/EIF4A3/RBM8A	3
GO:0071012	CC	GO:0071012	catalytic step 1 spliceosome	3/502	12/19594	0.00309477	0.0139007	0.00955578	PRPF8/EIF4A3/RBM8A	3
GO:1990062	CC	GO:1990062	RPAP3/R2TP/prefoldin-like complex	3/502	12/19594	0.00309477	0.0139007	0.00955578	PFDN2/URI1/RUVBL1	3
GO:1990124	CC	GO:1990124	messenger ribonucleoprotein complex	3/502	12/19594	0.00309477	0.0139007	0.00955578	YBX1/HNRNPAB/HNRNPA3	3
GO:0005819	CC	GO:0005819	spindle	20/502	402/19594	0.0038205	0.0170186	0.0116991	NPM1/CIAO2B/CENPF/CCNB1/TPX2/UMOD/KIF20B/CDK1/SMC1A/RPS3/HNRNPU/SEPTIN2/CENPV/SMC3/MZT2A/CBX3/TAF1D/NUDC/CLTC/JTB	20
GO:0005736	CC	GO:0005736	RNA polymerase I complex	3/502	13/19594	0.00394723	0.0171577	0.0117948	POLR1D/POLR2F/POLR2H	3
GO:0031010	CC	GO:0031010	ISWI-type complex	3/502	13/19594	0.00394723	0.0171577	0.0117948	SMARCA5/RBBP4/RBBP7	3
GO:0044194	CC	GO:0044194	cytolytic granule	3/502	13/19594	0.00394723	0.0171577	0.0117948	CALR/LAMP1/SERPINB1	3
GO:0031301	CC	GO:0031301	integral component of organelle membrane	19/502	382/19594	0.00475722	0.0205131	0.0141014	MICOS10/MICOS13/CALR/HSPA5/TOMM40/KTN1/PDIA3/COX16/PET100/HLA-A/HSPA9/UQCC3/HLA-C/CHCHD3/TECR/CANX/TOMM20/IMMT/ARL6IP1	19
GO:0016581	CC	GO:0016581	NuRD complex	3/502	14/19594	0.00492901	0.0209192	0.0143805	CHD4/RBBP4/RBBP7	3
GO:0090545	CC	GO:0090545	CHD-type complex	3/502	14/19594	0.00492901	0.0209192	0.0143805	CHD4/RBBP4/RBBP7	3
GO:0001772	CC	GO:0001772	immunological synapse	5/502	44/19594	0.00515903	0.0217243	0.014934	CD81/LGALS3/STOML2/ARHGDIA/EZR	5
GO:0071556	CC	GO:0071556	integral component of lumenal side of endoplasmic reticulum membrane	4/502	29/19594	0.00608362	0.0251981	0.017322	CALR/HLA-A/HLA-C/CANX	4
GO:0098553	CC	GO:0098553	lumenal side of endoplasmic reticulum membrane	4/502	29/19594	0.00608362	0.0251981	0.017322	CALR/HLA-A/HLA-C/CANX	4
GO:0000228	CC	GO:0000228	nuclear chromosome	13/502	228/19594	0.00612421	0.0251981	0.017322	TOP2A/SMC1A/HNRNPU/PCNA/SMC3/SMARCA5/LRPPRC/ANP32E/NIFK/RBBP4/TOP1/SINHCAF/RUVBL1	13
GO:0090575	CC	GO:0090575	RNA polymerase II transcription regulator complex	13/502	230/19594	0.00657473	0.0268468	0.0184554	HMGA1/HNRNPAB/CHD4/SFPQ/CBX3/TRIM28/TAF9/TAF10/NFE2L2/TCEA1/GTF2A2/NONO/CEBPZ	13
GO:0032839	CC	GO:0032839	dendrite cytoplasm	4/502	30/19594	0.00687992	0.0278818	0.0191668	HNRNPU/SFPQ/KIF5B/CANX	4
GO:0061695	CC	GO:0061695	transferase complex, transferring phosphorus-containing groups	14/502	259/19594	0.00718491	0.0289005	0.0198672	CCNB1/XRCC5/PRKDC/CDK1/PCNA/CCND1/POLR1D/TAF9/TAF10/POLR2F/TCEA1/GTF2A2/POLR2H/CKS1B	14
GO:0000307	CC	GO:0000307	cyclin-dependent protein kinase holoenzyme complex	5/502	49/19594	0.0081634	0.0325931	0.0224056	CCNB1/CDK1/PCNA/CCND1/CKS1B	5
GO:0072686	CC	GO:0072686	mitotic spindle	10/502	160/19594	0.00832852	0.0330079	0.0226907	TPX2/KIF20B/CDK1/SMC1A/RPS3/HNRNPU/SMC3/TAF1D/NUDC/CLTC	10
GO:0045335	CC	GO:0045335	phagocytic vesicle	9/502	138/19594	0.00923401	0.0363294	0.024974	ATP6V0C/CALR/ACTG1/PDIA3/HLA-A/ATP6V0B/HLA-C/LAMP1/KIF5B	9
GO:0005669	CC	GO:0005669	transcription factor TFIID complex	4/502	33/19594	0.00967295	0.0377806	0.0259716	TAF9/TAF10/TCEA1/GTF2A2	4
GO:0000932	CC	GO:0000932	P-body	7/502	93/19594	0.00991976	0.0384658	0.0264427	PSMA6/LSM4/CAPRIN1/LSM6/PSMA2/LSM2/TOP1	7
GO:0005666	CC	GO:0005666	RNA polymerase III complex	3/502	18/19594	0.0102421	0.0393732	0.0270664	POLR1D/POLR2F/POLR2H	3
GO:0031300	CC	GO:0031300	intrinsic component of organelle membrane	19/502	412/19594	0.0102998	0.0393732	0.0270664	MICOS10/MICOS13/CALR/HSPA5/TOMM40/KTN1/PDIA3/COX16/PET100/HLA-A/HSPA9/UQCC3/HLA-C/CHCHD3/TECR/CANX/TOMM20/IMMT/ARL6IP1	19
GO:0098576	CC	GO:0098576	lumenal side of membrane	4/502	35/19594	0.0118917	0.0451383	0.0310296	CALR/HLA-A/HLA-C/CANX	4
GO:0090734	CC	GO:0090734	site of DNA damage	7/502	97/19594	0.0123379	0.0465043	0.0319686	XRCC5/PARP1/CBX3/ARPC2/ARPC5/CBX5/LMNA	7
GO:0016591	CC	GO:0016591	RNA polymerase II, holoenzyme	6/502	76/19594	0.0132506	0.0495977	0.0340951	TAF9/TAF10/POLR2F/TCEA1/GTF2A2/POLR2H	6
GO:0003735	MF	GO:0003735	structural constituent of ribosome	42/499	181/18410	2.38813e-27	1.47109e-24	1.22926e-24	RPL36A/RPL17/RPS21/RPS2/RPS24/RPL39/RPL18/RPS12/RPL37/MRPS24/RPS17/RPL30/RPS23/RPS26/RPS19/RPS3/RPL7A/MRPS17/RPL38/RPSA/RPL26/RPL35A/RPS29/MRPS18C/MRPL20/RPS13/MRPL12/RPL6/MRPL17/MRPL3/RPL5/MRPS12/MRPL9/MRPL37/MRPS2/NDUFA7/MRPL4/MRPL21/RPS10/MRPS34/MRPL18/RPL22L1	42
GO:0051082	MF	GO:0051082	unfolded protein binding	30/499	121/18410	9.54194e-21	2.93892e-18	2.45579e-18	HSP90AA1/HSP90AB1/NPM1/CCT6A/HSPD1/HSP90B1/CCT5/PPIB/CALR/HSPA5/PTGES3/CCT2/TUBB4B/NACA/LMAN1/CCT3/PET100/PPIA/CCT8/HSPE1/TCP1/NUDC/HSPA9/PFDN2/TRAP1/CDC37/CANX/TOMM20/CCT4/SRSF10	30
GO:0045296	MF	GO:0045296	cadherin binding	46/499	333/18410	6.71114e-20	1.37802e-17	1.15149e-17	RPS2/KRT18/HSP90AB1/EEF1G/NOP56/RPS26/SERBP1/EPCAM/RPL7A/SEPTIN2/HSPA5/ARGLU1/RANBP1/YWHAB/CD46/PKM/KTN1/RAN/TMPO/ITGB1/BZW2/ANXA2/PAICS/YWHAE/HNRNPK/SLC3A2/YWHAZ/ZC3H15/CCT8/CAPZA1/RPL6/BSG/NUDC/DDX3X/EZR/AHSA1/PCMT1/EIF4H/EIF5/KIF5B/LDHA/EIF4G2/RUVBL1/BZW1/EIF2S3/PAK2	46
GO:0043021	MF	GO:0043021	ribonucleoprotein complex binding	24/499	150/18410	2.34231e-12	3.60716e-10	3.01418e-10	EIF5A/NPM1/SNRPB/C1QBP/SERBP1/HNRNPU/HSPA5/NEAT1/RPSA/DDX5/NOLC1/EIF4B/NME1/SNRPG/SNRPD1/TMEM147/CBX5/SRP19/DDX3X/MALSU1/SRP72/EIF4H/EIF4A3/ABCE1	24
GO:0003743	MF	GO:0003743	translation initiation factor activity	15/499	51/18410	3.30649e-12	3.8388e-10	3.20774e-10	EIF4A1/EIF3A/EIF1AX/EIF4B/EIF3F/EIF4G1/EIF3M/EIF3J/EIF3I/EIF4H/EIF5/EIF5B/EIF2S2/EIF4G2/EIF2S3	15
GO:0016887	MF	GO:0016887	ATP hydrolysis activity	35/499	325/18410	3.73909e-12	3.8388e-10	3.20774e-10	HSP90AA1/HSP90AB1/CCT6A/EIF4A1/HSPD1/HSP90B1/CCT5/KIF20B/SMC1A/HSPH1/DDX39B/HSPA5/CCT2/DDX21/DDX5/CHD4/SMC3/CCT3/DDX46/CCT8/HSPE1/SMARCA5/TCP1/HSPA9/DDX3X/HSPA4/DDX27/TRAP1/DDX1/DDX24/EIF4A3/KIF5B/RUVBL1/RFC1/CCT4	35
GO:0008135	MF	GO:0008135	translation factor activity, RNA binding	18/499	84/18410	8.38112e-12	7.37539e-10	6.16296e-10	EEF1G/EIF5A/EIF4A1/EIF3A/EIF1AX/EIF4B/EIF3F/EIF4G1/EIF3M/EIF3J/EEF1B2/EIF3I/EIF4H/EIF5/EIF5B/EIF2S2/EIF4G2/EIF2S3	18
GO:0044183	MF	GO:0044183	protein folding chaperone	13/499	43/18410	6.35327e-11	4.89202e-09	4.08783e-09	HSP90AA1/HSP90AB1/CCT6A/CCT5/CALR/HSPA5/CCT2/CCT3/CCT8/TCP1/HSPA9/PFDN2/CCT4	13
GO:0090079	MF	GO:0090079	translation regulator activity, nucleic acid binding	18/499	108/18410	6.72977e-10	4.60615e-08	3.84896e-08	EEF1G/EIF5A/EIF4A1/EIF3A/EIF1AX/EIF4B/EIF3F/EIF4G1/EIF3M/EIF3J/EEF1B2/EIF3I/EIF4H/EIF5/EIF5B/EIF2S2/EIF4G2/EIF2S3	18
GO:0003725	MF	GO:0003725	double-stranded RNA binding	15/499	75/18410	1.30033e-09	8.01006e-08	6.6933e-08	TUBA1B/HSP90AB1/EIF4A1/HSPD1/MTDH/HNRNPU/DDX21/TUBB4B/EIF4B/SLC3A2/ILF3/DDX1/ILF2/CLTC/EIF4H	15
GO:0030515	MF	GO:0030515	snoRNA binding	10/499	32/18410	7.38731e-09	4.13689e-07	3.45684e-07	NOP56/XRCC5/PRKDC/DDX21/NOLC1/DKC1/NHP2/NUDT5/SNU13/NUDT4	10
GO:0017069	MF	GO:0017069	snRNA binding	12/499	53/18410	1.33921e-08	6.87463e-07	5.74452e-07	EIF5A/HNRNPU/DDX39B/SF3B3/PRPF8/DDX21/LSM7/SNU13/LSM4/SNRPA1/LSM2/LSM8	12
GO:0044389	MF	GO:0044389	ubiquitin-like protein ligase binding	28/499	317/18410	4.56487e-08	2.16305e-06	1.80747e-06	HSP90AA1/TUBA1B/HSP90AB1/HSPD1/PA2G4/CCNB1/XRCC5/ATP6V0C/UBE2C/CALR/HSPA5/ACTG1/NAE1/CCT2/GABARAP/PSMA3/PSMD1/TRIM28/YWHAE/TUBB/YWHAZ/RPL5/TCP1/HSPA9/LRPPRC/UBE2K/GPI/CACYBP	28
GO:0017070	MF	GO:0017070	U6 snRNA binding	7/499	16/18410	9.53886e-08	4.1971e-06	3.50715e-06	EIF5A/DDX39B/PRPF8/LSM7/LSM4/LSM2/LSM8	7
GO:0031625	MF	GO:0031625	ubiquitin protein ligase binding	26/499	298/18410	1.7679e-07	6.90946e-06	5.77362e-06	HSP90AA1/TUBA1B/HSP90AB1/HSPD1/PA2G4/XRCC5/ATP6V0C/CALR/HSPA5/ACTG1/NAE1/CCT2/GABARAP/PSMA3/PSMD1/TRIM28/YWHAE/TUBB/YWHAZ/RPL5/TCP1/HSPA9/LRPPRC/UBE2K/GPI/CACYBP	26
GO:0019843	MF	GO:0019843	rRNA binding	12/499	66/18410	1.79466e-07	6.90946e-06	5.77362e-06	RPL37/RPS3/MRPS17/DDX21/GTF3A/MRPS18C/MRPL20/RPS13/RPF2/RPL5/BRIX1/MRPL18	12
GO:0043024	MF	GO:0043024	ribosomal small subunit binding	6/499	17/18410	3.69314e-06	0.000132137	0.000110416	NPM1/EIF4B/NME1/DDX3X/EIF4H/ABCE1	6
GO:0003727	MF	GO:0003727	single-stranded RNA binding	12/499	87/18410	3.86116e-06	0.000132137	0.000110416	HNRNPU/HNRNPH1/EIF4B/SSB/ILF3/HNRNPF/HNRNPDL/DDX3X/DDX1/EIF4H/EIF4A3/HNRNPC	12
GO:0140297	MF	GO:0140297	DNA-binding transcription factor binding	31/499	470/18410	5.23819e-06	0.000169828	0.00014191	NCL/HMGB1/HMGA1/PTMA/NPM1/CENPF/CHCHD2/CDKN2A/HES6/LYAR/MTDH/PRKDC/RPS3/CALR/PSMA6/HMGB2/PARP1/PCNA/DDX5/PHB2/CHD4/APEX1/TAF9/TAF10/YWHAZ/NFE2L2/CBX5/GTF2A2/NUCKS1/GTF2I/ACTN4	31
GO:0048027	MF	GO:0048027	mRNA 5'-UTR binding	7/499	27/18410	5.71435e-06	0.000176002	0.000147069	NCL/CCT5/RPL26/RPS13/RPL5/DDX3X/GNL3	7
GO:0031491	MF	GO:0031491	nucleosome binding	10/499	67/18410	1.2136e-05	0.000355989	0.000297469	SUPT16H/SSRP1/CHD4/SMARCC1/HP1BP3/SMARCA5/RBBP4/HMGN1/HMGN2/HNRNPC	10
GO:0042393	MF	GO:0042393	histone binding	20/499	250/18410	1.68943e-05	0.00047304	0.000395278	PTMA/NPM1/SET/NASP/DEK/ANP32B/SSRP1/CHD4/CBX3/SMARCC1/BRD7/CBX5/SMARCA5/CKS1B/ANP32E/NPM3/RBBP4/RBBP7/NAP1L1/PTMS	20
GO:0031369	MF	GO:0031369	translation initiation factor binding	7/499	32/18410	1.92591e-05	0.000515808	0.000431015	RPS24/EIF3F/EIF4G1/EIF3M/DDX3X/EIF5/EIF2S2	7
GO:0140097	MF	GO:0140097	catalytic activity, acting on DNA	18/499	222/18410	3.70752e-05	0.000943372	0.000788293	TOP2A/XRCC5/DNMT1/RPS3/PTGES3/PCNA/CHD4/SMC3/DKC1/APEX1/NME1/SMARCA5/DDX3X/DDX1/RBBP4/TOP1/RUVBL1/RFC1	18
GO:0042826	MF	GO:0042826	histone deacetylase binding	13/499	126/18410	3.82862e-05	0.000943372	0.000788293	HSP90AA1/HSP90AB1/TOP2A/HNRNPD/YWHAB/PARP1/CHD4/CCND1/SFPQ/YWHAE/KPNA2/CBX5/RBBP4	13
GO:0003724	MF	GO:0003724	RNA helicase activity	10/499	77/18410	4.21526e-05	0.000998692	0.000834519	EIF4A1/DDX39B/DDX21/DDX5/DDX46/DDX3X/DDX27/DDX1/DDX24/EIF4A3	10
GO:0008186	MF	GO:0008186	ATP-dependent activity, acting on RNA	10/499	79/18410	5.27488e-05	0.00120345	0.00100562	EIF4A1/DDX39B/DDX21/DDX5/DDX46/DDX3X/DDX27/DDX1/DDX24/EIF4A3	10
GO:0023026	MF	GO:0023026	MHC class II protein complex binding	6/499	27/18410	7.01403e-05	0.00154309	0.00128942	HSP90AA1/HSP90AB1/CD81/PKM/YWHAE/ATP1B1	6
GO:0004386	MF	GO:0004386	helicase activity	14/499	155/18410	8.49874e-05	0.00180525	0.00150849	EIF4A1/XRCC5/DDX39B/DDX21/DDX5/CHD4/DDX46/SMARCA5/DDX3X/DDX27/DDX1/DDX24/EIF4A3/RUVBL1	14
GO:0008097	MF	GO:0008097	5S rRNA binding	4/499	10/18410	9.83479e-05	0.00201941	0.00168744	GTF3A/RPF2/RPL5/MRPL18	4
GO:0003697	MF	GO:0003697	single-stranded DNA binding	12/499	120/18410	0.000102407	0.00203492	0.0017004	HMGB1/HSPD1/YBX1/HNRNPA2B1/HNRNPU/HMGB2/POLR2H/RAD23A/LRPPRC/NUCKS1/TOP1/SSBP1	12
GO:0031072	MF	GO:0031072	heat shock protein binding	12/499	123/18410	0.000129858	0.00249976	0.00208883	HSP90AB1/CDK1/RPS3/TFAM/HSPA5/PTGES3/KPNB1/DNAJC7/HSPA9/AHSA1/CDC37/STIP1	12
GO:0034511	MF	GO:0034511	U3 snoRNA binding	4/499	11/18410	0.000151239	0.00282313	0.00235904	XRCC5/PRKDC/NHP2/SNU13	4
GO:0001618	MF	GO:0001618	virus receptor activity	9/499	76/18410	0.00020885	0.00378387	0.00316185	CD81/CDK1/SLC1A5/RPSA/CD46/SIVA1/ITGB1/BSG/LAMP1	9
GO:0140272	MF	GO:0140272	exogenous protein binding	9/499	77/18410	0.000230913	0.00406407	0.00339599	CD81/CDK1/SLC1A5/RPSA/CD46/SIVA1/ITGB1/BSG/LAMP1	9
GO:0070034	MF	GO:0070034	telomerase RNA binding	5/499	22/18410	0.000257684	0.00429009	0.00358485	SNRPB/HNRNPU/DKC1/NHP2/HNRNPC	5
GO:0070182	MF	GO:0070182	DNA polymerase binding	5/499	22/18410	0.000257684	0.00429009	0.00358485	HSP90AA1/HSP90AB1/HMGB1/PTGES3/PCNA	5
GO:0008143	MF	GO:0008143	poly(A) binding	5/499	23/18410	0.000321978	0.00521943	0.00436141	HNRNPU/HNRNPDL/DDX3X/DDX1/EIF4A3	5
GO:0023023	MF	GO:0023023	MHC protein complex binding	6/499	36/18410	0.000375398	0.00592936	0.00495464	HSP90AA1/HSP90AB1/CD81/PKM/YWHAE/ATP1B1	6
GO:0001091	MF	GO:0001091	RNA polymerase II general transcription initiation factor binding	5/499	24/18410	0.000397716	0.00612482	0.00511797	HNRNPU/NOLC1/FBL/GTF2A2/RUVBL1	5
GO:0044548	MF	GO:0044548	S100 protein binding	4/499	14/18410	0.000429983	0.00642275	0.00536692	S100A6/ANXA2/EZR/CACYBP	4
GO:0042162	MF	GO:0042162	telomeric DNA binding	6/499	37/18410	0.000437915	0.00642275	0.00536692	NCL/XRCC5/HNRNPD/HNRNPA2B1/APEX1/UPF3A	6
GO:0008094	MF	GO:0008094	ATP-dependent activity, acting on DNA	10/499	103/18410	0.000484668	0.00694315	0.00580178	TOP2A/XRCC5/CHD4/SMC3/SMARCA5/DDX3X/DDX1/RBBP4/RUVBL1/RFC1	10
GO:0043022	MF	GO:0043022	ribosome binding	8/499	70/18410	0.000595437	0.00833612	0.00696576	EIF5A/C1QBP/SERBP1/HSPA5/RPSA/TMEM147/SRP19/SRP72	8
GO:0031492	MF	GO:0031492	nucleosomal DNA binding	6/499	40/18410	0.000675086	0.00924118	0.00772204	CHD4/SMARCC1/RBBP4/HMGN1/HMGN2/HNRNPC	6
GO:0046982	MF	GO:0046982	protein heterodimerization activity	20/499	332/18410	0.00077651	0.0103985	0.00868909	TPM2/TOP2A/CENPW/SMC1A/NAE1/RAN/NOLC1/PHB2/SMC3/ITGB1/KRT10/YWHAE/TAF9/TPM4/GTF2A2/ATP1B1/PAFAH1B3/LSM6/PSMF1/LSM5	20
GO:0001098	MF	GO:0001098	basal transcription machinery binding	8/499	74/18410	0.000865174	0.0111031	0.00927786	HNRNPU/WDR43/NOLC1/FBL/GTF2A2/LLPH/URI1/RUVBL1	8
GO:0001099	MF	GO:0001099	basal RNA polymerase II transcription machinery binding	8/499	74/18410	0.000865174	0.0111031	0.00927786	HNRNPU/WDR43/NOLC1/FBL/GTF2A2/LLPH/URI1/RUVBL1	8
GO:0008301	MF	GO:0008301	DNA binding, bending	4/499	17/18410	0.000958381	0.0118609	0.00991113	HMGB1/TOP2A/TFAM/HMGB2	4
GO:0003713	MF	GO:0003713	transcription coactivator activity	17/499	266/18410	0.000992715	0.0118609	0.00991113	NME2/HMGB1/HMGA1/NPM1/MTDH/HMGB2/FUS/TRIM28/APEX1/TAF9/SMARCC1/BRD7/NUCKS1/CEBPZ/PCBD1/ACTN4/RUVBL1	17
GO:0070717	MF	GO:0070717	poly-purine tract binding	5/499	29/18410	0.000993896	0.0118609	0.00991113	HNRNPU/HNRNPDL/DDX3X/DDX1/EIF4A3	5
GO:0051879	MF	GO:0051879	Hsp90 protein binding	6/499	43/18410	0.00100125	0.0118609	0.00991113	RPS3/PTGES3/KPNB1/AHSA1/CDC37/STIP1	6
GO:0051059	MF	GO:0051059	NF-kappaB binding	5/499	31/18410	0.00136012	0.0156884	0.0131094	NPM1/CDKN2A/MTDH/PSMA6/APEX1	5
GO:0061629	MF	GO:0061629	RNA polymerase II-specific DNA-binding transcription factor binding	20/499	348/18410	0.00137528	0.0156884	0.0131094	HMGB1/HMGA1/NPM1/CDKN2A/HES6/MTDH/PRKDC/CALR/PSMA6/PARP1/PCNA/DDX5/PHB2/CHD4/APEX1/TAF10/NFE2L2/GTF2A2/GTF2I/ACTN4	20
GO:0098631	MF	GO:0098631	cell adhesion mediator activity	7/499	64/18410	0.00168573	0.0188801	0.0157765	KRT18/DSP/EPCAM/RPSA/ITGB1/ANXA2/BSG	7
GO:0019212	MF	GO:0019212	phosphatase inhibitor activity	6/499	49/18410	0.00200328	0.0217559	0.0181795	PPP1R14B/SET/LGALS3/PPP1R2/ANP32E/URI1	6
GO:0050786	MF	GO:0050786	RAGE receptor binding	3/499	10/18410	0.00206045	0.0217559	0.0181795	S100A4/HMGB1/HMGB2	3
GO:0005200	MF	GO:0005200	structural constituent of cytoskeleton	9/499	104/18410	0.00206965	0.0217559	0.0181795	KRT19/TUBA1B/DSP/TUBA1C/ACTG1/TUBB4B/ARPC2/TUBB/ARPC5	9
GO:0035198	MF	GO:0035198	miRNA binding	5/499	34/18410	0.00208377	0.0217559	0.0181795	YBX1/KCNQ1OT1/HNRNPA2B1/NEAT1/DDX21	5
GO:0140098	MF	GO:0140098	catalytic activity, acting on RNA	21/499	388/18410	0.00219675	0.0219645	0.0183538	RNASEK/EIF4A1/DDX39B/DUS1L/DDX21/DDX5/APEX1/NOB1/FBL/POLR1D/DDX46/POLR2F/POLR2H/DDX3X/DDX27/XRN2/DDX1/DDX24/EIF4A3/POP7/METTL5	21
GO:0031490	MF	GO:0031490	chromatin DNA binding	9/499	105/18410	0.00221072	0.0219645	0.0183538	HNRNPU/CHD4/APEX1/SMARCC1/RBBP4/HMGN1/ACTN4/HMGN2/HNRNPC	9
GO:0047485	MF	GO:0047485	protein N-terminus binding	9/499	105/18410	0.00221072	0.0219645	0.0183538	RPS21/EIF5A/PARP1/PHB2/SRRM2/BANF1/SMARCC1/PPP1CC/ACTN4	9
GO:0051087	MF	GO:0051087	chaperone binding	9/499	106/18410	0.00235933	0.0227273	0.0189912	HSPD1/CALR/HSPA5/PTGES3/SDF2L1/HSPE1/AHSA1/SUGT1/CDC37	9
GO:0003712	MF	GO:0003712	transcription coregulator activity	25/499	497/18410	0.00237589	0.0227273	0.0189912	NME2/HMGB1/HMGA1/NPM1/PA2G4/C1QBP/MTDH/HNRNPU/HMGB2/BCLAF1/CCND1/FUS/TRIM28/APEX1/TAF9/SMARCC1/BRD7/NUCKS1/DDX1/HDGF/CEBPZ/PCBD1/ACTN4/URI1/RUVBL1	25
GO:0003684	MF	GO:0003684	damaged DNA binding	7/499	68/18410	0.00239817	0.0227273	0.0189912	HMGB1/XRCC5/RPS3/HMGB2/PCNA/APEX1/RAD23A	7
GO:0047429	MF	GO:0047429	nucleoside-triphosphate diphosphatase activity	3/499	11/18410	0.0027764	0.0259131	0.0216533	ITPA/DCTPP1/DUT	3
GO:0000287	MF	GO:0000287	magnesium ion binding	14/499	222/18410	0.00303626	0.0279154	0.0233265	TOP2A/PKM/RAN/NUDT5/PAPOLA/NME1/TKT/PPA1/DCTPP1/PDXK/GSS/DUT/ARF1/PDCD6	14
GO:0016853	MF	GO:0016853	isomerase activity	11/499	155/18410	0.00338593	0.0306725	0.0256303	HSPD1/TOP2A/FKBP11/PPIB/PTGES3/MIF/DKC1/PDIA3/PPIA/GPI/TOP1	11
GO:0008022	MF	GO:0008022	protein C-terminus binding	12/499	179/18410	0.00359797	0.0319252	0.0266771	NCL/CENPF/TOP2A/MKI67/XRCC5/PRRC2C/PCNA/PHB2/BANF1/PPP1CC/ATP1B1/EZR	12
GO:1990226	MF	GO:1990226	histone methyltransferase binding	3/499	12/18410	0.00362786	0.0319252	0.0266771	HSP90AB1/NOP56/CBX3	3
GO:0140666	MF	GO:0140666	annealing activity	3/499	13/18410	0.00462207	0.0401014	0.0335092	EIF4B/DDX3X/EIF4H	3
GO:0048487	MF	GO:0048487	beta-tubulin binding	5/499	41/18410	0.00480631	0.0411207	0.0343609	CCT5/GABARAP/SMC3/PDCD5/LRPPRC	5
GO:0043236	MF	GO:0043236	laminin binding	4/499	27/18410	0.0057056	0.0481459	0.0402313	LGALS3/RPSA/ITGB1/LGALS1	4

## Sheet: PT
	ONTOLOGY	ID	Description	GeneRatio	BgRatio	pvalue	p.adjust	qvalue	geneID	Count
GO:0044282	BP	GO:0044282	small molecule catabolic process	23/299	376/18800	3.97e-08	0.0001267	0.00011089	MIOX/MTLN/AMACR/TST/CYP4F3/ALDH6A1/AFMID/GLS/ABCD3/ACADSB/ABAT/MCCC2/AGXT2/PAH/ACOX1/GNPDA1/PNP/ALDH4A1/GK/TKFC/ALDH1B1/PIPOX/DDAH1	23
GO:0016054	BP	GO:0016054	organic acid catabolic process	18/299	242/18800	6.84e-08	0.0001267	0.00011089	MTLN/AMACR/TST/CYP4F3/ALDH6A1/AFMID/GLS/ABCD3/ACADSB/ABAT/MCCC2/AGXT2/PAH/ACOX1/GNPDA1/ALDH4A1/PIPOX/DDAH1	18
GO:0006091	BP	GO:0006091	generation of precursor metabolites and energy	26/299	494/18800	1.04e-07	0.00012808	0.00011209	AK4/ATP5F1E/MTLN/ANTKMT/PPP1CB/NDUFA7/SUCLG1/OGDH/ACO1/KL/PRKAA2/AVP/OGDHL/NDUFA13/COX8A/IDH1/SLC4A4/ENTPD5/PGLS/ACOX1/MAOB/GNPDA1/ALDH4A1/PHB2/INSR/PPP1R1A	26
GO:0046395	BP	GO:0046395	carboxylic acid catabolic process	17/299	238/18800	2.84e-07	0.00026296	0.00023014	MTLN/AMACR/CYP4F3/ALDH6A1/AFMID/GLS/ABCD3/ACADSB/ABAT/MCCC2/AGXT2/PAH/ACOX1/GNPDA1/ALDH4A1/PIPOX/DDAH1	17
GO:1901605	BP	GO:1901605	alpha-amino acid metabolic process	15/299	203/18800	9.37e-07	0.00069377	0.00060719	AGMAT/TST/BHMT2/ALDH6A1/AFMID/HNF4A/GLS/ACADSB/ASS1/MCCC2/AGXT2/PAH/ALDH4A1/PIPOX/DDAH1	15
GO:0009063	BP	GO:0009063	cellular amino acid catabolic process	11/299	112/18800	1.73e-06	0.00106773	0.00093448	ALDH6A1/AFMID/GLS/ACADSB/ABAT/MCCC2/AGXT2/PAH/ALDH4A1/PIPOX/DDAH1	11
GO:1901606	BP	GO:1901606	alpha-amino acid catabolic process	10/299	94/18800	2.48e-06	0.00127282	0.00111398	ALDH6A1/AFMID/GLS/ACADSB/MCCC2/AGXT2/PAH/ALDH4A1/PIPOX/DDAH1	10
GO:0006520	BP	GO:0006520	cellular amino acid metabolic process	17/299	285/18800	3.43e-06	0.00127282	0.00111398	AGMAT/ACY1/TST/BHMT2/ALDH6A1/AFMID/HNF4A/GLS/ACADSB/ASS1/ABAT/MCCC2/AGXT2/PAH/ALDH4A1/PIPOX/DDAH1	17
GO:0019058	BP	GO:0019058	viral life cycle	18/299	317/18800	3.54e-06	0.00127282	0.00111398	RNASEK/PCBP2/CD81/AVP/PCBP1/HSPA1B/NFIA/RAB1B/CDC42/ITGB1/ANPEP/STAU1/TRIM6/CTSL/HSPA1A/DDX3X/INSR/CTSB	18
GO:0009259	BP	GO:0009259	ribonucleotide metabolic process	20/299	384/18800	3.77e-06	0.00127282	0.00111398	AK4/ATP6V0C/NME2/ATP5F1E/ANTKMT/OGDH/PRKAA2/OGDHL/NUDT4/ACOT2/ATP6V1A/MCCC2/SLC4A4/ENTPD5/ACSL1/PNP/SLC25A1/INSR/DPYS/PIPOX	20
GO:0016032	BP	GO:0016032	viral process	21/299	418/18800	3.78e-06	0.00127282	0.00111398	RNASEK/PCBP2/CD81/AVP/PCBP1/HSPA1B/NFIA/CANX/RAB1B/CDC42/ITGB1/ANPEP/STAU1/TRIM6/CTSL/HSPA1A/DDX3X/INSR/CSNK1A1/CSDE1/CTSB	21
GO:0019693	BP	GO:0019693	ribose phosphate metabolic process	20/299	394/18800	5.54e-06	0.00170979	0.00149641	AK4/ATP6V0C/NME2/ATP5F1E/ANTKMT/OGDH/PRKAA2/OGDHL/NUDT4/ACOT2/ATP6V1A/MCCC2/SLC4A4/ENTPD5/ACSL1/PNP/SLC25A1/INSR/DPYS/PIPOX	20
GO:0009150	BP	GO:0009150	purine ribonucleotide metabolic process	19/299	366/18800	6.94e-06	0.00197514	0.00172865	AK4/ATP6V0C/NME2/ATP5F1E/ANTKMT/OGDH/PRKAA2/OGDHL/NUDT4/ACOT2/ATP6V1A/MCCC2/SLC4A4/ENTPD5/ACSL1/PNP/SLC25A1/INSR/PIPOX	19
GO:0046034	BP	GO:0046034	ATP metabolic process	16/299	273/18800	8.33e-06	0.00220213	0.00192731	AK4/ATP6V0C/ATP5F1E/ANTKMT/ATP1B1/NDUFA7/OGDH/PRKAA2/OGDHL/HSPA1B/ATP6V1A/SLC4A4/ENTPD5/HSPA1A/INSR/ATP6V1B2	16
GO:0006898	BP	GO:0006898	receptor-mediated endocytosis	15/299	246/18800	9.97e-06	0.00246133	0.00215417	CUBN/RNASEK/LRP2/APOC2/CD81/EZR/RAB21/CANX/CLTC/WASL/ITGB1/CTSL/AP2B1/INSR/PICALM	15
GO:0070482	BP	GO:0070482	response to oxygen levels	17/299	324/18800	1.85e-05	0.00425244	0.00372175	AK4/CPEB4/VEGFB/ATP1B1/NDRG1/ACTN4/ZFP36L1/THBS1/BIRC2/ATP6V1A/ABAT/HIPK2/PHB2/HSP90B1/TXN2/TMBIM6/DDAH1	17
GO:0006163	BP	GO:0006163	purine nucleotide metabolic process	19/299	394/18800	1.95e-05	0.00425244	0.00372175	AK4/ATP6V0C/NME2/ATP5F1E/ANTKMT/OGDH/PRKAA2/OGDHL/NUDT4/ACOT2/ATP6V1A/MCCC2/SLC4A4/ENTPD5/ACSL1/PNP/SLC25A1/INSR/PIPOX	19
GO:0046718	BP	GO:0046718	viral entry into host cell	11/299	146/18800	2.24e-05	0.0046031	0.00402864	RNASEK/CD81/AVP/HSPA1B/ITGB1/ANPEP/TRIM6/CTSL/HSPA1A/INSR/CTSB	11
GO:0036293	BP	GO:0036293	response to decreased oxygen levels	16/299	299/18800	2.57e-05	0.00499905	0.00437518	AK4/CPEB4/VEGFB/ATP1B1/NDRG1/ACTN4/ZFP36L1/THBS1/BIRC2/ABAT/HIPK2/PHB2/HSP90B1/TXN2/TMBIM6/DDAH1	16
GO:0016052	BP	GO:0016052	carbohydrate catabolic process	11/299	152/18800	3.25e-05	0.00585971	0.00512843	MIOX/PPP1CB/OGDH/ABHD10/PRKAA2/OGDHL/SLC4A4/ENTPD5/GK/INSR/TKFC	11
GO:0044409	BP	GO:0044409	entry into host	11/299	153/18800	3.46e-05	0.00585971	0.00512843	RNASEK/CD81/AVP/HSPA1B/ITGB1/ANPEP/TRIM6/CTSL/HSPA1A/INSR/CTSB	11
GO:0009410	BP	GO:0009410	response to xenobiotic stimulus	19/299	411/18800	3.48e-05	0.00585971	0.00512843	FMO4/THBS1/SLC22A12/CTNNB1/PRKAA2/HNF4A/CCND1/ABCD3/VAV3/ASS1/ABAT/MAOB/ACSL1/PNP/CMBL/TOP1/CALR/PRNP/TXN2	19
GO:0009117	BP	GO:0009117	nucleotide metabolic process	21/299	487/18800	3.76e-05	0.00604432	0.00529	AK4/ATP6V0C/NME2/ATP5F1E/ANTKMT/OGDH/AFMID/PRKAA2/OGDHL/NUDT4/ACOT2/ATP6V1A/MCCC2/SLC4A4/ENTPD5/ACSL1/PNP/SLC25A1/INSR/DPYS/PIPOX	21
GO:0072521	BP	GO:0072521	purine-containing compound metabolic process	19/299	416/18800	4.1e-05	0.00632573	0.0055363	AK4/ATP6V0C/NME2/ATP5F1E/ANTKMT/OGDH/PRKAA2/OGDHL/NUDT4/ACOT2/ATP6V1A/MCCC2/SLC4A4/ENTPD5/ACSL1/PNP/SLC25A1/INSR/PIPOX	19
GO:0006753	BP	GO:0006753	nucleoside phosphate metabolic process	21/299	495/18800	4.75e-05	0.00695735	0.00608909	AK4/ATP6V0C/NME2/ATP5F1E/ANTKMT/OGDH/AFMID/PRKAA2/OGDHL/NUDT4/ACOT2/ATP6V1A/MCCC2/SLC4A4/ENTPD5/ACSL1/PNP/SLC25A1/INSR/DPYS/PIPOX	21
GO:0006575	BP	GO:0006575	cellular modified amino acid metabolic process	12/299	188/18800	4.96e-05	0.00695735	0.00608909	EEF1G/GATM/BHMT2/CKB/IDH1/ASS1/CHDH/PCYOX1/ALDH4A1/GGACT/PIPOX/CTSB	12
GO:0010038	BP	GO:0010038	response to metal ion	17/299	351/18800	5.07e-05	0.00695735	0.00608909	CAPN3/NDRG1/JUND/CLIC4/THBS1/ACO1/PRKAA2/AOC1/LGMN/SEC31A/CCND1/ASS1/ABAT/MAOB/NEDD4L/CALR/PRNP	17
GO:0001666	BP	GO:0001666	response to hypoxia	15/299	286/18800	5.76e-05	0.00760952	0.00665987	AK4/VEGFB/ATP1B1/NDRG1/ACTN4/ZFP36L1/THBS1/BIRC2/ABAT/HIPK2/PHB2/HSP90B1/TXN2/TMBIM6/DDAH1	15
GO:0034063	BP	GO:0034063	stress granule assembly	5/299	27/18800	5.96e-05	0.00760952	0.00665987	PRKAA2/G3BP1/G3BP2/DDX3X/CSDE1	5
GO:0031331	BP	GO:0031331	positive regulation of cellular catabolic process	19/299	449/18800	0.00011267	0.0137779	0.0120585	GABARAP/MTLN/LRP2/APOC2/ZFP36L1/CD81/EZR/CELF1/PRKAA2/HSPA1B/RNF152/TOB1/SLC4A4/ENTPD5/TRIM6/HSPA1A/INSR/CSNK1A1/CSDE1	19
GO:0002181	BP	GO:0002181	cytoplasmic translation	10/299	146/18800	0.00011748	0.0137779	0.0120585	CPEB4/RPL39/RPL17/RPS28/RPS21/RPS10/RPL36A/RPS26/EIF4A1/CSDE1	10
GO:0006099	BP	GO:0006099	tricarboxylic acid cycle	5/299	31/18800	0.0001191	0.0137779	0.0120585	SUCLG1/OGDH/ACO1/OGDHL/IDH1	5
GO:1902916	BP	GO:1902916	positive regulation of protein polyubiquitination	4/299	17/18800	0.00012673	0.0140635	0.0123084	GABARAP/UBE2V1/BIRC2/DDX3X	4
GO:0052126	BP	GO:0052126	movement in host environment	11/299	177/18800	0.00012916	0.0140635	0.0123084	RNASEK/CD81/AVP/HSPA1B/ITGB1/ANPEP/TRIM6/CTSL/HSPA1A/INSR/CTSB	11
GO:1905039	BP	GO:1905039	carboxylic acid transmembrane transport	10/299	152/18800	0.00016375	0.0173196	0.0151582	LRP2/THBS1/SLC7A8/SLC3A1/ABCD3/SLC6A19/ITGB1/ACSL1/SLC25A10/SLC25A1	10
GO:1903825	BP	GO:1903825	organic acid transmembrane transport	10/299	153/18800	0.00017278	0.0177673	0.01555	LRP2/THBS1/SLC7A8/SLC3A1/ABCD3/SLC6A19/ITGB1/ACSL1/SLC25A10/SLC25A1	10
GO:0006165	BP	GO:0006165	nucleoside diphosphate phosphorylation	8/299	99/18800	0.00018237	0.0182468	0.0159696	AK4/NME2/OGDH/PRKAA2/OGDHL/SLC4A4/ENTPD5/INSR	8
GO:0046939	BP	GO:0046939	nucleotide phosphorylation	8/299	100/18800	0.00019554	0.0190493	0.016672	AK4/NME2/OGDH/PRKAA2/OGDHL/SLC4A4/ENTPD5/INSR	8
GO:0045821	BP	GO:0045821	positive regulation of glycolytic process	4/299	20/18800	0.00024846	0.0232534	0.0203515	PRKAA2/SLC4A4/ENTPD5/INSR	4
GO:0051701	BP	GO:0051701	biological process involved in interaction with host	11/299	191/18800	0.00025125	0.0232534	0.0203515	RNASEK/CD81/AVP/HSPA1B/ITGB1/ANPEP/TRIM6/CTSL/HSPA1A/INSR/CTSB	11
GO:0006576	BP	GO:0006576	cellular biogenic amine metabolic process	8/299	105/18800	0.00027362	0.0247063	0.021623	AGMAT/KL/AFMID/AOC1/ABAT/PAH/MAOB/CHDH	8
GO:0030004	BP	GO:0030004	cellular monovalent inorganic cation homeostasis	8/299	107/18800	0.00031126	0.0274352	0.0240114	RNASEK/ATP1B1/CLIC4/AVP/TMEM106B/SLC4A4/NEDD4L/GRN	8
GO:0030522	BP	GO:0030522	intracellular receptor signaling pathway	13/299	264/18800	0.00032968	0.0283834	0.0248412	ACTN4/RIOK3/HNF4A/DDX17/BIRC2/HSPA1B/NR2F2/ESRRA/NCOA4/HSPA1A/PHB2/TKFC/CALR	13
GO:0097242	BP	GO:0097242	amyloid-beta clearance	5/299	39/18800	0.00036375	0.0301515	0.0263887	LRP2/MME/CLTC/INSR/PICALM	5
GO:0006790	BP	GO:0006790	sulfur compound metabolic process	15/299	339/18800	0.00036946	0.0301515	0.0263887	EEF1G/CIAO2B/CIAO2A/TST/BHMT2/OGDH/GNS/ACOT2/IDH1/ACSL1/SLC25A10/SLC25A1/MAT2B/MAT2A/PIPOX	15
GO:0002753	BP	GO:0002753	cytoplasmic pattern recognition receptor signaling pathway	6/299	60/18800	0.00037465	0.0301515	0.0263887	RIOK3/BIRC2/HSPA1B/HSPA1A/PHB2/TKFC	6
GO:0048813	BP	GO:0048813	dendrite morphogenesis	9/299	139/18800	0.00038914	0.0306513	0.0268261	RAB21/TMEM106B/CDC42/WASL/ITGB1/NEDD4L/ACTR2/CUX1/PICALM	9
GO:0044275	BP	GO:0044275	cellular carbohydrate catabolic process	5/299	40/18800	0.00041036	0.0310173	0.0271464	MIOX/PPP1CB/ABHD10/GK/TKFC	5
GO:0098586	BP	GO:0098586	cellular response to virus	7/299	85/18800	0.00041055	0.0310173	0.0271464	RIOK3/BIRC2/EIF5A/TRIM6/DDX3X/PHB2/TKFC	7
GO:0051918	BP	GO:0051918	negative regulation of fibrinolysis	3/299	10/18800	0.00043993	0.0325726	0.0285076	THBS1/SERPINF2/PLG	3
GO:0044106	BP	GO:0044106	cellular amine metabolic process	8/299	116/18800	0.00053656	0.038912	0.0340559	AGMAT/KL/AFMID/AOC1/ABAT/PAH/MAOB/CHDH	8
GO:0046942	BP	GO:0046942	carboxylic acid transport	13/299	279/18800	0.00055664	0.038912	0.0340559	MIF/LRP2/SLC16A9/SLC7A8/AVP/SLC16A12/SLC3A1/ABCD3/ABAT/ITGB1/PSAP/SLC25A10/SLC25A1	13
GO:0062013	BP	GO:0062013	positive regulation of small molecule metabolic process	9/299	146/18800	0.00055709	0.038912	0.0340559	MTLN/APOC2/PRKAA2/AVP/SLC4A4/ENTPD5/PTH1R/INSR/ARPP19	9
GO:0046031	BP	GO:0046031	ADP metabolic process	7/299	90/18800	0.00058096	0.0392982	0.0343939	AK4/OGDH/PRKAA2/OGDHL/SLC4A4/ENTPD5/INSR	7
GO:0034975	BP	GO:0034975	protein folding in endoplasmic reticulum	3/299	11/18800	0.0005978	0.0392982	0.0343939	CANX/HSP90B1/CALR	3
GO:0071472	BP	GO:0071472	cellular response to salt stress	3/299	11/18800	0.0005978	0.0392982	0.0343939	CAPN3/ZFP36L1/EFHD1	3
GO:0048608	BP	GO:0048608	reproductive structure development	17/299	433/18800	0.00060508	0.0392982	0.0343939	AFP/LRP2/ZFP36L1/CTNNB1/BIRC2/MME/NR2F2/CCND1/PRLR/IDH1/PLG/PSAP/TMED2/NCOA4/INSR/CSDE1/CTSB	17
GO:0006081	BP	GO:0006081	cellular aldehyde metabolic process	6/299	66/18800	0.00062796	0.03946	0.0345355	IDH1/AGXT2/DHRS4L2/ALDH3A2/PNPO/PDXK	6
GO:0072659	BP	GO:0072659	protein localization to plasma membrane	13/299	283/18800	0.00063576	0.03946	0.0345355	ATP1B1/CD81/TSPAN33/EZR/CDH2/CLTC/MAP7/EPB41L3/WDR72/ITGB1/TMED2/PRNP/PICALM	13
GO:0051452	BP	GO:0051452	intracellular pH reduction	5/299	44/18800	0.00064308	0.03946	0.0345355	RNASEK/CLIC4/AVP/TMEM106B/GRN	5
GO:0061458	BP	GO:0061458	reproductive system development	17/299	436/18800	0.00065351	0.03946	0.0345355	AFP/LRP2/ZFP36L1/CTNNB1/BIRC2/MME/NR2F2/CCND1/PRLR/IDH1/PLG/PSAP/TMED2/NCOA4/INSR/CSDE1/CTSB	17
GO:0015980	BP	GO:0015980	energy derivation by oxidation of organic compounds	14/299	321/18800	0.00066338	0.03946	0.0345355	AK4/ATP5F1E/MTLN/ANTKMT/PPP1CB/NDUFA7/SUCLG1/OGDH/ACO1/KL/OGDHL/IDH1/INSR/PPP1R1A	14
GO:0015711	BP	GO:0015711	organic anion transport	15/299	361/18800	0.0007087	0.03946	0.0345355	MIF/LRP2/SLC16A9/SLC22A12/SLC7A8/AVP/SLC16A12/SLC3A1/ABCD3/ABAT/SLC4A4/ITGB1/PSAP/SLC25A10/SLC25A1	15
GO:0009308	BP	GO:0009308	amine metabolic process	8/299	121/18800	0.00070986	0.03946	0.0345355	AGMAT/KL/AFMID/AOC1/ABAT/PAH/MAOB/CHDH	8
GO:0015986	BP	GO:0015986	proton motive force-driven ATP synthesis	4/299	26/18800	0.0007112	0.03946	0.0345355	ATP6V0C/ATP5F1E/ANTKMT/ATP6V1A	4
GO:0032892	BP	GO:0032892	positive regulation of organic acid transport	5/299	45/18800	0.00071416	0.03946	0.0345355	MIF/AVP/ABAT/ITGB1/ACSL1	5
GO:0072583	BP	GO:0072583	clathrin-dependent endocytosis	5/299	45/18800	0.00071416	0.03946	0.0345355	CANX/CLTC/WASL/AP2B1/PICALM	5
GO:0009206	BP	GO:0009206	purine ribonucleoside triphosphate biosynthetic process	6/299	68/18800	0.00073671	0.0401071	0.0351019	AK4/ATP6V0C/NME2/ATP5F1E/ANTKMT/ATP6V1A	6
GO:0009145	BP	GO:0009145	purine nucleoside triphosphate biosynthetic process	6/299	69/18800	0.00079626	0.0427211	0.0373896	AK4/ATP6V0C/NME2/ATP5F1E/ANTKMT/ATP6V1A	6
GO:0009651	BP	GO:0009651	response to salt stress	4/299	27/18800	0.00082452	0.0429913	0.0376261	CAPN3/ZFP36L1/AVP/EFHD1	4
GO:0035459	BP	GO:0035459	vesicle cargo loading	4/299	27/18800	0.00082452	0.0429913	0.0376261	SEC31A/TMED2/MIA2/PICALM	4
GO:0032890	BP	GO:0032890	regulation of organic acid transport	6/299	70/18800	0.00085946	0.0441907	0.0386758	MIF/THBS1/AVP/ABAT/ITGB1/ACSL1	6
GO:0042133	BP	GO:0042133	neurotransmitter metabolic process	4/299	28/18800	0.00095	0.0481769	0.0421645	ABAT/PAH/MAOB/GCHFR	4
GO:0046415	BP	GO:0046415	urate metabolic process	3/299	13/18800	0.00101201	0.049953	0.043719	SLC16A9/SLC22A12/PNP	3
GO:0070424	BP	GO:0070424	regulation of nucleotide-binding oligomerization domain containing signaling pathway	3/299	13/18800	0.00101201	0.049953	0.043719	BIRC2/HSPA1B/HSPA1A	3
GO:0005925	CC	GO:0005925	focal adhesion	25/307	419/19594	1.24e-08	4.41e-06	3.14e-06	ATP6V0C/RPS10/PPP1CB/PCBP2/ACTN4/CD81/EZR/CTNNB1/RAB21/CDH2/MME/HSPA1B/ITGA6/CLTC/CDC42/G3BP1/ITGB1/NCKAP1/CD59/ACTR2/HSPA1A/CNN3/HSP90B1/CALR/YWHAE	25
GO:0030055	CC	GO:0030055	cell-substrate junction	25/307	428/19594	1.89e-08	4.41e-06	3.14e-06	ATP6V0C/RPS10/PPP1CB/PCBP2/ACTN4/CD81/EZR/CTNNB1/RAB21/CDH2/MME/HSPA1B/ITGA6/CLTC/CDC42/G3BP1/ITGB1/NCKAP1/CD59/ACTR2/HSPA1A/CNN3/HSP90B1/CALR/YWHAE	25
GO:0005774	CC	GO:0005774	vacuolar membrane	24/307	449/19594	1.92e-07	2.98e-05	2.13e-05	CUBN/ATP6V0C/RNASEK/GABARAP/PLAAT3/LRP2/SPAG9/FNIP2/BRI3/CLCN5/RNF152/CLTC/TMEM106B/SLC3A1/ATP6V1A/MYO6/CD164/ANPEP/PSAP/AP2B1/ATP6V0B/ATP6V1B2/UBXN6/GRN	24
GO:0045177	CC	GO:0045177	apical part of cell	23/307	424/19594	2.68e-07	3.13e-05	2.23e-05	CUBN/UMOD/LRP2/ATP1B1/CLIC4/EZR/SLC22A12/SLC7A8/CTNNB1/KL/CLCN5/CDH2/PARD6B/LGMN/SLC3A1/SLC6A19/CDC42/ATP6V1A/CTSL/GNAS/PTH1R/ATP6V1B2/CTSB	23
GO:0030662	CC	GO:0030662	coated vesicle membrane	14/307	176/19594	7.59e-07	7.09e-05	5.05e-05	LRP2/HLA-A/AVP/SEC31A/CLTC/SEC22B/AFTPH/MYO6/TGOLN2/CD59/TMED2/AP2B1/CLINT1/EPN1	14
GO:0005765	CC	GO:0005765	lysosomal membrane	21/307	404/19594	1.78e-06	0.00011849	8.44e-05	CUBN/ATP6V0C/PLAAT3/LRP2/SPAG9/FNIP2/BRI3/CLCN5/RNF152/CLTC/TMEM106B/ATP6V1A/MYO6/CD164/ANPEP/PSAP/AP2B1/ATP6V0B/ATP6V1B2/UBXN6/GRN	21
GO:0098852	CC	GO:0098852	lytic vacuole membrane	21/307	404/19594	1.78e-06	0.00011849	8.44e-05	CUBN/ATP6V0C/PLAAT3/LRP2/SPAG9/FNIP2/BRI3/CLCN5/RNF152/CLTC/TMEM106B/ATP6V1A/MYO6/CD164/ANPEP/PSAP/AP2B1/ATP6V0B/ATP6V1B2/UBXN6/GRN	21
GO:0005777	CC	GO:0005777	peroxisome	12/307	141/19594	2.32e-06	0.00012053	8.59e-05	PLAAT3/AMACR/AOC1/ACOT2/ABCD3/IDH1/ACOX1/DHRS4L2/ACSL1/ALDH3A2/PIPOX/PXMP2	12
GO:0042579	CC	GO:0042579	microbody	12/307	141/19594	2.32e-06	0.00012053	8.59e-05	PLAAT3/AMACR/AOC1/ACOT2/ABCD3/IDH1/ACOX1/DHRS4L2/ACSL1/ALDH3A2/PIPOX/PXMP2	12
GO:0030139	CC	GO:0030139	endocytic vesicle	18/307	342/19594	8.3e-06	0.00038749	0.000276	CUBN/ATP6V0C/LRP2/HLA-A/AVP/CLTC/SEC22B/CDC42/MYO6/WASL/TGOLN2/RAB11FIP3/CTSL/AP2B1/ATP6V0B/HSP90B1/CALR/PICALM	18
GO:0030135	CC	GO:0030135	coated vesicle	16/307	290/19594	1.48e-05	0.0005994	0.00042693	LRP2/HLA-A/AVP/SEC31A/CLTC/SEC22B/AFTPH/MYO6/TGOLN2/CD59/SPG21/TMED2/AP2B1/PICALM/CLINT1/EPN1	16
GO:0016324	CC	GO:0016324	apical plasma membrane	18/307	358/19594	1.54e-05	0.0005994	0.00042693	CUBN/UMOD/LRP2/ATP1B1/EZR/SLC22A12/SLC7A8/KL/CDH2/PARD6B/SLC3A1/SLC6A19/ATP6V1A/CTSL/GNAS/PTH1R/ATP6V1B2/CTSB	18
GO:0005759	CC	GO:0005759	mitochondrial matrix	21/307	473/19594	1.99e-05	0.00071506	0.00050932	AK4/MRPS24/ATP5F1E/TST/NDUFA7/SUCLG1/ALDH6A1/OGDH/ABHD10/OGDHL/GLS/ACOT2/LRPPRC/ACADSB/MRPS34/ABAT/MCCC2/AGXT2/ALDH4A1/TXN2/ALDH1B1	21
GO:1904813	CC	GO:1904813	ficolin-1-rich granule lumen	10/307	124/19594	2.6e-05	0.0008679	0.00061818	NME2/MIF/GNS/HSPA1B/IDH1/ACTR2/PNP/HSPA1A/DDX3X/CTSB	10
GO:0030118	CC	GO:0030118	clathrin coat	6/307	39/19594	2.97e-05	0.00092595	0.00065953	CLTC/AFTPH/AP2B1/PICALM/CLINT1/EPN1	6
GO:0010494	CC	GO:0010494	cytoplasmic stress granule	8/307	79/19594	3.3e-05	0.00096203	0.00068523	CELF1/PRKAA2/G3BP1/MCRIP2/G3BP2/STAU1/DDX3X/CSDE1	8
GO:0016471	CC	GO:0016471	vacuolar proton-transporting V-type ATPase complex	5/307	25/19594	3.75e-05	0.00097389	0.00069368	ATP6V0C/RNASEK/ATP6V1A/ATP6V0B/ATP6V1B2	5
GO:0030125	CC	GO:0030125	clathrin vesicle coat	5/307	25/19594	3.75e-05	0.00097389	0.00069368	CLTC/AFTPH/AP2B1/CLINT1/EPN1	5
GO:0034774	CC	GO:0034774	secretory granule lumen	16/307	322/19594	5.27e-05	0.00118006	0.00084052	NME2/MIF/VEGFB/ACTN4/THBS1/GNS/AOC1/SERPINF2/IDH1/SELENOP/PLG/ACTR2/PNP/DDX3X/GRN/PDXK	16
GO:0042470	CC	GO:0042470	melanosome	9/307	109/19594	5.48e-05	0.00118006	0.00084052	CANX/CLTC/SEC22B/ITGB1/ATP6V1B2/HSP90B1/YWHAE/GCHFR/CTSB	9
GO:0048770	CC	GO:0048770	pigment granule	9/307	109/19594	5.48e-05	0.00118006	0.00084052	CANX/CLTC/SEC22B/ITGB1/ATP6V1B2/HSP90B1/YWHAE/GCHFR/CTSB	9
GO:0033176	CC	GO:0033176	proton-transporting V-type ATPase complex	5/307	27/19594	5.56e-05	0.00118006	0.00084052	ATP6V0C/RNASEK/ATP6V1A/ATP6V0B/ATP6V1B2	5
GO:0060205	CC	GO:0060205	cytoplasmic vesicle lumen	16/307	325/19594	5.88e-05	0.00118066	0.00084095	NME2/MIF/VEGFB/ACTN4/THBS1/GNS/AOC1/SERPINF2/IDH1/SELENOP/PLG/ACTR2/PNP/DDX3X/GRN/PDXK	16
GO:0030665	CC	GO:0030665	clathrin-coated vesicle membrane	9/307	111/19594	6.32e-05	0.00118066	0.00084095	LRP2/AVP/CLTC/AFTPH/MYO6/TGOLN2/AP2B1/CLINT1/EPN1	9
GO:0031983	CC	GO:0031983	vesicle lumen	16/307	327/19594	6.32e-05	0.00118066	0.00084095	NME2/MIF/VEGFB/ACTN4/THBS1/GNS/AOC1/SERPINF2/IDH1/SELENOP/PLG/ACTR2/PNP/DDX3X/GRN/PDXK	16
GO:0036019	CC	GO:0036019	endolysosome	5/307	28/19594	6.68e-05	0.00120008	0.00085478	LGMN/CLTC/CTSL/AP2B1/CTSB	5
GO:0005902	CC	GO:0005902	microvillus	8/307	90/19594	8.44e-05	0.0014599	0.00103985	CLIC4/EZR/SLC7A8/CTNNB1/ATP6V1A/IQGAP2/MYO6/ATP6V1B2	8
GO:0031253	CC	GO:0031253	cell projection membrane	16/307	339/19594	9.64e-05	0.00160742	0.00114493	CUBN/UMOD/SEPTIN2/LRP2/EZR/SLC22A12/SLC7A8/CTNNB1/SLC3A1/SLC6A19/EPB41L3/MYO6/ITGB1/NCKAP1/CYS1/INSR	16
GO:0042788	CC	GO:0042788	polysomal ribosome	5/307	31/19594	0.00011115	0.0017359	0.00123643	RPL39/RPS28/RPS21/RPL36A/RPS26	5
GO:0005905	CC	GO:0005905	clathrin-coated pit	7/307	70/19594	0.00011151	0.0017359	0.00123643	CUBN/LRP2/CLTC/MYO6/AP2B1/PICALM/EPN1	7
GO:0005782	CC	GO:0005782	peroxisomal matrix	6/307	50/19594	0.00012537	0.00175025	0.00124666	AMACR/ACOT2/ABCD3/IDH1/ACOX1/PIPOX	6
GO:0016469	CC	GO:0016469	proton-transporting two-sector ATPase complex	6/307	50/19594	0.00012537	0.00175025	0.00124666	ATP6V0C/RNASEK/ATP5F1E/ATP6V1A/ATP6V0B/ATP6V1B2	6
GO:0031907	CC	GO:0031907	microbody lumen	6/307	50/19594	0.00012537	0.00175025	0.00124666	AMACR/ACOT2/ABCD3/IDH1/ACOX1/PIPOX	6
GO:0036464	CC	GO:0036464	cytoplasmic ribonucleoprotein granule	13/307	243/19594	0.00012743	0.00175025	0.00124666	ZFP36L1/CELF1/PRKAA2/PCBP1/UHMK1/CDC42/G3BP1/MCRIP2/G3BP2/STAU1/TOP1/DDX3X/CSDE1	13
GO:0030120	CC	GO:0030120	vesicle coat	6/307	52/19594	0.00015646	0.00208767	0.00148699	SEC31A/CLTC/AFTPH/AP2B1/CLINT1/EPN1	6
GO:0101002	CC	GO:0101002	ficolin-1-rich granule	11/307	185/19594	0.000168	0.00217936	0.0015523	ATP6V0C/NME2/MIF/GNS/HSPA1B/IDH1/ACTR2/PNP/HSPA1A/DDX3X/CTSB	11
GO:0031904	CC	GO:0031904	endosome lumen	5/307	35/19594	0.00020176	0.00254653	0.00181383	LRP2/LGMN/PRLR/CTSL/CTSB	5
GO:0030136	CC	GO:0030136	clathrin-coated vesicle	11/307	192/19594	0.00023214	0.0028529	0.00203205	LRP2/AVP/CLTC/AFTPH/MYO6/TGOLN2/SPG21/AP2B1/PICALM/CLINT1/EPN1	11
GO:0016323	CC	GO:0016323	basolateral plasma membrane	12/307	226/19594	0.00024687	0.00292814	0.00208564	UMOD/ATP1B1/CD81/EZR/SLC7A8/CTNNB1/SLC16A12/CDH2/MAP7/SLC4A4/KCNJ16/PTH1R	12
GO:0030666	CC	GO:0030666	endocytic vesicle membrane	11/307	194/19594	0.00025388	0.00292814	0.00208564	ATP6V0C/LRP2/HLA-A/AVP/CLTC/SEC22B/WASL/TGOLN2/AP2B1/ATP6V0B/CALR	11
GO:0035770	CC	GO:0035770	ribonucleoprotein granule	13/307	261/19594	0.00025707	0.00292814	0.00208564	ZFP36L1/CELF1/PRKAA2/PCBP1/UHMK1/CDC42/G3BP1/MCRIP2/G3BP2/STAU1/TOP1/DDX3X/CSDE1	13
GO:0030117	CC	GO:0030117	membrane coat	7/307	84/19594	0.00034969	0.00379782	0.00270509	SEC31A/CLTC/AFTPH/AP2B1/PICALM/CLINT1/EPN1	7
GO:0048475	CC	GO:0048475	coated membrane	7/307	84/19594	0.00034969	0.00379782	0.00270509	SEC31A/CLTC/AFTPH/AP2B1/PICALM/CLINT1/EPN1	7
GO:0000220	CC	GO:0000220	vacuolar proton-transporting V-type ATPase, V0 domain	3/307	10/19594	0.00042124	0.0044709	0.0031845	ATP6V0C/RNASEK/ATP6V0B	3
GO:0019898	CC	GO:0019898	extrinsic component of membrane	14/307	314/19594	0.00046325	0.00480751	0.00342426	S100A6/DEFB1/CUBN/UMOD/EZR/CTNNB1/CDH2/PLG/NMT1/GNAS/GNG12/PRNP/PICALM/UBXN6	14
GO:0005778	CC	GO:0005778	peroxisomal membrane	6/307	64/19594	0.00049248	0.00489335	0.0034854	PLAAT3/ABCD3/ACOX1/ACSL1/ALDH3A2/PXMP2	6
GO:0031903	CC	GO:0031903	microbody membrane	6/307	64/19594	0.00049248	0.00489335	0.0034854	PLAAT3/ABCD3/ACOX1/ACSL1/ALDH3A2/PXMP2	6
GO:0005844	CC	GO:0005844	polysome	6/307	65/19594	0.00053552	0.00521017	0.00371107	RPL39/RPS28/RPS21/RPL36A/RPS26/CALR	6
GO:0045334	CC	GO:0045334	clathrin-coated endocytic vesicle	7/307	91/19594	0.00056942	0.00542693	0.00386546	LRP2/AVP/CLTC/MYO6/TGOLN2/AP2B1/PICALM	7
GO:0009925	CC	GO:0009925	basal plasma membrane	12/307	251/19594	0.0006343	0.00592437	0.00421977	UMOD/ATP1B1/CD81/EZR/SLC7A8/CTNNB1/SLC16A12/CDH2/MAP7/SLC4A4/KCNJ16/PTH1R	12
GO:0015935	CC	GO:0015935	small ribosomal subunit	6/307	69/19594	0.00073768	0.00675482	0.00481128	MRPS24/RPS28/RPS21/RPS10/RPS26/MRPS34	6
GO:0033179	CC	GO:0033179	proton-transporting V-type ATPase, V0 domain	3/307	12/19594	0.0007545	0.00677603	0.00482639	ATP6V0C/RNASEK/ATP6V0B	3
GO:0031252	CC	GO:0031252	cell leading edge	16/307	416/19594	0.00092852	0.00818147	0.00582744	S100A6/NME2/EZR/CTNNB1/CDH2/EPB41L3/CDC42/IQGAP2/MYO6/WASL/ITGB1/NCKAP1/ACTR2/DDX3X/INSR/ATP6V1B2	16
GO:0005840	CC	GO:0005840	ribosome	11/307	229/19594	0.00101763	0.00880062	0.00626844	MRPS24/RPL39/RPL17/RPS28/RPS21/RPS10/NDUFA7/RPL36A/CANX/RPS26/MRPS34	11
GO:0005903	CC	GO:0005903	brush border	7/307	102/19594	0.00112291	0.00936425	0.00666991	CUBN/LRP2/EZR/SLC22A12/MME/SLC3A1/SLC6A19	7
GO:0022626	CC	GO:0022626	cytosolic ribosome	7/307	102/19594	0.00112291	0.00936425	0.00666991	RPL39/RPL17/RPS28/RPS21/RPS10/RPL36A/RPS26	7
GO:0045178	CC	GO:0045178	basal part of cell	12/307	269/19594	0.00115694	0.00947881	0.0067515	UMOD/ATP1B1/CD81/EZR/SLC7A8/CTNNB1/SLC16A12/CDH2/MAP7/SLC4A4/KCNJ16/PTH1R	12
GO:0030132	CC	GO:0030132	clathrin coat of coated pit	3/307	14/19594	0.00121968	0.00982053	0.0069949	CLTC/AP2B1/PICALM	3
GO:0005791	CC	GO:0005791	rough endoplasmic reticulum	6/307	79/19594	0.00150159	0.0117022	0.00833516	RPS28/RPS21/CANX/RPS26/SRP9/STAU1	6
GO:0030140	CC	GO:0030140	trans-Golgi network transport vesicle	4/307	32/19594	0.00150349	0.0117022	0.00833516	CLTC/AFTPH/TGOLN2/SPG21	4
GO:0098798	CC	GO:0098798	mitochondrial protein-containing complex	12/307	281/19594	0.0016737	0.0126194	0.00898847	MRPS24/ATP5F1E/MICOS10/MICOS13/NDUFA7/SUCLG1/NDUFA13/TOMM5/COX8A/MRPS34/MCCC2/PHB2	12
GO:0031526	CC	GO:0031526	brush border membrane	5/307	55/19594	0.00167538	0.0126194	0.00898847	CUBN/LRP2/SLC22A12/SLC3A1/SLC6A19	5
GO:0030133	CC	GO:0030133	transport vesicle	15/307	402/19594	0.00178848	0.0131722	0.00938218	SEPTIN2/HLA-A/CLCN5/MME/RAB1B/SEC31A/CLTC/SEC22B/AFTPH/ATP6V1A/TGOLN2/CD59/SPG21/TMED2/PICALM	15
GO:0031305	CC	GO:0031305	integral component of mitochondrial inner membrane	5/307	56/19594	0.00181642	0.0131722	0.00938218	MICOS10/MTLN/MICOS13/COX16/PET100	5
GO:0045239	CC	GO:0045239	tricarboxylic acid cycle enzyme complex	3/307	16/19594	0.00183338	0.0131722	0.00938218	SUCLG1/OGDH/OGDHL	3
GO:0031304	CC	GO:0031304	intrinsic component of mitochondrial inner membrane	5/307	57/19594	0.00196596	0.0139107	0.00990818	MICOS10/MTLN/MICOS13/COX16/PET100	5
GO:0005743	CC	GO:0005743	mitochondrial inner membrane	17/307	491/19594	0.00201379	0.0139248	0.00991827	MRPS24/GATM/ATP5F1E/MICOS10/MTLN/MICOS13/COX16/NDUFA7/NDUFA13/COX8A/MRPS34/EFHD1/CHDH/SLC25A10/SLC25A1/PET100/PHB2	17
GO:0044391	CC	GO:0044391	ribosomal subunit	9/307	178/19594	0.0020276	0.0139248	0.00991827	MRPS24/RPL39/RPL17/RPS28/RPS21/RPS10/RPL36A/RPS26/MRPS34	9
GO:0098858	CC	GO:0098858	actin-based cell projection	10/307	217/19594	0.00231091	0.0156405	0.0111403	CLIC4/EZR/SLC7A8/CTNNB1/CDC42/ATP6V1A/IQGAP2/MYO6/ITGB1/ATP6V1B2	10
GO:0012507	CC	GO:0012507	ER to Golgi transport vesicle membrane	5/307	62/19594	0.00285167	0.0190247	0.0135508	HLA-A/SEC31A/SEC22B/CD59/TMED2	5
GO:0033178	CC	GO:0033178	proton-transporting two-sector ATPase complex, catalytic domain	3/307	20/19594	0.00356336	0.0234379	0.0166942	ATP5F1E/ATP6V1A/ATP6V1B2	3
GO:0031968	CC	GO:0031968	organelle outer membrane	10/307	232/19594	0.00372913	0.0241876	0.0172282	TOMM6/MICOS10/MICOS13/TOMM5/LRPPRC/ASS1/MAOB/ACSL1/PHB2/GK	10
GO:0019867	CC	GO:0019867	outer membrane	10/307	234/19594	0.0039614	0.0252119	0.0179578	TOMM6/MICOS10/MICOS13/TOMM5/LRPPRC/ASS1/MAOB/ACSL1/PHB2/GK	10
GO:0031093	CC	GO:0031093	platelet alpha granule lumen	5/307	67/19594	0.00399503	0.0252119	0.0179578	VEGFB/ACTN4/THBS1/SERPINF2/PLG	5
GO:0005742	CC	GO:0005742	mitochondrial outer membrane translocase complex	3/307	21/19594	0.0041095	0.0255885	0.018226	MICOS10/MICOS13/TOMM5	3
GO:0043202	CC	GO:0043202	lysosomal lumen	6/307	97/19594	0.00422677	0.0259724	0.0184994	CUBN/GNS/LGMN/PSAP/CTSL/CTSB	6
GO:0022627	CC	GO:0022627	cytosolic small ribosomal subunit	4/307	43/19594	0.0045097	0.027351	0.0194814	RPS28/RPS21/RPS10/RPS26	4
GO:0005793	CC	GO:0005793	endoplasmic reticulum-Golgi intermediate compartment	7/307	131/19594	0.00462888	0.0274581	0.0195577	TRAPPC5/RAB1B/SEC22B/ANPEP/CD59/TMED2/CALR	7
GO:0030027	CC	GO:0030027	lamellipodium	9/307	202/19594	0.00469606	0.0274581	0.0195577	NME2/CTNNB1/CDH2/IQGAP2/WASL/ITGB1/NCKAP1/ACTR2/DDX3X	9
GO:0098799	CC	GO:0098799	outer mitochondrial membrane protein complex	3/307	22/19594	0.00470375	0.0274581	0.0195577	MICOS10/MICOS13/TOMM5	3
GO:0001772	CC	GO:0001772	immunological synapse	4/307	44/19594	0.00490051	0.0282535	0.0201242	CD81/EZR/VAV3/ARHGDIA	4
GO:0005741	CC	GO:0005741	mitochondrial outer membrane	9/307	205/19594	0.00516433	0.0294115	0.020949	TOMM6/MICOS10/MICOS13/TOMM5/ASS1/MAOB/ACSL1/PHB2/GK	9
GO:0071682	CC	GO:0071682	endocytic vesicle lumen	3/307	23/19594	0.00534727	0.0299681	0.0213455	CTSL/HSP90B1/CALR	3
GO:0030669	CC	GO:0030669	clathrin-coated endocytic vesicle membrane	5/307	72/19594	0.00543365	0.0299681	0.0213455	LRP2/AVP/CLTC/TGOLN2/AP2B1	5
GO:0019897	CC	GO:0019897	extrinsic component of plasma membrane	8/307	170/19594	0.00545458	0.0299681	0.0213455	S100A6/CUBN/CTNNB1/CDH2/PLG/GNAS/GNG12/PICALM	8
GO:0030867	CC	GO:0030867	rough endoplasmic reticulum membrane	3/307	24/19594	0.00604113	0.0327441	0.0233227	RPS28/RPS26/SRP9	3
GO:0016234	CC	GO:0016234	inclusion body	5/307	74/19594	0.00610008	0.0327441	0.0233227	MIOX/HSPA1B/HSPA1A/PRNP/PICALM	5
GO:0005775	CC	GO:0005775	vacuolar lumen	8/307	174/19594	0.00625415	0.0331896	0.0236401	CUBN/GNS/LGMN/ACTR2/PSAP/CTSL/GRN/CTSB	8
GO:0014704	CC	GO:0014704	intercalated disc	4/307	49/19594	0.0071966	0.0369722	0.0263343	ATP1B1/CTNNB1/CDH2/ITGB1	4
GO:0030670	CC	GO:0030670	phagocytic vesicle membrane	5/307	77/19594	0.00720443	0.0369722	0.0263343	ATP6V0C/HLA-A/SEC22B/ATP6V0B/CALR	5
GO:0033116	CC	GO:0033116	endoplasmic reticulum-Golgi intermediate compartment membrane	5/307	77/19594	0.00720443	0.0369722	0.0263343	RAB1B/SEC22B/CD59/TMED2/CALR	5
GO:0031528	CC	GO:0031528	microvillus membrane	3/307	26/19594	0.00758371	0.0380817	0.0271246	EZR/SLC7A8/CTNNB1	3
GO:0033177	CC	GO:0033177	proton-transporting two-sector ATPase complex, proton-transporting domain	3/307	26/19594	0.00758371	0.0380817	0.0271246	ATP6V0C/RNASEK/ATP6V0B	3
GO:0005916	CC	GO:0005916	fascia adherens	2/307	10/19594	0.0101336	0.049125	0.0349904	CTNNB1/CDH2	2
GO:0097197	CC	GO:0097197	tetraspanin-enriched microdomain	2/307	10/19594	0.0101336	0.049125	0.0349904	CD81/TSPAN33	2
GO:0071556	CC	GO:0071556	integral component of lumenal side of endoplasmic reticulum membrane	3/307	29/19594	0.0102969	0.049125	0.0349904	HLA-A/CANX/CALR	3
GO:0098553	CC	GO:0098553	lumenal side of endoplasmic reticulum membrane	3/307	29/19594	0.0102969	0.049125	0.0349904	HLA-A/CANX/CALR	3
GO:0005798	CC	GO:0005798	Golgi-associated vesicle	5/307	84/19594	0.0103089	0.049125	0.0349904	CLTC/AFTPH/TGOLN2/SPG21/TMED2	5
GO:0045296	MF	GO:0045296	cadherin binding	18/304	333/18410	1.16e-05	0.00664244	0.0057941	EEF1G/SEPTIN2/NDRG1/EZR/CTNNB1/PCBP1/CDH2/RPS26/ITGA6/IDH1/ITGB1/HSPA1A/CNN3/DDX3X/BZW1/YWHAE/PICALM/CLINT1	18
GO:0031994	MF	GO:0031994	insulin-like growth factor I binding	4/304	13/18410	4.63e-05	0.0116064	0.0101241	LRP2/ITGA6/IGFBP4/INSR	4
GO:0047485	MF	GO:0047485	protein N-terminus binding	9/304	105/18410	6.09e-05	0.0116064	0.0101241	RPS21/ACTN4/BIRC2/EIF5A/TBL1XR1/HSPA1B/ACOX1/HSPA1A/PHB2	9
GO:0016903	MF	GO:0016903	oxidoreductase activity, acting on the aldehyde or oxo group of donors	6/304	46/18410	0.00010369	0.0148277	0.012934	ALDH6A1/OGDH/OGDHL/ALDH3A2/ALDH4A1/ALDH1B1	6
GO:0051087	MF	GO:0051087	chaperone binding	8/304	106/18410	0.0003748	0.0363626	0.0317185	LRP2/OGDH/FNIP2/BIRC2/PLG/CALR/PRNP/GRN	8
GO:0016620	MF	GO:0016620	oxidoreductase activity, acting on the aldehyde or oxo group of donors, NAD or NADP as acceptor	5/304	38/18410	0.00038143	0.0363626	0.0317185	ALDH6A1/OGDH/ALDH3A2/ALDH4A1/ALDH1B1	5

## Sheet: LOH
	ONTOLOGY	ID	Description	GeneRatio	BgRatio	pvalue	p.adjust	qvalue	geneID	Count
GO:0034976	BP	GO:0034976	response to endoplasmic reticulum stress	49/1057	257/18800	3.61e-14	1.91e-10	1.5e-10	CANX/HSP90B1/TMBIM6/MAN1A1/CALR/TMED2/CREB3L2/THBS1/ITPR1/TMCO1/AMFR/STT3B/ATP2A2/BCAP31/SEL1L/GRINA/TMEM33/JKAMP/HSPA5/DNAJC10/ERMP1/TMX1/SERINC3/CCDC47/TMEM259/PDIA4/UFL1/ERLIN2/JUN/SELENOS/HYOU1/PDIA3/DNAJC3/DNAJB9/P4HB/OS9/HERPUD1/PPP2CB/DNAJB14/EIF4G1/MBTPS1/OPA1/ERLEC1/HM13/DDX3X/UBXN4/MANF/DDRGK1/HSPA1A	49
GO:0043484	BP	GO:0043484	regulation of RNA splicing	35/1057	154/18800	8.53e-13	2.26e-09	1.77e-09	HNRNPH1/DDX17/TMBIM6/SRSF6/CELF1/CLK1/TIA1/RBM25/WTAP/TRA2A/SF1/AHNAK/RBM12B/CLK4/POLR2A/CCNL1/SLC38A2/FMR1/HNRNPU/SETX/TRA2B/RBM5/DYRK1A/SNRNP70/CDK12/PTBP2/MBNL1/CCNL2/YTHDC1/FUS/QKI/MBNL2/PTBP3/REST/HSPA1A	35
GO:0016032	BP	GO:0016032	viral process	60/1057	418/18800	2.01e-11	3.56e-08	2.79e-08	CANX/CD81/BSG/RNASEK/CD46/INSR/ITGB1/HACD3/PPIB/HSPA1B/PROX1/PCBP2/ZFP36/LAMP1/IGF2R/MGAT4A/MAN2A1/NUCKS1/ITGAV/PKN2/GAS6/HPN/PCBP1/ITGA2/CXADR/CTSL/ITGB6/EIF3A/JUN/TASOR/FMR1/IST1/BST2/SCARB2/SPCS3/ITGB5/P4HB/DDB1/NFIA/CTBP1/CTSB/ARL8B/SLC1A5/TOP2B/RSF1/SP1/SLC3A2/SMARCA4/ADAR/PDCD6IP/LARP1/ILF3/REST/CDC42/DDX3X/STAT1/WWP1/TARDBP/CSNK1A1/HSPA1A	60
GO:0045216	BP	GO:0045216	cell-cell junction organization	37/1057	205/18800	2.56e-10	3.4e-07	2.66e-07	CD9/CLDN16/CTNNB1/OCLN/VEGFA/DSG2/PKHD1/CLDN10/UGT8/CDH1/CTNND1/PKP4/PKN2/DSP/CXADR/PATJ/ADAM10/ANK2/FLNA/JUP/VCL/CLDN19/PRKCI/HIPK1/AFDN/CLDN4/PERP/TJP1/EPB41L3/CLDN3/CLDN7/PDCD6IP/MARVELD2/KIFC3/RDX/CDC42/WDR1	37
GO:0034329	BP	GO:0034329	cell junction assembly	57/1057	420/18800	5.79e-10	6.14e-07	4.81e-07	APP/SFRP1/CD9/CLDN16/ERBB4/NPTN/CTNNB1/SDC4/PLXNB1/OCLN/THBS1/VEGFA/NTRK2/CLDN10/OBSL1/UGT8/PLXNB2/PTPRA/CDH1/CTNND1/DST/AGRN/ITGA6/CLSTN1/SHANK2/PKP4/PKN2/SLK/ITGA2/PATJ/MACF1/VMP1/MYO9A/ANK2/LIMCH1/JUP/VCL/CLDN19/RYK/HIPK1/PHLDB2/AFDN/CLDN4/ADNP/TJP1/MEF2C/EPB41L3/EIF4G1/CLDN3/CLDN7/ARHGAP6/SLC25A46/PDCD6IP/MARVELD2/EPB41L5/CDC42/WDR1	57
GO:0072659	BP	GO:0072659	protein localization to plasma membrane	44/1057	283/18800	7.98e-10	7.05e-07	5.53e-07	ATP1B1/TMEM59/CD81/BSG/TMED2/ITGB1/ACSL3/SPTBN1/ATP2C1/CLTC/CDH1/LRP6/ATP6AP1/HECTD1/PREPL/ANK3/GAS6/LAMA5/MACF1/C2CD5/ANK2/GOLPH3/FLNA/JUP/ZDHHC2/PGRMC1/GOLGA4/PRKCI/TSPAN14/AFDN/ARL6IP5/KIF5B/EZR/EPB41L3/ATP1B3/FAM126B/MAP7/GGA2/RDX/PDPK1/RER1/EFR3A/RHOQ/WDR72	44
GO:0008380	BP	GO:0008380	RNA splicing	58/1057	438/18800	1.05e-09	7.99e-07	6.26e-07	HNRNPH1/DDX17/TMBIM6/SRSF6/PPARGC1A/CELF1/CLK1/RBM6/TIA1/IVNS1ABP/RBM25/RNPC3/SFPQ/WTAP/TRA2A/LUC7L3/SF1/AHNAK/RBM12B/CLK4/POLR2A/CCNL1/SLC38A2/FMR1/HNRNPU/SETX/TRA2B/RBM5/SCAF11/DHX15/SF3B1/DYRK1A/SNRNP70/SUGP2/THOC2/SREK1/PRPF4B/CDK12/SRSF11/PTBP2/ZC3H13/MBNL1/ZNF638/CCNL2/SRRM2/PRPF8/YTHDC1/FUS/QKI/PPP2R1A/MBNL2/PTBP3/SYNCRIP/REST/PNN/TARDBP/LUC7L2/HSPA1A	58
GO:1990778	BP	GO:1990778	protein localization to cell periphery	48/1057	337/18800	2.74e-09	1.82e-06	1.42e-06	ATP1B1/TMEM59/CD81/BSG/TMED2/ITGB1/ACSL3/MAL/SPTBN1/ATP2C1/CLTC/CDH1/LRP6/ATP6AP1/HECTD1/PREPL/ANK3/CLSTN1/GAS6/LAMA5/MACF1/ADAM10/C2CD5/ANK2/GOLPH3/FLNA/JUP/ZDHHC2/PGRMC1/GOLGA4/PRKCI/TSPAN14/AFDN/TRIP11/ARL6IP5/KIF5B/EZR/EPB41L3/ATP1B3/FAM126B/MAP7/GGA2/RDX/PDPK1/RER1/EFR3A/RHOQ/WDR72	48
GO:0007030	BP	GO:0007030	Golgi organization	30/1057	160/18800	4.99e-09	2.94e-06	2.3e-06	LMAN1/TMED2/AKAP9/TMED7/OBSL1/TMED10/GOLGA8B/GOLGA8A/GOLGB1/TMED4/VMP1/GOLPH3/ATL2/SEC22B/HUWE1/STX16/YIPF4/SYNE1/MAPK1/TRIP11/SURF4/PRKD1/GCC2/TMED9/KIFC3/ARFGEF1/YIPF5/CDC42/YWHAZ/CSNK1A1	30
GO:0034975	BP	GO:0034975	protein folding in endoplasmic reticulum	8/1057	11/18800	1.38e-08	7.32e-06	5.73e-06	CANX/HSP90B1/CALR/HSPA5/DNAJC10/PDIA3/DNAJC3/P4HB	8
GO:0048193	BP	GO:0048193	Golgi vesicle transport	42/1057	294/18800	2.46e-08	1.19e-05	9.31e-06	LMAN1/TMED2/ACSL3/SPTBN1/CREB3L2/TMED7/ATP2C1/SORL1/TMED10/LAMP1/PREPL/BCAP31/ANK3/VPS13C/TMED4/VPS13A/SORT1/SCAMP1/MIA2/AP1G1/MACF1/MON2/SAR1A/GOLPH3/HYOU1/ARFGEF2/SEC22B/GOLGA4/PRKCI/COPA/YIPF4/TRIP11/PRKD1/SAR1B/KDELR2/GCC2/TMED9/SEC31A/YIPF5/GGA2/RER1/COPG1	42
GO:0019058	BP	GO:0019058	viral life cycle	44/1057	317/18800	2.75e-08	1.21e-05	9.51e-06	CD81/BSG/RNASEK/CD46/INSR/ITGB1/HACD3/PPIB/HSPA1B/PROX1/PCBP2/LAMP1/NUCKS1/ITGAV/PKN2/GAS6/PCBP1/ITGA2/CXADR/CTSL/ITGB6/TASOR/FMR1/IST1/BST2/SCARB2/ITGB5/P4HB/DDB1/NFIA/CTBP1/CTSB/ARL8B/SLC1A5/TOP2B/SLC3A2/ADAR/PDCD6IP/LARP1/ILF3/CDC42/DDX3X/WWP1/HSPA1A	44
GO:1903829	BP	GO:1903829	positive regulation of protein localization	55/1057	446/18800	3.55e-08	1.45e-05	1.13e-05	SLC5A3/EGF/CD81/ERBB4/WLS/NPTN/RTN4/ITGB1/ACSL3/SPTBN1/ACSL4/CASR/ATP2C1/SORL1/TMED10/ERBB2/PRKAA2/CDH1/TMEM30A/BCAP31/ANK3/GAS6/NPEPPS/PCM1/C2CD5/SAR1A/GOLPH3/FLNA/JUP/HUWE1/ZDHHC2/PGRMC1/PRKCI/MYH10/YAP1/MESD/KIF5B/TCF7L2/PRKD1/EZR/SAR1B/HIF1A/B3GAT3/ABHD17C/PRKAA1/SOX4/PPM1A/LEPROT/RDX/CDC42/PDPK1/RER1/AP2B1/TARDBP/DDRGK1	55
GO:0030433	BP	GO:0030433	ubiquitin-dependent ERAD pathway	20/1057	86/18800	4.39e-08	1.57e-05	1.23e-05	CANX/HSP90B1/MAN1A1/CALR/AMFR/STT3B/BCAP31/SEL1L/JKAMP/HSPA5/DNAJC10/CCDC47/ERLIN2/SELENOS/DNAJB9/OS9/HERPUD1/DNAJB14/ERLEC1/UBXN4	20
GO:0031647	BP	GO:0031647	regulation of protein stability	42/1057	300/18800	4.43e-08	1.57e-05	1.23e-05	ATP1B1/CD81/CALR/RTN4/PPIB/MDM4/PPARGC1A/HSPA1B/CMTM6/LAMP1/SREBF1/IFI30/CTNND1/SEL1L/LAMP2/NEDD4L/DPM3/ATP1B2/GNAQ/ASPH/PRKDC/HIP1/ANK2/FLNA/HIP1R/ZNF207/MFSD1/GRN/MAPK1/ATF7IP/CTSA/USP9X/PRKD1/USP33/ATP1B3/SOX4/STXBP4/RAB21/TARDBP/CRTAP/DDRGK1/HSPA1A	42
GO:0006986	BP	GO:0006986	response to unfolded protein	26/1057	139/18800	5.48e-08	1.82e-05	1.42e-05	TMBIM6/TMED2/CREB3L2/THBS1/HSPA1B/CREBRF/AMFR/STT3B/TRAM1/TMEM33/JKAMP/HSPA5/DNAJC10/ERMP1/UFL1/SELENOS/DNAJC3/DNAJB9/OS9/HERPUD1/MBTPS1/ERLEC1/UBXN4/MANF/DDRGK1/HSPA1A	26
GO:0072073	BP	GO:0072073	kidney epithelium development	26/1057	140/18800	6.38e-08	1.99e-05	1.56e-05	SFRP1/CTNNB1/SDC4/LGR4/VEGFA/WNK4/GPC3/PBX1/JAG1/IQGAP1/PKD2/POU3F3/EPCAM/LAMA5/SIM1/PAX2/SALL1/SDC1/YAP1/SMAD5/TACSTD2/MEF2C/MAGED1/TFAP2B/SMAD2/STAT1	26
GO:0030004	BP	GO:0030004	cellular monovalent inorganic cation homeostasis	22/1057	107/18800	1.01e-07	2.89e-05	2.27e-05	ATP1A1/ATP1B1/SCNN1A/RNASEK/TMEM106B/CLCN3/ATP6AP1/ATP6AP2/CLN5/NEDD4L/ATP1B2/TMEM9/TMEM165/SLC4A2/ATP6V0A4/SLC4A4/GRN/MAPK1/PPT1/ATP1B3/TFAP2B/UBE3A	22
GO:0032386	BP	GO:0032386	regulation of intracellular transport	44/1057	332/18800	1.08e-07	2.89e-05	2.27e-05	CD81/LMAN1/SORL1/ERBB2/LAMP1/SREBF1/CDH1/TMEM30A/BCAP31/ANK3/XPO1/GAS6/NPEPPS/PCM1/C2CD5/SAR1A/FLNA/JUP/HUWE1/ZDHHC2/REEP5/MAPK1/NUP58/SETD2/NF1/DYNC1H1/TCF7L2/PRKD1/EZR/OS9/SAR1B/UHMK1/B3GAT3/GCC2/PRKAA1/RAB21/YIPF5/PPM1A/ERLEC1/LEPROT/RDX/WWC1/CDC42/TARDBP	44
GO:0031331	BP	GO:0031331	positive regulation of cellular catabolic process	54/1057	449/18800	1.09e-07	2.89e-05	2.27e-05	EGF/TMEM59/APP/CD81/INSR/ZFP36L1/CELF1/HSPA1B/PRKAA2/ZFP36/MTDH/HECTD1/BCAP31/PTTG1IP/TNRC6A/SPTLC1/KCNQ1OT1/TNRC6B/CTSC/TMEM259/TOB1/UFL1/PLIN5/YTHDF3/FMR1/HNRNPU/SLC4A4/RAB3GAP1/BTG2/PUM1/MTLN/DAPK1/ZYG11B/PRKD1/ANKIB1/EZR/HERPUD1/HIF1A/ZBTB20/FBXL5/LARP1/PRKAA1/TUT4/WAC/CNOT6L/RDX/SYNCRIP/PNPLA2/PIK3C2A/TARDBP/ZFP36L2/CSNK1A1/DDRGK1/HSPA1A	54
GO:0033157	BP	GO:0033157	regulation of intracellular protein transport	34/1057	224/18800	1.21e-07	3.05e-05	2.39e-05	CD81/LMAN1/SORL1/ERBB2/SREBF1/CDH1/TMEM30A/BCAP31/ANK3/XPO1/GAS6/NPEPPS/PCM1/C2CD5/SAR1A/FLNA/JUP/HUWE1/ZDHHC2/NUP58/NF1/TCF7L2/PRKD1/OS9/SAR1B/UHMK1/B3GAT3/GCC2/PRKAA1/PPM1A/ERLEC1/LEPROT/CDC42/TARDBP	34
GO:0072001	BP	GO:0072001	renal system development	42/1057	312/18800	1.35e-07	3.23e-05	2.53e-05	SFRP1/ERBB4/CTNNB1/SDC4/LGR4/VEGFA/WNK4/PKHD1/GPC3/PBX1/COL4A3/JAG1/PROX1/EGR1/IQGAP1/PKD2/ZMPSTE24/COL4A4/BICC1/POU3F3/EPCAM/LAMA5/SIM1/PAX2/NFIA/SALL1/SDC1/YAP1/NIPBL/NF1/COL4A1/SMAD5/TACSTD2/MEF2C/MAGED1/TFAP2B/EMX2/SOX4/SMAD2/STAT1/PDGFA/AP2B1	42
GO:0036503	BP	GO:0036503	ERAD pathway	22/1057	109/18800	1.42e-07	3.23e-05	2.53e-05	CANX/HSP90B1/MAN1A1/CALR/AMFR/STT3B/BCAP31/SEL1L/JKAMP/HSPA5/DNAJC10/CCDC47/TMEM259/ERLIN2/SELENOS/DNAJB9/OS9/HERPUD1/DNAJB14/ERLEC1/HM13/UBXN4	22
GO:0042060	BP	GO:0042060	wound healing	52/1057	429/18800	1.46e-07	3.23e-05	2.53e-05	CD9/KNG1/PLAU/SDC4/LMAN1/CD59/ITGB1/OCLN/THBS1/VEGFA/SRSF6/ERBB2/MYLK/PRCP/IL6ST/DST/FZD6/SERPING1/TSPAN8/GAS6/ITGA2/GNAQ/DSP/MACF1/DDR1/ITGB6/FLNA/VCL/CLDN19/PHLDB2/SDC1/AK3/YAP1/CLDN4/JMJD1C/NF1/B4GALT1/ARL8B/ANO6/CD151/ARHGAP35/PAPSS2/HIF1A/CLDN3/MYH9/ARFGEF1/TFPI/SMAD2/AP3B1/PDGFA/CASK/VKORC1	52
GO:0022604	BP	GO:0022604	regulation of cell morphogenesis	41/1057	305/18800	1.98e-07	3.95e-05	3.1e-05	CALR/PLXNB1/VEGFA/FAM171A1/ACTN4/OBSL1/CDC42SE1/PLXNB2/ZMPSTE24/NEDD4L/HPN/MKLN1/MACF1/PRKDC/DIAPH1/MYO9A/FLNA/RHOBTB3/PHIP/MYH10/P4HB/CARMIL1/LARP4/CLDN4/TACSTD2/DOCK1/EZR/ARHGAP35/EPB41L3/CAPRIN1/BRWD1/CLDN3/MYH9/NEDD9/RAB21/RDX/CDC42/SPAG9/WDR1/RHOB/RHOQ	41
GO:1903311	BP	GO:1903311	regulation of mRNA metabolic process	40/1057	294/18800	2.01e-07	3.95e-05	3.1e-05	DDX17/ZFP36L1/SRSF6/CELF1/ZFP36/TIA1/RBM25/WTAP/TNRC6A/TRA2A/TNRC6B/SF1/TOB1/MYEF2/YTHDF3/FMR1/HNRNPU/PUM2/NUDT21/TRA2B/RBM5/BTG2/PUM1/DYRK1A/SNRNP70/MBNL1/YTHDC1/AHCYL1/FUS/QKI/ELAVL1/MBNL2/LARP1/TUT4/CNOT6L/SYNCRIP/REST/PAPOLA/TARDBP/ZFP36L2	40
GO:0006605	BP	GO:0006605	protein targeting	42/1057	317/18800	2.11e-07	3.95e-05	3.1e-05	MAN1A1/LMAN1/SORL1/SSR1/ERBB2/SREBF1/SPCS2/BCAP31/ANK3/TRAM1/ARL6IP1/VPS13C/SIL1/HSPA5/LAMP2/VPS13A/NPEPPS/SORT1/ERBIN/C2CD5/HUWE1/ZDHHC14/ZDHHC2/SEC63/ZDHHC21/PRKCI/SCARB2/YWHAG/SPCS3/M6PR/SYNGR1/ZFYVE16/OS9/HERPUD1/GCC2/SEC62/PRKAA1/STXBP4/LEPROT/RAB3IP/AP3B1/YWHAZ	42
GO:0051223	BP	GO:0051223	regulation of protein transport	57/1057	495/18800	2.14e-07	3.95e-05	3.1e-05	SFRP1/CD81/WLS/LMAN1/ACSL3/ACSL4/CASR/ATP2C1/SORL1/TMED10/ERBB2/SREBF1/CDH1/TMEM30A/BCAP31/ANK3/XPO1/GAS6/NPEPPS/PCM1/HMGCR/NDFIP1/C2CD5/SAR1A/GOLPH3/FLNA/JUP/HUWE1/ZDHHC2/PAM/MYH10/NUP58/NF1/PFKL/TCF7L2/CYP51A1/PRKD1/EZR/OS9/SAR1B/UHMK1/HIF1A/NDFIP2/TFAP2B/B3GAT3/GCC2/LLGL2/PRKAA1/SOX4/STXBP4/PPM1A/ERLEC1/LEPROT/REST/CDC42/TARDBP/RAB11FIP3	57
GO:0001655	BP	GO:0001655	urogenital system development	45/1057	352/18800	2.22e-07	3.95e-05	3.1e-05	SFRP1/ERBB4/PSAP/CTNNB1/SDC4/LGR4/VEGFA/WNK4/PKHD1/GPC3/PBX1/COL4A3/JAG1/PROX1/EGR1/IQGAP1/PKD2/ZMPSTE24/COL4A4/BICC1/POU3F3/PRLR/EPCAM/LAMA5/SIM1/PAX2/NFIA/SALL1/SDC1/YAP1/NIPBL/NF1/COL4A1/SMAD5/TACSTD2/MEF2C/MAGED1/TFAP2B/EMX2/UBE3A/SOX4/SMAD2/STAT1/PDGFA/AP2B1	45
GO:0031589	BP	GO:0031589	cell-substrate adhesion	46/1057	364/18800	2.29e-07	3.95e-05	3.1e-05	SFRP1/CALR/PLAU/CTNNB1/SDC4/ITGB1/THBS1/VEGFA/PKHD1/ACTN4/JAG1/PTPRA/ITGA6/ITGAV/GAS6/SLK/NTN4/ATP1B2/ITGA2/MKLN1/LAMA5/LAMB1/UTRN/MACF1/DDR1/ITGB6/TRPM7/LIMCH1/FLNA/JUP/CD63/VCL/ITGB5/P4HB/CARMIL1/PHLDB2/NF1/TACSTD2/DOCK1/RIN2/HSD17B12/ARHGAP6/NEDD9/EPB41L5/CDC42/CASK	46
GO:0032527	BP	GO:0032527	protein exit from endoplasmic reticulum	14/1057	48/18800	2.31e-07	3.95e-05	3.1e-05	HSP90B1/CD81/SORL1/TMEM30A/BCAP31/SEL1L/SAR1A/SELENOS/OS9/SAR1B/HERPUD1/GCC2/ERLEC1/HM13	14
GO:0035966	BP	GO:0035966	response to topologically incorrect protein	27/1057	160/18800	2.77e-07	4.59e-05	3.59e-05	TMBIM6/TMED2/CREB3L2/THBS1/HSPA1B/CREBRF/AMFR/STT3B/TRAM1/TMEM33/JKAMP/HSPA5/DNAJC10/ERMP1/UFL1/SELENOS/DNAJC3/DNAJB9/OS9/HERPUD1/DNAJB14/MBTPS1/ERLEC1/UBXN4/MANF/DDRGK1/HSPA1A	27
GO:0048863	BP	GO:0048863	stem cell differentiation	32/1057	211/18800	2.88e-07	4.62e-05	3.62e-05	SFRP1/ERBB4/CTNNB1/N4BP2L2/SEMA6D/JAG1/LRP6/FOLR1/EPCAM/LAMA5/PRKDC/UFL1/MSI2/SOX6/HNRNPU/NUDT21/LTBP3/PAX2/KITLG/PUM1/MAPK1/YAP1/SETD2/CDK12/TACSTD2/MEF2C/HIF1A/STAT3/OCIAD1/REST/CDC42/ZFP36L2	32
GO:0050821	BP	GO:0050821	protein stabilization	30/1057	191/18800	3.11e-07	4.85e-05	3.8e-05	ATP1B1/CALR/RTN4/PPIB/MDM4/PPARGC1A/HSPA1B/LAMP1/IFI30/CTNND1/SEL1L/LAMP2/ATP1B2/GNAQ/HIP1/ANK2/FLNA/HIP1R/ZNF207/MFSD1/GRN/ATF7IP/USP9X/USP33/ATP1B3/SOX4/STXBP4/RAB21/CRTAP/HSPA1A	30
GO:0016055	BP	GO:0016055	Wnt signaling pathway	53/1057	452/18800	3.22e-07	4.89e-05	3.83e-05	EGF/APP/SFRP1/ATP6V0C/WLS/CTNNB1/LGR4/IGFBP2/GPC3/EGR1/AMFR/PRKAA2/LRP6/PKD2/CTNND1/BICC1/ATP6AP2/FZD6/FOLR1/WNK1/GNAQ/TBL1XR1/USP34/TMEM9/MACF1/RNF43/DAAM1/PBXIP1/AMOTL2/JUP/SOSTDC1/FGF9/RYK/TNKS2/G3BP1/DDB1/SALL1/SDC1/SPIN1/YAP1/MESD/TLE5/TCF7L2/XIAP/JADE1/SMARCA4/PPP2R1A/PRKAA1/SOX4/PPM1A/CDC42/DDX3X/CSNK1A1	53
GO:0198738	BP	GO:0198738	cell-cell signaling by wnt	53/1057	454/18800	3.71e-07	5.25e-05	4.11e-05	EGF/APP/SFRP1/ATP6V0C/WLS/CTNNB1/LGR4/IGFBP2/GPC3/EGR1/AMFR/PRKAA2/LRP6/PKD2/CTNND1/BICC1/ATP6AP2/FZD6/FOLR1/WNK1/GNAQ/TBL1XR1/USP34/TMEM9/MACF1/RNF43/DAAM1/PBXIP1/AMOTL2/JUP/SOSTDC1/FGF9/RYK/TNKS2/G3BP1/DDB1/SALL1/SDC1/SPIN1/YAP1/MESD/TLE5/TCF7L2/XIAP/JADE1/SMARCA4/PPP2R1A/PRKAA1/SOX4/PPM1A/CDC42/DDX3X/CSNK1A1	53
GO:0050678	BP	GO:0050678	regulation of epithelial cell proliferation	47/1057	382/18800	3.75e-07	5.25e-05	4.11e-05	NEAT1/EGF/SFRP1/CXCL12/CTNNB1/RTN4/ZFP36L1/THBS1/VEGFA/SRSF6/PKHD1/GPC3/COL4A3/PROX1/ERBB2/ZFP36/NR2F2/SGPP2/HPN/LAMB1/PRKDC/JUN/RAP1GAP/EMC10/PAX2/FGF9/GRN/YAP1/NF1/B4GALT1/TACSTD2/TCF7L2/KLF9/PRKD1/MEF2C/SP1/HIF1A/MAGED1/MYDGF/HOXA5/STAT3/STXBP4/CDC42/PDPK1/STAT1/CASK/ATF2	47
GO:0002064	BP	GO:0002064	epithelial cell development	31/1057	203/18800	3.76e-07	5.25e-05	4.11e-05	COL18A1/SPINT2/VEGFA/PKHD1/JAG1/PROX1/ATRX/IQGAP1/IL6ST/RAP2C/PLCB1/FLNB/FAT1/VCL/ZDHHC21/SDC1/AFDN/YAP1/B4GALT1/TFCP2L1/EZR/TJP1/HIF1A/CLDN3/VEZF1/HOXA5/ABI2/MARVELD2/EPB41L5/RDX/PDPK1	31
GO:0007623	BP	GO:0007623	circadian rhythm	31/1057	205/18800	4.69e-07	6.38e-05	4.99e-05	PPP1CB/LGR4/NTRK2/PPARGC1A/PROX1/EGR1/PRKAA2/SREBF1/SFPQ/BHLHE40/KMT2A/OGT/GNAQ/PRKDC/HUWE1/HNRNPU/KDM5A/SETX/DDB1/DYRK1A/CLDN4/KLF9/USP9X/NRIP1/MAGED1/NCOR1/UBE3A/GFPT1/JUND/PRKAA1/TARDBP	31
GO:0060147	BP	GO:0060147	regulation of post-transcriptional gene silencing	13/1057	44/18800	5.29e-07	6.84e-05	5.36e-05	NEAT1/ZFP36/ZMPSTE24/KCNQ1OT1/FMR1/PUM2/PUM1/EIF4G1/ADAR/NCOR1/ELAVL1/STAT3/TIAL1	13
GO:1900368	BP	GO:1900368	regulation of post-transcriptional gene silencing by RNA	13/1057	44/18800	5.29e-07	6.84e-05	5.36e-05	NEAT1/ZFP36/ZMPSTE24/KCNQ1OT1/FMR1/PUM2/PUM1/EIF4G1/ADAR/NCOR1/ELAVL1/STAT3/TIAL1	13
GO:0043161	BP	GO:0043161	proteasome-mediated ubiquitin-dependent protein catabolic process	49/1057	414/18800	6.81e-07	8.6e-05	6.73e-05	CANX/HSP90B1/MAN1A1/CALR/CTNNB1/HSPA1B/AMFR/PCBP2/NHLRC3/HECTD1/STT3B/BCAP31/SEL1L/XPO1/JKAMP/HSPA5/OGT/DNAJC10/NEDD4L/CCDC47/TBL1XR1/UFL1/WDR26/ERLIN2/SELENOS/TRIM2/HUWE1/DNAJB9/DDB1/LTN1/ZYG11B/CUL4A/TRIP12/ANKIB1/OS9/HERPUD1/PPP2CB/DNAJB14/BIRC2/FBXL5/SPSB3/CUL5/WAC/ERLEC1/UBXN4/WWP1/CSNK1A1/DDRGK1/HSPA1A	49
GO:0060966	BP	GO:0060966	regulation of gene silencing by RNA	13/1057	46/18800	9.33e-07	0.00011511	9.02e-05	NEAT1/ZFP36/ZMPSTE24/KCNQ1OT1/FMR1/PUM2/PUM1/EIF4G1/ADAR/NCOR1/ELAVL1/STAT3/TIAL1	13
GO:0061326	BP	GO:0061326	renal tubule development	19/1057	94/18800	9.75e-07	0.00011588	9.08e-05	CTNNB1/LGR4/VEGFA/WNK4/GPC3/PBX1/JAG1/PKD2/POU3F3/LAMA5/PAX2/SALL1/YAP1/COL4A1/TACSTD2/MEF2C/MAGED1/TFAP2B/STAT1	19
GO:0070972	BP	GO:0070972	protein localization to endoplasmic reticulum	17/1057	77/18800	9.83e-07	0.00011588	9.08e-05	MAN1A1/RTN4/SPCS2/BCAP31/TRAM1/HSPA5/ANK2/GPAA1/SEC63/SPCS3/RAB3GAP1/OS9/HERPUD1/KDELR2/SEC62/RER1/DDRGK1	17
GO:0030111	BP	GO:0030111	regulation of Wnt signaling pathway	42/1057	336/18800	1.02e-06	0.00011705	9.17e-05	EGF/APP/SFRP1/ATP6V0C/WLS/CTNNB1/LGR4/IGFBP2/GPC3/EGR1/AMFR/CTNND1/BICC1/ATP6AP2/FZD6/FOLR1/WNK1/GNAQ/TBL1XR1/USP34/TMEM9/MACF1/RNF43/PBXIP1/JUP/SOSTDC1/FGF9/TNKS2/G3BP1/SALL1/SPIN1/YAP1/TLE5/TCF7L2/XIAP/JADE1/SMARCA4/PPP2R1A/SOX4/PPM1A/DDX3X/CSNK1A1	42
GO:0010765	BP	GO:0010765	positive regulation of sodium ion transport	11/1057	33/18800	1.04e-06	0.00011705	9.17e-05	ATP1B1/WNK4/ACTN4/ANK3/PRSS8/ATP1B2/WNK1/FXYD2/MLLT6/ATP1B3/AHCYL1	11
GO:0001822	BP	GO:0001822	kidney development	39/1057	303/18800	1.19e-06	0.00013143	0.00010295	SFRP1/ERBB4/CTNNB1/SDC4/LGR4/VEGFA/WNK4/PKHD1/GPC3/PBX1/COL4A3/JAG1/PROX1/EGR1/IQGAP1/PKD2/ZMPSTE24/COL4A4/BICC1/POU3F3/EPCAM/LAMA5/SIM1/PAX2/SALL1/SDC1/YAP1/NIPBL/NF1/SMAD5/TACSTD2/MEF2C/MAGED1/TFAP2B/SOX4/SMAD2/STAT1/PDGFA/AP2B1	39
GO:0060562	BP	GO:0060562	epithelial tube morphogenesis	41/1057	328/18800	1.37e-06	0.00014847	0.0001163	EGF/SFRP1/CTNNB1/SDC4/TMED2/LGR4/CASR/SPINT2/VEGFA/WNK4/PKHD1/GPC3/PBX1/PROX1/PLXNB2/PKD2/HECTD1/MIB1/FZD6/FOLR1/SPINT1/LAMA5/DDR1/FOXP1/SOSTDC1/PAX2/BRD2/SALL1/YAP1/PRKACB/SETD2/COL4A1/TACSTD2/ARHGAP35/MEF2C/HIF1A/MAGED1/HOXA5/SOX4/OPA1/RHOB	41
GO:0030177	BP	GO:0030177	positive regulation of Wnt signaling pathway	24/1057	144/18800	1.58e-06	0.00016691	0.00013074	EGF/SFRP1/ATP6V0C/WLS/LGR4/GPC3/ATP6AP2/WNK1/TBL1XR1/USP34/TMEM9/MACF1/PBXIP1/JUP/FGF9/TNKS2/SALL1/SPIN1/YAP1/XIAP/SMARCA4/SOX4/PPM1A/DDX3X	24
GO:0048545	BP	GO:0048545	response to steroid hormone	41/1057	330/18800	1.6e-06	0.00016691	0.00013074	ATP1A1/SPP1/SFRP1/DDX17/FOS/CALR/IGFBP7/CYP1B1/ZFP36L1/THBS1/FOSB/IGFBP2/HSPA1B/HSD11B2/ESRRG/ZFP36/SREBF1/ARID1A/ATP2B1/IGF1R/UFL1/ZMIZ1/FOXP1/HNRNPU/GLB1/AGL/PAM/SDC1/PIAS2/YAP1/CLDN4/KLF9/SMARCA4/NCOR1/UBE3A/TFPI/STRN3/REST/ZFP36L2/DDRGK1/HSPA1A	41
GO:0010810	BP	GO:0010810	regulation of cell-substrate adhesion	31/1057	217/18800	1.64e-06	0.00016737	0.0001311	SFRP1/CALR/PLAU/SDC4/THBS1/VEGFA/PKHD1/ACTN4/JAG1/PTPRA/SLK/UTRN/MACF1/DDR1/LIMCH1/FLNA/JUP/VCL/P4HB/CARMIL1/PHLDB2/NF1/TACSTD2/DOCK1/RIN2/HSD17B12/ARHGAP6/NEDD9/EPB41L5/CDC42/CASK	31
GO:0030099	BP	GO:0030099	myeloid cell differentiation	46/1057	391/18800	1.76e-06	0.00017588	0.00013777	APP/SFRP1/CD81/FOS/CTNNB1/ZFP36L1/JUNB/VEGFA/HIPK2/GPC3/SCIN/JAG1/HSPA1B/ZFP36/ATP6AP1/ACVR1B/PRKDC/UFL1/ITGB6/NDFIP1/FOXP1/JUN/LBR/KITLG/NF1/SMAD5/KMT2E/CUL4A/P4HTM/ITGB8/MEF2C/HIF1A/MFHAS1/PURB/ADAR/MYH9/HOXA5/SNRK/SP3/STAT3/PTBP3/CDC42/AP3B1/WDR1/STAT1/HSPA1A	46
GO:0007229	BP	GO:0007229	integrin-mediated signaling pathway	20/1057	107/18800	1.86e-06	0.00018145	0.00014213	ITGB1/CD47/PTPRA/DST/ITGA6/ITGAV/ITGA2/LAMA5/ERBIN/ITGB6/ADAM10/FLNA/CD63/ITGB5/DOCK1/PRKD1/ITGB8/MYH9/NEDD9/CDC42	20
GO:0048511	BP	GO:0048511	rhythmic process	38/1057	297/18800	1.88e-06	0.00018145	0.00014213	PPP1CB/CYP1B1/LGR4/NTRK2/PPARGC1A/PROX1/EGR1/PRKAA2/SREBF1/SFPQ/BHLHE40/KMT2A/HSPA5/OGT/GNAQ/IGF1R/PRKDC/HUWE1/HNRNPU/KDM5A/SETX/PAM/DDB1/DYRK1A/CLDN4/ADNP/KLF9/USP9X/CUL4A/NRIP1/SP1/MAGED1/NCOR1/UBE3A/GFPT1/JUND/PRKAA1/TARDBP	38
GO:0001666	BP	GO:0001666	response to hypoxia	37/1057	286/18800	1.96e-06	0.00018611	0.00014578	ATP1B1/MALAT1/SFRP1/HSP90B1/TMBIM6/PLAU/CXCL12/ZFP36L1/THBS1/CASR/ITPR1/VEGFA/MDM4/HIPK2/ACTN4/ITPR2/CPEB2/EGR1/HSD11B2/PLOD2/NPEPPS/ITGA2/HYOU1/PAM/DDAH1/P4HB/NF1/AK4/SOD3/HIF1A/CLDN3/BIRC2/PRKAA1/NDRG1/REST/PDGFA/ATF2	37
GO:0090316	BP	GO:0090316	positive regulation of intracellular protein transport	25/1057	156/18800	2.02e-06	0.00018834	0.00014753	CD81/SORL1/ERBB2/CDH1/TMEM30A/BCAP31/ANK3/GAS6/NPEPPS/PCM1/C2CD5/SAR1A/FLNA/JUP/HUWE1/ZDHHC2/TCF7L2/PRKD1/SAR1B/B3GAT3/PRKAA1/PPM1A/LEPROT/CDC42/TARDBP	25
GO:0032388	BP	GO:0032388	positive regulation of intracellular transport	29/1057	198/18800	2.12e-06	0.00019044	0.00014917	CD81/SORL1/ERBB2/CDH1/TMEM30A/BCAP31/ANK3/GAS6/NPEPPS/PCM1/C2CD5/SAR1A/FLNA/JUP/HUWE1/ZDHHC2/DYNC1H1/TCF7L2/PRKD1/EZR/SAR1B/B3GAT3/PRKAA1/RAB21/PPM1A/LEPROT/RDX/CDC42/TARDBP	29
GO:0050673	BP	GO:0050673	epithelial cell proliferation	50/1057	443/18800	2.13e-06	0.00019044	0.00014917	NEAT1/EGF/SFRP1/CXCL12/CTNNB1/RTN4/ZFP36L1/LGR4/THBS1/VEGFA/SRSF6/PKHD1/GPC3/COL4A3/PROX1/ERBB2/ZFP36/NR2F2/SGPP2/HPN/LAMB1/PRKDC/JUN/RAP1GAP/EMC10/PURA/PAX2/FGF9/GRN/MAPK1/YAP1/NF1/B4GALT1/TACSTD2/TCF7L2/KLF9/PRKD1/MEF2C/SP1/HIF1A/MAGED1/MYDGF/HOXA5/STAT3/STXBP4/CDC42/PDPK1/STAT1/CASK/ATF2	50
GO:0060964	BP	GO:0060964	regulation of miRNA-mediated gene silencing	12/1057	42/18800	2.15e-06	0.00019044	0.00014917	NEAT1/ZFP36/ZMPSTE24/KCNQ1OT1/FMR1/PUM2/PUM1/EIF4G1/NCOR1/ELAVL1/STAT3/TIAL1	12
GO:0036293	BP	GO:0036293	response to decreased oxygen levels	38/1057	299/18800	2.22e-06	0.00019271	0.00015095	ATP1B1/MALAT1/SFRP1/HSP90B1/CPEB4/TMBIM6/PLAU/CXCL12/ZFP36L1/THBS1/CASR/ITPR1/VEGFA/MDM4/HIPK2/ACTN4/ITPR2/CPEB2/EGR1/HSD11B2/PLOD2/NPEPPS/ITGA2/HYOU1/PAM/DDAH1/P4HB/NF1/AK4/SOD3/HIF1A/CLDN3/BIRC2/PRKAA1/NDRG1/REST/PDGFA/ATF2	38
GO:0055067	BP	GO:0055067	monovalent inorganic cation homeostasis	25/1057	157/18800	2.28e-06	0.00019515	0.00015286	ATP1A1/ATP1B1/SLC12A1/SCNN1A/RNASEK/TMEM106B/CLCN3/ATP6AP1/ATP6AP2/CLN5/NEDD4L/KCNJ10/ATP1B2/TMEM9/TMEM165/MLLT6/SLC4A2/ATP6V0A4/SLC4A4/GRN/MAPK1/PPT1/ATP1B3/TFAP2B/UBE3A	25
GO:0070482	BP	GO:0070482	response to oxygen levels	40/1057	324/18800	2.51e-06	0.00021168	0.00016582	ATP1B1/MALAT1/SFRP1/HSP90B1/CPEB4/TMBIM6/PLAU/CXCL12/ZFP36L1/ATP6V1A/THBS1/CASR/ITPR1/VEGFA/MDM4/HIPK2/ACTN4/ITPR2/CPEB2/EGR1/HSD11B2/PLOD2/ATP6AP1/NPEPPS/ITGA2/HYOU1/PAM/DDAH1/P4HB/NF1/AK4/SOD3/HIF1A/CLDN3/BIRC2/PRKAA1/NDRG1/REST/PDGFA/ATF2	40
GO:0072080	BP	GO:0072080	nephron tubule development	18/1057	91/18800	2.6e-06	0.00021519	0.00016856	CTNNB1/LGR4/VEGFA/WNK4/GPC3/PBX1/JAG1/PKD2/POU3F3/LAMA5/PAX2/SALL1/YAP1/TACSTD2/MEF2C/MAGED1/TFAP2B/STAT1	18
GO:0050679	BP	GO:0050679	positive regulation of epithelial cell proliferation	30/1057	211/18800	2.65e-06	0.0002166	0.00016967	NEAT1/EGF/SFRP1/CXCL12/CTNNB1/RTN4/VEGFA/SRSF6/PKHD1/PROX1/ERBB2/HPN/LAMB1/JUN/EMC10/PAX2/FGF9/GRN/YAP1/NF1/B4GALT1/TCF7L2/PRKD1/SP1/HIF1A/MYDGF/STAT3/STXBP4/CDC42/PDPK1	30
GO:0050684	BP	GO:0050684	regulation of mRNA processing	23/1057	139/18800	2.94e-06	0.00023277	0.00018233	DDX17/ZFP36L1/SRSF6/CELF1/TIA1/RBM25/WTAP/TRA2A/SF1/FMR1/HNRNPU/NUDT21/TRA2B/RBM5/DYRK1A/SNRNP70/MBNL1/YTHDC1/AHCYL1/QKI/MBNL2/REST/PAPOLA	23
GO:0007043	BP	GO:0007043	cell-cell junction assembly	24/1057	149/18800	2.94e-06	0.00023277	0.00018233	CD9/CLDN16/CTNNB1/OCLN/CLDN10/UGT8/CTNND1/PKP4/PKN2/PATJ/ANK2/JUP/VCL/CLDN19/HIPK1/AFDN/CLDN4/TJP1/EPB41L3/CLDN3/CLDN7/PDCD6IP/MARVELD2/WDR1	24
GO:0006898	BP	GO:0006898	receptor-mediated endocytosis	33/1057	246/18800	3.15e-06	0.00024604	0.00019273	EGF/CANX/CD9/CD81/RNASEK/INSR/LMBRD1/ITGB1/VEGFA/SORL1/CLTC/IGF2R/LRP6/SGIP1/FOLR1/ITGAV/MKLN1/AP1G1/CTSL/HIP1/FMR1/ATAD1/CD63/HIP1R/SCARB2/LRPAP1/PPT1/M6PR/CUBN/EZR/RAB21/AP2B1/AP2A2	33
GO:0006665	BP	GO:0006665	sphingolipid metabolic process	25/1057	161/18800	3.64e-06	0.00027721	0.00021714	PSAP/TM9SF2/SERINC1/HACD3/UGT8/SGPP2/SPTLC1/SERINC3/SGMS2/SGMS1/SERINC2/GLB1/ASAH1/PPT1/PRKD1/TECR/KDSR/NAAA/ITGB8/PPP2R1A/NEU1/UGCG/CERS2/PRKAA1/ORMDL1	25
GO:0032868	BP	GO:0032868	response to insulin	34/1057	259/18800	3.66e-06	0.00027721	0.00021714	INSR/ZFP36L1/TBC1D4/LPL/SRSF6/SORL1/CPEB2/EGR1/HSD11B2/SREBF1/PTPRA/NUCKS1/ATP2B1/VPS13C/OGT/SORT1/IGF1R/PRKDC/C2CD5/SELENOS/PRKCI/YWHAG/PHIP/EPM2AIP1/KL/RARRES2/SP1/PRKAA1/STXBP4/PDPK1/STAT1/PIK3C2A/RHOQ/EIF4EBP2	34
GO:0048024	BP	GO:0048024	regulation of mRNA splicing, via spliceosome	19/1057	103/18800	4.11e-06	0.00030693	0.00024042	DDX17/SRSF6/CELF1/TIA1/RBM25/WTAP/TRA2A/SF1/FMR1/HNRNPU/TRA2B/RBM5/DYRK1A/SNRNP70/MBNL1/YTHDC1/QKI/MBNL2/REST	19
GO:0001657	BP	GO:0001657	ureteric bud development	18/1057	94/18800	4.22e-06	0.00031086	0.0002435	SFRP1/CTNNB1/SDC4/LGR4/VEGFA/GPC3/PBX1/PKD2/EPCAM/LAMA5/SIM1/PAX2/SALL1/SDC1/SMAD5/TACSTD2/MAGED1/SMAD2	18
GO:0043434	BP	GO:0043434	response to peptide hormone	46/1057	404/18800	4.28e-06	0.00031086	0.0002435	BSG/CXCL12/CYP1B1/INSR/ZFP36L1/TBC1D4/GCGR/LPL/SRSF6/SORL1/CPEB2/EGR1/HSD11B2/SREBF1/PTPRA/LRP6/NUCKS1/PLCB1/ATP2B1/VPS13C/OGT/SORT1/IGF1R/PRKDC/GDF15/C2CD5/SELENOS/PRKCI/YWHAG/PHIP/BTG2/EPM2AIP1/KL/RARRES2/SP1/AHCYL1/STAT3/JUND/PRKAA1/STXBP4/LEPROT/PDPK1/STAT1/PIK3C2A/RHOQ/EIF4EBP2	46
GO:0000381	BP	GO:0000381	regulation of alternative mRNA splicing, via spliceosome	14/1057	60/18800	4.42e-06	0.00031647	0.0002479	DDX17/SRSF6/CELF1/TIA1/RBM25/WTAP/FMR1/HNRNPU/TRA2B/RBM5/MBNL1/YTHDC1/MBNL2/REST	14
GO:0001952	BP	GO:0001952	regulation of cell-matrix adhesion	21/1057	123/18800	4.72e-06	0.00033142	0.00025961	SFRP1/PLAU/SDC4/THBS1/VEGFA/PKHD1/JAG1/PTPRA/SLK/UTRN/MACF1/DDR1/LIMCH1/JUP/VCL/PHLDB2/NF1/RIN2/ARHGAP6/EPB41L5/CASK	21
GO:0032469	BP	GO:0032469	endoplasmic reticulum calcium ion homeostasis	9/1057	25/18800	4.89e-06	0.00033142	0.00025961	APP/TMBIM6/ITPR1/TMCO1/ATP2A2/BCAP31/GRINA/CCDC47/HERPUD1	9
GO:0048732	BP	GO:0048732	gland development	48/1057	431/18800	4.91e-06	0.00033142	0.00025961	EGF/SFRP1/ERBB4/WLS/PSAP/CTNNB1/CYP1B1/RTN4/INSR/CADM1/VEGFA/PBX1/PROX1/IGF2R/HOXB3/CDH1/PKD2/ZMPSTE24/MAN2A1/IGSF3/HPN/ASH1L/NTN4/ITGA2/PRLR/LAMA5/DDR1/JUN/RAP1GAP/ARHGAP5/SEC63/SOSTDC1/ZDHHC21/PAM/SALL1/MAPK1/NF1/TFCP2L1/ARHGAP35/HIF1A/UBE3A/HOXA5/SP3/PRKCSH/CDC42/SMAD2/PDGFA/ATF2	48
GO:0072163	BP	GO:0072163	mesonephric epithelium development	18/1057	95/18800	4.94e-06	0.00033142	0.00025961	SFRP1/CTNNB1/SDC4/LGR4/VEGFA/GPC3/PBX1/PKD2/EPCAM/LAMA5/SIM1/PAX2/SALL1/SDC1/SMAD5/TACSTD2/MAGED1/SMAD2	18
GO:0072164	BP	GO:0072164	mesonephric tubule development	18/1057	95/18800	4.94e-06	0.00033142	0.00025961	SFRP1/CTNNB1/SDC4/LGR4/VEGFA/GPC3/PBX1/PKD2/EPCAM/LAMA5/SIM1/PAX2/SALL1/SDC1/SMAD5/TACSTD2/MAGED1/SMAD2	18
GO:0007565	BP	GO:0007565	female pregnancy	27/1057	185/18800	5.04e-06	0.00033247	0.00026043	SPP1/BSG/FOS/CALR/IGFBP7/TMED2/JUNB/ACSL4/LNPEP/FOSB/VEGFA/IGFBP2/HSD11B2/NR2F2/ACVR1B/ASH1L/ITGA2/PRLR/DDR1/VMP1/SLC38A2/YTHDF3/SLC38A1/PAM/CLDN4/CTSB/SP3	27
GO:0044403	BP	GO:0044403	biological process involved in symbiotic interaction	36/1057	286/18800	5.08e-06	0.00033247	0.00026043	CD81/BSG/RNASEK/CD46/INSR/ITGB1/PPIB/HSPA1B/LAMP1/IGF2R/NUCKS1/ITGAV/GAS6/HPN/ITGA2/CXADR/CTSL/ITGB6/JUN/FMR1/IST1/SCARB2/ITGB5/P4HB/DDB1/THOC2/CTSB/ARL8B/SLC1A5/SP1/SLC3A2/SMARCA4/REST/WWP1/TARDBP/HSPA1A	36
GO:0006643	BP	GO:0006643	membrane lipid metabolic process	29/1057	207/18800	5.21e-06	0.00033721	0.00026414	PSAP/TM9SF2/CYP1B1/SERINC1/HACD3/UGT8/SGPP2/SPTLC1/SERINC3/DPM3/SGMS2/SGMS1/SERINC2/GLB1/GPAA1/ASAH1/PPT1/PRKD1/TECR/KDSR/NAAA/ITGB8/PPP2R1A/MGST2/NEU1/UGCG/CERS2/PRKAA1/ORMDL1	29
GO:0007034	BP	GO:0007034	vacuolar transport	24/1057	155/18800	5.95e-06	0.00038025	0.00029786	PSAP/TMEM106B/SORL1/TMEM50B/LAMP1/IGF2R/VPS13C/LAMP2/VPS13A/SORT1/AP1G1/TMEM50A/NDFIP1/SCARB2/GRN/M6PR/ARL8B/ZFYVE16/NDFIP2/GCC2/LEPROT/AP3B1/RHOB/HSPA1A	24
GO:0072006	BP	GO:0072006	nephron development	23/1057	145/18800	6.13e-06	0.00038391	0.00030072	ERBB4/CTNNB1/LGR4/VEGFA/WNK4/GPC3/PBX1/COL4A3/JAG1/EGR1/IQGAP1/PKD2/COL4A4/POU3F3/LAMA5/PAX2/SALL1/YAP1/TACSTD2/MEF2C/MAGED1/TFAP2B/STAT1	23
GO:0061462	BP	GO:0061462	protein localization to lysosome	12/1057	46/18800	6.15e-06	0.00038391	0.00030072	CD81/RTN4/LMBRD1/SORL1/LAMP2/SORT1/SCARB2/MFSD1/M6PR/ZFYVE16/GCC2/AP3B1	12
GO:1903034	BP	GO:1903034	regulation of response to wounding	25/1057	166/18800	6.35e-06	0.0003919	0.00030699	SPP1/CD9/KNG1/PLAU/ITGB1/OCLN/THBS1/SRSF6/MYLK/SERPING1/TSPAN8/IGF1R/FLNA/CLDN19/PHLDB2/GRN/CLDN4/ANO6/CLDN3/CERS2/ARFGEF1/TFPI/PDGFA/CASK/VKORC1	25
GO:2000736	BP	GO:2000736	regulation of stem cell differentiation	14/1057	62/18800	6.66e-06	0.00039967	0.00031307	N4BP2L2/JAG1/PRKDC/SOX6/HNRNPU/NUDT21/LTBP3/YAP1/CDK12/TACSTD2/STAT3/OCIAD1/REST/ZFP36L2	14
GO:1902307	BP	GO:1902307	positive regulation of sodium ion transmembrane transport	8/1057	20/18800	6.67e-06	0.00039967	0.00031307	ATP1B1/WNK4/ACTN4/ANK3/ATP1B2/WNK1/FXYD2/ATP1B3	8
GO:0045807	BP	GO:0045807	positive regulation of endocytosis	18/1057	97/18800	6.71e-06	0.00039967	0.00031307	EGF/INSR/VEGFA/GPC3/MIB1/SGIP1/NEDD4L/ITGA2/HIP1/FMR1/ATAD1/CD63/PPT1/ANO6/CD151/RAB21/CDC42/AP2B1	18
GO:0006397	BP	GO:0006397	mRNA processing	53/1057	500/18800	6.82e-06	0.0004021	0.00031497	HNRNPH1/APP/DDX17/ZFP36L1/SRSF6/PPARGC1A/CELF1/RBM6/TIA1/RBM25/RNPC3/SFPQ/WTAP/TRA2A/LUC7L3/SF1/FMR1/HNRNPU/NUDT21/SETX/TRA2B/RBM5/RBM26/TENT2/SCAF11/DHX15/SF3B1/DYRK1A/SNRNP70/SUGP2/THOC2/SREK1/PRPF4B/CDK12/SRSF11/PTBP2/ZC3H13/MBNL1/SRRM2/PRPF8/ADAR/YTHDC1/AHCYL1/QKI/MBNL2/PTBP3/CNOT6L/SYNCRIP/REST/PNN/PAPOLA/TARDBP/LUC7L2	53
GO:0001763	BP	GO:0001763	morphogenesis of a branching structure	28/1057	199/18800	6.93e-06	0.00040409	0.00031653	EGF/SFRP1/CTNNB1/RTN4/TMED2/LGR4/CASR/SPINT2/VEGFA/PKHD1/GPC3/PBX1/PROX1/PKD2/SPINT1/NTN4/LAMA5/DDR1/RERE/PAX2/SALL1/YAP1/SETD2/COL4A1/TACSTD2/MAGED1/HOXA5/PDGFA	28
GO:0034620	BP	GO:0034620	cellular response to unfolded protein	18/1057	98/18800	7.79e-06	0.00044909	0.00035178	TMBIM6/TMED2/CREB3L2/HSPA1B/AMFR/TMEM33/HSPA5/DNAJC10/ERMP1/UFL1/SELENOS/DNAJB9/OS9/HERPUD1/MBTPS1/ERLEC1/DDRGK1/HSPA1A	18
GO:0007160	BP	GO:0007160	cell-matrix adhesion	31/1057	235/18800	8.78e-06	0.00049133	0.00038487	SFRP1/PLAU/CTNNB1/SDC4/ITGB1/THBS1/VEGFA/PKHD1/JAG1/PTPRA/ITGA6/ITGAV/SLK/ITGA2/MKLN1/UTRN/MACF1/DDR1/ITGB6/TRPM7/LIMCH1/JUP/CD63/VCL/ITGB5/PHLDB2/NF1/RIN2/ARHGAP6/EPB41L5/CASK	31
GO:0051222	BP	GO:0051222	positive regulation of protein transport	36/1057	293/18800	8.79e-06	0.00049133	0.00038487	CD81/WLS/ACSL3/ACSL4/CASR/ATP2C1/SORL1/TMED10/ERBB2/CDH1/TMEM30A/BCAP31/ANK3/GAS6/NPEPPS/PCM1/C2CD5/SAR1A/GOLPH3/FLNA/JUP/HUWE1/ZDHHC2/MYH10/TCF7L2/PRKD1/EZR/SAR1B/HIF1A/B3GAT3/PRKAA1/SOX4/PPM1A/LEPROT/CDC42/TARDBP	36
GO:0031346	BP	GO:0031346	positive regulation of cell projection organization	40/1057	341/18800	8.8e-06	0.00049133	0.00038487	NPTN/CXCL12/PROM2/PLXNB1/CREB3L2/OCLN/TMEM106B/VEGFA/NTRK2/KIDINS220/OBSL1/PLXNB2/TMEM30A/AGRN/ITGA6/NCKAP1/HSPA5/ATP1B2/ITGA2/MACF1/IGF1R/FMR1/FLNA/IST1/GOLGA4/PRKCI/SCARB2/SETX/CARMIL1/GRN/ADNP/PRKD1/EPS8L2/ARHGAP35/CAPRIN1/ABI2/RAB21/CDC42/RHOQ/METRN	40
GO:0001823	BP	GO:0001823	mesonephros development	18/1057	99/18800	9.03e-06	0.00049876	0.00039069	SFRP1/CTNNB1/SDC4/LGR4/VEGFA/GPC3/PBX1/PKD2/EPCAM/LAMA5/SIM1/PAX2/SALL1/SDC1/SMAD5/TACSTD2/MAGED1/SMAD2	18
GO:0090150	BP	GO:0090150	establishment of protein localization to membrane	33/1057	259/18800	9.6e-06	0.00052517	0.00041137	ATP1B1/ACSL3/MAL/SPTBN1/ATP2C1/SSR1/ERBB2/ATP6AP1/PREPL/ANK3/TRAM1/ARL6IP1/CLSTN1/SIL1/HSPA5/CCDC47/MACF1/C2CD5/GOLPH3/ATAD1/EMC10/ZDHHC14/ZDHHC2/SEC63/ZDHHC21/GOLGA4/PRKCI/RAB3GAP1/AFDN/SEC62/GGA2/RAB3IP/AP3B1	33
GO:0032507	BP	GO:0032507	maintenance of protein location in cell	14/1057	64/18800	9.87e-06	0.00052882	0.00041423	SORL1/SCIN/ANK3/VPS13C/HSPA5/VPS13A/SUN1/GOLPH3/HNRNPU/GPAA1/SYNE1/OS9/KDELR2/RER1	14
GO:0034063	BP	GO:0034063	stress granule assembly	9/1057	27/18800	1.01e-05	0.00052882	0.00041423	PRKAA2/TIA1/YTHDF3/PRRC2C/PUM2/G3BP1/DYNC1H1/PRKAA1/DDX3X	9
GO:0070861	BP	GO:0070861	regulation of protein exit from endoplasmic reticulum	9/1057	27/18800	1.01e-05	0.00052882	0.00041423	CD81/SORL1/TMEM30A/BCAP31/SAR1A/OS9/SAR1B/GCC2/ERLEC1	9
GO:0071383	BP	GO:0071383	cellular response to steroid hormone stimulus	28/1057	203/18800	1.02e-05	0.00052882	0.00041423	ATP1A1/SFRP1/DDX17/CALR/CYP1B1/ZFP36L1/HSPA1B/ESRRG/ZFP36/ARID1A/ATP2B1/IGF1R/UFL1/ZMIZ1/FOXP1/HNRNPU/PIAS2/YAP1/KLF9/SMARCA4/NCOR1/UBE3A/TFPI/STRN3/REST/ZFP36L2/DDRGK1/HSPA1A	28
GO:0006888	BP	GO:0006888	endoplasmic reticulum to Golgi vesicle-mediated transport	21/1057	129/18800	1.02e-05	0.00052882	0.00041423	LMAN1/TMED2/CREB3L2/TMED7/SORL1/TMED10/BCAP31/TMED4/MIA2/SAR1A/HYOU1/SEC22B/COPA/YIPF4/TRIP11/SAR1B/KDELR2/TMED9/SEC31A/YIPF5/COPG1	21
GO:1905897	BP	GO:1905897	regulation of response to endoplasmic reticulum stress	16/1057	82/18800	1.11e-05	0.00056163	0.00043994	TMBIM6/BCAP31/GRINA/TMEM33/HSPA5/SERINC3/TMEM259/UFL1/SELENOS/HYOU1/DNAJB9/HERPUD1/OPA1/MANF/DDRGK1/HSPA1A	16
GO:0007042	BP	GO:0007042	lysosomal lumen acidification	6/1057	11/18800	1.13e-05	0.00056163	0.00043994	TMEM106B/ATP6AP2/CLN5/TMEM9/GRN/PPT1	6
GO:0072017	BP	GO:0072017	distal tubule development	6/1057	11/18800	1.13e-05	0.00056163	0.00043994	WNK4/JAG1/PKD2/POU3F3/PAX2/TFAP2B	6
GO:0060828	BP	GO:0060828	regulation of canonical Wnt signaling pathway	33/1057	261/18800	1.13e-05	0.00056163	0.00043994	EGF/SFRP1/WLS/CTNNB1/LGR4/IGFBP2/GPC3/EGR1/AMFR/CTNND1/BICC1/ATP6AP2/FZD6/FOLR1/WNK1/GNAQ/TBL1XR1/USP34/TMEM9/JUP/SOSTDC1/FGF9/TNKS2/G3BP1/YAP1/TLE5/TCF7L2/XIAP/JADE1/SOX4/PPM1A/DDX3X/CSNK1A1	33
GO:0010498	BP	GO:0010498	proteasomal protein catabolic process	52/1057	496/18800	1.13e-05	0.00056163	0.00043994	CANX/HSP90B1/MAN1A1/CALR/CTNNB1/HSPA1B/AMFR/PCBP2/NHLRC3/HECTD1/STT3B/BCAP31/SEL1L/XPO1/JKAMP/HSPA5/OGT/DNAJC10/NEDD4L/CCDC47/TMEM259/TBL1XR1/UFL1/WDR26/ERLIN2/SELENOS/TRIM2/FMR1/HUWE1/DNAJB9/DDB1/LTN1/ZYG11B/CUL4A/TRIP12/ANKIB1/OS9/HERPUD1/PPP2CB/DNAJB14/BIRC2/FBXL5/SPSB3/CUL5/WAC/ERLEC1/HM13/UBXN4/WWP1/CSNK1A1/DDRGK1/HSPA1A	52
GO:0001503	BP	GO:0001503	ossification	46/1057	420/18800	1.19e-05	0.00058386	0.00045735	SPP1/SFRP1/CRIM1/CTNNB1/COL6A1/TMEM38B/JUNB/PLXNB1/LGR4/CASR/GPC3/PBX1/JAG1/FGFR3/CLTC/NELL1/ZMPSTE24/IL6ST/RRBP1/ATP2B1/SORT1/CCDC47/TOB1/UFL1/PTH1R/SGMS2/HNRNPU/ATP6V0A4/LTBP3/FGF9/MAPK1/YAP1/MESD/NIPBL/NF1/SMAD5/ANO6/KL/PRKD1/MEF2C/HIF1A/ADAR/SP3/JUND/SYNCRIP/REST	46
GO:0042176	BP	GO:0042176	regulation of protein catabolic process	44/1057	395/18800	1.2e-05	0.00058417	0.00045759	EGF/CD81/CST3/MDM4/HIPK2/SORL1/GPC3/HSPA1B/CDH1/NELL1/HECTD1/BCAP31/PTTG1IP/XPO1/OGT/NEDD4L/CTSC/TMEM259/TMEM9/UFL1/HMGCR/NDFIP1/SEC22B/FMR1/FLNA/HUWE1/ZDHHC2/DDB1/SNRNP70/CTSA/LAPTM4B/ZYG11B/CYP51A1/ANKIB1/EZR/HERPUD1/FBXL5/UBE3A/WAC/RDX/WWP1/CSNK1A1/DDRGK1/HSPA1A	44
GO:0032869	BP	GO:0032869	cellular response to insulin stimulus	28/1057	205/18800	1.23e-05	0.0005907	0.00046271	INSR/ZFP36L1/TBC1D4/LPL/SORL1/CPEB2/SREBF1/PTPRA/NUCKS1/ATP2B1/OGT/IGF1R/PRKDC/C2CD5/SELENOS/PRKCI/YWHAG/PHIP/KL/RARRES2/SP1/PRKAA1/STXBP4/PDPK1/STAT1/PIK3C2A/RHOQ/EIF4EBP2	28
GO:0035751	BP	GO:0035751	regulation of lysosomal lumen pH	7/1057	16/18800	1.27e-05	0.00060242	0.00047189	TMEM106B/ATP6AP2/CLN5/TMEM9/TMEM165/GRN/PPT1	7
GO:0072009	BP	GO:0072009	nephron epithelium development	19/1057	111/18800	1.27e-05	0.00060242	0.00047189	CTNNB1/LGR4/VEGFA/WNK4/GPC3/PBX1/JAG1/IQGAP1/PKD2/POU3F3/LAMA5/PAX2/SALL1/YAP1/TACSTD2/MEF2C/MAGED1/TFAP2B/STAT1	19
GO:0035148	BP	GO:0035148	tube formation	23/1057	152/18800	1.36e-05	0.00063875	0.00050035	EGF/SFRP1/CTNNB1/SDC4/TMED2/SPINT2/VEGFA/PROX1/PLXNB2/HECTD1/MIB1/FZD6/FOLR1/SPINT1/PAX2/BRD2/PRKACB/SETD2/ARHGAP35/HIF1A/SOX4/OPA1/YWHAZ	23
GO:0071560	BP	GO:0071560	cellular response to transforming growth factor beta stimulus	32/1057	252/18800	1.4e-05	0.00065021	0.00050933	SFRP1/FOS/ZFP36L1/THBS1/HIPK2/GLG1/FOLR1/COL4A2/HSPA5/IGF1R/ITGB6/ZMIZ1/GDF15/JUN/SOX6/LTBP3/ITGB5/SMAD5/USP9X/ZNF451/PEG10/TRIM33/ITGB8/MEF2C/STAT3/EPB41L5/PPM1A/SMAD2/PDPK1/PDGFA/ZFP36L2/HSPA1A	32
GO:0034249	BP	GO:0034249	negative regulation of cellular amide metabolic process	34/1057	276/18800	1.46e-05	0.000675	0.00052874	CPEB4/CALR/RTN4/ZFP36L1/NTRK2/SORL1/CELF1/CPEB2/ZFP36/TIA1/RTN3/TNRC6A/TNRC6B/TOB1/YTHDF3/FMR1/HNRNPU/PURA/BTG2/PUM1/DAPK1/XRN1/CAPRIN1/LARP1/PRKAA1/TUT4/CNOT6L/ILF3/SYNCRIP/DDX3X/ORMDL1/TARDBP/ZFP36L2/EIF4EBP2	34
GO:1905477	BP	GO:1905477	positive regulation of protein localization to membrane	18/1057	103/18800	1.59e-05	0.0007286	0.00057073	SLC5A3/CD81/ITGB1/ACSL3/SPTBN1/ATP2C1/ERBB2/ANK3/C2CD5/ZDHHC2/PGRMC1/PRKCI/MESD/KIF5B/EZR/PDPK1/RER1/AP2B1	18
GO:0021915	BP	GO:0021915	neural tube development	23/1057	154/18800	1.69e-05	0.00076672	0.00060059	SFRP1/SDC4/TMED2/ZFP36L1/SPINT2/PROX1/PLXNB2/PKD2/HECTD1/MIB1/ATP6AP2/FZD6/FOLR1/SPINT1/PAX2/BRD2/PRKACB/SETD2/NF1/ARHGAP35/HIF1A/SOX4/OPA1	23
GO:1901652	BP	GO:1901652	response to peptide	51/1057	491/18800	1.77e-05	0.00079466	0.00062247	APP/BSG/CXCL12/CYP1B1/INSR/ZFP36L1/TBC1D4/CASR/GCGR/LPL/SRSF6/SORL1/JAG1/CPEB2/EGR1/HSD11B2/SREBF1/PTPRA/LRP6/NUCKS1/PLCB1/ATP2B1/VPS13C/OGT/SORT1/IGF1R/PRKDC/ERBIN/GDF15/C2CD5/SELENOS/PRKCI/LGMN/YWHAG/PHIP/BTG2/EPM2AIP1/KL/RARRES2/SP1/AHCYL1/STAT3/JUND/PRKAA1/STXBP4/LEPROT/PDPK1/STAT1/PIK3C2A/RHOQ/EIF4EBP2	51
GO:0030968	BP	GO:0030968	endoplasmic reticulum unfolded protein response	15/1057	76/18800	1.8e-05	0.00080097	0.00062741	TMED2/CREB3L2/AMFR/TMEM33/HSPA5/DNAJC10/ERMP1/UFL1/SELENOS/DNAJB9/OS9/HERPUD1/MBTPS1/ERLEC1/DDRGK1	15
GO:0001841	BP	GO:0001841	neural tube formation	18/1057	104/18800	1.83e-05	0.00080097	0.00062741	SFRP1/SDC4/TMED2/SPINT2/PLXNB2/HECTD1/MIB1/FZD6/FOLR1/SPINT1/PAX2/BRD2/PRKACB/SETD2/ARHGAP35/HIF1A/SOX4/OPA1	18
GO:0006892	BP	GO:0006892	post-Golgi vesicle-mediated transport	18/1057	104/18800	1.83e-05	0.00080097	0.00062741	ACSL3/SPTBN1/ATP2C1/SORL1/LAMP1/PREPL/ANK3/VPS13C/VPS13A/SORT1/SCAMP1/AP1G1/MACF1/MON2/GOLPH3/ARFGEF2/GOLGA4/GGA2	18
GO:0030218	BP	GO:0030218	erythrocyte differentiation	20/1057	124/18800	1.89e-05	0.00082091	0.00064304	ZFP36L1/VEGFA/HIPK2/HSPA1B/ZFP36/ACVR1B/PRKDC/UFL1/SMAD5/KMT2E/P4HTM/HIF1A/MFHAS1/ADAR/HOXA5/SP3/STAT3/PTBP3/STAT1/HSPA1A	20
GO:0002474	BP	GO:0002474	antigen processing and presentation of peptide antigen via MHC class I	9/1057	29/18800	1.95e-05	0.00084243	0.00065989	CALR/LNPEP/IFI30/PDIA3/HLA-C/HLA-E/SAR1B/HLA-A/HLA-B	9
GO:0052126	BP	GO:0052126	movement in host environment	25/1057	177/18800	1.98e-05	0.00084469	0.00066166	CD81/BSG/RNASEK/CD46/INSR/ITGB1/HSPA1B/LAMP1/ITGAV/GAS6/ITGA2/CXADR/CTSL/ITGB6/IST1/SCARB2/ITGB5/P4HB/DDB1/CTSB/ARL8B/SLC1A5/SLC3A2/WWP1/HSPA1A	25
GO:0070997	BP	GO:0070997	neuron death	40/1057	353/18800	1.99e-05	0.00084469	0.00066166	APP/CPEB4/FOS/CTNNB1/NTRK2/HIPK2/SORL1/PPARGC1A/EGR1/GPNMB/IL6ST/HSPA5/TMEM259/CHL1/LANCL1/JUN/TRIM2/HYOU1/PRKCI/LGMN/BTG2/GRN/PPT1/ADNP/NF1/ARL6IP5/OXR1/GBE1/MEF2C/EIF4G1/HIF1A/XIAP/TFAP2B/ATN1/TBC1D24/REST/CDC42/AP2B1/ATF2/FOXQ1	40
GO:0072665	BP	GO:0072665	protein localization to vacuole	14/1057	68/18800	2.06e-05	0.00086712	0.00067923	CD81/RTN4/LMBRD1/SORL1/VPS13C/LAMP2/VPS13A/SORT1/SCARB2/MFSD1/M6PR/ZFYVE16/GCC2/AP3B1	14
GO:0000380	BP	GO:0000380	alternative mRNA splicing, via spliceosome	15/1057	77/18800	2.12e-05	0.00088497	0.00069322	DDX17/SRSF6/CELF1/TIA1/RBM25/SFPQ/WTAP/FMR1/HNRNPU/TRA2B/RBM5/MBNL1/YTHDC1/MBNL2/REST	15
GO:0046718	BP	GO:0046718	viral entry into host cell	22/1057	146/18800	2.22e-05	0.00091813	0.00071919	CD81/BSG/RNASEK/CD46/INSR/ITGB1/HSPA1B/LAMP1/ITGAV/GAS6/ITGA2/CXADR/CTSL/ITGB6/SCARB2/ITGB5/P4HB/CTSB/SLC1A5/SLC3A2/WWP1/HSPA1A	22
GO:0006622	BP	GO:0006622	protein targeting to lysosome	8/1057	23/18800	2.23e-05	0.00091813	0.00071919	SORL1/LAMP2/SORT1/SCARB2/M6PR/ZFYVE16/GCC2/AP3B1	8
GO:0071559	BP	GO:0071559	response to transforming growth factor beta	32/1057	258/18800	2.26e-05	0.00092008	0.00072072	SFRP1/FOS/ZFP36L1/THBS1/HIPK2/GLG1/FOLR1/COL4A2/HSPA5/IGF1R/ITGB6/ZMIZ1/GDF15/JUN/SOX6/LTBP3/ITGB5/SMAD5/USP9X/ZNF451/PEG10/TRIM33/ITGB8/MEF2C/STAT3/EPB41L5/PPM1A/SMAD2/PDPK1/PDGFA/ZFP36L2/HSPA1A	32
GO:0071375	BP	GO:0071375	cellular response to peptide hormone stimulus	35/1057	294/18800	2.3e-05	0.00092221	0.00072239	CYP1B1/INSR/ZFP36L1/TBC1D4/GCGR/LPL/SORL1/CPEB2/SREBF1/PTPRA/NUCKS1/PLCB1/ATP2B1/OGT/IGF1R/PRKDC/GDF15/C2CD5/SELENOS/PRKCI/YWHAG/PHIP/KL/RARRES2/SP1/AHCYL1/STAT3/PRKAA1/STXBP4/LEPROT/PDPK1/STAT1/PIK3C2A/RHOQ/EIF4EBP2	35
GO:1903573	BP	GO:1903573	negative regulation of response to endoplasmic reticulum stress	11/1057	44/18800	2.32e-05	0.00092221	0.00072239	TMBIM6/GRINA/HSPA5/UFL1/SELENOS/HYOU1/DNAJB9/HERPUD1/OPA1/DDRGK1/HSPA1A	11
GO:0032970	BP	GO:0032970	regulation of actin filament-based process	43/1057	393/18800	2.33e-05	0.00092221	0.00072239	SFRP1/CXCL12/SDC4/CGNL1/AKAP9/SPTBN1/CYFIP2/DSG2/CD47/SCIN/PROX1/IQGAP1/ATP2A2/NCKAP1/PLEKHH2/DSP/ANK2/LIMCH1/SPTAN1/FLNA/TAOK1/JUP/RHOBTB3/BST2/HIP1R/PAM/RICTOR/ADD3/CARMIL1/PHLDB2/TACSTD2/TJP1/ARHGAP35/ARHGAP6/MYH9/ABI2/ARFGEF1/RDX/CDC42/WDR1/PDGFA/RHOB/RHOQ	43
GO:0072175	BP	GO:0072175	epithelial tube formation	21/1057	136/18800	2.33e-05	0.00092221	0.00072239	EGF/SFRP1/CTNNB1/SDC4/TMED2/SPINT2/PROX1/PLXNB2/HECTD1/MIB1/FZD6/FOLR1/SPINT1/PAX2/BRD2/PRKACB/SETD2/ARHGAP35/HIF1A/SOX4/OPA1	21
GO:0044706	BP	GO:0044706	multi-multicellular organism process	28/1057	213/18800	2.51e-05	0.00098549	0.00077196	SPP1/BSG/FOS/CALR/IGFBP7/TMED2/JUNB/ACSL4/LNPEP/FOSB/VEGFA/IGFBP2/HSD11B2/NR2F2/ACVR1B/ASH1L/ITGA2/PRLR/DDR1/VMP1/SLC38A2/YTHDF3/SLC38A1/PAM/CLDN4/B4GALT1/CTSB/SP3	28
GO:0006623	BP	GO:0006623	protein targeting to vacuole	10/1057	37/18800	2.62e-05	0.0010173	0.00079687	SORL1/VPS13C/LAMP2/VPS13A/SORT1/SCARB2/M6PR/ZFYVE16/GCC2/AP3B1	10
GO:0051701	BP	GO:0051701	biological process involved in interaction with host	26/1057	191/18800	2.63e-05	0.0010173	0.00079687	CD81/BSG/RNASEK/CD46/INSR/ITGB1/HSPA1B/LAMP1/ITGAV/GAS6/ITGA2/CXADR/CTSL/ITGB6/IST1/SCARB2/ITGB5/P4HB/DDB1/THOC2/CTSB/ARL8B/SLC1A5/SLC3A2/WWP1/HSPA1A	26
GO:0035967	BP	GO:0035967	cellular response to topologically incorrect protein	19/1057	117/18800	2.75e-05	0.00105535	0.00082668	TMBIM6/TMED2/CREB3L2/HSPA1B/AMFR/TMEM33/HSPA5/DNAJC10/ERMP1/UFL1/SELENOS/DNAJB9/OS9/HERPUD1/DNAJB14/MBTPS1/ERLEC1/DDRGK1/HSPA1A	19
GO:1904951	BP	GO:1904951	positive regulation of establishment of protein localization	36/1057	309/18800	2.83e-05	0.00107801	0.00084442	CD81/WLS/ACSL3/ACSL4/CASR/ATP2C1/SORL1/TMED10/ERBB2/CDH1/TMEM30A/BCAP31/ANK3/GAS6/NPEPPS/PCM1/C2CD5/SAR1A/GOLPH3/FLNA/JUP/HUWE1/ZDHHC2/MYH10/TCF7L2/PRKD1/EZR/SAR1B/HIF1A/B3GAT3/PRKAA1/SOX4/PPM1A/LEPROT/CDC42/TARDBP	36
GO:0006984	BP	GO:0006984	ER-nucleus signaling pathway	11/1057	45/18800	2.92e-05	0.00110638	0.00086665	TMED2/TMCO1/AMFR/SREBF1/ATP2A2/TMEM33/HSPA5/CCDC47/ERLIN2/SELENOS/MBTPS1	11
GO:2000737	BP	GO:2000737	negative regulation of stem cell differentiation	8/1057	24/18800	3.18e-05	0.00119807	0.00093848	N4BP2L2/JAG1/HNRNPU/YAP1/CDK12/STAT3/REST/ZFP36L2	8
GO:2000113	BP	GO:2000113	negative regulation of cellular macromolecule biosynthetic process	33/1057	275/18800	3.32e-05	0.00124184	0.00097276	ITM2B/TMEM59/CPEB4/CALR/ZFP36L1/CELF1/CPEB2/BACE2/ZFP36/TIA1/TNRC6A/TNRC6B/TOB1/SELENOS/YTHDF3/FMR1/HNRNPU/PURA/ITM2C/BTG2/PUM1/DAPK1/XRN1/CAPRIN1/LARP1/TUT4/CNOT6L/ILF3/SYNCRIP/DDX3X/TARDBP/ZFP36L2/EIF4EBP2	33
GO:0044703	BP	GO:0044703	multi-organism reproductive process	27/1057	205/18800	3.36e-05	0.00124638	0.00097631	SPP1/BSG/FOS/CALR/IGFBP7/TMED2/JUNB/ACSL4/LNPEP/FOSB/VEGFA/IGFBP2/HSD11B2/NR2F2/ACVR1B/ASH1L/ITGA2/PRLR/DDR1/VMP1/SLC38A2/YTHDF3/SLC38A1/PAM/CLDN4/CTSB/SP3	27
GO:0090263	BP	GO:0090263	positive regulation of canonical Wnt signaling pathway	18/1057	109/18800	3.52e-05	0.00129041	0.00101081	EGF/SFRP1/WLS/LGR4/GPC3/ATP6AP2/WNK1/TBL1XR1/USP34/TMEM9/JUP/FGF9/TNKS2/YAP1/XIAP/SOX4/PPM1A/DDX3X	18
GO:1905475	BP	GO:1905475	regulation of protein localization to membrane	24/1057	172/18800	3.53e-05	0.00129041	0.00101081	SLC5A3/TMEM59/CD81/ITGB1/ACSL3/SPTBN1/ATP2C1/GPC3/CLTC/ERBB2/HECTD1/ANK3/ADAM10/C2CD5/ZDHHC2/PGRMC1/PRKCI/MESD/KIF5B/EZR/PDPK1/RER1/AP2B1/RHOQ	24
GO:0030522	BP	GO:0030522	intracellular receptor signaling pathway	32/1057	264/18800	3.57e-05	0.0012964	0.0010155	SFRP1/DDX17/CALR/ACTN4/HSPA1B/ESRRG/SREBF1/PRCP/NR2F2/TSPAN6/ARID1A/ERBIN/UFL1/PLIN5/ZMIZ1/FOXP1/PUM2/PUM1/PIAS2/YAP1/ANKRD17/NR2F1/XIAP/SMARCA4/BIRC2/NCOR1/UBE3A/RIOK3/STAT3/STRN3/DDRGK1/HSPA1A	32
GO:0060070	BP	GO:0060070	canonical Wnt signaling pathway	36/1057	313/18800	3.72e-05	0.00134148	0.00105081	EGF/SFRP1/WLS/CTNNB1/LGR4/IGFBP2/GPC3/EGR1/AMFR/LRP6/CTNND1/BICC1/ATP6AP2/FZD6/FOLR1/WNK1/GNAQ/TBL1XR1/USP34/TMEM9/JUP/SOSTDC1/FGF9/RYK/TNKS2/G3BP1/SDC1/YAP1/TLE5/TCF7L2/XIAP/JADE1/SOX4/PPM1A/DDX3X/CSNK1A1	36
GO:0051402	BP	GO:0051402	neuron apoptotic process	30/1057	241/18800	3.75e-05	0.00134527	0.00105378	APP/CPEB4/CTNNB1/NTRK2/HIPK2/PPARGC1A/IL6ST/HSPA5/CHL1/LANCL1/JUN/TRIM2/HYOU1/PRKCI/LGMN/BTG2/GRN/PPT1/ADNP/NF1/OXR1/GBE1/MEF2C/HIF1A/XIAP/TFAP2B/ATN1/CDC42/ATF2/FOXQ1	30
GO:0048002	BP	GO:0048002	antigen processing and presentation of peptide antigen	13/1057	63/18800	3.94e-05	0.00140273	0.00109879	CTSD/CALR/LNPEP/IFI30/CTSL/CTSF/PDIA3/LGMN/HLA-C/HLA-E/SAR1B/HLA-A/HLA-B	13
GO:0061138	BP	GO:0061138	morphogenesis of a branching epithelium	25/1057	185/18800	4.22e-05	0.00149161	0.00116841	EGF/SFRP1/CTNNB1/TMED2/LGR4/CASR/SPINT2/VEGFA/PKHD1/GPC3/PBX1/PROX1/PKD2/SPINT1/NTN4/LAMA5/DDR1/PAX2/SALL1/YAP1/COL4A1/TACSTD2/MAGED1/HOXA5/PDGFA	25
GO:0043470	BP	GO:0043470	regulation of carbohydrate catabolic process	12/1057	55/18800	4.34e-05	0.00152525	0.00119476	APP/PPP1CB/INSR/PRKAA2/OGT/SCARB2/SLC4A4/HIF1A/ZBTB20/NCOR1/STAT3/PRKAA1	12
GO:0045646	BP	GO:0045646	regulation of erythrocyte differentiation	11/1057	47/18800	4.52e-05	0.00157683	0.00123516	ZFP36L1/HSPA1B/ZFP36/ACVR1B/PRKDC/P4HTM/HIF1A/HOXA5/STAT3/STAT1/HSPA1A	11
GO:0044409	BP	GO:0044409	entry into host	22/1057	153/18800	4.64e-05	0.00160885	0.00126025	CD81/BSG/RNASEK/CD46/INSR/ITGB1/HSPA1B/LAMP1/ITGAV/GAS6/ITGA2/CXADR/CTSL/ITGB6/SCARB2/ITGB5/P4HB/CTSB/SLC1A5/SLC3A2/WWP1/HSPA1A	22
GO:0001885	BP	GO:0001885	endothelial cell development	13/1057	64/18800	4.69e-05	0.00161649	0.00126623	COL18A1/VEGFA/RAP2C/PLCB1/VCL/ZDHHC21/AFDN/EZR/TJP1/CLDN3/VEZF1/MARVELD2/RDX	13
GO:1901215	BP	GO:1901215	negative regulation of neuron death	27/1057	209/18800	4.73e-05	0.00161937	0.00126849	CPEB4/CTNNB1/NTRK2/HIPK2/SORL1/PPARGC1A/GPNMB/IL6ST/TMEM259/CHL1/JUN/HYOU1/PRKCI/LGMN/BTG2/GRN/PPT1/ADNP/OXR1/GBE1/MEF2C/EIF4G1/HIF1A/TFAP2B/REST/AP2B1/FOXQ1	27
GO:0060749	BP	GO:0060749	mammary gland alveolus development	7/1057	19/18800	4.83e-05	0.0016302	0.00127697	EGF/ERBB4/VEGFA/PRLR/DDR1/HIF1A/HOXA5	7
GO:0061377	BP	GO:0061377	mammary gland lobule development	7/1057	19/18800	4.83e-05	0.0016302	0.00127697	EGF/ERBB4/VEGFA/PRLR/DDR1/HIF1A/HOXA5	7
GO:0034101	BP	GO:0034101	erythrocyte homeostasis	20/1057	133/18800	5.33e-05	0.00176622	0.00138352	ZFP36L1/VEGFA/HIPK2/HSPA1B/ZFP36/ACVR1B/PRKDC/UFL1/SMAD5/KMT2E/P4HTM/HIF1A/MFHAS1/ADAR/HOXA5/SP3/STAT3/PTBP3/STAT1/HSPA1A	20
GO:0061041	BP	GO:0061041	regulation of wound healing	20/1057	133/18800	5.33e-05	0.00176622	0.00138352	CD9/KNG1/PLAU/ITGB1/OCLN/THBS1/SRSF6/MYLK/SERPING1/TSPAN8/CLDN19/PHLDB2/CLDN4/ANO6/CLDN3/ARFGEF1/TFPI/PDGFA/CASK/VKORC1	20
GO:0030641	BP	GO:0030641	regulation of cellular pH	15/1057	83/18800	5.33e-05	0.00176622	0.00138352	RNASEK/TMEM106B/CLCN3/ATP6AP1/ATP6AP2/CLN5/TMEM9/TMEM165/SLC4A2/ATP6V0A4/SLC4A4/GRN/MAPK1/PPT1/UBE3A	15
GO:0098739	BP	GO:0098739	import across plasma membrane	25/1057	188/18800	5.52e-05	0.00181155	0.00141903	ATP1A1/ATP1B1/SLC12A1/SLC5A3/KCNJ16/SCNN1A/ITGB1/THBS1/WNK4/KCNJ1/ARL6IP1/FOLR1/SLC39A6/KCNJ10/ATP1B2/ACSL1/WNK1/FXYD2/SLC43A2/SLC39A10/SLC7A8/ARL6IP5/SLC1A5/ATP1B3/SLC3A2	25
GO:0050878	BP	GO:0050878	regulation of body fluid levels	41/1057	382/18800	5.54e-05	0.00181155	0.00141903	CD9/KNG1/SCNN1A/ERBB4/PLAU/LMAN1/CD59/THBS1/VEGFA/WNK4/HSD11B2/IL6ST/FZD6/AKAP11/SERPING1/TSPAN8/GAS6/ITGA2/PRLR/WNK1/GNAQ/DDR1/FLNA/MLLT6/VCL/PAM/COPA/AK3/PRKACB/CLDN4/JMJD1C/ANO6/PAPSS2/HIF1A/TFAP2B/MYH9/UGCG/TFPI/AP3B1/PDGFA/VKORC1	41
GO:0061028	BP	GO:0061028	establishment of endothelial barrier	11/1057	48/18800	5.57e-05	0.00181155	0.00141903	VEGFA/RAP2C/PLCB1/VCL/ZDHHC21/AFDN/EZR/TJP1/CLDN3/MARVELD2/RDX	11
GO:0045185	BP	GO:0045185	maintenance of protein location	16/1057	93/18800	5.67e-05	0.00182132	0.00142668	SORL1/SCIN/PKD2/ANK3/VPS13C/HSPA5/VPS13A/SUN1/GOLPH3/FLNA/HNRNPU/GPAA1/SYNE1/OS9/KDELR2/RER1	16
GO:0060993	BP	GO:0060993	kidney morphogenesis	16/1057	93/18800	5.67e-05	0.00182132	0.00142668	ERBB4/CTNNB1/LGR4/VEGFA/WNK4/GPC3/PBX1/PKD2/ZMPSTE24/LAMA5/PAX2/SALL1/TACSTD2/MAGED1/SOX4/STAT1	16
GO:0019079	BP	GO:0019079	viral genome replication	20/1057	134/18800	5.94e-05	0.00189666	0.00148569	HACD3/PPIB/PROX1/PCBP2/NUCKS1/PKN2/GAS6/PCBP1/TASOR/FMR1/BST2/DDB1/NFIA/CTBP1/TOP2B/ADAR/LARP1/ILF3/CDC42/DDX3X	20
GO:0001838	BP	GO:0001838	embryonic epithelial tube formation	19/1057	124/18800	6.26e-05	0.00197572	0.00154762	SFRP1/CTNNB1/SDC4/TMED2/SPINT2/PLXNB2/HECTD1/MIB1/FZD6/FOLR1/SPINT1/PAX2/BRD2/PRKACB/SETD2/ARHGAP35/HIF1A/SOX4/OPA1	19
GO:1903313	BP	GO:1903313	positive regulation of mRNA metabolic process	19/1057	124/18800	6.26e-05	0.00197572	0.00154762	ZFP36L1/CELF1/ZFP36/TNRC6A/TRA2A/TNRC6B/TOB1/YTHDF3/HNRNPU/NUDT21/TRA2B/BTG2/PUM1/SNRNP70/TUT4/CNOT6L/SYNCRIP/TARDBP/ZFP36L2	19
GO:0030324	BP	GO:0030324	lung development	24/1057	179/18800	6.76e-05	0.00212308	0.00166305	CTNNB1/TMEM38B/VEGFA/SRSF6/GPC3/PROX1/SREBF1/MAN2A1/LAMA5/ITGB6/MAN1A2/LTBP3/LIPA/FGF9/SIM2/MAPK1/YAP1/HOXA5/SP3/CDC42/SMAD2/AP3B1/PDGFA/YWHAZ	24
GO:0010970	BP	GO:0010970	transport along microtubule	22/1057	157/18800	6.9e-05	0.00215235	0.00168598	APP/SYNE2/LAMP1/DST/SFPQ/PCM1/SUN1/HNRNPU/PURA/LRPPRC/ARL8B/DYNC1H1/KIF5B/RHOT2/ARMCX3/HIF1A/OPA1/BICDL1/RAB21/CDC42/AP3B1/COPG1	22
GO:0045821	BP	GO:0045821	positive regulation of glycolytic process	7/1057	20/18800	7.06e-05	0.00217845	0.00170642	APP/INSR/PRKAA2/SLC4A4/HIF1A/ZBTB20/PRKAA1	7
GO:1902236	BP	GO:1902236	negative regulation of endoplasmic reticulum stress-induced intrinsic apoptotic signaling pathway	7/1057	20/18800	7.06e-05	0.00217845	0.00170642	TMBIM6/GRINA/SELENOS/HYOU1/HERPUD1/OPA1/HSPA1A	7
GO:0061333	BP	GO:0061333	renal tubule morphogenesis	14/1057	76/18800	7.55e-05	0.00231519	0.00181354	CTNNB1/LGR4/VEGFA/WNK4/GPC3/PBX1/PKD2/LAMA5/PAX2/SALL1/COL4A1/TACSTD2/MEF2C/MAGED1	14
GO:0034332	BP	GO:0034332	adherens junction organization	11/1057	50/18800	8.3e-05	0.00251588	0.00197075	CTNNB1/VEGFA/CDH1/DSP/ADAM10/VCL/HIPK1/TJP1/KIFC3/RDX/CDC42	11
GO:1990573	BP	GO:1990573	potassium ion import across plasma membrane	11/1057	50/18800	8.3e-05	0.00251588	0.00197075	ATP1A1/ATP1B1/SLC12A1/KCNJ16/WNK4/KCNJ1/KCNJ10/ATP1B2/WNK1/FXYD2/ATP1B3	11
GO:0014020	BP	GO:0014020	primary neural tube formation	16/1057	96/18800	8.41e-05	0.00253482	0.00198558	SFRP1/SDC4/TMED2/SPINT2/PLXNB2/HECTD1/FZD6/FOLR1/SPINT1/PAX2/BRD2/PRKACB/SETD2/ARHGAP35/HIF1A/OPA1	16
GO:0043297	BP	GO:0043297	apical junction assembly	14/1057	77/18800	8.76e-05	0.00260988	0.00204438	CLDN16/OCLN/CLDN10/PKN2/VCL/CLDN19/AFDN/CLDN4/TJP1/CLDN3/CLDN7/PDCD6IP/MARVELD2/WDR1	14
GO:0072028	BP	GO:0072028	nephron morphogenesis	14/1057	77/18800	8.76e-05	0.00260988	0.00204438	ERBB4/CTNNB1/LGR4/VEGFA/WNK4/GPC3/PBX1/PKD2/LAMA5/PAX2/SALL1/TACSTD2/MAGED1/STAT1	14
GO:0019882	BP	GO:0019882	antigen processing and presentation	17/1057	107/18800	9.47e-05	0.00280733	0.00219904	CTSD/CALR/LNPEP/THBS1/IFI30/FGL2/CTSL/CTSF/PDIA3/LGMN/HLA-C/ARL8B/HLA-E/SAR1B/HLA-A/AP3B1/HLA-B	17
GO:0030323	BP	GO:0030323	respiratory tube development	24/1057	183/18800	9.63e-05	0.00283731	0.00222252	CTNNB1/TMEM38B/VEGFA/SRSF6/GPC3/PROX1/SREBF1/MAN2A1/LAMA5/ITGB6/MAN1A2/LTBP3/LIPA/FGF9/SIM2/MAPK1/YAP1/HOXA5/SP3/CDC42/SMAD2/AP3B1/PDGFA/YWHAZ	24
GO:0036376	BP	GO:0036376	sodium ion export across plasma membrane	6/1057	15/18800	0.00010044	0.00291333	0.00228207	ATP1A1/ATP1B1/ATP1B2/FXYD2/SLC4A4/ATP1B3	6
GO:0070863	BP	GO:0070863	positive regulation of protein exit from endoplasmic reticulum	6/1057	15/18800	0.00010044	0.00291333	0.00228207	CD81/SORL1/TMEM30A/BCAP31/SAR1A/SAR1B	6
GO:0043268	BP	GO:0043268	positive regulation of potassium ion transport	11/1057	51/18800	0.00010052	0.00291333	0.00228207	ATP1B1/AKAP9/WNK4/ATP1B2/WNK1/FXYD2/ANK2/FLNA/ANO6/KIF5B/ATP1B3	11
GO:0016331	BP	GO:0016331	morphogenesis of embryonic epithelium	21/1057	150/18800	0.00010132	0.00292074	0.00228788	SFRP1/CTNNB1/SDC4/TMED2/SPINT2/PLXNB2/HECTD1/MIB1/FZD6/FOLR1/SPINT1/LAMA5/PAX2/BRD2/PRKACB/SETD2/ARHGAP35/HIF1A/SOX4/EPB41L5/OPA1	21
GO:0043523	BP	GO:0043523	regulation of neuron apoptotic process	26/1057	207/18800	0.00010401	0.00298199	0.00233586	CPEB4/CTNNB1/NTRK2/HIPK2/PPARGC1A/IL6ST/CHL1/LANCL1/JUN/TRIM2/HYOU1/PRKCI/LGMN/BTG2/GRN/PPT1/ADNP/NF1/OXR1/GBE1/MEF2C/HIF1A/TFAP2B/CDC42/ATF2/FOXQ1	26
GO:0071604	BP	GO:0071604	transforming growth factor beta production	10/1057	43/18800	0.00010584	0.00300148	0.00235112	CD46/THBS1/ATP6AP2/ITGAV/ITGB6/LTBP3/LAPTM4B/ITGB8/HIF1A/ATF2	10
GO:0051651	BP	GO:0051651	maintenance of location in cell	27/1057	219/18800	0.00010616	0.00300148	0.00235112	HSP90B1/CALR/AKAP9/TMEM38B/ITPR1/SORL1/SCIN/ITPR2/PKD2/LIME1/ANK3/VPS13C/HSPA5/VPS13A/DIAPH1/ANK2/SUN1/GOLPH3/HNRNPU/GPAA1/SYNE1/MTLN/PRKD1/OS9/KDELR2/PDPK1/RER1	27
GO:0032922	BP	GO:0032922	circadian regulation of gene expression	13/1057	69/18800	0.00010639	0.00300148	0.00235112	PPP1CB/LGR4/PPARGC1A/EGR1/BHLHE40/KMT2A/OGT/HUWE1/HNRNPU/KDM5A/NRIP1/MAGED1/GFPT1	13
GO:0016485	BP	GO:0016485	protein processing	29/1057	243/18800	0.00010751	0.00301703	0.00236331	TMEM59/PLAU/CYFIP2/THBS1/CPD/BACE2/ZMPSTE24/SPCS2/ATP6AP2/CLN5/GLG1/SPPL3/OGT/HPN/ASPH/CTSL/ADAM10/CPM/YME1L1/LGMN/SPCS3/PRKACB/PERP/TMEM208/XIAP/MYH9/OMA1/YIPF5/HM13	29
GO:0048194	BP	GO:0048194	Golgi vesicle budding	5/1057	10/18800	0.00011058	0.00308242	0.00241453	TMED2/TMED10/GOLPH3/PRKCI/TMED9	5
GO:0060284	BP	GO:0060284	regulation of cell development	49/1057	500/18800	0.00011128	0.00308242	0.00241453	SPP1/CALR/NPTN/CXCL12/CTNNB1/RTN4/SEMA6D/PLXNB1/VEGFA/NTRK2/SORL1/ACTN4/OBSL1/PLXNB2/HOXB3/IL6ST/MAN2A1/BHLHE40/PLCB1/SPINT1/TUG1/DICER1/PCM1/MACF1/PRKDC/UFL1/FLNA/IST1/VCL/ZDHHC21/GOLGA4/PRKCI/RYK/P4HB/CARMIL1/GRN/YAP1/ADNP/NF1/TACSTD2/DOCK1/CAPRIN1/HIF1A/NEDD9/CERS2/RAB21/REST/CDC42/METRN	49
GO:0008360	BP	GO:0008360	regulation of cell shape	21/1057	151/18800	0.00011158	0.00308242	0.00241453	PLXNB1/VEGFA/FAM171A1/CDC42SE1/PLXNB2/ZMPSTE24/HPN/MKLN1/DIAPH1/RHOBTB3/PHIP/MYH10/EZR/ARHGAP35/EPB41L3/BRWD1/MYH9/RDX/WDR1/RHOB/RHOQ	21
GO:0051591	BP	GO:0051591	response to cAMP	15/1057	89/18800	0.00012193	0.00335079	0.00262474	APP/BSG/FOS/CYP1B1/ZFP36L1/AKAP9/FOSB/ITPR2/SREBF1/PKD2/HSPA5/SDC1/EZR/BIRC2/STAT1	15
GO:0016052	BP	GO:0016052	carbohydrate catabolic process	21/1057	152/18800	0.00012275	0.00335596	0.00262879	APP/PPP1CB/INSR/PRKAA2/OGDHL/OGT/OGDH/GLB1/AGL/SCARB2/SLC4A4/PFKL/MIOX/HIF1A/ZBTB20/NCOR1/NEU1/STAT3/PRKAA1/CTBS/PGD	21
GO:0061951	BP	GO:0061951	establishment of protein localization to plasma membrane	12/1057	61/18800	0.00012628	0.00343491	0.00269064	ACSL3/SPTBN1/ATP2C1/ATP6AP1/PREPL/ANK3/MACF1/GOLPH3/ZDHHC2/GOLGA4/AFDN/GGA2	12
GO:0051452	BP	GO:0051452	intracellular pH reduction	10/1057	44/18800	0.00013014	0.00350377	0.00274458	RNASEK/TMEM106B/CLCN3/ATP6AP2/CLN5/TMEM9/ATP6V0A4/GRN/PPT1/UBE3A	10
GO:1901381	BP	GO:1901381	positive regulation of potassium ion transmembrane transport	10/1057	44/18800	0.00013014	0.00350377	0.00274458	ATP1B1/AKAP9/WNK4/ATP1B2/WNK1/FXYD2/ANK2/FLNA/ANO6/ATP1B3	10
GO:0019080	BP	GO:0019080	viral gene expression	16/1057	100/18800	0.00013845	0.00364529	0.00285543	CANX/PCBP2/ZFP36/MGAT4A/MAN2A1/NUCKS1/HPN/EIF3A/JUN/SPCS3/RSF1/SP1/SMARCA4/REST/TARDBP/CSNK1A1	16
GO:0001843	BP	GO:0001843	neural tube closure	15/1057	90/18800	0.00013883	0.00364529	0.00285543	SFRP1/SDC4/TMED2/SPINT2/PLXNB2/HECTD1/FZD6/FOLR1/SPINT1/PAX2/BRD2/PRKACB/SETD2/ARHGAP35/OPA1	15
GO:0002028	BP	GO:0002028	regulation of sodium ion transport	15/1057	90/18800	0.00013883	0.00364529	0.00285543	ATP1A1/ATP1B1/WNK4/ACTN4/ANK3/PRSS8/NEDD4L/ATP1B2/WNK1/FXYD2/UTRN/MLLT6/KLHL24/ATP1B3/AHCYL1	15
GO:0046031	BP	GO:0046031	ADP metabolic process	15/1057	90/18800	0.00013883	0.00364529	0.00285543	APP/INSR/PRKAA2/OGDHL/OGT/OGDH/SLC4A4/AK3/PFKL/AK4/HIF1A/ZBTB20/NCOR1/STAT3/PRKAA1	15
GO:0061157	BP	GO:0061157	mRNA destabilization	15/1057	90/18800	0.00013883	0.00364529	0.00285543	ZFP36L1/CELF1/ZFP36/TNRC6A/TNRC6B/TOB1/YTHDF3/HNRNPU/BTG2/PUM1/TUT4/CNOT6L/SYNCRIP/TARDBP/ZFP36L2	15
GO:0031032	BP	GO:0031032	actomyosin structure organization	25/1057	199/18800	0.00013971	0.0036504	0.00285944	SFRP1/SDC4/CGNL1/ITGB1/FAM171A1/CD47/PRKAR1A/OBSL1/PROX1/TRPM7/LIMCH1/ITGB5/MYH10/CARMIL1/PHLDB2/TACSTD2/TJP1/EPB41L3/ARHGAP6/MYH9/PDCD6IP/EPB41L5/CDC42/WDR1/MEF2A	25
GO:0030970	BP	GO:0030970	retrograde protein transport, ER to cytosol	8/1057	29/18800	0.00014455	0.00372763	0.00291993	HSP90B1/BCAP31/SEL1L/SELENOS/OS9/HERPUD1/ERLEC1/HM13	8
GO:1903513	BP	GO:1903513	endoplasmic reticulum to cytosol transport	8/1057	29/18800	0.00014455	0.00372763	0.00291993	HSP90B1/BCAP31/SEL1L/SELENOS/OS9/HERPUD1/ERLEC1/HM13	8
GO:0034599	BP	GO:0034599	cellular response to oxidative stress	32/1057	284/18800	0.00014478	0.00372763	0.00291993	FOS/CTNNB1/CYP1B1/PPARGC1A/HSPA1B/CPEB2/PRKAA2/PKD2/ATP2A2/SFPQ/ERMP1/LANCL1/JUN/SELENOS/PAX2/SETX/P4HB/MAPK1/ARL6IP5/NFE2L1/DAPK1/OXR1/PRKD1/SOD3/HIF1A/PAWR/PRKAA1/TBC1D24/REST/ATF2/RHOB/HSPA1A	32
GO:0048592	BP	GO:0048592	eye morphogenesis	21/1057	154/18800	0.00014809	0.00379448	0.0029723	CTNNB1/VEGFA/NTRK2/HIPK2/JAG1/OBSL1/PROX1/MAN2A1/FAT1/TUG1/TSPAN12/PRKCI/PAX2/HIPK1/NIPBL/NF1/HIF1A/TFAP2B/SP3/ABI2/STAT3	21
GO:2000651	BP	GO:2000651	positive regulation of sodium ion transmembrane transporter activity	6/1057	16/18800	0.00015307	0.00389035	0.00304739	ATP1B1/WNK4/ACTN4/ANK3/WNK1/FXYD2	6
GO:1901653	BP	GO:1901653	cellular response to peptide	38/1057	361/18800	0.0001533	0.00389035	0.00304739	APP/CYP1B1/INSR/ZFP36L1/TBC1D4/CASR/GCGR/LPL/SORL1/CPEB2/SREBF1/PTPRA/NUCKS1/PLCB1/ATP2B1/OGT/IGF1R/PRKDC/GDF15/C2CD5/SELENOS/PRKCI/LGMN/YWHAG/PHIP/KL/RARRES2/SP1/AHCYL1/STAT3/PRKAA1/STXBP4/LEPROT/PDPK1/STAT1/PIK3C2A/RHOQ/EIF4EBP2	38
GO:0001667	BP	GO:0001667	ameboidal-type cell migration	47/1057	480/18800	0.00015558	0.00392953	0.00307808	EGF/ERBB4/CALR/SDC4/CYP1B1/RTN4/SEMA6D/ITGB1/THBS1/VEGFA/GPC3/PTPRG/PROX1/TNS1/IQGAP1/PRCP/NR2F2/FOLR1/ACVR1B/PKN2/ITGA2/LAMA5/MACF1/FOXP1/JUN/AMOTL2/YTHDF3/JUP/EMC10/LGMN/KITLG/GRN/NF1/TACSTD2/DOCK1/PRKD1/MEF2C/RIN2/SP1/HIF1A/ZFAND5/MYH9/EPB41L5/CDC42/PDPK1/PIK3C2A/RHOB	47
GO:0060606	BP	GO:0060606	tube closure	15/1057	91/18800	0.00015773	0.00394019	0.00308644	SFRP1/SDC4/TMED2/SPINT2/PLXNB2/HECTD1/FZD6/FOLR1/SPINT1/PAX2/BRD2/PRKACB/SETD2/ARHGAP35/OPA1	15
GO:0097306	BP	GO:0097306	cellular response to alcohol	15/1057	91/18800	0.00015773	0.00394019	0.00308644	SFRP1/CTNNB1/CYP1B1/ITPR2/PRKAA2/CDH1/LRP6/ATP2B1/IGF1R/GOLPH3/JUP/KLF9/XRN1/LARP1/PRKAA1	15
GO:0071453	BP	GO:0071453	cellular response to oxygen levels	22/1057	166/18800	0.00015874	0.00394019	0.00308644	MALAT1/SFRP1/CPEB4/TMBIM6/ZFP36L1/ATP6V1A/CASR/VEGFA/MDM4/HIPK2/CPEB2/EGR1/ATP6AP1/NPEPPS/HYOU1/DDAH1/P4HB/AK4/HIF1A/PRKAA1/NDRG1/ATF2	22
GO:0006110	BP	GO:0006110	regulation of glycolytic process	10/1057	45/18800	0.00015897	0.00394019	0.00308644	APP/INSR/PRKAA2/OGT/SLC4A4/HIF1A/ZBTB20/NCOR1/STAT3/PRKAA1	10
GO:0003158	BP	GO:0003158	endothelium development	19/1057	133/18800	0.0001629	0.00401872	0.00314795	CTNNB1/COL18A1/VEGFA/JAG1/PROX1/NR2F2/RAP2C/PLCB1/FOXP1/VCL/ZDHHC21/AFDN/EZR/TJP1/CLDN3/VEZF1/MARVELD2/RDX/RHOB	19
GO:0051893	BP	GO:0051893	regulation of focal adhesion assembly	12/1057	63/18800	0.0001744	0.00426264	0.00333902	SFRP1/SDC4/THBS1/VEGFA/PTPRA/SLK/MACF1/LIMCH1/VCL/PHLDB2/ARHGAP6/EPB41L5	12
GO:0090109	BP	GO:0090109	regulation of cell-substrate junction assembly	12/1057	63/18800	0.0001744	0.00426264	0.00333902	SFRP1/SDC4/THBS1/VEGFA/PTPRA/SLK/MACF1/LIMCH1/VCL/PHLDB2/ARHGAP6/EPB41L5	12
GO:0007044	BP	GO:0007044	cell-substrate junction assembly	15/1057	92/18800	0.00017882	0.00434838	0.00340618	SFRP1/SDC4/THBS1/VEGFA/PTPRA/DST/ITGA6/SLK/ITGA2/MACF1/LIMCH1/VCL/PHLDB2/ARHGAP6/EPB41L5	15
GO:0014074	BP	GO:0014074	response to purine-containing compound	19/1057	134/18800	0.00018001	0.00434838	0.00340618	APP/HSP90B1/BSG/FOS/CYP1B1/ZFP36L1/AKAP9/TMEM38B/FOSB/ITPR2/SREBF1/PKD2/HSPA5/SDC1/EZR/XRN1/BIRC2/PRKAA1/STAT1	19
GO:0043524	BP	GO:0043524	negative regulation of neuron apoptotic process	20/1057	145/18800	0.00018036	0.00434838	0.00340618	CPEB4/NTRK2/HIPK2/PPARGC1A/IL6ST/CHL1/JUN/HYOU1/PRKCI/LGMN/BTG2/GRN/PPT1/ADNP/OXR1/GBE1/MEF2C/HIF1A/TFAP2B/FOXQ1	20
GO:1901214	BP	GO:1901214	regulation of neuron death	34/1057	313/18800	0.000185	0.00443992	0.00347788	CPEB4/FOS/CTNNB1/NTRK2/HIPK2/SORL1/PPARGC1A/EGR1/GPNMB/IL6ST/TMEM259/CHL1/LANCL1/JUN/TRIM2/HYOU1/PRKCI/LGMN/BTG2/GRN/PPT1/ADNP/NF1/OXR1/GBE1/MEF2C/EIF4G1/HIF1A/TFAP2B/REST/CDC42/AP2B1/ATF2/FOXQ1	34
GO:1905668	BP	GO:1905668	positive regulation of protein localization to endosome	5/1057	11/18800	0.00019334	0.00461916	0.00361829	EGF/SORL1/EZR/ABHD17C/RDX	5
GO:0072594	BP	GO:0072594	establishment of protein localization to organelle	43/1057	431/18800	0.00019455	0.00462735	0.00362471	MAN1A1/LMAN1/SORL1/LAMP1/SREBF1/CDH1/SPCS2/BCAP31/PTTG1IP/TRAM1/RANBP2/VPS13C/HSPA5/LAMP2/VPS13A/NPEPPS/SORT1/FLNA/JUP/HUWE1/SEC63/SCARB2/SPCS3/FGF9/RAB3GAP1/NUP58/NIPBL/NF1/M6PR/ZFYVE16/PRKD1/HERPUD1/TNPO1/GCC2/ELAVL1/SEC62/STAT3/IPO7/PRKAA1/LEPROT/AP3B1/ATF2/TARDBP	43
GO:0009135	BP	GO:0009135	purine nucleoside diphosphate metabolic process	16/1057	103/18800	0.00019725	0.00464989	0.00364236	APP/INSR/PRKAA2/OGDHL/OGT/OGDH/SLC4A4/AK3/PFKL/AK4/HIF1A/ZBTB20/NCOR1/STAT3/PRKAA1/CASK	16
GO:0009179	BP	GO:0009179	purine ribonucleoside diphosphate metabolic process	16/1057	103/18800	0.00019725	0.00464989	0.00364236	APP/INSR/PRKAA2/OGDHL/OGT/OGDH/SLC4A4/AK3/PFKL/AK4/HIF1A/ZBTB20/NCOR1/STAT3/PRKAA1/CASK	16
GO:0006885	BP	GO:0006885	regulation of pH	15/1057	93/18800	0.00020231	0.00474813	0.00371931	RNASEK/TMEM106B/CLCN3/ATP6AP1/ATP6AP2/CLN5/TMEM9/TMEM165/SLC4A2/ATP6V0A4/SLC4A4/GRN/MAPK1/PPT1/UBE3A	15
GO:0043488	BP	GO:0043488	regulation of mRNA stability	21/1057	158/18800	0.00021297	0.00497621	0.00389797	ZFP36L1/CELF1/ZFP36/TNRC6A/TNRC6B/TOB1/MYEF2/YTHDF3/FMR1/HNRNPU/PUM2/BTG2/PUM1/FUS/ELAVL1/LARP1/TUT4/CNOT6L/SYNCRIP/TARDBP/ZFP36L2	21
GO:0001890	BP	GO:0001890	placenta development	20/1057	147/18800	0.00021751	0.00506001	0.00396361	SPP1/BSG/TMED2/ZFP36L1/JUNB/SPINT2/PKD2/HECTD1/BIRC6/NR2F2/SPINT1/ASH1L/BPTF/MAPK1/SETD2/CTSB/ITGB8/HIF1A/BIRC2/SP3	20
GO:0072088	BP	GO:0072088	nephron epithelium morphogenesis	13/1057	74/18800	0.00022204	0.00514291	0.00402855	CTNNB1/LGR4/VEGFA/WNK4/GPC3/PBX1/PKD2/LAMA5/PAX2/SALL1/TACSTD2/MAGED1/STAT1	13
GO:0048638	BP	GO:0048638	regulation of developmental growth	35/1057	329/18800	0.00022437	0.00515175	0.00403548	APP/SPP1/ERBB4/CXCL12/RTN4/SEMA6D/INSR/VEGFA/PPIB/FGFR3/PROX1/ZMPSTE24/NPY1R/AGRN/PLCB1/NEDD4L/MACF1/GDF15/IST1/GOLGA4/LGMN/FGF9/RYK/TNKS2/YAP1/NIPBL/ADNP/EZR/MEF2C/STAT3/RAB21/WWC1/DPYSL2/SPAG9/WWC2	35
GO:0043487	BP	GO:0043487	regulation of RNA stability	22/1057	170/18800	0.00022444	0.00515175	0.00403548	ZFP36L1/CELF1/ZFP36/TNRC6A/TNRC6B/TOB1/MYEF2/YTHDF3/FMR1/HNRNPU/PUM2/BTG2/TENT2/PUM1/FUS/ELAVL1/LARP1/TUT4/CNOT6L/SYNCRIP/TARDBP/ZFP36L2	22
GO:0090136	BP	GO:0090136	epithelial cell-cell adhesion	6/1057	17/18800	0.00022534	0.00515175	0.00403548	CYP1B1/DSP/JUP/VCL/ITGB5/KIFC3	6
GO:0007178	BP	GO:0007178	transmembrane receptor protein serine/threonine kinase signaling pathway	38/1057	368/18800	0.00022659	0.00515572	0.00403859	SFRP1/FOS/CRIM1/SPTBN1/LNPEP/THBS1/HIPK2/SORL1/GPC3/EGR1/GLG1/FOLR1/ACVR1B/HSPA5/SLC33A1/TOB1/ITGB6/ZMIZ1/GDF15/JUN/SOSTDC1/LTBP3/FGF9/ITGB5/SMAD5/USP9X/ZNF451/PEG10/TRIM33/ITGB8/XIAP/TFAP2B/STAT3/PPM1A/SMAD2/PDPK1/ATF2/HSPA1A	38
GO:0050779	BP	GO:0050779	RNA destabilization	15/1057	94/18800	0.00022843	0.00515572	0.00403859	ZFP36L1/CELF1/ZFP36/TNRC6A/TNRC6B/TOB1/YTHDF3/HNRNPU/BTG2/PUM1/TUT4/CNOT6L/SYNCRIP/TARDBP/ZFP36L2	15
GO:0061014	BP	GO:0061014	positive regulation of mRNA catabolic process	15/1057	94/18800	0.00022843	0.00515572	0.00403859	ZFP36L1/CELF1/ZFP36/TNRC6A/TNRC6B/TOB1/YTHDF3/HNRNPU/BTG2/PUM1/TUT4/CNOT6L/SYNCRIP/TARDBP/ZFP36L2	15
GO:0032570	BP	GO:0032570	response to progesterone	9/1057	39/18800	0.00024873	0.00555597	0.00435211	FOS/CYP1B1/THBS1/FOSB/SREBF1/IGF1R/YAP1/CLDN4/UBE3A	9
GO:0071634	BP	GO:0071634	regulation of transforming growth factor beta production	9/1057	39/18800	0.00024873	0.00555597	0.00435211	CD46/THBS1/ATP6AP2/ITGAV/ITGB6/LAPTM4B/ITGB8/HIF1A/ATF2	9
GO:0006417	BP	GO:0006417	regulation of translation	45/1057	463/18800	0.00025136	0.00555597	0.00435211	APP/CPEB4/CALR/CYP1B1/TMED2/ZFP36L1/THBS1/CELF1/CPEB2/ERBB2/PLXNB2/ZFP36/TIA1/TNRC6A/TNRC6B/ITGA2/TOB1/PRKDC/YTHDF3/FMR1/HNRNPU/PURA/DNAJC3/PUM2/BTG2/PUM1/LRPPRC/LARP4/DAPK1/XRN1/CAPRIN1/UHMK1/EIF4G1/QKI/ELAVL1/LARP1/SOX4/TUT4/CNOT6L/ILF3/SYNCRIP/DDX3X/TARDBP/ZFP36L2/EIF4EBP2	45
GO:0051235	BP	GO:0051235	maintenance of location	35/1057	331/18800	0.00025193	0.00555597	0.00435211	HSP90B1/CALR/AKAP9/TMEM38B/ITPR1/LPL/SORL1/SCIN/ITPR2/SREBF1/PKD2/LIME1/ANK3/ITGAV/VPS13C/HSPA5/VPS13A/DIAPH1/PLIN5/ANK2/SUN1/GOLPH3/FLNA/HNRNPU/GPAA1/SYNE1/MTLN/PRKD1/NRIP1/OS9/BSCL2/KDELR2/PNPLA2/PDPK1/RER1	35
GO:0006109	BP	GO:0006109	regulation of carbohydrate metabolic process	23/1057	183/18800	0.00025237	0.00555597	0.00435211	EGF/APP/PPP1CB/INSR/GCGR/PPARGC1A/CLTC/PRKAA2/ZMPSTE24/RANBP2/OGT/PTH1R/SELENOS/SCARB2/SLC4A4/DDB1/EPM2AIP1/FAM3C/HIF1A/ZBTB20/NCOR1/STAT3/PRKAA1	23
GO:0002262	BP	GO:0002262	myeloid cell homeostasis	21/1057	160/18800	0.00025393	0.00555597	0.00435211	ZFP36L1/VEGFA/HIPK2/HSPA1B/ZFP36/ACVR1B/PRKDC/UFL1/KITLG/SMAD5/KMT2E/P4HTM/HIF1A/MFHAS1/ADAR/HOXA5/SP3/STAT3/PTBP3/STAT1/HSPA1A	21
GO:1901379	BP	GO:1901379	regulation of potassium ion transmembrane transport	15/1057	95/18800	0.00025741	0.00555597	0.00435211	ATP1B1/AKAP9/ITGB1/WNK4/ANK3/NEDD4L/ATP1B2/WNK1/FXYD2/ANK2/FLNA/CD63/KLHL24/ANO6/ATP1B3	15
GO:0007035	BP	GO:0007035	vacuolar acidification	7/1057	24/18800	0.00025873	0.00555597	0.00435211	TMEM106B/ATP6AP2/CLN5/TMEM9/ATP6V0A4/GRN/PPT1	7
GO:0021801	BP	GO:0021801	cerebral cortex radial glia-guided migration	7/1057	24/18800	0.00025873	0.00555597	0.00435211	CTNNB1/RTN4/SYNE2/ADGRG1/LAMB1/ZMIZ1/SUN1	7
GO:0022030	BP	GO:0022030	telencephalon glial cell migration	7/1057	24/18800	0.00025873	0.00555597	0.00435211	CTNNB1/RTN4/SYNE2/ADGRG1/LAMB1/ZMIZ1/SUN1	7
GO:0036010	BP	GO:0036010	protein localization to endosome	7/1057	24/18800	0.00025873	0.00555597	0.00435211	EGF/SORL1/TMEM30A/AKAP11/EZR/ABHD17C/RDX	7
GO:0072202	BP	GO:0072202	cell differentiation involved in metanephros development	7/1057	24/18800	0.00025873	0.00555597	0.00435211	CTNNB1/LGR4/POU3F3/PAX2/SALL1/YAP1/STAT1	7
GO:0072384	BP	GO:0072384	organelle transport along microtubule	14/1057	85/18800	0.00026075	0.00557675	0.00436839	SYNE2/LAMP1/SUN1/LRPPRC/DYNC1H1/KIF5B/RHOT2/ARMCX3/HIF1A/OPA1/BICDL1/CDC42/AP3B1/COPG1	14
GO:0062197	BP	GO:0062197	cellular response to chemical stress	35/1057	332/18800	0.00026682	0.00568353	0.00445203	FOS/CTNNB1/CYP1B1/ZFP36L1/PPARGC1A/HSPA1B/CPEB2/PRKAA2/MYLK/PKD2/ATP2A2/SFPQ/ERMP1/LANCL1/JUN/SELENOS/PAX2/SETX/P4HB/MAPK1/ARL6IP5/NFE2L1/DAPK1/OXR1/PRKD1/SOD3/HIF1A/PAWR/PRKAA1/TBC1D24/REST/DDX3X/ATF2/RHOB/HSPA1A	35
GO:0062207	BP	GO:0062207	regulation of pattern recognition receptor signaling pathway	16/1057	106/18800	0.00027663	0.00586902	0.00459733	RTN4/LGR4/HSPA1B/TSPAN6/ERBIN/PUM2/PUM1/ANKRD17/PJA2/MFHAS1/XIAP/BIRC2/RIOK3/PDPK1/DDX3X/HSPA1A	16
GO:0030100	BP	GO:0030100	regulation of endocytosis	25/1057	208/18800	0.00027988	0.00591428	0.00463279	EGF/INSR/PROM2/VEGFA/GPC3/MIB1/SGIP1/ITGAV/NEDD4L/ITGA2/MKLN1/HIP1/FMR1/ATAD1/CD63/HIP1R/LRPAP1/PPT1/ANO6/ZFYVE16/CD151/PRKD1/RAB21/CDC42/AP2B1	25
GO:0009991	BP	GO:0009991	response to extracellular stimulus	46/1057	479/18800	0.00028231	0.00594195	0.00465446	SPP1/SFRP1/CPEB4/FOS/CYP1B1/CASR/IGFBP2/GCGR/LPL/SORL1/PPARGC1A/PROX1/PRKAA2/HSD11B2/ZFP36/SREBF1/SGIP1/TNRC6A/ATP2B1/FOLR1/SHANK2/HSPA5/OGT/LAMP2/GAS6/ITGA2/ACSL1/TBL1XR1/IGF1R/GDF15/SLC38A2/AGL/PAX2/MAPK1/ADNP/TLE5/KL/PRKD1/USP33/ARHGAP35/EIF4G1/LARP1/PRKAA1/OMA1/STAT1/ATF2	46
GO:0010976	BP	GO:0010976	positive regulation of neuron projection development	20/1057	150/18800	0.00028581	0.00597059	0.00467689	NPTN/CREB3L2/TMEM106B/NTRK2/KIDINS220/PLXNB2/TMEM30A/ITGA6/HSPA5/ATP1B2/IGF1R/FLNA/PRKCI/SCARB2/SETX/GRN/ADNP/PRKD1/ARHGAP35/CAPRIN1	20
GO:0001658	BP	GO:0001658	branching involved in ureteric bud morphogenesis	11/1057	57/18800	0.00028592	0.00597059	0.00467689	CTNNB1/LGR4/VEGFA/GPC3/PBX1/PKD2/LAMA5/PAX2/SALL1/TACSTD2/MAGED1	11
GO:0045446	BP	GO:0045446	endothelial cell differentiation	17/1057	117/18800	0.00028794	0.00598909	0.00469139	CTNNB1/COL18A1/VEGFA/JAG1/PROX1/NR2F2/RAP2C/PLCB1/VCL/ZDHHC21/AFDN/EZR/TJP1/CLDN3/VEZF1/MARVELD2/RDX	17
GO:0006402	BP	GO:0006402	mRNA catabolic process	27/1057	233/18800	0.00029615	0.00611153	0.00478729	ZFP36L1/CELF1/HSPA1B/SMG1/ZFP36/TNRC6A/TNRC6B/TOB1/MYEF2/YTHDF3/FMR1/HNRNPU/PUM2/BTG2/TENT2/PUM1/XRN1/SMG7/FUS/ELAVL1/LARP1/TUT4/CNOT6L/SYNCRIP/TARDBP/ZFP36L2/HSPA1A	27
GO:0000377	BP	GO:0000377	RNA splicing, via transesterification reactions with bulged adenosine as nucleophile	34/1057	321/18800	0.00029728	0.00611153	0.00478729	HNRNPH1/DDX17/SRSF6/CELF1/RBM6/TIA1/RBM25/RNPC3/SFPQ/WTAP/TRA2A/LUC7L3/SF1/FMR1/HNRNPU/SETX/TRA2B/RBM5/SCAF11/SF3B1/DYRK1A/SNRNP70/PRPF4B/PTBP2/MBNL1/SRRM2/PRPF8/YTHDC1/QKI/MBNL2/SYNCRIP/REST/PNN/LUC7L2	34
GO:0000398	BP	GO:0000398	mRNA splicing, via spliceosome	34/1057	321/18800	0.00029728	0.00611153	0.00478729	HNRNPH1/DDX17/SRSF6/CELF1/RBM6/TIA1/RBM25/RNPC3/SFPQ/WTAP/TRA2A/LUC7L3/SF1/FMR1/HNRNPU/SETX/TRA2B/RBM5/SCAF11/SF3B1/DYRK1A/SNRNP70/PRPF4B/PTBP2/MBNL1/SRRM2/PRPF8/YTHDC1/QKI/MBNL2/SYNCRIP/REST/PNN/LUC7L2	34
GO:0030705	BP	GO:0030705	cytoskeleton-dependent intracellular transport	24/1057	197/18800	0.0003002	0.00614775	0.00481566	APP/SYNE2/ACTN4/LAMP1/DST/SFPQ/MYO6/PCM1/SUN1/HNRNPU/PURA/LRPPRC/ARL8B/DYNC1H1/KIF5B/RHOT2/ARMCX3/HIF1A/OPA1/BICDL1/RAB21/CDC42/AP3B1/COPG1	24
GO:0051642	BP	GO:0051642	centrosome localization	8/1057	32/18800	0.00030479	0.00615313	0.00481988	AKAP9/SYNE2/PKHD1/RANBP2/SUN1/KIF5B/EZR/DYNC1LI2	8
GO:1902235	BP	GO:1902235	regulation of endoplasmic reticulum stress-induced intrinsic apoptotic signaling pathway	8/1057	32/18800	0.00030479	0.00615313	0.00481988	TMBIM6/GRINA/SERINC3/SELENOS/HYOU1/HERPUD1/OPA1/HSPA1A	8
GO:0043001	BP	GO:0043001	Golgi to plasma membrane protein transport	9/1057	40/18800	0.0003051	0.00615313	0.00481988	ACSL3/SPTBN1/ATP2C1/PREPL/ANK3/MACF1/GOLPH3/GOLGA4/GGA2	9
GO:0097009	BP	GO:0097009	energy homeostasis	9/1057	40/18800	0.0003051	0.00615313	0.00481988	PPARGC1A/PRKAA2/PRCP/SGIP1/METRNL/EIF4G1/STAT3/PRKAA1/OMA1	9
GO:0036294	BP	GO:0036294	cellular response to decreased oxygen levels	20/1057	151/18800	0.00031241	0.00627656	0.00491656	MALAT1/SFRP1/CPEB4/TMBIM6/ZFP36L1/CASR/VEGFA/MDM4/HIPK2/CPEB2/EGR1/NPEPPS/HYOU1/DDAH1/P4HB/AK4/HIF1A/PRKAA1/NDRG1/ATF2	20
GO:0006465	BP	GO:0006465	signal peptide processing	5/1057	12/18800	0.0003161	0.00630304	0.00493731	SPCS2/CLN5/SPPL3/SPCS3/HM13	5
GO:1905666	BP	GO:1905666	regulation of protein localization to endosome	5/1057	12/18800	0.0003161	0.00630304	0.00493731	EGF/SORL1/EZR/ABHD17C/RDX	5
GO:0048268	BP	GO:0048268	clathrin coat assembly	6/1057	18/18800	0.000322	0.00634896	0.00497328	CLTC/SGIP1/HIP1/HIP1R/PIK3C2A/AP2B1	6
GO:0071786	BP	GO:0071786	endoplasmic reticulum tubular network organization	6/1057	18/18800	0.000322	0.00634896	0.00497328	RTN4/ARL6IP1/RTN3/TMEM33/ATL2/RAB3GAP1	6
GO:0072234	BP	GO:0072234	metanephric nephron tubule development	6/1057	18/18800	0.000322	0.00634896	0.00497328	LGR4/PKD2/POU3F3/PAX2/YAP1/STAT1	6
GO:0051453	BP	GO:0051453	regulation of intracellular pH	13/1057	77/18800	0.00033355	0.00654466	0.00512658	RNASEK/TMEM106B/CLCN3/ATP6AP2/CLN5/TMEM9/TMEM165/SLC4A2/ATP6V0A4/SLC4A4/GRN/PPT1/UBE3A	13
GO:0001892	BP	GO:0001892	embryonic placenta development	14/1057	87/18800	0.00033439	0.00654466	0.00512658	TMED2/ZFP36L1/JUNB/SPINT2/PKD2/HECTD1/BIRC6/NR2F2/SPINT1/BPTF/MAPK1/SETD2/HIF1A/SP3	14
GO:0006694	BP	GO:0006694	steroid biosynthetic process	22/1057	175/18800	0.00033942	0.00661873	0.00518459	ATP1A1/IGFBP7/PBX1/PROX1/EGR1/PRKAA2/SREBF1/ABCD3/OSBPL3/PRLR/SF1/IGF1R/HMGCR/ERLIN2/LBR/CYB5R3/ASAH1/CYP51A1/HSD17B12/MBTPS1/PRKAA1/REST	22
GO:0061448	BP	GO:0061448	connective tissue development	29/1057	260/18800	0.00034461	0.00669524	0.00524452	CTNNB1/CREB3L2/CASR/SORL1/PPARGC1A/SCIN/FGFR3/EGR1/ARRDC3/HOXB3/ZMPSTE24/GLG1/TBL1XR1/PTH1R/PBXIP1/SOX6/MBOAT2/LTBP3/FGF9/SLC39A13/TRIP11/SMAD5/MAF/ITGB8/MEF2C/HIF1A/HOXA5/ATF2/DDRGK1	29
GO:0045727	BP	GO:0045727	positive regulation of translation	19/1057	141/18800	0.00035042	0.00678336	0.00531355	CYP1B1/THBS1/ERBB2/PLXNB2/ITGA2/TOB1/PRKDC/YTHDF3/FMR1/HNRNPU/DNAJC3/LARP4/UHMK1/EIF4G1/ELAVL1/LARP1/SOX4/SYNCRIP/DDX3X	19
GO:0009895	BP	GO:0009895	negative regulation of catabolic process	34/1057	324/18800	0.00035301	0.0067909	0.00531946	CST3/MDM4/HIPK2/SORL1/SMG1/ZFP36/NELL1/OGT/TOB1/PLIN5/HMGCR/SEC22B/FMR1/FLNA/HNRNPU/WDR6/TENT2/LRPPRC/SNRNP70/CTSA/LAPTM4B/CYP51A1/BSCL2/EIF4G1/NCOR1/FUS/ELAVL1/STAT3/LARP1/PRKAA1/WAC/SYNCRIP/TARDBP/DDRGK1	34
GO:0017148	BP	GO:0017148	negative regulation of translation	28/1057	248/18800	0.0003549	0.0067909	0.00531946	CPEB4/CALR/ZFP36L1/CELF1/CPEB2/ZFP36/TIA1/TNRC6A/TNRC6B/TOB1/YTHDF3/FMR1/HNRNPU/PURA/BTG2/PUM1/DAPK1/XRN1/CAPRIN1/LARP1/TUT4/CNOT6L/ILF3/SYNCRIP/DDX3X/TARDBP/ZFP36L2/EIF4EBP2	28
GO:0016049	BP	GO:0016049	cell growth	46/1057	484/18800	0.0003554	0.0067909	0.00531946	APP/SPP1/SFRP1/CXCL12/CTNNB1/IGFBP7/RTN4/SEMA6D/ITGB1/CYFIP2/VEGFA/KIAA1109/HSPA1B/ERBB2/IQGAP1/TEAD1/SMARCA2/CLSTN1/ACVR1B/PAPPA2/NEDD4L/HPN/MACF1/DDR1/ADAM10/IST1/VCL/BST2/GOLGA4/RYK/YAP1/PPT1/ADNP/USP9X/EPB41L3/EIF4G1/JADE1/SMARCA4/PPP2R1A/EPB41L5/RAB21/CDC42/DDX3X/DPYSL2/SPAG9/HSPA1A	46
GO:0010959	BP	GO:0010959	regulation of metal ion transport	40/1057	403/18800	0.00035593	0.0067909	0.00531946	ATP1A1/ATP1B1/EGF/TMBIM6/CXCL12/CTNNB1/AKAP9/ITGB1/TMEM38B/CASR/WNK4/ACTN4/MYLK/PKD2/LIME1/ANK3/PRSS8/ATP2B1/NEDD4L/ATP1B2/WNK1/FXYD2/UTRN/AHNAK/DIAPH1/VMP1/ANK2/FMR1/FLNA/MLLT6/CD63/KLHL24/ANO6/KIF5B/PRKD1/ATP1B3/SARAF/AHCYL1/PDPK1/CASK	40
GO:0150115	BP	GO:0150115	cell-substrate junction organization	15/1057	98/18800	0.00036413	0.00692236	0.00542243	SFRP1/SDC4/THBS1/VEGFA/PTPRA/DST/ITGA6/SLK/ITGA2/MACF1/LIMCH1/VCL/PHLDB2/ARHGAP6/EPB41L5	15
GO:0150116	BP	GO:0150116	regulation of cell-substrate junction organization	12/1057	68/18800	0.00036745	0.00696049	0.0054523	SFRP1/SDC4/THBS1/VEGFA/PTPRA/SLK/MACF1/LIMCH1/VCL/PHLDB2/ARHGAP6/EPB41L5	12
GO:0046777	BP	GO:0046777	protein autophosphorylation	26/1057	224/18800	0.00037037	0.00699087	0.0054761	ERBB4/INSR/VEGFA/NTRK2/FGFR3/ERBB2/SMG1/CLK1/GPNMB/RAP2C/ACVR1B/SLK/IGF1R/DDR1/CLK4/TRPM7/JUN/TAOK1/DYRK1A/CDK12/DAPK1/PRKD1/UHMK1/PDPK1/DDX3X/PDGFA	26
GO:0000375	BP	GO:0000375	RNA splicing, via transesterification reactions	34/1057	325/18800	0.00037355	0.00702219	0.00550064	HNRNPH1/DDX17/SRSF6/CELF1/RBM6/TIA1/RBM25/RNPC3/SFPQ/WTAP/TRA2A/LUC7L3/SF1/FMR1/HNRNPU/SETX/TRA2B/RBM5/SCAF11/SF3B1/DYRK1A/SNRNP70/PRPF4B/PTBP2/MBNL1/SRRM2/PRPF8/YTHDC1/QKI/MBNL2/SYNCRIP/REST/PNN/LUC7L2	34
GO:0006457	BP	GO:0006457	protein folding	25/1057	212/18800	0.00037468	0.00702219	0.00550064	CANX/HSP90B1/CALR/LMAN1/PPIB/HSPA1B/PDIA6/NKTR/RANBP2/SIL1/HSPA5/DNAJC10/CCDC47/PDIA4/SELENOF/PDIA3/DNAJC3/PPIC/P4HB/GRN/SNRNP70/MESD/DNAJB14/CRTAP/HSPA1A	25
GO:0010975	BP	GO:0010975	regulation of neuron projection development	42/1057	431/18800	0.00037737	0.00702434	0.00550232	SPP1/SFRP1/NPTN/CXCL12/RTN4/SEMA6D/PLXNB1/CREB3L2/TMEM106B/VEGFA/NTRK2/PTPRG/KIDINS220/OBSL1/PLXNB2/TMEM30A/ITGA6/HSPA5/NEDD4L/ATP1B2/MACF1/IGF1R/FLNA/IST1/GOLGA4/PRKCI/SCARB2/SETX/ITM2C/RYK/GRN/ADNP/SDC2/PRKD1/NR2F1/ARHGAP35/CAPRIN1/UBE3A/CERS2/ABI2/RAB21/METRN	42
GO:0007029	BP	GO:0007029	endoplasmic reticulum organization	14/1057	88/18800	0.00037744	0.00702434	0.00550232	LMAN1/RTN4/TMED2/TMEM38B/TRAM1/ARL6IP1/RTN3/TMEM33/CCDC47/ATL2/EMC10/RAB3GAP1/REEP5/SEC31A	14
GO:0008088	BP	GO:0008088	axo-dendritic transport	13/1057	78/18800	0.00038	0.00704733	0.00552032	APP/DST/SFPQ/HNRNPU/PURA/ARL8B/DYNC1H1/KIF5B/ARMCX3/HIF1A/OPA1/RAB21/AP3B1	13
GO:0021799	BP	GO:0021799	cerebral cortex radially oriented cell migration	8/1057	33/18800	0.00038268	0.00704763	0.00552056	CTNNB1/RTN4/SYNE2/ADGRG1/POU3F3/LAMB1/ZMIZ1/SUN1	8
GO:0061842	BP	GO:0061842	microtubule organizing center localization	8/1057	33/18800	0.00038268	0.00704763	0.00552056	AKAP9/SYNE2/PKHD1/RANBP2/SUN1/KIF5B/EZR/DYNC1LI2	8
GO:0032956	BP	GO:0032956	regulation of actin cytoskeleton organization	36/1057	352/18800	0.00039318	0.00721595	0.0056524	SFRP1/CXCL12/SDC4/CGNL1/SPTBN1/CYFIP2/CD47/SCIN/PROX1/IQGAP1/NCKAP1/PLEKHH2/LIMCH1/SPTAN1/FLNA/TAOK1/RHOBTB3/BST2/HIP1R/PAM/RICTOR/ADD3/CARMIL1/PHLDB2/TACSTD2/TJP1/ARHGAP35/ARHGAP6/ABI2/ARFGEF1/RDX/CDC42/WDR1/PDGFA/RHOB/RHOQ	36
GO:0072666	BP	GO:0072666	establishment of protein localization to vacuole	10/1057	50/18800	0.00039654	0.00725255	0.00568108	SORL1/VPS13C/LAMP2/VPS13A/SORT1/SCARB2/M6PR/ZFYVE16/GCC2/AP3B1	10
GO:0034764	BP	GO:0034764	positive regulation of transmembrane transport	25/1057	213/18800	0.00040239	0.00733428	0.0057451	ATP1B1/INSR/AKAP9/ITGB1/OCLN/WNK4/GPC3/ACTN4/PKD2/ANK3/ARL6IP1/ATP1B2/ACSL1/WNK1/FXYD2/VMP1/C2CD5/ANK2/FLNA/PRKCI/ANO6/ATP1B3/PDPK1/MEF2A/RHOQ	25
GO:0006165	BP	GO:0006165	nucleoside diphosphate phosphorylation	15/1057	99/18800	0.00040726	0.00739764	0.00579473	APP/INSR/PRKAA2/NME3/OGDHL/OGT/OGDH/SLC4A4/PFKL/AK4/HIF1A/ZBTB20/NCOR1/STAT3/PRKAA1	15
GO:0009150	BP	GO:0009150	purine ribonucleotide metabolic process	37/1057	366/18800	0.00041113	0.00744237	0.00582977	APP/ATP6V0C/INSR/ACSL3/ATP6V1A/ACSL4/PPARGC1A/PRKAA2/NME3/OGDHL/TPST2/OGT/ACSL1/NUDT4/OGDH/HMGCR/PANK3/SLC4A4/ACSS1/AK3/PPT1/PFKL/AK4/TECR/MCCC2/PAPSS2/HSD17B12/FAR1/HIF1A/ZBTB20/DLD/NCOR1/STAT3/PRKAA1/OPA1/CASK/RHOQ	37
GO:0098657	BP	GO:0098657	import into cell	27/1057	238/18800	0.00041582	0.00749141	0.00586818	ATP1A1/ATP1B1/SLC12A1/SLC5A3/KCNJ16/SCNN1A/ITGB1/ACSL3/THBS1/WNK4/KCNJ1/ARL6IP1/FOLR1/SLC39A6/KCNJ10/ATP1B2/ACSL1/WNK1/FXYD2/SLC43A2/SLC38A1/SLC39A10/SLC7A8/ARL6IP5/SLC1A5/ATP1B3/SLC3A2	27
GO:0051604	BP	GO:0051604	protein maturation	33/1057	314/18800	0.00041683	0.00749141	0.00586818	TMEM59/CALR/PLAU/CYFIP2/THBS1/CPD/SORL1/BACE2/ZMPSTE24/SPCS2/ATP6AP2/CLN5/GLG1/SPPL3/OGT/HPN/ASPH/CTSL/ADAM10/CPM/YME1L1/LGMN/SPCS3/TSPAN14/PRKACB/PERP/TMEM208/XIAP/MYH9/SOX4/OMA1/YIPF5/HM13	33
GO:0061351	BP	GO:0061351	neural precursor cell proliferation	19/1057	143/18800	0.00041966	0.00749141	0.00586818	EGF/CTNNB1/SPINT2/VEGFA/PROX1/PLXNB2/ADGRG1/FZD6/SPINT1/POU3F3/PCM1/RERE/RYK/BTG2/NF1/PTBP2/HIF1A/EMX2/ZNF503	19
GO:0071456	BP	GO:0071456	cellular response to hypoxia	19/1057	143/18800	0.00041966	0.00749141	0.00586818	MALAT1/SFRP1/TMBIM6/ZFP36L1/CASR/VEGFA/MDM4/HIPK2/CPEB2/EGR1/NPEPPS/HYOU1/DDAH1/P4HB/AK4/HIF1A/PRKAA1/NDRG1/ATF2	19
GO:0015807	BP	GO:0015807	L-amino acid transport	12/1057	69/18800	0.00042241	0.00749141	0.00586818	ITGB1/SLC3A1/ARL6IP1/SERINC3/KCNJ10/SLC38A2/SLC43A2/SLC38A1/SLC7A8/ARL6IP5/SLC1A5/SLC3A2	12
GO:0034394	BP	GO:0034394	protein localization to cell surface	12/1057	69/18800	0.00042241	0.00749141	0.00586818	EGF/ERBB4/CTNNB1/NEDD4L/ANK2/FLNA/VCL/UNC50/MESD/GGA2/LEPROT/AP3B1	12
GO:0043266	BP	GO:0043266	regulation of potassium ion transport	16/1057	110/18800	0.00042443	0.00749141	0.00586818	ATP1B1/AKAP9/ITGB1/WNK4/ANK3/NEDD4L/ATP1B2/WNK1/FXYD2/ANK2/FLNA/CD63/KLHL24/ANO6/KIF5B/ATP1B3	16
GO:0001656	BP	GO:0001656	metanephros development	14/1057	89/18800	0.00042513	0.00749141	0.00586818	CTNNB1/LGR4/GPC3/EGR1/PKD2/POU3F3/PAX2/SALL1/YAP1/NIPBL/NF1/TFAP2B/STAT1/PDGFA	14
GO:0007041	BP	GO:0007041	lysosomal transport	17/1057	121/18800	0.00043088	0.00756749	0.00592777	PSAP/TMEM106B/SORL1/LAMP1/IGF2R/LAMP2/SORT1/AP1G1/SCARB2/GRN/M6PR/ARL8B/ZFYVE16/GCC2/AP3B1/RHOB/HSPA1A	17
GO:1900151	BP	GO:1900151	regulation of nuclear-transcribed mRNA catabolic process, deadenylation-dependent decay	7/1057	26/18800	0.00044551	0.00777122	0.00608736	ZFP36L1/ZFP36/TNRC6B/TOB1/HNRNPU/SYNCRIP/ZFP36L2	7
GO:0060149	BP	GO:0060149	negative regulation of post-transcriptional gene silencing	6/1057	19/18800	0.00044834	0.00777122	0.00608736	NEAT1/ZMPSTE24/KCNQ1OT1/ADAR/NCOR1/ELAVL1	6
GO:0060967	BP	GO:0060967	negative regulation of gene silencing by RNA	6/1057	19/18800	0.00044834	0.00777122	0.00608736	NEAT1/ZMPSTE24/KCNQ1OT1/ADAR/NCOR1/ELAVL1	6
GO:1900369	BP	GO:1900369	negative regulation of post-transcriptional gene silencing by RNA	6/1057	19/18800	0.00044834	0.00777122	0.00608736	NEAT1/ZMPSTE24/KCNQ1OT1/ADAR/NCOR1/ELAVL1	6
GO:0046939	BP	GO:0046939	nucleotide phosphorylation	15/1057	100/18800	0.0004547	0.00783905	0.00614049	APP/INSR/PRKAA2/NME3/OGDHL/OGT/OGDH/SLC4A4/PFKL/AK4/HIF1A/ZBTB20/NCOR1/STAT3/PRKAA1	15
GO:1903078	BP	GO:1903078	positive regulation of protein localization to plasma membrane	11/1057	60/18800	0.00045521	0.00783905	0.00614049	ITGB1/ACSL3/SPTBN1/ATP2C1/ZDHHC2/PGRMC1/PRKCI/KIF5B/EZR/PDPK1/RER1	11
GO:0051592	BP	GO:0051592	response to calcium ion	19/1057	144/18800	0.00045852	0.0078706	0.00616521	FOS/SUCNR1/JUNB/THBS1/CASR/FOSB/PRKAA2/IQGAP1/PKD2/HSPA5/JUN/LGMN/SDC1/MEF2C/AHCYL1/JUND/PRKAA1/SEC31A/MEF2A	19
GO:0031098	BP	GO:0031098	stress-activated protein kinase signaling cascade	28/1057	252/18800	0.00046004	0.00787107	0.00616558	APP/SFRP1/MECOM/ZFP36L1/HACD3/CASR/VEGFA/HIPK2/ZFP36/ZMPSTE24/DUSP1/PLCB1/IGF1R/HIPK3/TAOK1/RNF13/EMC10/MAPK1/GADD45B/PJA2/ARL6IP5/EZR/MFHAS1/MAP4K3/XIAP/NCOR1/CDC42/ATF2	28
GO:0060541	BP	GO:0060541	respiratory system development	24/1057	203/18800	0.00046822	0.0079431	0.006222	CTNNB1/TMEM38B/VEGFA/SRSF6/GPC3/PROX1/SREBF1/MAN2A1/LAMA5/ITGB6/MAN1A2/LTBP3/LIPA/FGF9/SIM2/MAPK1/YAP1/HOXA5/SP3/CDC42/SMAD2/AP3B1/PDGFA/YWHAZ	24
GO:0008347	BP	GO:0008347	glial cell migration	10/1057	51/18800	0.00046874	0.0079431	0.006222	CD9/CTNNB1/RTN4/SYNE2/ADGRG1/ATP1B2/LAMB1/ZMIZ1/SUN1/CERS2	10
GO:0060688	BP	GO:0060688	regulation of morphogenesis of a branching structure	10/1057	51/18800	0.00046874	0.0079431	0.006222	SFRP1/CTNNB1/RTN4/LGR4/VEGFA/NTN4/PAX2/TACSTD2/MAGED1/PDGFA	10
GO:0048593	BP	GO:0048593	camera-type eye morphogenesis	17/1057	122/18800	0.00047496	0.00802285	0.00628447	CTNNB1/VEGFA/NTRK2/HIPK2/JAG1/OBSL1/PROX1/MAN2A1/FAT1/TSPAN12/PAX2/HIPK1/NF1/HIF1A/TFAP2B/SP3/ABI2	17
GO:0007015	BP	GO:0007015	actin filament organization	43/1057	450/18800	0.00048809	0.00814624	0.00638112	SFRP1/HSP90B1/CXCL12/SDC4/CGNL1/SPTBN1/CYFIP2/FAM171A1/CD47/SCIN/PROX1/PLS3/NCKAP1/FAT1/PLEKHH2/MYO6/DIAPH1/HIP1/LIMCH1/SPTAN1/FLNA/RHOBTB3/HIP1R/PRKCI/ITGB5/RICTOR/ADD3/CARMIL1/PHLDB2/TACSTD2/MPRIP/EZR/TJP1/ARHGAP35/ARHGAP6/NEDD9/PAWR/ABI2/ARFGEF1/RDX/CDC42/WDR1/RHOB	43
GO:0042063	BP	GO:0042063	gliogenesis	31/1057	291/18800	0.00048832	0.00814624	0.00638112	APP/CD9/CTNNB1/RTN4/MAL/NTRK2/SYNE2/ERBB2/ADGRG1/IL6ST/SPINT1/KCNJ10/ATP1B2/LAMB1/DICER1/UFL1/ZMIZ1/SUN1/SOX6/PRKCI/PAX2/GRN/MAPK1/NF1/SLC25A46/CERS2/STAT3/SOX4/NDRG1/WDR1/METRN	31
GO:0035437	BP	GO:0035437	maintenance of protein localization in endoplasmic reticulum	5/1057	13/18800	0.00048994	0.00814624	0.00638112	HSPA5/GPAA1/OS9/KDELR2/RER1	5
GO:0060213	BP	GO:0060213	positive regulation of nuclear-transcribed mRNA poly(A) tail shortening	5/1057	13/18800	0.00048994	0.00814624	0.00638112	ZFP36/TNRC6A/TNRC6B/TOB1/BTG2	5
GO:0070424	BP	GO:0070424	regulation of nucleotide-binding oligomerization domain containing signaling pathway	5/1057	13/18800	0.00048994	0.00814624	0.00638112	HSPA1B/ERBIN/XIAP/BIRC2/HSPA1A	5
GO:2001233	BP	GO:2001233	regulation of apoptotic signaling pathway	37/1057	370/18800	0.00050576	0.00836892	0.00655555	SFRP1/MUC1/TMBIM6/CXCL12/CTNNB1/MAL/THBS1/HSPA1B/IVNS1ABP/BCAP31/PTTG1IP/BIRC6/SFPQ/ITGA6/GRINA/ITGAV/SERINC3/CTSC/SELENOS/HYOU1/SGMS1/PDIA3/BCLAF1/ITM2C/PHIP/P4HB/YAP1/NF1/TCF7L2/HERPUD1/HIF1A/MAGED1/PPP2R1A/OPA1/TMEM14A/DDX3X/HSPA1A	37
GO:0001649	BP	GO:0001649	osteoblast differentiation	27/1057	241/18800	0.00050649	0.00836892	0.00655555	SPP1/SFRP1/CRIM1/CTNNB1/COL6A1/JUNB/LGR4/JAG1/CLTC/NELL1/IL6ST/RRBP1/CCDC47/TOB1/UFL1/PTH1R/HNRNPU/FGF9/YAP1/NF1/SMAD5/PRKD1/MEF2C/ADAR/JUND/SYNCRIP/REST	27
GO:0009185	BP	GO:0009185	ribonucleoside diphosphate metabolic process	16/1057	112/18800	0.00052089	0.00855642	0.00670243	APP/INSR/PRKAA2/OGDHL/OGT/OGDH/SLC4A4/AK3/PFKL/AK4/HIF1A/ZBTB20/NCOR1/STAT3/PRKAA1/CASK	16
GO:0007162	BP	GO:0007162	negative regulation of cell adhesion	32/1057	305/18800	0.00052106	0.00855642	0.00670243	MUC1/CD9/KNG1/CXCL12/SDC4/CYP1B1/CD164/PLXNB1/THBS1/SPINT2/VEGFA/PRKAR1A/ACTN4/JAG1/ERBB2/PLXNB2/GPNMB/CDH1/DUSP1/FGL2/WNK1/EPCAM/ADAM10/NDFIP1/PHLDB2/NF1/TACSTD2/ARHGAP6/PAWR/EPB41L5/RDX/CASK	32
GO:0021885	BP	GO:0021885	forebrain cell migration	11/1057	61/18800	0.00052757	0.00860998	0.00674438	CXCL12/CTNNB1/RTN4/SYNE2/ADGRG1/POU3F3/LAMB1/OGDH/ZMIZ1/SUN1/EMX2	11
GO:0030865	BP	GO:0030865	cortical cytoskeleton organization	11/1057	61/18800	0.00052757	0.00860998	0.00674438	CALR/AKAP11/NCKAP1/RHOBTB3/EZR/EPB41L3/PDCD6IP/LLGL2/WDR1/RHOB/RHOQ	11
GO:0016482	BP	GO:0016482	cytosolic transport	21/1057	169/18800	0.00053597	0.00872025	0.00683076	SORL1/CLTC/LAMP1/PREPL/CLN5/VPS13C/VPS13A/SORT1/AP1G1/MON2/FLNA/RHOBTB3/STX16/MAPK1/ARL8B/KIF5B/EZR/GCC2/RAB21/RDX/SPAG9	21
GO:0006401	BP	GO:0006401	RNA catabolic process	30/1057	280/18800	0.00054304	0.00880814	0.0068996	ZFP36L1/CELF1/HSPA1B/SMG1/ZFP36/TNRC6A/KCNQ1OT1/TNRC6B/DICER1/TOB1/MYEF2/YTHDF3/FMR1/HNRNPU/PUM2/BTG2/TENT2/PUM1/LRPPRC/XRN1/SMG7/FUS/ELAVL1/LARP1/TUT4/CNOT6L/SYNCRIP/TARDBP/ZFP36L2/HSPA1A	30
GO:0035196	BP	GO:0035196	production of miRNAs involved in gene silencing by miRNA	10/1057	52/18800	0.00055152	0.0088913	0.00696474	ZMPSTE24/DICER1/PUM2/PUM1/ADAR/NCOR1/STAT3/TUT4/SMAD2/DDX3X	10
GO:0086009	BP	GO:0086009	membrane repolarization	10/1057	52/18800	0.00055152	0.0088913	0.00696474	ATP1A1/ATP1B1/AKAP9/ZMPSTE24/NEDD4L/ATP1B2/ANK2/FLNA/ATP1B3/WDR1	10
GO:0006096	BP	GO:0006096	glycolytic process	13/1057	81/18800	0.00055366	0.00889875	0.00697058	APP/INSR/PRKAA2/OGDHL/OGT/OGDH/SLC4A4/PFKL/HIF1A/ZBTB20/NCOR1/STAT3/PRKAA1	13
GO:0051017	BP	GO:0051017	actin filament bundle assembly	20/1057	158/18800	0.00056691	0.00908431	0.00711593	SFRP1/HSP90B1/SDC4/CGNL1/FAM171A1/CD47/PLS3/LIMCH1/FLNA/ITGB5/CARMIL1/PHLDB2/TACSTD2/EZR/TJP1/ARHGAP6/NEDD9/PAWR/RDX/CDC42	20
GO:1903035	BP	GO:1903035	negative regulation of response to wounding	14/1057	92/18800	0.00060021	0.00958885	0.00751116	SPP1/CD9/KNG1/PLAU/THBS1/SERPING1/TSPAN8/CLDN19/PHLDB2/CLDN3/CERS2/TFPI/PDGFA/CASK	14
GO:0001701	BP	GO:0001701	in utero embryonic development	38/1057	387/18800	0.00060749	0.00963259	0.00754541	CTNNB1/RTN4/N4BP2L2/TMED2/ZFP36L1/ITGB1/JUNB/SPINT2/VEGFA/KIDINS220/PKD2/HECTD1/BIRC6/MIB1/MAN2A1/NR2F2/SPINT1/ACVR1B/TBL1XR1/PTH1R/ADAM10/BPTF/ZMIZ1/MAPK1/YAP1/SETD2/MBNL1/CUL4A/HIF1A/ZFAND5/YTHDC1/MYH9/RBBP8/SP3/EPB41L5/HM13/SMAD2/ATF2	38
GO:0007163	BP	GO:0007163	establishment or maintenance of cell polarity	25/1057	219/18800	0.00060967	0.00963259	0.00754541	ITGB1/SPINT2/PKHD1/DST/FAT1/PATJ/IGF1R/ERBIN/MYO9A/GOLPH3/WEE1/AMOTL2/RHOBTB3/PRKCI/RICTOR/ARHGAP35/MAP7/MYH9/PDCD6IP/LLGL2/ARFGEF1/WWC1/CDC42/WDR1/RHOB	25
GO:0036498	BP	GO:0036498	IRE1-mediated unfolded protein response	6/1057	20/18800	0.00061021	0.00963259	0.00754541	TMEM33/HSPA5/DNAJC10/UFL1/DNAJB9/DDRGK1	6
GO:0072170	BP	GO:0072170	metanephric tubule development	6/1057	20/18800	0.00061021	0.00963259	0.00754541	LGR4/PKD2/POU3F3/PAX2/YAP1/STAT1	6
GO:0097193	BP	GO:0097193	intrinsic apoptotic signaling pathway	31/1057	295/18800	0.00061544	0.00968634	0.00758752	MUC1/TMBIM6/CXCL12/CYP1B1/FNIP2/ITPR1/HIPK2/IVNS1ABP/BCAP31/PTTG1IP/SFPQ/GRINA/DNAJC10/SERINC3/PRKDC/SELENOS/HYOU1/SGMS1/BCLAF1/P4HB/HIPK1/ARL6IP5/CUL4A/PERP/HERPUD1/HIF1A/OPA1/CUL5/DDX3X/ATF2/HSPA1A	31
GO:0006757	BP	GO:0006757	ATP generation from ADP	13/1057	82/18800	0.00062471	0.0098003	0.00767678	APP/INSR/PRKAA2/OGDHL/OGT/OGDH/SLC4A4/PFKL/HIF1A/ZBTB20/NCOR1/STAT3/PRKAA1	13
GO:1903076	BP	GO:1903076	regulation of protein localization to plasma membrane	15/1057	103/18800	0.00062638	0.0098003	0.00767678	TMEM59/ITGB1/ACSL3/SPTBN1/ATP2C1/CLTC/HECTD1/ZDHHC2/PGRMC1/PRKCI/KIF5B/EZR/PDPK1/RER1/RHOQ	15
GO:0050810	BP	GO:0050810	regulation of steroid biosynthetic process	12/1057	72/18800	0.00063057	0.00980809	0.00768289	ATP1A1/IGFBP7/PROX1/EGR1/SREBF1/SF1/IGF1R/ERLIN2/ASAH1/MBTPS1/PRKAA1/REST	12
GO:0072078	BP	GO:0072078	nephron tubule morphogenesis	12/1057	72/18800	0.00063057	0.00980809	0.00768289	CTNNB1/LGR4/VEGFA/WNK4/GPC3/PBX1/PKD2/LAMA5/PAX2/SALL1/TACSTD2/MAGED1	12
GO:0048260	BP	GO:0048260	positive regulation of receptor-mediated endocytosis	10/1057	53/18800	0.00064603	0.00999333	0.00782799	EGF/INSR/VEGFA/SGIP1/HIP1/FMR1/ATAD1/CD63/PPT1/RAB21	10
GO:0062208	BP	GO:0062208	positive regulation of pattern recognition receptor signaling pathway	9/1057	44/18800	0.00064625	0.00999333	0.00782799	RTN4/HSPA1B/PUM2/PUM1/ANKRD17/PJA2/MFHAS1/DDX3X/HSPA1A	9
GO:0045732	BP	GO:0045732	positive regulation of protein catabolic process	26/1057	233/18800	0.00067693	0.0104372	0.00817571	EGF/CD81/SORL1/GPC3/HSPA1B/HECTD1/BCAP31/PTTG1IP/NEDD4L/CTSC/TMEM259/NDFIP1/SEC22B/FMR1/HUWE1/DDB1/ZYG11B/ANKIB1/EZR/HERPUD1/FBXL5/RDX/WWP1/CSNK1A1/DDRGK1/HSPA1A	26
GO:0000288	BP	GO:0000288	nuclear-transcribed mRNA catabolic process, deadenylation-dependent decay	11/1057	63/18800	0.00070129	0.0107504	0.00842099	ZFP36L1/ZFP36/TNRC6A/TNRC6B/TOB1/HNRNPU/BTG2/TUT4/CNOT6L/SYNCRIP/ZFP36L2	11
GO:0060675	BP	GO:0060675	ureteric bud morphogenesis	11/1057	63/18800	0.00070129	0.0107504	0.00842099	CTNNB1/LGR4/VEGFA/GPC3/PBX1/PKD2/LAMA5/PAX2/SALL1/TACSTD2/MAGED1	11
GO:0048041	BP	GO:0048041	focal adhesion assembly	13/1057	83/18800	0.00070331	0.0107504	0.00842099	SFRP1/SDC4/THBS1/VEGFA/PTPRA/SLK/ITGA2/MACF1/LIMCH1/VCL/PHLDB2/ARHGAP6/EPB41L5	13
GO:0010837	BP	GO:0010837	regulation of keratinocyte proliferation	8/1057	36/18800	0.00071793	0.0108312	0.00848431	ZFP36L1/SRSF6/ZFP36/YAP1/KLF9/PRKD1/STXBP4/CASK	8
GO:0032350	BP	GO:0032350	regulation of hormone metabolic process	8/1057	36/18800	0.00071793	0.0108312	0.00848431	ATP1A1/EGR1/ZMPSTE24/HPN/IGF1R/TCF7L2/HIF1A/REST	8
GO:0051656	BP	GO:0051656	establishment of organelle localization	39/1057	404/18800	0.00072004	0.0108312	0.00848431	CTNNB1/SDC4/TMED2/ITGB1/SYNE2/PKHD1/ACTN4/TMED10/LAMP1/XPO1/CLMN/MYO6/PCM1/SAR1A/SUN1/WDR11/HNRNPU/LRPPRC/SDC1/TRIP11/DYNC1H1/KIF5B/FAM91A1/RHOT2/ARMCX3/EZR/SAR1B/HIF1A/MYH9/PDCD6IP/LLGL2/TMED9/OPA1/BICDL1/CDC42/PDPK1/AP3B1/YWHAZ/COPG1	39
GO:0060560	BP	GO:0060560	developmental growth involved in morphogenesis	26/1057	234/18800	0.00072188	0.0108312	0.00848431	APP/SPP1/SFRP1/CXCL12/CTNNB1/RTN4/SEMA6D/ITGB1/CYFIP2/VEGFA/IQGAP1/NEDD4L/MACF1/DDR1/IST1/VCL/GOLGA4/RYK/SALL1/YAP1/ADNP/USP9X/EPB41L5/RAB21/DPYSL2/SPAG9	26
GO:0000289	BP	GO:0000289	nuclear-transcribed mRNA poly(A) tail shortening	7/1057	28/18800	0.00072664	0.0108312	0.00848431	ZFP36/TNRC6A/TNRC6B/TOB1/BTG2/TUT4/CNOT6L	7
GO:0098901	BP	GO:0098901	regulation of cardiac muscle cell action potential	7/1057	28/18800	0.00072664	0.0108312	0.00848431	AKAP9/DSG2/ATP2A2/DSP/CXADR/ANK2/JUP	7
GO:0072160	BP	GO:0072160	nephron tubule epithelial cell differentiation	5/1057	14/18800	0.00072698	0.0108312	0.00848431	CTNNB1/PAX2/YAP1/MEF2C/STAT1	5
GO:0090158	BP	GO:0090158	endoplasmic reticulum membrane organization	5/1057	14/18800	0.00072698	0.0108312	0.00848431	RTN4/TMED2/ARL6IP1/ATL2/REEP5	5
GO:1903894	BP	GO:1903894	regulation of IRE1-mediated unfolded protein response	5/1057	14/18800	0.00072698	0.0108312	0.00848431	TMEM33/HSPA5/UFL1/DNAJB9/DDRGK1	5
GO:0061013	BP	GO:0061013	regulation of mRNA catabolic process	21/1057	173/18800	0.00073084	0.0108533	0.00850165	ZFP36L1/CELF1/ZFP36/TNRC6A/TNRC6B/TOB1/MYEF2/YTHDF3/FMR1/HNRNPU/PUM2/BTG2/PUM1/FUS/ELAVL1/LARP1/TUT4/CNOT6L/SYNCRIP/TARDBP/ZFP36L2	21
GO:0043087	BP	GO:0043087	regulation of GTPase activity	36/1057	364/18800	0.00073256	0.0108533	0.00850165	SFRP1/TMED2/PROM2/ITGB1/PLXNB1/TBC1D4/NTRK2/CPEB2/ERBB2/PLXNB2/IQGAP1/AGRN/ITGA6/CCPG1/PKP4/WNK1/RALGAPA1/MYO9A/PBXIP1/RAP1GAP/RAB3GAP1/TBC1D9/RICTOR/SNX13/AFDN/MMUT/RGL3/DENND1B/NF1/ARHGAP35/ARHGAP29/ASAP2/ARHGAP6/NEDD9/ARFGEF1/RDX	36
GO:0031667	BP	GO:0031667	response to nutrient levels	42/1057	446/18800	0.00075725	0.0111879	0.00876375	SPP1/SFRP1/CPEB4/CYP1B1/CASR/IGFBP2/GCGR/LPL/SORL1/PPARGC1A/PROX1/PRKAA2/HSD11B2/ZFP36/SREBF1/SGIP1/TNRC6A/ATP2B1/FOLR1/SHANK2/HSPA5/OGT/LAMP2/GAS6/ITGA2/ACSL1/TBL1XR1/IGF1R/GDF15/SLC38A2/AGL/PAX2/MAPK1/KL/PRKD1/USP33/EIF4G1/LARP1/PRKAA1/OMA1/STAT1/ATF2	42
GO:0061572	BP	GO:0061572	actin filament bundle organization	20/1057	162/18800	0.00078105	0.0114845	0.00899605	SFRP1/HSP90B1/SDC4/CGNL1/FAM171A1/CD47/PLS3/LIMCH1/FLNA/ITGB5/CARMIL1/PHLDB2/TACSTD2/EZR/TJP1/ARHGAP6/NEDD9/PAWR/RDX/CDC42	20
GO:0048608	BP	GO:0048608	reproductive structure development	41/1057	433/18800	0.00078166	0.0114845	0.00899605	SPP1/SFRP1/BSG/PSAP/CTNNB1/CYP1B1/TMED2/INSR/ZFP36L1/JUNB/LGR4/SPINT2/VEGFA/ATRX/ADGRG1/PKD2/HECTD1/BIRC6/NR2F2/SPINT1/HSPA5/ASH1L/PRLR/SF1/BPTF/RHOBTB3/FGF9/KITLG/SALL1/SDC1/MAPK1/NIPBL/SETD2/CTSB/NRIP1/ITGB8/HIF1A/BIRC2/UBE3A/SP3/PDGFA	41
GO:0010634	BP	GO:0010634	positive regulation of epithelial cell migration	21/1057	174/18800	0.0007882	0.0115442	0.0090428	EGF/CALR/RTN4/THBS1/VEGFA/PROX1/ITGA2/FOXP1/JUN/EMC10/LGMN/GRN/DOCK1/PRKD1/RIN2/SP1/HIF1A/EPB41L5/PDPK1/PIK3C2A/RHOB	21
GO:0071277	BP	GO:0071277	cellular response to calcium ion	13/1057	84/18800	0.00079007	0.0115442	0.0090428	FOS/JUNB/FOSB/PRKAA2/IQGAP1/PKD2/HSPA5/JUN/LGMN/MEF2C/JUND/PRKAA1/MEF2A	13
GO:0019216	BP	GO:0019216	regulation of lipid metabolic process	34/1057	339/18800	0.00079533	0.0115743	0.00906643	ATP1A1/CD81/PSAP/IGFBP7/ACSL3/SORL1/PPARGC1A/FGFR3/PROX1/EGR1/SREBF1/ZMPSTE24/GOLM1/SF1/TBL1XR1/IGF1R/PLIN5/ERLIN2/ASAH1/MTLN/ACADVL/PRKD1/RARRES2/BSCL2/MBTPS1/ZBTB20/NCOR1/CERS2/PRKAA1/PNPLA2/REST/CDC42/ORMDL1/PDGFA	34
GO:0051384	BP	GO:0051384	response to glucocorticoid	18/1057	139/18800	0.00080059	0.0115743	0.00906643	FOS/IGFBP7/CYP1B1/ZFP36L1/FOSB/IGFBP2/HSD11B2/ZFP36/ATP2B1/IGF1R/HNRNPU/GLB1/AGL/PAM/SDC1/KLF9/REST/ZFP36L2	18
GO:0098876	BP	GO:0098876	vesicle-mediated transport to the plasma membrane	18/1057	139/18800	0.00080059	0.0115743	0.00906643	ACSL3/SPTBN1/ATP2C1/SORL1/KIAA1109/CMTM6/ATP6AP1/PREPL/ANK3/CLSTN1/MACF1/GOLPH3/ARFGEF2/ZDHHC2/GOLGA4/DENND1B/GGA2/RAB11FIP3	18
GO:0072171	BP	GO:0072171	mesonephric tubule morphogenesis	11/1057	64/18800	0.00080454	0.0115743	0.00906643	CTNNB1/LGR4/VEGFA/GPC3/PBX1/PKD2/LAMA5/PAX2/SALL1/TACSTD2/MAGED1	11
GO:1903018	BP	GO:1903018	regulation of glycoprotein metabolic process	11/1057	64/18800	0.00080454	0.0115743	0.00906643	ITM2B/TMEM59/CST3/TM9SF2/CTNNB1/BACE2/PLCB1/ITM2C/TCF7L2/PAWR/ARFGEF1	11
GO:0007040	BP	GO:0007040	lysosome organization	12/1057	74/18800	0.00081243	0.0115743	0.00906643	TMEM106B/ATP6AP2/CLN5/TMEM9/TMEM165/SCARB2/GRN/PPT1/ARL8B/LAPTM4B/MBTPS1/AP3B1	12
GO:0080171	BP	GO:0080171	lytic vacuole organization	12/1057	74/18800	0.00081243	0.0115743	0.00906643	TMEM106B/ATP6AP2/CLN5/TMEM9/TMEM165/SCARB2/GRN/PPT1/ARL8B/LAPTM4B/MBTPS1/AP3B1	12
GO:0007097	BP	GO:0007097	nuclear migration	6/1057	21/18800	0.00081396	0.0115743	0.00906643	SYNE2/CLMN/PCM1/SUN1/DYNC1H1/CDC42	6
GO:0045056	BP	GO:0045056	transcytosis	6/1057	21/18800	0.00081396	0.0115743	0.00906643	GP2/CLTC/IGF1R/LRPAP1/FCGRT/MAL2	6
GO:0072243	BP	GO:0072243	metanephric nephron epithelium development	6/1057	21/18800	0.00081396	0.0115743	0.00906643	LGR4/PKD2/POU3F3/PAX2/YAP1/STAT1	6
GO:0006814	BP	GO:0006814	sodium ion transport	27/1057	249/18800	0.00083817	0.0118868	0.00931116	ATP1A1/ATP1B1/SLC12A1/SLC5A3/SCNN1A/WNK4/ACTN4/PKD2/ANK3/PRSS8/NEDD4L/ATP1B2/WNK1/FXYD2/SLC38A10/UTRN/SLC20A1/SLC38A2/SLC6A8/MLLT6/SLC38A1/KLHL24/SLC4A4/ANO6/ATP1B3/SLC3A2/AHCYL1	27
GO:0048568	BP	GO:0048568	embryonic organ development	42/1057	449/18800	0.00086496	0.012234	0.00958314	CTNNB1/TMED2/ZFP36L1/JUNB/SPINT2/VEGFA/HIPK2/PBX1/PROX1/HOXB3/PKD2/HECTD1/BIRC6/MIB1/NR2F2/FZD6/TEAD1/FOLR1/KMT2A/SPINT1/HPN/MYO6/BPTF/ARID2/PAX2/FGF9/TRA2B/KITLG/HIPK1/SALL1/MAPK1/YAP1/NIPBL/SETD2/RARRES2/MEF2C/HIF1A/HOXA5/SP3/CDC42/SMAD2/PDGFA	42
GO:0033120	BP	GO:0033120	positive regulation of RNA splicing	8/1057	37/18800	0.0008714	0.0122597	0.00960329	TRA2A/POLR2A/SLC38A2/SETX/TRA2B/DYRK1A/SNRNP70/HSPA1A	8
GO:1903580	BP	GO:1903580	positive regulation of ATP metabolic process	8/1057	37/18800	0.0008714	0.0122597	0.00960329	APP/INSR/PPARGC1A/PRKAA2/SLC4A4/HIF1A/ZBTB20/PRKAA1	8
GO:0007179	BP	GO:0007179	transforming growth factor beta receptor signaling pathway	23/1057	200/18800	0.00089369	0.0124839	0.00977887	FOS/THBS1/HIPK2/GLG1/FOLR1/HSPA5/ITGB6/ZMIZ1/GDF15/JUN/LTBP3/ITGB5/SMAD5/USP9X/ZNF451/PEG10/TRIM33/ITGB8/STAT3/PPM1A/SMAD2/PDPK1/HSPA1A	23
GO:0034284	BP	GO:0034284	response to monosaccharide	23/1057	200/18800	0.00089369	0.0124839	0.00977887	THBS1/CASR/LPL/COL4A3/EGR1/PRKAA2/SREBF1/PLCB1/GAS6/ITGA2/IGF1R/SELENOS/PAX2/TRA2B/PFKL/TCF7L2/HIF1A/ZBTB20/SMARCA4/PRKAA1/SOX4/STXBP4/SMAD2	23
GO:0061458	BP	GO:0061458	reproductive system development	41/1057	436/18800	0.00089439	0.0124839	0.00977887	SPP1/SFRP1/BSG/PSAP/CTNNB1/CYP1B1/TMED2/INSR/ZFP36L1/JUNB/LGR4/SPINT2/VEGFA/ATRX/ADGRG1/PKD2/HECTD1/BIRC6/NR2F2/SPINT1/HSPA5/ASH1L/PRLR/SF1/BPTF/RHOBTB3/FGF9/KITLG/SALL1/SDC1/MAPK1/NIPBL/SETD2/CTSB/NRIP1/ITGB8/HIF1A/BIRC2/UBE3A/SP3/PDGFA	41
GO:0035601	BP	GO:0035601	protein deacylation	17/1057	129/18800	0.00090672	0.0126067	0.0098751	VEGFA/PRKAA2/SREBF1/RBBP4/SFPQ/TBL1XR1/FLNA/KDM5A/CTBP1/DYRK1A/PPT1/NIPBL/PRKD1/ABHD17C/PRKAA1/CHD4/REST	17
GO:0030521	BP	GO:0030521	androgen receptor signaling pathway	9/1057	46/18800	0.00090795	0.0126067	0.0098751	SFRP1/DDX17/ARID1A/ZMIZ1/FOXP1/PIAS2/SMARCA4/NCOR1/UBE3A	9
GO:0034067	BP	GO:0034067	protein localization to Golgi apparatus	7/1057	29/18800	0.00091185	0.0126279	0.00989169	SORL1/OBSL1/TMED10/VPS13C/VPS13A/GOLPH3/GCC2	7
GO:0120192	BP	GO:0120192	tight junction assembly	12/1057	75/18800	0.00091861	0.0126756	0.00992908	CLDN16/OCLN/CLDN10/PATJ/CLDN19/AFDN/CLDN4/TJP1/CLDN3/CLDN7/PDCD6IP/MARVELD2	12
GO:1905330	BP	GO:1905330	regulation of morphogenesis of an epithelium	11/1057	65/18800	0.00092008	0.0126756	0.00992908	EGF/SFRP1/CTNNB1/LGR4/VEGFA/NTN4/FOXP1/PAX2/TACSTD2/MAGED1/PDGFA	11
GO:0008286	BP	GO:0008286	insulin receptor signaling pathway	16/1057	118/18800	0.00093061	0.0127543	0.00999076	INSR/SORL1/SREBF1/PTPRA/NUCKS1/OGT/IGF1R/C2CD5/PHIP/KL/RARRES2/PRKAA1/STXBP4/PIK3C2A/RHOQ/EIF4EBP2	16
GO:1904019	BP	GO:1904019	epithelial cell apoptotic process	16/1057	118/18800	0.00093061	0.0127543	0.00999076	ZFP36L1/THBS1/SRSF6/PKHD1/COL4A3/ZFP36/GAS6/IGF1R/PRKCI/HIPK1/YAP1/ANO6/TCF7L2/PRKAA1/PDPK1/ATF2	16
GO:0009101	BP	GO:0009101	glycoprotein biosynthetic process	32/1057	316/18800	0.000952	0.0130139	0.0101941	ITM2B/TMEM59/MAN1A1/TM9SF2/CTNNB1/HS6ST2/OGA/BACE2/MAGT1/MGAT4A/STT3B/MAN2A1/PLCB1/B3GNT2/RPN1/OGT/DPM3/KRTCAP2/RPN2/MAN1A2/TMEM165/GOLPH3/TUSC3/ITM2C/TRIP11/B4GALT1/TCF7L2/B3GAT3/GFPT1/PAWR/ARFGEF1/MLEC	32
GO:0009743	BP	GO:0009743	response to carbohydrate	25/1057	226/18800	0.00096438	0.0131493	0.0103001	ZFP36L1/THBS1/CASR/LPL/COL4A3/EGR1/PRKAA2/SREBF1/PLCB1/GAS6/ITGA2/IGF1R/SELENOS/PAX2/TRA2B/ADNP/PFKL/TCF7L2/HIF1A/ZBTB20/SMARCA4/PRKAA1/SOX4/STXBP4/SMAD2	25
GO:0009132	BP	GO:0009132	nucleoside diphosphate metabolic process	17/1057	130/18800	0.00098974	0.0134605	0.0105439	APP/INSR/PRKAA2/NME3/OGDHL/OGT/OGDH/SLC4A4/AK3/PFKL/AK4/HIF1A/ZBTB20/NCOR1/STAT3/PRKAA1/CASK	17
GO:0016570	BP	GO:0016570	histone modification	45/1057	494/18800	0.00099823	0.0135412	0.0106071	MUC1/CTNNB1/MECOM/VEGFA/PPARGC1A/PRKAA2/SREBF1/ATRX/ZMPSTE24/RBBP4/SFPQ/KMT2A/OGT/ASH1L/KANSL1/KMT2C/TBL1XR1/UFL1/PBXIP1/FMR1/MLLT6/HUWE1/KDM5A/DDB1/CTBP1/MYSM1/NIPBL/SETD2/JMJD1C/KAT6B/ZNF451/KMT2E/PRKD1/TRIP12/JADE1/BMI1/PHF20L1/PRKAA1/CHD4/NSD3/WAC/REST/USP22/ATF2/SMARCA5	45
GO:0009259	BP	GO:0009259	ribonucleotide metabolic process	37/1057	384/18800	0.00100689	0.0136238	0.0106718	APP/ATP6V0C/INSR/ACSL3/ATP6V1A/ACSL4/PPARGC1A/PRKAA2/NME3/OGDHL/TPST2/OGT/ACSL1/NUDT4/OGDH/HMGCR/PANK3/SLC4A4/ACSS1/AK3/PPT1/PFKL/AK4/TECR/MCCC2/PAPSS2/HSD17B12/FAR1/HIF1A/ZBTB20/DLD/NCOR1/STAT3/PRKAA1/OPA1/CASK/RHOQ	37
GO:0070918	BP	GO:0070918	primary sncRNA processing	10/1057	56/18800	0.00101276	0.0136684	0.0107067	ZMPSTE24/DICER1/PUM2/PUM1/ADAR/NCOR1/STAT3/TUT4/SMAD2/DDX3X	10
GO:0051346	BP	GO:0051346	negative regulation of hydrolase activity	36/1057	371/18800	0.00103242	0.0138218	0.0108269	APLP2/APP/KNG1/TMBIM6/CRIM1/CST3/WFDC2/TMED2/THBS1/SPINT2/VEGFA/SORL1/GPC3/COL4A3/CPEB2/TMED10/SERPINA5/BIRC6/ARL6IP1/SERPING1/SPINT1/GAS6/SORT1/BOD1L1/WNK1/PLIN5/KDM5A/BST2/PAX2/CTSB/XIAP/BIRC2/ARFGEF1/TFPI/RDX/DDX3X	36
GO:0061045	BP	GO:0061045	negative regulation of wound healing	12/1057	76/18800	0.00103609	0.0138218	0.0108269	CD9/KNG1/PLAU/THBS1/SERPING1/TSPAN8/CLDN19/PHLDB2/CLDN3/TFPI/PDGFA/CASK	12
GO:0060211	BP	GO:0060211	regulation of nuclear-transcribed mRNA poly(A) tail shortening	5/1057	15/18800	0.00104025	0.0138218	0.0108269	ZFP36/TNRC6A/TNRC6B/TOB1/BTG2	5
GO:0060766	BP	GO:0060766	negative regulation of androgen receptor signaling pathway	5/1057	15/18800	0.00104025	0.0138218	0.0108269	SFRP1/FOXP1/PIAS2/SMARCA4/NCOR1	5
GO:1900153	BP	GO:1900153	positive regulation of nuclear-transcribed mRNA catabolic process, deadenylation-dependent decay	5/1057	15/18800	0.00104025	0.0138218	0.0108269	ZFP36L1/ZFP36/TNRC6B/TOB1/ZFP36L2	5
GO:1904424	BP	GO:1904424	regulation of GTP binding	5/1057	15/18800	0.00104025	0.0138218	0.0108269	CLN5/CCPG1/PBXIP1/RAP1GAP/CSNK1A1	5
GO:0007369	BP	GO:0007369	gastrulation	22/1057	190/18800	0.00104498	0.0138218	0.0108269	SFRP1/WLS/CTNNB1/COL6A1/LMBRD1/ITGB1/GPC3/PRKAR1A/DUSP1/COL4A2/ITGAV/ITGA2/WNK1/LAMB1/TASOR/PAX2/ITGB5/PHLDB2/SETD2/DLD/EPB41L5/SMAD2	22
GO:1901654	BP	GO:1901654	response to ketone	22/1057	190/18800	0.00104498	0.0138218	0.0108269	SPP1/SFRP1/FOS/CALR/IGFBP7/CYP1B1/THBS1/FOSB/PRKAA2/SREBF1/ATP2B1/GAS6/IGF1R/GOLPH3/GLB1/YAP1/CLDN4/KLF9/XRN1/UBE3A/LARP1/PRKAA1	22
GO:0002478	BP	GO:0002478	antigen processing and presentation of exogenous peptide antigen	8/1057	38/18800	0.0010501	0.0138551	0.010853	CTSD/LNPEP/IFI30/CTSL/CTSF/LGMN/HLA-E/HLA-A	8
GO:0006883	BP	GO:0006883	cellular sodium ion homeostasis	6/1057	22/18800	0.00106641	0.0139844	0.0109543	ATP1A1/ATP1B1/SCNN1A/NEDD4L/ATP1B2/ATP1B3	6
GO:0019884	BP	GO:0019884	antigen processing and presentation of exogenous antigen	9/1057	47/18800	0.00106781	0.0139844	0.0109543	CTSD/LNPEP/IFI30/CTSL/CTSF/LGMN/HLA-E/HLA-A/AP3B1	9
GO:0070849	BP	GO:0070849	response to epidermal growth factor	9/1057	47/18800	0.00106781	0.0139844	0.0109543	ERBB4/ZFP36L1/ERBB2/ZFP36/IQGAP1/PAX2/MAPK1/PDPK1/ZFP36L2	9
GO:0009100	BP	GO:0009100	glycoprotein metabolic process	37/1057	386/18800	0.00110602	0.0144491	0.0113183	ITM2B/TMEM59/MAN1A1/CST3/TM9SF2/CTNNB1/HS6ST2/OGA/AMFR/BACE2/MAGT1/MGAT4A/STT3B/MAN2A1/PLCB1/B3GNT2/RPN1/OGT/DPM3/CTSL/KRTCAP2/RPN2/MAN1A2/TMEM165/GOLPH3/TUSC3/ITM2C/TRIP11/B4GALT1/TCF7L2/HIF1A/B3GAT3/GFPT1/PAWR/ARFGEF1/MLEC/PRKCSH	37
GO:0061337	BP	GO:0061337	cardiac conduction	14/1057	98/18800	0.00113753	0.0148243	0.0116122	ATP1A1/ATP1B1/AKAP9/DSG2/ZMPSTE24/ATP2A2/ATP2B1/ATP1B2/DSP/CXADR/ANK2/FLNA/JUP/MEF2A	14
GO:0034250	BP	GO:0034250	positive regulation of cellular amide metabolic process	20/1057	167/18800	0.00114379	0.0148693	0.0116474	CYP1B1/THBS1/ERBB2/PLXNB2/ITGA2/TOB1/PRKDC/YTHDF3/FMR1/HNRNPU/DNAJC3/LARP4/UHMK1/SP1/EIF4G1/ELAVL1/LARP1/SOX4/SYNCRIP/DDX3X	20
GO:0045913	BP	GO:0045913	positive regulation of carbohydrate metabolic process	12/1057	77/18800	0.00116579	0.0150289	0.0117725	EGF/APP/INSR/PPARGC1A/PRKAA2/PTH1R/SLC4A4/DDB1/EPM2AIP1/HIF1A/ZBTB20/PRKAA1	12
GO:0086001	BP	GO:0086001	cardiac muscle cell action potential	12/1057	77/18800	0.00116579	0.0150289	0.0117725	ATP1A1/ATP1B1/AKAP9/DSG2/ATP2A2/ANK3/NEDD4L/DSP/CXADR/ANK2/FLNA/JUP	12
GO:0007566	BP	GO:0007566	embryo implantation	10/1057	57/18800	0.00116741	0.0150289	0.0117725	SPP1/BSG/CALR/IGFBP7/VEGFA/ACVR1B/PRLR/DDR1/VMP1/YTHDF3	10
GO:0038066	BP	GO:0038066	p38MAPK cascade	10/1057	57/18800	0.00116741	0.0150289	0.0117725	ZFP36L1/VEGFA/ZFP36/DUSP1/EMC10/GADD45B/PJA2/EZR/MFHAS1/ATF2	10
GO:0052547	BP	GO:0052547	regulation of peptidase activity	42/1057	456/18800	0.00117044	0.0150315	0.0117745	APLP2/APP/KNG1/CTSD/CRIM1/CST3/WFDC2/CYFIP2/THBS1/SPINT2/VEGFA/SORL1/GPC3/COL4A3/TMED10/SERPINA5/BCAP31/BIRC6/ARL6IP1/SERPING1/SPINT1/GAS6/ASPH/HIP1/BST2/HIP1R/PAX2/LGMN/GRN/CLDN4/CTSB/ARL6IP5/DAPK1/PERP/CLDN3/XIAP/BIRC2/STAT3/TFPI/REST/DDX3X/DDRGK1	42
GO:1902305	BP	GO:1902305	regulation of sodium ion transmembrane transport	11/1057	67/18800	0.00119247	0.0152406	0.0119383	ATP1B1/WNK4/ACTN4/ANK3/NEDD4L/ATP1B2/WNK1/FXYD2/UTRN/KLHL24/ATP1B3	11
GO:1904377	BP	GO:1904377	positive regulation of protein localization to cell periphery	11/1057	67/18800	0.00119247	0.0152406	0.0119383	ITGB1/ACSL3/SPTBN1/ATP2C1/ZDHHC2/PGRMC1/PRKCI/KIF5B/EZR/PDPK1/RER1	11
GO:0045927	BP	GO:0045927	positive regulation of growth	27/1057	256/18800	0.00126998	0.0161923	0.0126838	SFRP1/ERBB4/CXCL12/INSR/VEGFA/PPIB/PROX1/ERBB2/AGRN/TEAD1/PLCB1/NEDD4L/HPN/MACF1/ADAM10/IST1/GOLGA4/FGF9/YAP1/NIPBL/ADNP/TFCP2L1/EZR/MEF2C/EIF4G1/CDC42/DDX3X	27
GO:0098732	BP	GO:0098732	macromolecule deacylation	17/1057	133/18800	0.00127862	0.0162633	0.0127394	VEGFA/PRKAA2/SREBF1/RBBP4/SFPQ/TBL1XR1/FLNA/KDM5A/CTBP1/DYRK1A/PPT1/NIPBL/PRKD1/ABHD17C/PRKAA1/CHD4/REST	17
GO:1902903	BP	GO:1902903	regulation of supramolecular fiber organization	36/1057	376/18800	0.00130792	0.0165659	0.0129765	APP/SFRP1/CXCL12/SDC4/CGNL1/AKAP9/SPTBN1/CYFIP2/OCLN/CD47/SCIN/HSPA1B/PROX1/NCKAP1/PLEKHH2/CLIP1/LIMCH1/SPTAN1/FLNA/TAOK1/HIP1R/RICTOR/ADD3/CARMIL1/PHLDB2/DYRK1A/TACSTD2/TJP1/ARHGAP35/ARHGAP6/ABI2/ARFGEF1/RDX/CDC42/WDR1/HSPA1A	36
GO:0007492	BP	GO:0007492	endoderm development	12/1057	78/18800	0.00130866	0.0165659	0.0129765	CTNNB1/COL6A1/ZFP36L1/DUSP1/COL4A2/ITGAV/LAMB1/BPTF/ITGB5/SETD2/EPB41L5/SMAD2	12
GO:0021543	BP	GO:0021543	pallium development	20/1057	169/18800	0.00132482	0.0167306	0.0131054	CTNNB1/RTN4/NTRK2/SYNE2/PROX1/ADGRG1/PLCB1/POU3F3/LAMB1/OGDH/IGF1R/ZMIZ1/SUN1/SLC38A2/TRA2B/BTG2/TENT2/NF1/HIF1A/EMX2	20
GO:0010638	BP	GO:0010638	positive regulation of organelle organization	44/1057	487/18800	0.00132919	0.0167331	0.0131074	EGF/SFRP1/CTNNB1/SDC4/LMAN1/INSR/AKAP9/OCLN/CD47/PPARGC1A/SCIN/HSPA1B/PROX1/ATRX/SFPQ/PLCB1/NCKAP1/CLIP1/C2CD5/LIMCH1/TASOR/HIP1R/PHIP/RAB3GAP1/RICTOR/TNKS2/G3BP1/CARMIL1/SDC1/GRN/MAPK1/ATF7IP/SURF4/DYNC1H1/RAD21/ARHGAP35/HIF1A/PDCD6IP/ABI2/TMED9/CNOT6L/CDC42/WDR1/HSPA1A	44
GO:0043588	BP	GO:0043588	skin development	30/1057	296/18800	0.00133334	0.0167331	0.0131074	CTNNB1/ZFP36L1/LGR4/SRSF6/JAG1/ARRDC3/ZFP36/ZMPSTE24/FZD6/ITGA6/ACVR1B/FLNB/ASH1L/ITGA2/LAMA5/DSP/ITGB6/JUP/SOSTDC1/ZDHHC21/ASAH1/MYSM1/YAP1/CLDN4/NF1/TFAP2B/UGCG/AP3B1/PDGFA/FOXQ1	30
GO:0010559	BP	GO:0010559	regulation of glycoprotein biosynthetic process	10/1057	58/18800	0.00134079	0.0167331	0.0131074	ITM2B/TMEM59/TM9SF2/CTNNB1/BACE2/PLCB1/ITM2C/TCF7L2/PAWR/ARFGEF1	10
GO:0022029	BP	GO:0022029	telencephalon cell migration	10/1057	58/18800	0.00134079	0.0167331	0.0131074	CXCL12/CTNNB1/RTN4/SYNE2/ADGRG1/POU3F3/LAMB1/OGDH/ZMIZ1/SUN1	10
GO:0061005	BP	GO:0061005	cell differentiation involved in kidney development	10/1057	58/18800	0.00134079	0.0167331	0.0131074	CTNNB1/LGR4/JAG1/IQGAP1/POU3F3/PAX2/SALL1/YAP1/MEF2C/STAT1	10
GO:0008202	BP	GO:0008202	steroid metabolic process	32/1057	323/18800	0.00136631	0.0169979	0.0133148	ATP1A1/APP/SPP1/IGFBP7/CYP1B1/PBX1/ABCA5/PROX1/EGR1/PRKAA2/HSD11B2/SREBF1/ABCD3/OSBPL3/PRLR/SF1/IGF1R/HMGCR/ERLIN2/LBR/LGMN/LIPA/CYB5R3/ASAH1/CUBN/ACADVL/NFE2L1/CYP51A1/HSD17B12/MBTPS1/PRKAA1/REST	32
GO:0031532	BP	GO:0031532	actin cytoskeleton reorganization	15/1057	111/18800	0.00137361	0.0169979	0.0133148	ATP2C1/MKLN1/CXADR/THSD7A/FLNA/CLDN19/RICTOR/CARMIL1/EZR/TJP1/CLDN3/MYH9/NRK/NEDD9/CDC42	15
GO:0007039	BP	GO:0007039	protein catabolic process in the vacuole	6/1057	23/18800	0.00137483	0.0169979	0.0133148	CD81/TMEM106B/LAMP2/VPS13A/LAPTM4B/DPP7	6
GO:0016338	BP	GO:0016338	calcium-independent cell-cell adhesion via plasma membrane cell-adhesion molecules	6/1057	23/18800	0.00137483	0.0169979	0.0133148	CLDN16/CLDN10/CLDN19/CLDN4/CLDN3/CLDN7	6
GO:0043467	BP	GO:0043467	regulation of generation of precursor metabolites and energy	17/1057	134/18800	0.00138953	0.0171397	0.0134259	APP/PPP1CB/INSR/GCGR/PPARGC1A/PRKAA2/OGT/SELENOS/SLC4A4/EPM2AIP1/AK4/HIF1A/ZBTB20/NCOR1/IFNAR1/STAT3/PRKAA1	17
GO:0010720	BP	GO:0010720	positive regulation of cell development	30/1057	297/18800	0.0014057	0.0172989	0.0135506	CALR/NPTN/CXCL12/CTNNB1/PLXNB1/VEGFA/NTRK2/OBSL1/PLXNB2/IL6ST/MAN2A1/SPINT1/DICER1/MACF1/PRKDC/UFL1/FLNA/IST1/GOLGA4/PRKCI/P4HB/CARMIL1/ADNP/DOCK1/CAPRIN1/HIF1A/NEDD9/RAB21/CDC42/METRN	30
GO:0051403	BP	GO:0051403	stress-activated MAPK cascade	26/1057	245/18800	0.001416	0.0173853	0.0136183	APP/SFRP1/MECOM/ZFP36L1/HACD3/CASR/VEGFA/HIPK2/ZFP36/DUSP1/PLCB1/IGF1R/HIPK3/TAOK1/EMC10/MAPK1/GADD45B/PJA2/ARL6IP5/EZR/MFHAS1/MAP4K3/XIAP/NCOR1/CDC42/ATF2	26
GO:0031214	BP	GO:0031214	biomineral tissue development	20/1057	170/18800	0.00142415	0.017445	0.013665	SPP1/TMEM38B/LGR4/GPC3/FGFR3/NELL1/ZMPSTE24/ATP2B1/GAS6/SLC20A1/ITGB6/PTH1R/SGMS2/SLC4A2/LTBP3/ANO6/KL/MEF2C/HIF1A/WDR72	20
GO:0072599	BP	GO:0072599	establishment of protein localization to endoplasmic reticulum	9/1057	49/18800	0.00145578	0.0177914	0.0139363	MAN1A1/SPCS2/TRAM1/HSPA5/SEC63/SPCS3/RAB3GAP1/HERPUD1/SEC62	9
GO:0051216	BP	GO:0051216	cartilage development	22/1057	195/18800	0.00146772	0.0178961	0.0140184	CTNNB1/CREB3L2/SCIN/FGFR3/HOXB3/ZMPSTE24/GLG1/PTH1R/PBXIP1/SOX6/MBOAT2/LTBP3/FGF9/TRIP11/SMAD5/MAF/ITGB8/MEF2C/HIF1A/HOXA5/ATF2/DDRGK1	22
GO:0030866	BP	GO:0030866	cortical actin cytoskeleton organization	8/1057	40/18800	0.00149486	0.0181021	0.0141797	CALR/AKAP11/NCKAP1/EZR/EPB41L3/PDCD6IP/LLGL2/RHOQ	8
GO:0035329	BP	GO:0035329	hippo signaling	8/1057	40/18800	0.00149486	0.0181021	0.0141797	TEAD1/SHANK2/AMOTL2/YAP1/PJA2/TIAL1/WWC1/WWC2	8
GO:0072210	BP	GO:0072210	metanephric nephron development	8/1057	40/18800	0.00149486	0.0181021	0.0141797	CTNNB1/LGR4/EGR1/PKD2/PAX2/SALL1/TFAP2B/STAT1	8
GO:0021987	BP	GO:0021987	cerebral cortex development	15/1057	112/18800	0.00150548	0.0181892	0.014248	CTNNB1/RTN4/NTRK2/SYNE2/ADGRG1/PLCB1/POU3F3/LAMB1/ZMIZ1/SUN1/SLC38A2/TRA2B/NF1/HIF1A/EMX2	15
GO:0045637	BP	GO:0045637	regulation of myeloid cell differentiation	23/1057	208/18800	0.00151698	0.0182865	0.0143242	SFRP1/FOS/CTNNB1/ZFP36L1/SCIN/JAG1/HSPA1B/ZFP36/ACVR1B/PRKDC/NDFIP1/FOXP1/KITLG/NF1/CUL4A/P4HTM/MEF2C/HIF1A/PURB/HOXA5/STAT3/STAT1/HSPA1A	23
GO:0070830	BP	GO:0070830	bicellular tight junction assembly	11/1057	69/18800	0.00152792	0.0183766	0.0143948	CLDN16/OCLN/CLDN10/CLDN19/AFDN/CLDN4/TJP1/CLDN3/CLDN7/PDCD6IP/MARVELD2	11
GO:0007596	BP	GO:0007596	blood coagulation	24/1057	221/18800	0.001553	0.0186361	0.014598	CD9/KNG1/PLAU/LMAN1/CD59/THBS1/IL6ST/FZD6/SERPING1/TSPAN8/GAS6/ITGA2/GNAQ/FLNA/VCL/AK3/JMJD1C/ANO6/PAPSS2/MYH9/TFPI/AP3B1/PDGFA/VKORC1	24
GO:0046683	BP	GO:0046683	response to organophosphorus	16/1057	124/18800	0.00158642	0.0188626	0.0147755	APP/HSP90B1/BSG/FOS/CYP1B1/ZFP36L1/AKAP9/FOSB/ITPR2/SREBF1/PKD2/HSPA5/SDC1/EZR/BIRC2/STAT1	16
GO:1904375	BP	GO:1904375	regulation of protein localization to cell periphery	16/1057	124/18800	0.00158642	0.0188626	0.0147755	TMEM59/ITGB1/ACSL3/SPTBN1/ATP2C1/CLTC/HECTD1/ADAM10/ZDHHC2/PGRMC1/PRKCI/KIF5B/EZR/PDPK1/RER1/RHOQ	16
GO:0002934	BP	GO:0002934	desmosome organization	4/1057	10/18800	0.00158733	0.0188626	0.0147755	DSG2/DSP/JUP/PERP	4
GO:1902946	BP	GO:1902946	protein localization to early endosome	4/1057	10/18800	0.00158733	0.0188626	0.0147755	EGF/SORL1/EZR/RDX	4
GO:0006163	BP	GO:0006163	purine nucleotide metabolic process	37/1057	394/18800	0.00159322	0.0188626	0.0147755	APP/ATP6V0C/INSR/ACSL3/ATP6V1A/ACSL4/PPARGC1A/PRKAA2/NME3/OGDHL/TPST2/OGT/ACSL1/NUDT4/OGDH/HMGCR/PANK3/SLC4A4/ACSS1/AK3/PPT1/PFKL/AK4/TECR/MCCC2/PAPSS2/HSD17B12/FAR1/HIF1A/ZBTB20/DLD/NCOR1/STAT3/PRKAA1/OPA1/CASK/RHOQ	37
GO:0019693	BP	GO:0019693	ribose phosphate metabolic process	37/1057	394/18800	0.00159322	0.0188626	0.0147755	APP/ATP6V0C/INSR/ACSL3/ATP6V1A/ACSL4/PPARGC1A/PRKAA2/NME3/OGDHL/TPST2/OGT/ACSL1/NUDT4/OGDH/HMGCR/PANK3/SLC4A4/ACSS1/AK3/PPT1/PFKL/AK4/TECR/MCCC2/PAPSS2/HSD17B12/FAR1/HIF1A/ZBTB20/DLD/NCOR1/STAT3/PRKAA1/OPA1/CASK/RHOQ	37
GO:0001570	BP	GO:0001570	vasculogenesis	12/1057	80/18800	0.00163797	0.0193062	0.0151229	CTNNB1/ZFP36L1/JUNB/VEGFA/NTRK2/ITGAV/ZMIZ1/YAP1/SETD2/ITGB8/RIN2/QKI	12
GO:0008306	BP	GO:0008306	associative learning	12/1057	80/18800	0.00163797	0.0193062	0.0151229	APP/FOS/NPTN/ITGB1/SHANK2/HMGCR/PGRMC1/LGMN/BTG2/PPT1/NF1/HIF1A	12
GO:0110148	BP	GO:0110148	biomineralization	20/1057	172/18800	0.00164193	0.01931	0.0151259	SPP1/TMEM38B/LGR4/GPC3/FGFR3/NELL1/ZMPSTE24/ATP2B1/GAS6/SLC20A1/ITGB6/PTH1R/SGMS2/SLC4A2/LTBP3/ANO6/KL/MEF2C/HIF1A/WDR72	20
GO:1901570	BP	GO:1901570	fatty acid derivative biosynthetic process	9/1057	50/18800	0.00168829	0.0197392	0.0154621	ACSL3/ACSL4/ACSL1/PAM/GGT6/PPT1/TECR/HSD17B12/FAR1	9
GO:0045070	BP	GO:0045070	positive regulation of viral genome replication	7/1057	32/18800	0.00169704	0.0197392	0.0154621	HACD3/PKN2/DDB1/TOP2B/ADAR/LARP1/DDX3X	7
GO:0055075	BP	GO:0055075	potassium ion homeostasis	7/1057	32/18800	0.00169704	0.0197392	0.0154621	ATP1A1/ATP1B1/SLC12A1/KCNJ10/ATP1B2/ATP1B3/TFAP2B	7
GO:0060674	BP	GO:0060674	placenta blood vessel development	7/1057	32/18800	0.00169704	0.0197392	0.0154621	TMED2/JUNB/PKD2/NR2F2/SPINT1/MAPK1/ITGB8	7
GO:0071711	BP	GO:0071711	basement membrane organization	7/1057	32/18800	0.00169704	0.0197392	0.0154621	ITGB1/SPINT2/HPN/NTN4/LAMB1/PHLDB2/COL4A1	7
GO:0002573	BP	GO:0002573	myeloid leukocyte differentiation	23/1057	210/18800	0.00172122	0.0198382	0.0155397	APP/SFRP1/CD81/FOS/CTNNB1/ZFP36L1/JUNB/VEGFA/GPC3/ATP6AP1/ITGB6/NDFIP1/FOXP1/JUN/LBR/KITLG/NF1/CUL4A/ITGB8/MYH9/SP3/CDC42/AP3B1	23
GO:0006487	BP	GO:0006487	protein N-linked glycosylation	11/1057	70/18800	0.00172253	0.0198382	0.0155397	MAGT1/MGAT4A/STT3B/RPN1/KRTCAP2/RPN2/TMEM165/TUSC3/B4GALT1/GFPT1/MLEC	11
GO:0060485	BP	GO:0060485	mesenchyme development	30/1057	301/18800	0.00173026	0.0198382	0.0155397	SFRP1/DDX17/ERBB4/CTNNB1/RTN4/SEMA6D/ZFP36L1/MDM4/JAG1/LRP6/PKD2/FOLR1/HPN/LAMA5/TASOR/FLNA/PAX2/FGF9/KITLG/PHLDB2/MAPK1/YAP1/TCF7L2/MEF2C/HIF1A/HOXA5/EPB41L5/CDC42/SMAD2/STAT1	30
GO:0039531	BP	GO:0039531	regulation of viral-induced cytoplasmic pattern recognition receptor signaling pathway	6/1057	24/18800	0.00174686	0.0198382	0.0155397	TSPAN6/PUM2/PUM1/ANKRD17/BIRC2/RIOK3	6
GO:0048745	BP	GO:0048745	smooth muscle tissue development	6/1057	24/18800	0.00174686	0.0198382	0.0155397	PROX1/MYLK/PKD2/NF1/ZFAND5/TFAP2B	6
GO:0072207	BP	GO:0072207	metanephric epithelium development	6/1057	24/18800	0.00174686	0.0198382	0.0155397	LGR4/PKD2/POU3F3/PAX2/YAP1/STAT1	6
GO:2000637	BP	GO:2000637	positive regulation of miRNA-mediated gene silencing	6/1057	24/18800	0.00174686	0.0198382	0.0155397	ZFP36/FMR1/PUM2/PUM1/STAT3/TIAL1	6
GO:0002753	BP	GO:0002753	cytoplasmic pattern recognition receptor signaling pathway	10/1057	60/18800	0.00175043	0.0198382	0.0155397	HSPA1B/TSPAN6/ERBIN/PUM2/PUM1/ANKRD17/XIAP/BIRC2/RIOK3/HSPA1A	10
GO:0006893	BP	GO:0006893	Golgi to plasma membrane transport	10/1057	60/18800	0.00175043	0.0198382	0.0155397	ACSL3/SPTBN1/ATP2C1/PREPL/ANK3/MACF1/GOLPH3/ARFGEF2/GOLGA4/GGA2	10
GO:0033866	BP	GO:0033866	nucleoside bisphosphate biosynthetic process	10/1057	60/18800	0.00175043	0.0198382	0.0155397	ACSL3/ACSL4/ACSL1/PANK3/ACSS1/PPT1/TECR/PAPSS2/HSD17B12/DLD	10
GO:0034030	BP	GO:0034030	ribonucleoside bisphosphate biosynthetic process	10/1057	60/18800	0.00175043	0.0198382	0.0155397	ACSL3/ACSL4/ACSL1/PANK3/ACSS1/PPT1/TECR/PAPSS2/HSD17B12/DLD	10
GO:0034033	BP	GO:0034033	purine nucleoside bisphosphate biosynthetic process	10/1057	60/18800	0.00175043	0.0198382	0.0155397	ACSL3/ACSL4/ACSL1/PANK3/ACSS1/PPT1/TECR/PAPSS2/HSD17B12/DLD	10
GO:0071772	BP	GO:0071772	response to BMP	20/1057	173/18800	0.00176103	0.0198734	0.0155672	SFRP1/CRIM1/SPINT2/HIPK2/SORL1/GPC3/EGR1/SPINT1/SLC33A1/TOB1/GDF15/SOSTDC1/SMAD5/USP9X/TRIM33/XIAP/TFAP2B/PPM1A/SMAD2/ATF2	20
GO:0071773	BP	GO:0071773	cellular response to BMP stimulus	20/1057	173/18800	0.00176103	0.0198734	0.0155672	SFRP1/CRIM1/SPINT2/HIPK2/SORL1/GPC3/EGR1/SPINT1/SLC33A1/TOB1/GDF15/SOSTDC1/SMAD5/USP9X/TRIM33/XIAP/TFAP2B/PPM1A/SMAD2/ATF2	20
GO:0072595	BP	GO:0072595	maintenance of protein localization in organelle	8/1057	41/18800	0.00176715	0.0199002	0.0155882	HSPA5/SUN1/HNRNPU/GPAA1/SYNE1/OS9/KDELR2/RER1	8
GO:0099111	BP	GO:0099111	microtubule-based transport	22/1057	198/18800	0.00178574	0.0200669	0.0157188	APP/SYNE2/LAMP1/DST/SFPQ/PCM1/SUN1/HNRNPU/PURA/LRPPRC/ARL8B/DYNC1H1/KIF5B/RHOT2/ARMCX3/HIF1A/OPA1/BICDL1/RAB21/CDC42/AP3B1/COPG1	22
GO:0120193	BP	GO:0120193	tight junction organization	12/1057	81/18800	0.00182654	0.020482	0.016044	CLDN16/OCLN/CLDN10/PATJ/CLDN19/AFDN/CLDN4/TJP1/CLDN3/CLDN7/PDCD6IP/MARVELD2	12
GO:0031058	BP	GO:0031058	positive regulation of histone modification	14/1057	103/18800	0.00185062	0.0207082	0.0162212	MUC1/CTNNB1/VEGFA/PPARGC1A/SREBF1/KMT2A/OGT/KANSL1/FMR1/CTBP1/NIPBL/KMT2E/PRKD1/NSD3	14
GO:1903828	BP	GO:1903828	negative regulation of protein localization	22/1057	199/18800	0.00190402	0.0212609	0.0166541	TMEM59/SFRP1/LMAN1/CLTC/SREBF1/HECTD1/NEDD4L/HMGCR/NDFIP1/NF1/PFKL/CYP51A1/OS9/MFHAS1/MAGED1/NDFIP2/ABHD17C/ERLEC1/LEPROT/REST/RHOQ/RAB11FIP3	22
GO:0007584	BP	GO:0007584	response to nutrient	18/1057	150/18800	0.00192981	0.0215036	0.0168443	SPP1/SFRP1/CYP1B1/CASR/IGFBP2/GCGR/LPL/ATP2B1/FOLR1/SHANK2/OGT/GAS6/ITGA2/ACSL1/IGF1R/AGL/KL/STAT1	18
GO:0010632	BP	GO:0010632	regulation of epithelial cell migration	29/1057	290/18800	0.00194646	0.0215148	0.016853	EGF/CALR/RTN4/THBS1/VEGFA/PTPRG/PROX1/PRCP/NR2F2/ITGA2/MACF1/FOXP1/JUN/JUP/EMC10/LGMN/GRN/NF1/TACSTD2/DOCK1/PRKD1/MEF2C/RIN2/SP1/HIF1A/EPB41L5/PDPK1/PIK3C2A/RHOB	29
GO:0015804	BP	GO:0015804	neutral amino acid transport	9/1057	51/18800	0.00194963	0.0215148	0.016853	SLC3A1/SERINC3/SLC38A2/SLC43A2/SLC38A1/SLC7A8/SLC1A5/SLC3A2/LLGL2	9
GO:0019083	BP	GO:0019083	viral transcription	9/1057	51/18800	0.00194963	0.0215148	0.016853	ZFP36/NUCKS1/HPN/JUN/RSF1/SP1/SMARCA4/REST/TARDBP	9
GO:0038065	BP	GO:0038065	collagen-activated signaling pathway	5/1057	17/18800	0.00195109	0.0215148	0.016853	COL4A3/COL4A2/ITGA2/DDR1/COL4A1	5
GO:0043923	BP	GO:0043923	positive regulation by host of viral transcription	5/1057	17/18800	0.00195109	0.0215148	0.016853	NUCKS1/HPN/JUN/SP1/SMARCA4	5
GO:0018107	BP	GO:0018107	peptidyl-threonine phosphorylation	15/1057	115/18800	0.00196623	0.0216367	0.0169485	EGF/APP/HIPK2/CLK1/ACVR1B/WNK1/PRKDC/HIPK3/HIPK1/MAPK1/DYRK1A/PRKD1/EIF4G1/PDPK1/ATF2	15
GO:0048524	BP	GO:0048524	positive regulation of viral process	10/1057	61/18800	0.0019902	0.0218551	0.0171196	HACD3/PKN2/FMR1/P4HB/DDB1/TOP2B/RSF1/ADAR/LARP1/DDX3X	10
GO:0001893	BP	GO:0001893	maternal placenta development	7/1057	33/18800	0.0020509	0.0223367	0.0174968	SPP1/BSG/TMED2/JUNB/NR2F2/ASH1L/CTSB	7
GO:0003382	BP	GO:0003382	epithelial cell morphogenesis	7/1057	33/18800	0.0020509	0.0223367	0.0174968	COL18A1/SPINT2/PKHD1/FLNB/FAT1/CLDN3/EPB41L5	7
GO:0036475	BP	GO:0036475	neuron death in response to oxidative stress	7/1057	33/18800	0.0020509	0.0223367	0.0174968	CTNNB1/LANCL1/ARL6IP5/OXR1/HIF1A/TBC1D24/REST	7
GO:0045648	BP	GO:0045648	positive regulation of erythrocyte differentiation	7/1057	33/18800	0.0020509	0.0223367	0.0174968	HSPA1B/ACVR1B/PRKDC/HIF1A/STAT3/STAT1/HSPA1A	7
GO:0098773	BP	GO:0098773	skin epidermis development	13/1057	93/18800	0.00205763	0.0223641	0.0175183	CTNNB1/LGR4/ZMPSTE24/FZD6/ACVR1B/LAMA5/SOSTDC1/ZDHHC21/MYSM1/NF1/AP3B1/PDGFA/FOXQ1	13
GO:0050817	BP	GO:0050817	coagulation	24/1057	226/18800	0.00209772	0.0227101	0.0177893	CD9/KNG1/PLAU/LMAN1/CD59/THBS1/IL6ST/FZD6/SERPING1/TSPAN8/GAS6/ITGA2/GNAQ/FLNA/VCL/AK3/JMJD1C/ANO6/PAPSS2/MYH9/TFPI/AP3B1/PDGFA/VKORC1	24
GO:0031330	BP	GO:0031330	negative regulation of cellular catabolic process	27/1057	265/18800	0.00209803	0.0227101	0.0177893	CST3/HIPK2/SORL1/SMG1/ZFP36/NELL1/OGT/TOB1/PLIN5/SEC22B/FMR1/HNRNPU/WDR6/TENT2/LRPPRC/SNRNP70/CTSA/LAPTM4B/EIF4G1/FUS/ELAVL1/STAT3/LARP1/WAC/SYNCRIP/TARDBP/DDRGK1	27
GO:0070302	BP	GO:0070302	regulation of stress-activated protein kinase signaling cascade	22/1057	201/18800	0.00216065	0.0230981	0.0180932	APP/SFRP1/MECOM/VEGFA/HIPK2/ZMPSTE24/DUSP1/PLCB1/IGF1R/HIPK3/TAOK1/RNF13/EMC10/MAPK1/GADD45B/PJA2/ARL6IP5/EZR/MFHAS1/XIAP/NCOR1/CDC42	22
GO:1901888	BP	GO:1901888	regulation of cell junction assembly	22/1057	201/18800	0.00216065	0.0230981	0.0180932	APP/SFRP1/SDC4/THBS1/VEGFA/NTRK2/PTPRA/AGRN/CLSTN1/SLK/MACF1/LIMCH1/VCL/CLDN19/PHLDB2/ADNP/TJP1/MEF2C/EIF4G1/CLDN3/ARHGAP6/EPB41L5	22
GO:0031056	BP	GO:0031056	regulation of histone modification	20/1057	176/18800	0.00216318	0.0230981	0.0180932	MUC1/CTNNB1/VEGFA/PPARGC1A/SREBF1/ATRX/ZMPSTE24/KMT2A/OGT/KANSL1/FMR1/MLLT6/KDM5A/CTBP1/NIPBL/ZNF451/KMT2E/PRKD1/TRIP12/NSD3	20
GO:0001558	BP	GO:0001558	regulation of cell growth	38/1057	415/18800	0.00217211	0.0230981	0.0180932	SPP1/SFRP1/CXCL12/IGFBP7/RTN4/SEMA6D/VEGFA/KIAA1109/HSPA1B/ERBB2/TEAD1/SMARCA2/CLSTN1/ACVR1B/PAPPA2/NEDD4L/HPN/MACF1/DDR1/ADAM10/IST1/BST2/GOLGA4/RYK/YAP1/PPT1/ADNP/EPB41L3/EIF4G1/JADE1/SMARCA4/PPP2R1A/RAB21/CDC42/DDX3X/DPYSL2/SPAG9/HSPA1A	38
GO:0030330	BP	GO:0030330	DNA damage response, signal transduction by p53 class mediator	11/1057	72/18800	0.00217245	0.0230981	0.0180932	MUC1/MDM4/HIPK2/ATRX/ZMPSTE24/PTTG1IP/MYO6/DYRK1A/RPS6KA6/SOX4/NDRG1	11
GO:1903036	BP	GO:1903036	positive regulation of response to wounding	11/1057	72/18800	0.00217245	0.0230981	0.0180932	ITGB1/OCLN/THBS1/MYLK/IGF1R/FLNA/GRN/CLDN4/ANO6/CLDN3/ARFGEF1	11
GO:0009081	BP	GO:0009081	branched-chain amino acid metabolic process	6/1057	25/18800	0.00219049	0.0230981	0.0180932	ILVBL/MCCC2/BCKDHA/DLD/ALDH6A1/ACADSB	6
GO:0035336	BP	GO:0035336	long-chain fatty-acyl-CoA metabolic process	6/1057	25/18800	0.00219049	0.0230981	0.0180932	ACSL3/ACSL4/ACSL1/TECR/HSD17B12/FAR1	6
GO:0046949	BP	GO:0046949	fatty-acyl-CoA biosynthetic process	6/1057	25/18800	0.00219049	0.0230981	0.0180932	ACSL3/ACSL4/ACSL1/PPT1/TECR/HSD17B12	6
GO:0051647	BP	GO:0051647	nucleus localization	6/1057	25/18800	0.00219049	0.0230981	0.0180932	SYNE2/CLMN/PCM1/SUN1/DYNC1H1/CDC42	6
GO:0060148	BP	GO:0060148	positive regulation of post-transcriptional gene silencing	6/1057	25/18800	0.00219049	0.0230981	0.0180932	ZFP36/FMR1/PUM2/PUM1/STAT3/TIAL1	6
GO:0072273	BP	GO:0072273	metanephric nephron morphogenesis	6/1057	25/18800	0.00219049	0.0230981	0.0180932	CTNNB1/LGR4/PKD2/PAX2/SALL1/STAT1	6
GO:1900370	BP	GO:1900370	positive regulation of post-transcriptional gene silencing by RNA	6/1057	25/18800	0.00219049	0.0230981	0.0180932	ZFP36/FMR1/PUM2/PUM1/STAT3/TIAL1	6
GO:0009952	BP	GO:0009952	anterior/posterior pattern specification	23/1057	214/18800	0.00220085	0.0231613	0.0181427	SFRP1/WLS/CTNNB1/TMED2/HIPK2/GPC3/PBX1/HOXB3/LRP6/MIB1/ATP6AP2/NR2F2/BHLHE40/PRKDC/BPTF/TASOR/BTG2/HIPK1/EMX2/HOXA5/EPB41L5/SMAD2/HES4	23
GO:0035637	BP	GO:0035637	multicellular organismal signaling	19/1057	164/18800	0.00221003	0.0232119	0.0181823	ATP1A1/ATP1B1/AKAP9/NTRK2/DSG2/ZMPSTE24/ATP2A2/ANK3/ATP2B1/ATP1B2/ITGA2/DSP/CXADR/ANK2/FMR1/FLNA/JUP/CLDN19/MEF2A	19
GO:0007599	BP	GO:0007599	hemostasis	24/1057	227/18800	0.00222425	0.0232796	0.0182354	CD9/KNG1/PLAU/LMAN1/CD59/THBS1/IL6ST/FZD6/SERPING1/TSPAN8/GAS6/ITGA2/GNAQ/FLNA/VCL/AK3/JMJD1C/ANO6/PAPSS2/MYH9/TFPI/AP3B1/PDGFA/VKORC1	24
GO:0016050	BP	GO:0016050	vesicle organization	30/1057	306/18800	0.00222526	0.0232796	0.0182354	RNASEK/SDC4/TMED2/TBC1D4/CLCN3/TMED10/SORT1/AP1G1/TMEM9/C2CD5/SAR1A/GOLPH3/ARFGEF2/SEC22B/IST1/STX16/ZDHHC2/PRKCI/SCARB2/YIPF4/SDC1/ARL8B/LAPTM4B/ZFYVE16/SAR1B/PDCD6IP/TMED9/SEC31A/YIPF5/AP3B1	30
GO:0009749	BP	GO:0009749	response to glucose	21/1057	189/18800	0.0022424	0.0234128	0.0183397	THBS1/CASR/LPL/COL4A3/EGR1/PRKAA2/SREBF1/GAS6/IGF1R/SELENOS/PAX2/TRA2B/PFKL/TCF7L2/HIF1A/ZBTB20/SMARCA4/PRKAA1/SOX4/STXBP4/SMAD2	21
GO:0060395	BP	GO:0060395	SMAD protein signal transduction	12/1057	83/18800	0.00225723	0.0235213	0.0184248	FOS/SPTBN1/LNPEP/HIPK2/SLC33A1/TOB1/ITGB6/ZMIZ1/GDF15/JUN/SMAD5/SMAD2	12
GO:1904035	BP	GO:1904035	regulation of epithelial cell apoptotic process	13/1057	94/18800	0.0022678	0.0235851	0.0184747	ZFP36L1/THBS1/SRSF6/PKHD1/ZFP36/GAS6/IGF1R/PRKCI/YAP1/ANO6/TCF7L2/PRKAA1/PDPK1	13
GO:0050767	BP	GO:0050767	regulation of neurogenesis	34/1057	361/18800	0.00229974	0.0238705	0.0186982	SPP1/NPTN/CXCL12/CTNNB1/RTN4/SEMA6D/PLXNB1/VEGFA/NTRK2/SORL1/OBSL1/PLXNB2/HOXB3/IL6ST/MAN2A1/BHLHE40/SPINT1/DICER1/PCM1/MACF1/UFL1/IST1/GOLGA4/PRKCI/RYK/YAP1/ADNP/NF1/CAPRIN1/HIF1A/CERS2/RAB21/REST/METRN	34
GO:0035725	BP	GO:0035725	sodium ion transmembrane transport	20/1057	177/18800	0.00231338	0.0239651	0.0187724	ATP1A1/ATP1B1/SLC12A1/SCNN1A/WNK4/ACTN4/PKD2/ANK3/NEDD4L/ATP1B2/WNK1/FXYD2/UTRN/SLC20A1/SLC6A8/KLHL24/SLC4A4/ANO6/ATP1B3/SLC3A2	20
GO:0036363	BP	GO:0036363	transforming growth factor beta activation	4/1057	11/18800	0.0023839	0.0245518	0.019232	ITGAV/ITGB6/LTBP3/ITGB8	4
GO:0036490	BP	GO:0036490	regulation of translation in response to endoplasmic reticulum stress	4/1057	11/18800	0.0023839	0.0245518	0.019232	TMED2/DNAJC3/EIF4G1/DDX3X	4
GO:1905050	BP	GO:1905050	positive regulation of metallopeptidase activity	4/1057	11/18800	0.0023839	0.0245518	0.019232	CLDN4/CLDN3/STAT3/DDRGK1	4
GO:0048754	BP	GO:0048754	branching morphogenesis of an epithelial tube	18/1057	153/18800	0.002406	0.0247315	0.0193727	EGF/CTNNB1/LGR4/CASR/VEGFA/PKHD1/GPC3/PBX1/PKD2/LAMA5/DDR1/PAX2/SALL1/YAP1/COL4A1/TACSTD2/MAGED1/HOXA5	18
GO:0006903	BP	GO:0006903	vesicle targeting	8/1057	43/18800	0.00242834	0.0248647	0.019477	TMED2/TMED10/SAR1A/WDR11/TRIP11/FAM91A1/SAR1B/TMED9	8
GO:0071364	BP	GO:0071364	cellular response to epidermal growth factor stimulus	8/1057	43/18800	0.00242834	0.0248647	0.019477	ERBB4/ZFP36L1/ERBB2/ZFP36/IQGAP1/PAX2/PDPK1/ZFP36L2	8
GO:0006090	BP	GO:0006090	pyruvate metabolic process	14/1057	106/18800	0.00243357	0.0248703	0.0194814	APP/INSR/PRKAA2/OGDHL/OGT/OGDH/SLC4A4/PFKL/HIF1A/ZBTB20/DLD/NCOR1/STAT3/PRKAA1	14
GO:0006476	BP	GO:0006476	protein deacetylation	15/1057	118/18800	0.00253873	0.0258951	0.0202842	VEGFA/PRKAA2/SREBF1/RBBP4/SFPQ/TBL1XR1/FLNA/KDM5A/CTBP1/DYRK1A/NIPBL/PRKD1/PRKAA1/CHD4/REST	15
GO:0070059	BP	GO:0070059	intrinsic apoptotic signaling pathway in response to endoplasmic reticulum stress	10/1057	63/18800	0.00254906	0.0259024	0.0202899	TMBIM6/ITPR1/GRINA/DNAJC10/SERINC3/SELENOS/HYOU1/HERPUD1/OPA1/HSPA1A	10
GO:0048872	BP	GO:0048872	homeostasis of number of cells	28/1057	282/18800	0.00255505	0.0259024	0.0202899	ZFP36L1/LGR4/VEGFA/HIPK2/HSPA1B/ZFP36/ADGRG1/ACVR1B/PRKDC/UFL1/LIPA/KITLG/SMAD5/KMT2E/P4HTM/MEF2C/HIF1A/MFHAS1/ADAR/HOXA5/SP3/STAT3/OCIAD1/PTBP3/SOX4/AP3B1/STAT1/HSPA1A	28
GO:0006979	BP	GO:0006979	response to oxidative stress	39/1057	433/18800	0.00256158	0.0259024	0.0202899	APP/FOS/CTNNB1/CYP1B1/PPARGC1A/HSPA1B/CPEB2/PRKAA2/PKD2/ATP2A2/SFPQ/ERMP1/MYEF2/LANCL1/JUN/SELENOS/PAX2/SETX/P4HB/SDC1/MAPK1/ARL6IP5/NFE2L1/DAPK1/OXR1/PRKD1/PPP2CB/SOD3/SP1/HIF1A/UBE3A/PAWR/PRKAA1/TBC1D24/REST/STAT1/ATF2/RHOB/HSPA1A	39
GO:0050808	BP	GO:0050808	synapse organization	38/1057	419/18800	0.00256474	0.0259024	0.0202899	APP/ERBB4/NPTN/CTNNB1/INSR/PLXNB1/NTRK2/OBSL1/ERBB2/PLXNB2/CDH1/ANK3/AGRN/CLSTN1/SHANK2/SDF4/IGF1R/ADAM10/FLNA/ZDHHC2/PGRMC1/LGMN/RYK/NFIA/MESD/ADNP/COL4A1/MEF2C/CAPRIN1/EIF4G1/SLC25A46/UBE3A/ABHD17C/ABI2/REST/CDC42/RER1/YWHAZ	38
GO:0043620	BP	GO:0043620	regulation of DNA-templated transcription in response to stress	9/1057	53/18800	0.00256876	0.0259024	0.0202899	MUC1/TMBIM6/VEGFA/EGR1/HSPA5/JUN/BCLAF1/HIF1A/HSPA1A	9
GO:0071385	BP	GO:0071385	cellular response to glucocorticoid stimulus	9/1057	53/18800	0.00256876	0.0259024	0.0202899	CYP1B1/ZFP36L1/ZFP36/ATP2B1/IGF1R/HNRNPU/KLF9/REST/ZFP36L2	9
GO:0060965	BP	GO:0060965	negative regulation of miRNA-mediated gene silencing	5/1057	18/18800	0.00257767	0.025943	0.0203217	NEAT1/ZMPSTE24/KCNQ1OT1/NCOR1/ELAVL1	5
GO:0055123	BP	GO:0055123	digestive system development	17/1057	142/18800	0.00260565	0.0261749	0.0205034	SFRP1/WLS/CTNNB1/INSR/LGR4/IL6ST/SLC4A2/HIP1R/FGF9/SALL1/YAP1/NIPBL/RARRES2/HIF1A/HOXA5/EPB41L5/SMAD2	17
GO:0021700	BP	GO:0021700	developmental maturation	29/1057	296/18800	0.00263589	0.0264287	0.0207022	APP/CTNNB1/PLXNB1/VEGFA/CLCN3/FGFR3/AGRN/ATP6AP2/CLN5/CLSTN1/NTN4/DEFB1/AP1G1/PTH1R/RERE/CD63/ZDHHC2/PAX2/NFIA/ANKRD17/NF1/TFCP2L1/HIF1A/DLD/PPP2R1A/HOXA5/PTBP3/TUT4/YWHAZ	29
GO:1901342	BP	GO:1901342	regulation of vasculature development	33/1057	351/18800	0.00271919	0.0272124	0.0213161	SFRP1/CTNNB1/CYP1B1/ITGB1/THBS1/VEGFA/HIPK2/COL4A3/ERBB2/GPNMB/MTDH/COL4A2/ADAM10/TSPAN12/JUP/EMC10/DDAH1/HIPK1/GRN/GTF2I/NF1/PRKD1/TJP1/ITGB8/SP1/HIF1A/MYDGF/HOXA5/STAT3/PDPK1/STAT1/ATF2/RHOB	33
GO:0110053	BP	GO:0110053	regulation of actin filament organization	27/1057	270/18800	0.00273218	0.0272909	0.0213776	SFRP1/CXCL12/SDC4/CGNL1/SPTBN1/CYFIP2/CD47/SCIN/NCKAP1/PLEKHH2/LIMCH1/SPTAN1/FLNA/HIP1R/RICTOR/ADD3/CARMIL1/PHLDB2/TACSTD2/TJP1/ARHGAP35/ARHGAP6/ABI2/ARFGEF1/RDX/CDC42/WDR1	27
GO:0010769	BP	GO:0010769	regulation of cell morphogenesis involved in differentiation	13/1057	96/18800	0.00274111	0.0273287	0.0214071	CALR/ACTN4/OBSL1/PRKDC/FLNA/P4HB/CARMIL1/TACSTD2/DOCK1/CAPRIN1/NEDD9/RAB21/CDC42	13
GO:0051897	BP	GO:0051897	positive regulation of protein kinase B signaling	15/1057	119/18800	0.00275774	0.0274429	0.0214966	EGF/RTN4/INSR/ITGB1/THBS1/MTDH/GAS6/IGF1R/HIP1/GDF15/RICTOR/TCF7L2/MFHAS1/MYDGF/PDGFA	15
GO:0010595	BP	GO:0010595	positive regulation of endothelial cell migration	16/1057	131/18800	0.00280361	0.0278471	0.0218132	EGF/CALR/THBS1/VEGFA/PROX1/FOXP1/EMC10/LGMN/GRN/PRKD1/RIN2/SP1/HIF1A/PDPK1/PIK3C2A/RHOB	16
GO:0021795	BP	GO:0021795	cerebral cortex cell migration	8/1057	44/18800	0.00282436	0.0278965	0.0218519	CTNNB1/RTN4/SYNE2/ADGRG1/POU3F3/LAMB1/ZMIZ1/SUN1	8
GO:0045981	BP	GO:0045981	positive regulation of nucleotide metabolic process	8/1057	44/18800	0.00282436	0.0278965	0.0218519	APP/INSR/PPARGC1A/PRKAA2/SLC4A4/HIF1A/ZBTB20/PRKAA1	8
GO:1900544	BP	GO:1900544	positive regulation of purine nucleotide metabolic process	8/1057	44/18800	0.00282436	0.0278965	0.0218519	APP/INSR/PPARGC1A/PRKAA2/SLC4A4/HIF1A/ZBTB20/PRKAA1	8
GO:0040014	BP	GO:0040014	regulation of multicellular organism growth	10/1057	64/18800	0.00287212	0.0283154	0.0221801	APP/PPIB/ZMPSTE24/NPY1R/GDF15/LGMN/TNKS2/NIPBL/EZR/STAT3	10
GO:0009746	BP	GO:0009746	response to hexose	21/1057	193/18800	0.00288849	0.028424	0.0222651	THBS1/CASR/LPL/COL4A3/EGR1/PRKAA2/SREBF1/GAS6/IGF1R/SELENOS/PAX2/TRA2B/PFKL/TCF7L2/HIF1A/ZBTB20/SMARCA4/PRKAA1/SOX4/STXBP4/SMAD2	21
GO:1903362	BP	GO:1903362	regulation of cellular protein catabolic process	26/1057	258/18800	0.00291683	0.0286498	0.022442	EGF/CD81/HIPK2/HSPA1B/NELL1/HECTD1/BCAP31/PTTG1IP/XPO1/OGT/CTSC/TMEM259/UFL1/FMR1/LAPTM4B/ZYG11B/ANKIB1/EZR/HERPUD1/FBXL5/UBE3A/WAC/RDX/CSNK1A1/DDRGK1/HSPA1A	26
GO:0061564	BP	GO:0061564	axon development	42/1057	479/18800	0.002938	0.0288043	0.0225631	APLP2/APP/SPP1/BSG/NPTN/CXCL12/RTN4/SEMA6D/ITGB1/PLXNB1/VEGFA/NTRK2/ERBB2/PLXNB2/ANK3/FOLR1/B3GNT2/LAMA5/CHL1/MACF1/IGF1R/DDR1/JUN/FLNA/IST1/VCL/PGRMC1/GOLGA4/PAX2/RYK/GRN/ADNP/KIF5B/USP9X/TOP2B/USP33/ARHGAP35/SLC25A46/CERS2/RAB21/DPYSL2/METRN	42
GO:0071805	BP	GO:0071805	potassium ion transmembrane transport	23/1057	219/18800	0.00295586	0.028926	0.0226583	ATP1A1/ATP1B1/SLC12A1/KCNJ16/AKAP9/ITGB1/TMEM38B/WNK4/KCNJ1/PKD2/ANK3/NEDD4L/HPN/KCNJ10/ATP1B2/WNK1/FXYD2/ANK2/FLNA/CD63/KLHL24/ANO6/ATP1B3	23
GO:1900542	BP	GO:1900542	regulation of purine nucleotide metabolic process	12/1057	86/18800	0.00305553	0.0298463	0.0233793	APP/INSR/PPARGC1A/PRKAA2/OGT/SLC4A4/AK4/HIF1A/ZBTB20/NCOR1/STAT3/PRKAA1	12
GO:0043270	BP	GO:0043270	positive regulation of ion transport	27/1057	273/18800	0.00318586	0.0309617	0.024253	ATP1B1/CXCL12/AKAP9/ITGB1/CASR/WNK4/ACTN4/MYLK/PKD2/ANK3/PRSS8/ARL6IP1/ATP2B1/ATP1B2/WNK1/FXYD2/VMP1/ANK2/FLNA/MLLT6/RAB3GAP1/ANO6/KIF5B/ATP1B3/AHCYL1/PDPK1/CASK	27
GO:0031960	BP	GO:0031960	response to corticosteroid	18/1057	157/18800	0.00319051	0.0309617	0.024253	FOS/IGFBP7/CYP1B1/ZFP36L1/FOSB/IGFBP2/HSD11B2/ZFP36/ATP2B1/IGF1R/HNRNPU/GLB1/AGL/PAM/SDC1/KLF9/REST/ZFP36L2	18
GO:1903364	BP	GO:1903364	positive regulation of cellular protein catabolic process	18/1057	157/18800	0.00319051	0.0309617	0.024253	EGF/CD81/HSPA1B/HECTD1/BCAP31/PTTG1IP/CTSC/TMEM259/FMR1/ZYG11B/ANKIB1/EZR/HERPUD1/FBXL5/RDX/CSNK1A1/DDRGK1/HSPA1A	18
GO:0007588	BP	GO:0007588	excretion	10/1057	65/18800	0.00322703	0.0309617	0.024253	CLCNKB/CLDN16/CLCN5/KCNJ1/CLCNKA/POU3F3/NEDD4L/MLLT6/ATP6V0A4/NFAT5	10
GO:0000956	BP	GO:0000956	nuclear-transcribed mRNA catabolic process	15/1057	121/18800	0.00324261	0.0309617	0.024253	ZFP36L1/SMG1/ZFP36/TNRC6A/TNRC6B/TOB1/HNRNPU/BTG2/TENT2/XRN1/SMG7/TUT4/CNOT6L/SYNCRIP/ZFP36L2	15
GO:0006865	BP	GO:0006865	amino acid transport	17/1057	145/18800	0.00324667	0.0309617	0.024253	ITGB1/NTRK2/SLC3A1/ARL6IP1/SERINC3/KCNJ10/SLC38A10/SLC38A2/SLC43A2/SLC38A1/RAB3GAP1/SLC7A8/NF1/ARL6IP5/SLC1A5/SLC3A2/LLGL2	17
GO:0007612	BP	GO:0007612	learning	17/1057	145/18800	0.00324667	0.0309617	0.024253	APP/FOS/NPTN/INSR/ITGB1/NTRK2/PLCB1/SHANK2/HMGCR/ATAD1/PGRMC1/LGMN/BTG2/PPT1/NF1/HIF1A/UBE3A	17
GO:0030048	BP	GO:0030048	actin filament-based movement	16/1057	133/18800	0.00326746	0.0309617	0.024253	ATP1A1/AKAP9/DSG2/SYNE2/ACTN4/ATP2A2/NEDD4L/MYO6/DSP/ANK2/LIMCH1/FLNA/JUP/MYH10/MYH9/EPB41L5	16
GO:0045862	BP	GO:0045862	positive regulation of proteolysis	34/1057	369/18800	0.00326796	0.0309617	0.024253	EGF/APP/CTSD/CYFIP2/COL4A3/HSPA1B/HECTD1/BCAP31/OGT/HPN/CTSC/TMEM259/ASPH/HIP1/FMR1/IST1/HIP1R/LGMN/GRN/CLDN4/ARL6IP5/DAPK1/ZYG11B/PERP/ANKIB1/HERPUD1/CLDN3/MYH9/STAT3/REST/DDX3X/CSNK1A1/DDRGK1/HSPA1A	34
GO:0051271	BP	GO:0051271	negative regulation of cellular component movement	34/1057	369/18800	0.00326796	0.0309617	0.024253	SFRP1/CD9/CALR/CXCL12/CYP1B1/SEMA6D/THBS1/SPINT2/PKHD1/PTPRG/JAG1/CDH1/ADGRG1/DUSP1/NR2F2/RAP2C/PLCB1/ATP1B2/NISCH/LIMCH1/JUP/ARID2/VCL/BST2/CLDN19/PHLDB2/AFDN/NF1/TACSTD2/MEF2C/CLDN3/CERS2/STAT3/RHOB	34
GO:0032781	BP	GO:0032781	positive regulation of ATP-dependent activity	8/1057	45/18800	0.00326896	0.0309617	0.024253	ATP1B1/CASR/DNAJC10/ATP1B2/FXYD2/VMP1/HNRNPU/ATP1B3	8
GO:0035384	BP	GO:0035384	thioester biosynthetic process	8/1057	45/18800	0.00326896	0.0309617	0.024253	ACSL3/ACSL4/ACSL1/ACSS1/PPT1/TECR/HSD17B12/DLD	8
GO:0045047	BP	GO:0045047	protein targeting to ER	8/1057	45/18800	0.00326896	0.0309617	0.024253	MAN1A1/SPCS2/TRAM1/HSPA5/SEC63/SPCS3/HERPUD1/SEC62	8
GO:0071616	BP	GO:0071616	acyl-CoA biosynthetic process	8/1057	45/18800	0.00326896	0.0309617	0.024253	ACSL3/ACSL4/ACSL1/ACSS1/PPT1/TECR/HSD17B12/DLD	8
GO:0072583	BP	GO:0072583	clathrin-dependent endocytosis	8/1057	45/18800	0.00326896	0.0309617	0.024253	CANX/LMBRD1/CLTC/SGIP1/HIP1/HIP1R/AP2B1/AP2A2	8
GO:0089718	BP	GO:0089718	amino acid import across plasma membrane	8/1057	45/18800	0.00326896	0.0309617	0.024253	ITGB1/ARL6IP1/KCNJ10/SLC43A2/SLC7A8/ARL6IP5/SLC1A5/SLC3A2	8
GO:1902895	BP	GO:1902895	positive regulation of miRNA transcription	8/1057	45/18800	0.00326896	0.0309617	0.024253	FOS/EGR1/SREBF1/TEAD1/JUN/HIF1A/SMARCA4/STAT3	8
GO:0021537	BP	GO:0021537	telencephalon development	25/1057	247/18800	0.00327913	0.0310027	0.0242851	ERBB4/CXCL12/CTNNB1/RTN4/NTRK2/SYNE2/PROX1/ADGRG1/PLCB1/POU3F3/ATP1B2/LAMB1/OGDH/IGF1R/ZMIZ1/SUN1/SLC38A2/RYK/TRA2B/BTG2/TENT2/SALL1/NF1/HIF1A/EMX2	25
GO:0097191	BP	GO:0097191	extrinsic apoptotic signaling pathway	23/1057	221/18800	0.00331374	0.0310623	0.0243318	SFRP1/MAL/THBS1/FGFR3/HSPA1B/BIRC6/ITGA6/ITGAV/ACVR1B/SORT1/PDIA3/ITM2C/PHIP/KITLG/HIPK1/YAP1/NF1/TCF7L2/DAPK1/PPP2R1A/PDPK1/DDX3X/HSPA1A	23
GO:0002092	BP	GO:0002092	positive regulation of receptor internalization	6/1057	27/18800	0.00332583	0.0310623	0.0243318	EGF/INSR/VEGFA/FMR1/ATAD1/CD63	6
GO:0030325	BP	GO:0030325	adrenal gland development	6/1057	27/18800	0.00332583	0.0310623	0.0243318	CYP1B1/INSR/PBX1/SALL1/NF1/SMAD2	6
GO:1901018	BP	GO:1901018	positive regulation of potassium ion transmembrane transporter activity	6/1057	27/18800	0.00332583	0.0310623	0.0243318	ATP1B1/AKAP9/ATP1B2/FXYD2/ANK2/ATP1B3	6
GO:0001706	BP	GO:0001706	endoderm formation	9/1057	55/18800	0.00333417	0.0310623	0.0243318	CTNNB1/COL6A1/DUSP1/COL4A2/ITGAV/LAMB1/ITGB5/SETD2/SMAD2	9
GO:0006491	BP	GO:0006491	N-glycan processing	5/1057	19/18800	0.00333814	0.0310623	0.0243318	MAN1A1/MGAT4A/MAN2A1/MAN1A2/PRKCSH	5
GO:0035338	BP	GO:0035338	long-chain fatty-acyl-CoA biosynthetic process	5/1057	19/18800	0.00333814	0.0310623	0.0243318	ACSL3/ACSL4/ACSL1/TECR/HSD17B12	5
GO:0060216	BP	GO:0060216	definitive hemopoiesis	5/1057	19/18800	0.00333814	0.0310623	0.0243318	HOXB3/HIPK1/ADAR/SP3/ZFP36L2	5
GO:1905146	BP	GO:1905146	lysosomal protein catabolic process	5/1057	19/18800	0.00333814	0.0310623	0.0243318	TMEM106B/LAMP2/VPS13A/LAPTM4B/DPP7	5
GO:0008344	BP	GO:0008344	adult locomotory behavior	11/1057	76/18800	0.00335778	0.0311903	0.0244321	APP/CXCL12/CLCN3/HIPK2/ZMPSTE24/SHANK2/KCNJ10/CHL1/PUM1/PPT1/OXR1	11
GO:0010639	BP	GO:0010639	negative regulation of organelle organization	33/1057	356/18800	0.00339162	0.0312014	0.0244407	CGNL1/SPTBN1/TBC1D4/SCIN/ATRX/DUSP1/PLEKHH2/SPTAN1/SEC22B/TOM1L2/TAOK1/HUWE1/HNRNPU/HIP1R/ADD3/TNKS2/ZNF207/CARMIL1/PHLDB2/DYRK1A/YAP1/TACSTD2/RAD21/TJP1/XRN1/ARHGAP6/ARFGEF1/OPA1/OMA1/TMEM14A/RDX/SMARCA5/HSPA1A	33
GO:0045766	BP	GO:0045766	positive regulation of angiogenesis	20/1057	183/18800	0.00341108	0.0312014	0.0244407	CYP1B1/ITGB1/THBS1/VEGFA/HIPK2/MTDH/JUP/EMC10/DDAH1/HIPK1/GRN/PRKD1/TJP1/ITGB8/SP1/HIF1A/MYDGF/STAT3/PDPK1/RHOB	20
GO:1904018	BP	GO:1904018	positive regulation of vasculature development	20/1057	183/18800	0.00341108	0.0312014	0.0244407	CYP1B1/ITGB1/THBS1/VEGFA/HIPK2/MTDH/JUP/EMC10/DDAH1/HIPK1/GRN/PRKD1/TJP1/ITGB8/SP1/HIF1A/MYDGF/STAT3/PDPK1/RHOB	20
GO:0003337	BP	GO:0003337	mesenchymal to epithelial transition involved in metanephros morphogenesis	4/1057	12/18800	0.0034178	0.0312014	0.0244407	CTNNB1/PAX2/SALL1/STAT1	4
GO:0006983	BP	GO:0006983	ER overload response	4/1057	12/18800	0.0034178	0.0312014	0.0244407	TMCO1/HSPA5/CCDC47/SELENOS	4
GO:0015803	BP	GO:0015803	branched-chain amino acid transport	4/1057	12/18800	0.0034178	0.0312014	0.0244407	SLC43A2/SLC7A8/SLC3A2/LLGL2	4
GO:0038063	BP	GO:0038063	collagen-activated tyrosine kinase receptor signaling pathway	4/1057	12/18800	0.0034178	0.0312014	0.0244407	COL4A3/COL4A2/DDR1/COL4A1	4
GO:0072182	BP	GO:0072182	regulation of nephron tubule epithelial cell differentiation	4/1057	12/18800	0.0034178	0.0312014	0.0244407	CTNNB1/PAX2/YAP1/STAT1	4
GO:0072497	BP	GO:0072497	mesenchymal stem cell differentiation	4/1057	12/18800	0.0034178	0.0312014	0.0244407	CTNNB1/SOX6/LTBP3/REST	4
GO:0098935	BP	GO:0098935	dendritic transport	4/1057	12/18800	0.0034178	0.0312014	0.0244407	SFPQ/HNRNPU/PURA/KIF5B	4
GO:0002062	BP	GO:0002062	chondrocyte differentiation	14/1057	110/18800	0.00343841	0.0312283	0.0244618	CTNNB1/CREB3L2/SCIN/FGFR3/GLG1/PTH1R/SOX6/MBOAT2/LTBP3/FGF9/TRIP11/MAF/MEF2C/ATF2	14
GO:0030148	BP	GO:0030148	sphingolipid biosynthetic process	14/1057	110/18800	0.00343841	0.0312283	0.0244618	TM9SF2/HACD3/UGT8/SGPP2/SPTLC1/SGMS2/SGMS1/ASAH1/PRKD1/KDSR/UGCG/CERS2/PRKAA1/ORMDL1	14
GO:0048259	BP	GO:0048259	regulation of receptor-mediated endocytosis	14/1057	110/18800	0.00343841	0.0312283	0.0244618	EGF/INSR/VEGFA/SGIP1/ITGAV/MKLN1/HIP1/FMR1/ATAD1/CD63/HIP1R/LRPAP1/PPT1/RAB21	14
GO:0002504	BP	GO:0002504	antigen processing and presentation of peptide or polysaccharide antigen via MHC class II	7/1057	36/18800	0.00346055	0.0313757	0.0245772	CTSD/THBS1/IFI30/CTSL/CTSF/LGMN/ARL8B	7
GO:0097305	BP	GO:0097305	response to alcohol	24/1057	235/18800	0.00349074	0.0315954	0.0247493	SFRP1/FOS/CTNNB1/IGFBP7/CYP1B1/FOSB/ITPR2/PRKAA2/SREBF1/CDH1/LRP6/ATP2B1/SDF4/IGF1R/GOLPH3/JUP/GLB1/KLF9/XRN1/CLDN3/BIRC2/LARP1/PRKAA1/SMAD2	24
GO:0010811	BP	GO:0010811	positive regulation of cell-substrate adhesion	15/1057	122/18800	0.0035101	0.0317165	0.0248442	SFRP1/CALR/SDC4/VEGFA/UTRN/FLNA/JUP/P4HB/CARMIL1/DOCK1/RIN2/HSD17B12/NEDD9/EPB41L5/CDC42	15
GO:2001242	BP	GO:2001242	regulation of intrinsic apoptotic signaling pathway	19/1057	171/18800	0.00354315	0.0319606	0.0250354	MUC1/TMBIM6/CXCL12/IVNS1ABP/BCAP31/PTTG1IP/SFPQ/GRINA/SERINC3/SELENOS/HYOU1/SGMS1/BCLAF1/P4HB/HERPUD1/HIF1A/OPA1/DDX3X/HSPA1A	19
GO:1903706	BP	GO:1903706	regulation of hemopoiesis	34/1057	371/18800	0.00355835	0.0320433	0.0251002	SFRP1/FOS/CD46/CTNNB1/ZFP36L1/SCIN/JAG1/HSPA1B/ERBB2/ZFP36/FGL2/ACVR1B/GAS6/PRKDC/ZMIZ1/NDFIP1/FOXP1/KITLG/MYSM1/CLPTM1/NF1/CUL4A/P4HTM/MEF2C/HIF1A/PURB/HOXA5/STAT3/SOX4/AP3B1/STAT1/ZFP36L2/HLA-B/HSPA1A	34
GO:0010466	BP	GO:0010466	negative regulation of peptidase activity	26/1057	262/18800	0.00358978	0.0322715	0.025279	APLP2/APP/KNG1/CRIM1/CST3/WFDC2/THBS1/SPINT2/VEGFA/SORL1/GPC3/COL4A3/TMED10/SERPINA5/BIRC6/ARL6IP1/SERPING1/SPINT1/GAS6/BST2/PAX2/CTSB/XIAP/BIRC2/TFPI/DDX3X	26
GO:0045639	BP	GO:0045639	positive regulation of myeloid cell differentiation	13/1057	99/18800	0.00359973	0.0323062	0.0253062	FOS/ZFP36L1/SCIN/JAG1/HSPA1B/ACVR1B/PRKDC/KITLG/HIF1A/HOXA5/STAT3/STAT1/HSPA1A	13
GO:0030193	BP	GO:0030193	regulation of blood coagulation	10/1057	66/18800	0.00361596	0.0323971	0.0253773	CD9/KNG1/PLAU/THBS1/SERPING1/TSPAN8/ANO6/TFPI/PDGFA/VKORC1	10
GO:0010631	BP	GO:0010631	epithelial cell migration	33/1057	358/18800	0.00369777	0.0330742	0.0259077	EGF/CALR/CYP1B1/RTN4/ITGB1/THBS1/VEGFA/PTPRG/PROX1/PRCP/NR2F2/PKN2/ITGA2/MACF1/FOXP1/JUN/JUP/EMC10/LGMN/GRN/NF1/TACSTD2/DOCK1/PRKD1/MEF2C/RIN2/SP1/HIF1A/MYH9/EPB41L5/PDPK1/PIK3C2A/RHOB	33
GO:0006140	BP	GO:0006140	regulation of nucleotide metabolic process	12/1057	88/18800	0.00370459	0.0330794	0.0259118	APP/INSR/PPARGC1A/PRKAA2/OGT/SLC4A4/AK4/HIF1A/ZBTB20/NCOR1/STAT3/PRKAA1	12
GO:0055078	BP	GO:0055078	sodium ion homeostasis	9/1057	56/18800	0.00377869	0.0336327	0.0263452	ATP1A1/ATP1B1/SLC12A1/SCNN1A/NEDD4L/ATP1B2/MLLT6/ATP1B3/TFAP2B	9
GO:1990138	BP	GO:1990138	neuron projection extension	19/1057	172/18800	0.00377924	0.0336327	0.0263452	CXCL12/CTNNB1/RTN4/SEMA6D/ITGB1/CYFIP2/VEGFA/IQGAP1/NEDD4L/MACF1/DDR1/VCL/GOLGA4/RYK/ADNP/USP9X/RAB21/DPYSL2/SPAG9	19
GO:0001704	BP	GO:0001704	formation of primary germ layer	15/1057	123/18800	0.00379541	0.0336636	0.0263694	WLS/CTNNB1/COL6A1/ITGB1/PRKAR1A/DUSP1/COL4A2/ITGAV/ITGA2/LAMB1/PAX2/ITGB5/SETD2/EPB41L5/SMAD2	15
GO:0002244	BP	GO:0002244	hematopoietic progenitor cell differentiation	15/1057	123/18800	0.00379541	0.0336636	0.0263694	SFRP1/N4BP2L2/RBM47/HOXB3/PRKDC/UFL1/PRRC2C/NUDT21/TENT2/KITLG/ADAR/SOX4/REST/AP3B1/ATF2	15
GO:0045765	BP	GO:0045765	regulation of angiogenesis	32/1057	345/18800	0.00383743	0.0339795	0.0266169	SFRP1/CTNNB1/CYP1B1/ITGB1/THBS1/VEGFA/HIPK2/COL4A3/ERBB2/GPNMB/MTDH/COL4A2/TSPAN12/JUP/EMC10/DDAH1/HIPK1/GRN/GTF2I/NF1/PRKD1/TJP1/ITGB8/SP1/HIF1A/MYDGF/HOXA5/STAT3/PDPK1/STAT1/ATF2/RHOB	32
GO:0072521	BP	GO:0072521	purine-containing compound metabolic process	37/1057	416/18800	0.00400151	0.0353734	0.0277087	APP/ATP6V0C/INSR/ACSL3/ATP6V1A/ACSL4/PPARGC1A/PRKAA2/NME3/OGDHL/TPST2/OGT/ACSL1/NUDT4/OGDH/HMGCR/PANK3/SLC4A4/ACSS1/AK3/PPT1/PFKL/AK4/TECR/MCCC2/PAPSS2/HSD17B12/FAR1/HIF1A/ZBTB20/DLD/NCOR1/STAT3/PRKAA1/OPA1/CASK/RHOQ	37
GO:0090312	BP	GO:0090312	positive regulation of protein deacetylation	6/1057	28/18800	0.0040347	0.0354871	0.0277978	VEGFA/SREBF1/CTBP1/DYRK1A/NIPBL/PRKD1	6
GO:0051851	BP	GO:0051851	modulation by host of symbiont process	10/1057	67/18800	0.00404114	0.0354871	0.0277978	PPIB/IGF2R/NUCKS1/HPN/JUN/FMR1/SP1/SMARCA4/REST/TARDBP	10
GO:1901016	BP	GO:1901016	regulation of potassium ion transmembrane transporter activity	10/1057	67/18800	0.00404114	0.0354871	0.0277978	ATP1B1/AKAP9/ITGB1/ANK3/NEDD4L/ATP1B2/FXYD2/ANK2/KLHL24/ATP1B3	10
GO:1902475	BP	GO:1902475	L-alpha-amino acid transmembrane transport	10/1057	67/18800	0.00404114	0.0354871	0.0277978	ITGB1/SLC3A1/ARL6IP1/KCNJ10/SLC43A2/SLC38A1/SLC7A8/ARL6IP5/SLC1A5/SLC3A2	10
GO:0033144	BP	GO:0033144	negative regulation of intracellular steroid hormone receptor signaling pathway	7/1057	37/18800	0.00406469	0.0354911	0.0278009	SFRP1/CALR/FOXP1/PIAS2/SMARCA4/NCOR1/STRN3	7
GO:0071542	BP	GO:0071542	dopaminergic neuron differentiation	7/1057	37/18800	0.00406469	0.0354911	0.0278009	SFRP1/CTNNB1/VEGFA/LRP6/RYK/HIF1A/MANF	7
GO:0001942	BP	GO:0001942	hair follicle development	12/1057	89/18800	0.00406836	0.0354911	0.0278009	CTNNB1/LGR4/ZMPSTE24/FZD6/ACVR1B/LAMA5/SOSTDC1/ZDHHC21/MYSM1/NF1/PDGFA/FOXQ1	12
GO:1903578	BP	GO:1903578	regulation of ATP metabolic process	12/1057	89/18800	0.00406836	0.0354911	0.0278009	APP/INSR/PPARGC1A/PRKAA2/OGT/SLC4A4/AK4/HIF1A/ZBTB20/NCOR1/STAT3/PRKAA1	12
GO:0018210	BP	GO:0018210	peptidyl-threonine modification	15/1057	124/18800	0.0040994	0.0357031	0.027967	EGF/APP/HIPK2/CLK1/ACVR1B/WNK1/PRKDC/HIPK3/HIPK1/MAPK1/DYRK1A/PRKD1/EIF4G1/PDPK1/ATF2	15
GO:1902369	BP	GO:1902369	negative regulation of RNA catabolic process	11/1057	78/18800	0.00411952	0.0358195	0.0280582	ZFP36/TOB1/FMR1/HNRNPU/TENT2/LRPPRC/FUS/ELAVL1/LARP1/SYNCRIP/TARDBP	11
GO:0090132	BP	GO:0090132	epithelium migration	33/1057	361/18800	0.00420091	0.0364184	0.0285273	EGF/CALR/CYP1B1/RTN4/ITGB1/THBS1/VEGFA/PTPRG/PROX1/PRCP/NR2F2/PKN2/ITGA2/MACF1/FOXP1/JUN/JUP/EMC10/LGMN/GRN/NF1/TACSTD2/DOCK1/PRKD1/MEF2C/RIN2/SP1/HIF1A/MYH9/EPB41L5/PDPK1/PIK3C2A/RHOB	33
GO:0022411	BP	GO:0022411	cellular component disassembly	40/1057	460/18800	0.00420212	0.0364184	0.0285273	CST3/INSR/SPTBN1/SCIN/SREBF1/ZMPSTE24/ATP2A2/ARID1A/SNX14/VPS13C/LAMP2/PLEKHH2/HPN/TEX264/DICER1/ASPH/IGF1R/DDR1/UFL1/ADAM10/VMP1/PBXIP1/SPTAN1/TAOK1/HUWE1/ARID2/IST1/LRBA/SMARCC2/SETX/ADD3/CARMIL1/KIF5B/HIF1A/SMARCA4/SLC25A46/RDX/WDR1/DDRGK1/WDR72	40
GO:0006901	BP	GO:0006901	vesicle coating	5/1057	20/18800	0.00424746	0.0366914	0.0287411	TMED2/TMED10/SAR1A/SAR1B/TMED9	5
GO:0035455	BP	GO:0035455	response to interferon-alpha	5/1057	20/18800	0.00424746	0.0366914	0.0287411	GAS6/BST2/ADAR/IFNAR1/RO60	5
GO:0098900	BP	GO:0098900	regulation of action potential	9/1057	57/18800	0.00426831	0.0368115	0.0288353	AKAP9/DSG2/ATP2A2/DSP/CXADR/ANK2/FMR1/FLNA/JUP	9
GO:0043616	BP	GO:0043616	keratinocyte proliferation	8/1057	47/18800	0.0043195	0.0371046	0.0290648	ZFP36L1/SRSF6/ZFP36/YAP1/KLF9/PRKD1/STXBP4/CASK	8
GO:0043618	BP	GO:0043618	regulation of transcription from RNA polymerase II promoter in response to stress	8/1057	47/18800	0.0043195	0.0371046	0.0290648	MUC1/TMBIM6/VEGFA/EGR1/HSPA5/JUN/HIF1A/HSPA1A	8
GO:0032984	BP	GO:0032984	protein-containing complex disassembly	24/1057	239/18800	0.00432327	0.0371046	0.0290648	INSR/SPTBN1/SCIN/ZMPSTE24/ATP2A2/ARID1A/SNX14/LAMP2/PLEKHH2/ASPH/IGF1R/VMP1/SPTAN1/TAOK1/ARID2/IST1/SMARCC2/SETX/ADD3/CARMIL1/KIF5B/SMARCA4/RDX/WDR1	24
GO:0030900	BP	GO:0030900	forebrain development	34/1057	376/18800	0.00438209	0.0375428	0.0294081	APP/ERBB4/CXCL12/CTNNB1/RTN4/NTRK2/SYNE2/PROX1/ATRX/CDH1/ADGRG1/NR2F2/PLCB1/POU3F3/ATP1B2/LAMB1/OGDH/PCM1/IGF1R/ZMIZ1/SUN1/SLC38A2/RYK/RAB3GAP1/TRA2B/BTG2/TENT2/SALL1/SETD2/NF1/TOP2B/ARHGAP35/HIF1A/EMX2	34
GO:0090596	BP	GO:0090596	sensory organ morphogenesis	26/1057	266/18800	0.00438917	0.0375428	0.0294081	CTNNB1/VEGFA/NTRK2/HIPK2/JAG1/OBSL1/PROX1/MAN2A1/FZD6/FAT1/HPN/TUG1/MYO6/TSPAN12/PRKCI/PAX2/FGF9/HIPK1/MAPK1/NIPBL/NF1/HIF1A/TFAP2B/SP3/ABI2/STAT3	26
GO:0031623	BP	GO:0031623	receptor internalization	14/1057	113/18800	0.00439556	0.0375428	0.0294081	EGF/CD9/CD81/INSR/LMBRD1/ITGB1/VEGFA/CLTC/MKLN1/FMR1/ATAD1/CD63/LRPAP1/EZR	14
GO:0033865	BP	GO:0033865	nucleoside bisphosphate metabolic process	15/1057	125/18800	0.00442296	0.0375951	0.0294491	ACSL3/ACSL4/TPST2/ACSL1/OGDH/HMGCR/PANK3/ACSS1/PPT1/TECR/MCCC2/PAPSS2/HSD17B12/FAR1/DLD	15
GO:0033875	BP	GO:0033875	ribonucleoside bisphosphate metabolic process	15/1057	125/18800	0.00442296	0.0375951	0.0294491	ACSL3/ACSL4/TPST2/ACSL1/OGDH/HMGCR/PANK3/ACSS1/PPT1/TECR/MCCC2/PAPSS2/HSD17B12/FAR1/DLD	15
GO:0034032	BP	GO:0034032	purine nucleoside bisphosphate metabolic process	15/1057	125/18800	0.00442296	0.0375951	0.0294491	ACSL3/ACSL4/TPST2/ACSL1/OGDH/HMGCR/PANK3/ACSS1/PPT1/TECR/MCCC2/PAPSS2/HSD17B12/FAR1/DLD	15
GO:0030509	BP	GO:0030509	BMP signaling pathway	18/1057	162/18800	0.00445913	0.0378419	0.0296424	SFRP1/CRIM1/HIPK2/SORL1/GPC3/EGR1/SLC33A1/TOB1/GDF15/SOSTDC1/SMAD5/USP9X/TRIM33/XIAP/TFAP2B/PPM1A/SMAD2/ATF2	18
GO:1900046	BP	GO:1900046	regulation of hemostasis	10/1057	68/18800	0.00450484	0.0381688	0.0298984	CD9/KNG1/PLAU/THBS1/SERPING1/TSPAN8/ANO6/TFPI/PDGFA/VKORC1	10
GO:0000245	BP	GO:0000245	spliceosomal complex assembly	11/1057	79/18800	0.00454881	0.0382966	0.0299986	SRSF6/CELF1/LUC7L3/SF1/SETX/RBM5/SCAF11/SF3B1/PTBP2/YTHDC1/LUC7L2	11
GO:0010770	BP	GO:0010770	positive regulation of cell morphogenesis involved in differentiation	11/1057	79/18800	0.00454881	0.0382966	0.0299986	CALR/OBSL1/PRKDC/FLNA/P4HB/CARMIL1/DOCK1/CAPRIN1/NEDD9/RAB21/CDC42	11
GO:0048145	BP	GO:0048145	regulation of fibroblast proliferation	11/1057	79/18800	0.00454881	0.0382966	0.0299986	SFRP1/CTNNB1/IFI30/ZMPSTE24/GAS6/ZMIZ1/JUN/NF1/BMI1/PAWR/PDGFA	11
GO:0048844	BP	GO:0048844	artery morphogenesis	11/1057	79/18800	0.00454881	0.0382966	0.0299986	VEGFA/JAG1/PROX1/MYLK/PKD2/FOLR1/ZMIZ1/ARID2/NF1/TFAP2B/SOX4	11
GO:2001243	BP	GO:2001243	negative regulation of intrinsic apoptotic signaling pathway	13/1057	102/18800	0.00466447	0.0392082	0.0307126	MUC1/TMBIM6/CXCL12/IVNS1ABP/PTTG1IP/GRINA/SELENOS/HYOU1/HERPUD1/HIF1A/OPA1/DDX3X/HSPA1A	13
GO:0042552	BP	GO:0042552	myelination	16/1057	138/18800	0.00470928	0.0394172	0.0308763	CD9/CTNNB1/MAL/NTRK2/UGT8/ERBB2/KCNJ10/CTSC/DICER1/ANK2/NF1/EPB41L3/SLC25A46/QKI/NDRG1/MAL2	16
GO:0003007	BP	GO:0003007	heart morphogenesis	25/1057	254/18800	0.00471191	0.0394172	0.0308763	CTNNB1/RTN4/TMED2/INSR/VEGFA/MDM4/JAG1/PROX1/PKD2/ZMPSTE24/NPY1R/MIB1/FOLR1/DSP/ZMIZ1/JUN/FLNA/ARID2/YAP1/NIPBL/MEF2C/HIF1A/SOX4/CDC42/ATF2	25
GO:0090161	BP	GO:0090161	Golgi ribbon formation	4/1057	13/18800	0.00471907	0.0394172	0.0308763	GOLPH3/STX16/TRIP11/GCC2	4
GO:1903651	BP	GO:1903651	positive regulation of cytoplasmic transport	4/1057	13/18800	0.00471907	0.0394172	0.0308763	SORL1/EZR/RAB21/RDX	4
GO:0035337	BP	GO:0035337	fatty-acyl-CoA metabolic process	7/1057	38/18800	0.0047454	0.0395749	0.0309998	ACSL3/ACSL4/ACSL1/PPT1/TECR/HSD17B12/FAR1	7
GO:0045861	BP	GO:0045861	negative regulation of proteolysis	32/1057	350/18800	0.00475556	0.0395973	0.0310174	APLP2/TMEM59/APP/KNG1/CRIM1/CST3/WFDC2/THBS1/SPINT2/VEGFA/HIPK2/SORL1/GPC3/COL4A3/TMED10/SERPINA5/BIRC6/ARL6IP1/GLG1/SERPING1/SPINT1/OGT/GAS6/BST2/PAX2/CTSB/XIAP/BIRC2/TFPI/WAC/DDX3X/DDRGK1	32
GO:0006695	BP	GO:0006695	cholesterol biosynthetic process	9/1057	58/18800	0.00480601	0.0397057	0.0311024	PRKAA2/SREBF1/HMGCR/ERLIN2/LBR/CYB5R3/CYP51A1/MBTPS1/PRKAA1	9
GO:0086065	BP	GO:0086065	cell communication involved in cardiac conduction	9/1057	58/18800	0.00480601	0.0397057	0.0311024	ATP1A1/ATP1B1/DSG2/ATP1B2/DSP/CXADR/ANK2/FLNA/JUP	9
GO:1900024	BP	GO:1900024	regulation of substrate adhesion-dependent cell spreading	9/1057	58/18800	0.00480601	0.0397057	0.0311024	CALR/ACTN4/FLNA/P4HB/CARMIL1/TACSTD2/DOCK1/NEDD9/CDC42	9
GO:1902653	BP	GO:1902653	secondary alcohol biosynthetic process	9/1057	58/18800	0.00480601	0.0397057	0.0311024	PRKAA2/SREBF1/HMGCR/ERLIN2/LBR/CYB5R3/CYP51A1/MBTPS1/PRKAA1	9
GO:2000649	BP	GO:2000649	regulation of sodium ion transmembrane transporter activity	9/1057	58/18800	0.00480601	0.0397057	0.0311024	ATP1B1/WNK4/ACTN4/ANK3/NEDD4L/WNK1/FXYD2/UTRN/KLHL24	9
GO:0002021	BP	GO:0002021	response to dietary excess	6/1057	29/18800	0.00484936	0.0400015	0.0313341	SORL1/PPARGC1A/SGIP1/TBL1XR1/GDF15/OMA1	6
GO:0030195	BP	GO:0030195	negative regulation of blood coagulation	8/1057	48/18800	0.00493346	0.0405063	0.0317294	CD9/KNG1/PLAU/THBS1/SERPING1/TSPAN8/TFPI/PDGFA	8
GO:0035272	BP	GO:0035272	exocrine system development	8/1057	48/18800	0.00493346	0.0405063	0.0317294	WLS/INSR/IGSF3/NTN4/LAMA5/TFCP2L1/CDC42/PDGFA	8
GO:0035850	BP	GO:0035850	epithelial cell differentiation involved in kidney development	8/1057	48/18800	0.00493346	0.0405063	0.0317294	CTNNB1/JAG1/IQGAP1/PAX2/SALL1/YAP1/MEF2C/STAT1	8
GO:0010038	BP	GO:0010038	response to metal ion	32/1057	351/18800	0.00495984	0.0406599	0.0318498	APP/BSG/FOS/CALR/SUCNR1/JUNB/THBS1/CASR/FOSB/IGFBP2/PRKAA2/IQGAP1/CDH1/PKD2/ANK3/HSPA5/NEDD4L/JUN/LGMN/PAM/SDC1/MAPK1/PPP2CB/SOD3/MEF2C/HIF1A/AHCYL1/JUND/PRKAA1/SEC31A/NDRG1/MEF2A	32
GO:0003151	BP	GO:0003151	outflow tract morphogenesis	11/1057	80/18800	0.00501286	0.0410312	0.0321406	CTNNB1/VEGFA/JAG1/NPY1R/FOLR1/JUN/NIPBL/MEF2C/HIF1A/CDC42/ATF2	11
GO:0019827	BP	GO:0019827	stem cell population maintenance	16/1057	139/18800	0.00505213	0.0412889	0.0323425	SFRP1/CTNNB1/JAG1/PROX1/PCM1/PAX2/YAP1/NIPBL/ZC3H13/CUL4A/ELAVL1/STAT3/SOX4/TUT4/REST/ZFP36L2	16
GO:0030518	BP	GO:0030518	intracellular steroid hormone receptor signaling pathway	14/1057	115/18800	0.00514587	0.0419903	0.0328919	SFRP1/DDX17/CALR/ARID1A/UFL1/ZMIZ1/FOXP1/PIAS2/YAP1/SMARCA4/NCOR1/UBE3A/STRN3/DDRGK1	14
GO:0051098	BP	GO:0051098	regulation of binding	33/1057	366/18800	0.00516818	0.042043	0.0329332	EGF/APP/TMBIM6/CTNNB1/HIPK2/SORL1/AMFR/ZMPSTE24/ATP2A2/CLN5/NUCKS1/SPPL3/CCPG1/ITGA2/JUN/PBXIP1/RAP1GAP/ZNF618/FMR1/HIP1R/LRPAP1/ADNP/TLE5/TCF7L2/RSF1/USP33/PPP2CB/EIF4G1/EPB41L5/CDC42/SMAD2/CSNK1A1/DDRGK1	33
GO:0090130	BP	GO:0090130	tissue migration	33/1057	366/18800	0.00516818	0.042043	0.0329332	EGF/CALR/CYP1B1/RTN4/ITGB1/THBS1/VEGFA/PTPRG/PROX1/PRCP/NR2F2/PKN2/ITGA2/MACF1/FOXP1/JUN/JUP/EMC10/LGMN/GRN/NF1/TACSTD2/DOCK1/PRKD1/MEF2C/RIN2/SP1/HIF1A/MYH9/EPB41L5/PDPK1/PIK3C2A/RHOB	33
GO:0009755	BP	GO:0009755	hormone-mediated signaling pathway	20/1057	190/18800	0.00520944	0.0423137	0.0331453	SFRP1/DDX17/CALR/LGR4/GCGR/ESRRG/PRCP/ARID1A/ACSL1/PRLR/UFL1/ZMIZ1/FOXP1/PIAS2/YAP1/SMARCA4/NCOR1/UBE3A/STRN3/DDRGK1	20
GO:1905039	BP	GO:1905039	carboxylic acid transmembrane transport	17/1057	152/18800	0.00526044	0.0426627	0.0334186	SLC16A7/ITGB1/THBS1/SLC3A1/ARL6IP1/ABCD3/FOLR1/KCNJ10/ACSL1/SLC38A10/SLC38A2/SLC43A2/SLC38A1/SLC7A8/ARL6IP5/SLC1A5/SLC3A2	17
GO:0006813	BP	GO:0006813	potassium ion transport	24/1057	243/18800	0.00531563	0.0427403	0.0334794	ATP1A1/ATP1B1/SLC12A1/KCNJ16/AKAP9/ITGB1/TMEM38B/WNK4/KCNJ1/PKD2/ANK3/NEDD4L/HPN/KCNJ10/ATP1B2/WNK1/FXYD2/ANK2/FLNA/CD63/KLHL24/ANO6/KIF5B/ATP1B3	24
GO:0009083	BP	GO:0009083	branched-chain amino acid catabolic process	5/1057	21/18800	0.00532042	0.0427403	0.0334794	MCCC2/BCKDHA/DLD/ALDH6A1/ACADSB	5
GO:0014850	BP	GO:0014850	response to muscle activity	5/1057	21/18800	0.00532042	0.0427403	0.0334794	PPARGC1A/PRKAA2/ITGA2/METRNL/HIF1A	5
GO:0038083	BP	GO:0038083	peptidyl-tyrosine autophosphorylation	5/1057	21/18800	0.00532042	0.0427403	0.0334794	INSR/VEGFA/IGF1R/DDR1/DYRK1A	5
GO:0071404	BP	GO:0071404	cellular response to low-density lipoprotein particle stimulus	5/1057	21/18800	0.00532042	0.0427403	0.0334794	CD9/CD81/ITGB1/CASR/LPL	5
GO:0090189	BP	GO:0090189	regulation of branching involved in ureteric bud morphogenesis	5/1057	21/18800	0.00532042	0.0427403	0.0334794	LGR4/VEGFA/PAX2/TACSTD2/MAGED1	5
GO:0022404	BP	GO:0022404	molting cycle process	12/1057	92/18800	0.00533448	0.0427403	0.0334794	CTNNB1/LGR4/ZMPSTE24/FZD6/ACVR1B/LAMA5/SOSTDC1/ZDHHC21/MYSM1/NF1/PDGFA/FOXQ1	12
GO:0022405	BP	GO:0022405	hair cycle process	12/1057	92/18800	0.00533448	0.0427403	0.0334794	CTNNB1/LGR4/ZMPSTE24/FZD6/ACVR1B/LAMA5/SOSTDC1/ZDHHC21/MYSM1/NF1/PDGFA/FOXQ1	12
GO:0071384	BP	GO:0071384	cellular response to corticosteroid stimulus	9/1057	59/18800	0.00539488	0.0430602	0.03373	CYP1B1/ZFP36L1/ZFP36/ATP2B1/IGF1R/HNRNPU/KLF9/REST/ZFP36L2	9
GO:1902893	BP	GO:1902893	regulation of miRNA transcription	9/1057	59/18800	0.00539488	0.0430602	0.03373	FOS/EGR1/SREBF1/TEAD1/JUN/HIF1A/SMARCA4/STAT3/REST	9
GO:2001234	BP	GO:2001234	negative regulation of apoptotic signaling pathway	23/1057	230/18800	0.00540662	0.0430602	0.03373	MUC1/TMBIM6/CXCL12/CTNNB1/THBS1/HSPA1B/IVNS1ABP/PTTG1IP/BIRC6/ITGA6/GRINA/ITGAV/SELENOS/HYOU1/PHIP/YAP1/TCF7L2/HERPUD1/HIF1A/OPA1/TMEM14A/DDX3X/HSPA1A	23
GO:0007272	BP	GO:0007272	ensheathment of neurons	16/1057	140/18800	0.005415	0.0430602	0.03373	CD9/CTNNB1/MAL/NTRK2/UGT8/ERBB2/KCNJ10/CTSC/DICER1/ANK2/NF1/EPB41L3/SLC25A46/QKI/NDRG1/MAL2	16
GO:0008366	BP	GO:0008366	axon ensheathment	16/1057	140/18800	0.005415	0.0430602	0.03373	CD9/CTNNB1/MAL/NTRK2/UGT8/ERBB2/KCNJ10/CTSC/DICER1/ANK2/NF1/EPB41L3/SLC25A46/QKI/NDRG1/MAL2	16
GO:0019218	BP	GO:0019218	regulation of steroid metabolic process	13/1057	104/18800	0.00550527	0.0435826	0.0341392	ATP1A1/IGFBP7/PROX1/EGR1/SREBF1/SF1/IGF1R/ERLIN2/ASAH1/ACADVL/MBTPS1/PRKAA1/REST	13
GO:0046822	BP	GO:0046822	regulation of nucleocytoplasmic transport	13/1057	104/18800	0.00550527	0.0435826	0.0341392	CDH1/XPO1/GAS6/FLNA/JUP/NUP58/SETD2/NF1/TCF7L2/PRKD1/UHMK1/PPM1A/TARDBP	13
GO:0045445	BP	GO:0045445	myoblast differentiation	11/1057	81/18800	0.00551356	0.0435826	0.0341392	DDX17/ZFP36L1/ITGB1/JAG1/PLCB1/SOSTDC1/SDC1/TCF7L2/MBNL1/MEF2C/REST	11
GO:0048144	BP	GO:0048144	fibroblast proliferation	11/1057	81/18800	0.00551356	0.0435826	0.0341392	SFRP1/CTNNB1/IFI30/ZMPSTE24/GAS6/ZMIZ1/JUN/NF1/BMI1/PAWR/PDGFA	11
GO:0071675	BP	GO:0071675	regulation of mononuclear cell migration	14/1057	116/18800	0.00555793	0.0438679	0.0343627	APP/CALR/CXCL12/THBS1/CD47/DUSP1/PLCB1/GAS6/WNK1/ADAM10/LGMN/MAPK1/ANO6/RARRES2	14
GO:0048762	BP	GO:0048762	mesenchymal cell differentiation	24/1057	244/18800	0.00559128	0.0440087	0.0344729	SFRP1/DDX17/ERBB4/CTNNB1/RTN4/SEMA6D/JAG1/LRP6/FOLR1/HPN/LAMA5/TASOR/FLNA/PAX2/KITLG/PHLDB2/MAPK1/TCF7L2/MEF2C/HIF1A/EPB41L5/CDC42/SMAD2/STAT1	24
GO:0006376	BP	GO:0006376	mRNA splice site selection	8/1057	49/18800	0.00561203	0.0440087	0.0344729	SRSF6/CELF1/LUC7L3/SF1/SETX/PTBP2/YTHDC1/LUC7L2	8
GO:0070839	BP	GO:0070839	metal ion export	8/1057	49/18800	0.00561203	0.0440087	0.0344729	ATP1A1/ATP1B1/ATP2B1/ATP1B2/FXYD2/SLC4A4/ANO6/ATP1B3	8
GO:1900047	BP	GO:1900047	negative regulation of hemostasis	8/1057	49/18800	0.00561203	0.0440087	0.0344729	CD9/KNG1/PLAU/THBS1/SERPING1/TSPAN8/TFPI/PDGFA	8
GO:1903825	BP	GO:1903825	organic acid transmembrane transport	17/1057	153/18800	0.00561724	0.0440087	0.0344729	SLC16A7/ITGB1/THBS1/SLC3A1/ARL6IP1/ABCD3/FOLR1/KCNJ10/ACSL1/SLC38A10/SLC38A2/SLC43A2/SLC38A1/SLC7A8/ARL6IP5/SLC1A5/SLC3A2	17
GO:0016197	BP	GO:0016197	endosomal transport	23/1057	231/18800	0.00569514	0.0445531	0.0348994	SORL1/KIAA1109/CLTC/CMTM6/TMEM50B/ATP6AP1/PREPL/CLN5/SORT1/TMEM50A/RHOBTB3/STX16/ZDHHC2/DENND1B/ARL8B/LAPTM4B/ZFYVE16/GCC2/LEPROT/SPAG9/AP3B1/AP5M1/RAB11FIP3	23
GO:0043543	BP	GO:0043543	protein acylation	25/1057	258/18800	0.00574301	0.0448615	0.0351409	MUC1/PPARGC1A/PRKAA2/ZMPSTE24/KMT2A/OGT/KANSL1/OGDH/PBXIP1/TAOK1/ZDHHC14/ZDHHC2/ZDHHC21/CTBP1/KAT6B/ZNF451/JADE1/DLD/PHF20L1/PRKAA1/SOX4/PPM1A/DDX3X/USP22/ATF2	25
GO:0098727	BP	GO:0098727	maintenance of cell number	16/1057	141/18800	0.00579875	0.0452302	0.0354298	SFRP1/CTNNB1/JAG1/PROX1/PCM1/PAX2/YAP1/NIPBL/ZC3H13/CUL4A/ELAVL1/STAT3/SOX4/TUT4/REST/ZFP36L2	16
GO:0031668	BP	GO:0031668	cellular response to extracellular stimulus	24/1057	245/18800	0.00587867	0.0457863	0.0358654	SFRP1/CPEB4/FOS/CASR/GCGR/LPL/PRKAA2/SREBF1/TNRC6A/ATP2B1/FOLR1/HSPA5/LAMP2/GAS6/SLC38A2/MAPK1/ADNP/TLE5/PRKD1/USP33/ARHGAP35/EIF4G1/PRKAA1/ATF2	24
GO:2000027	BP	GO:2000027	regulation of animal organ morphogenesis	15/1057	129/18800	0.00593137	0.046129	0.0361339	SFRP1/CTNNB1/LGR4/VEGFA/PKHD1/GPC3/FZD6/NTN4/DAAM1/PAX2/RYK/TACSTD2/MAGED1/CDC42/PDGFA	15
GO:0006672	BP	GO:0006672	ceramide metabolic process	13/1057	105/18800	0.00596887	0.0463527	0.036309	TM9SF2/UGT8/SPTLC1/SGMS2/SGMS1/ASAH1/ITGB8/PPP2R1A/NEU1/UGCG/CERS2/PRKAA1/ORMDL1	13
GO:0042752	BP	GO:0042752	regulation of circadian rhythm	14/1057	117/18800	0.00599609	0.046496	0.0364213	PPP1CB/PPARGC1A/PROX1/PRKAA2/SFPQ/BHLHE40/GNAQ/PRKDC/DDB1/USP9X/MAGED1/UBE3A/PRKAA1/TARDBP	14
GO:0061614	BP	GO:0061614	miRNA transcription	9/1057	60/18800	0.00603801	0.0466846	0.036569	FOS/EGR1/SREBF1/TEAD1/JUN/HIF1A/SMARCA4/STAT3/REST	9
GO:0090311	BP	GO:0090311	regulation of protein deacetylation	9/1057	60/18800	0.00603801	0.0466846	0.036569	VEGFA/PRKAA2/SREBF1/KDM5A/CTBP1/DYRK1A/NIPBL/PRKD1/PRKAA1	9
GO:1901983	BP	GO:1901983	regulation of protein acetylation	11/1057	82/18800	0.00605287	0.0467313	0.0366057	MUC1/PPARGC1A/PRKAA2/ZMPSTE24/KMT2A/TAOK1/CTBP1/ZNF451/PRKAA1/SOX4/DDX3X	11
GO:0050818	BP	GO:0050818	regulation of coagulation	10/1057	71/18800	0.00615071	0.0474177	0.0371433	CD9/KNG1/PLAU/THBS1/SERPING1/TSPAN8/ANO6/TFPI/PDGFA/VKORC1	10
GO:0010958	BP	GO:0010958	regulation of amino acid import across plasma membrane	4/1057	14/18800	0.0063159	0.0479931	0.037594	ITGB1/ARL6IP1/SLC43A2/ARL6IP5	4
GO:0030007	BP	GO:0030007	cellular potassium ion homeostasis	4/1057	14/18800	0.0063159	0.0479931	0.037594	ATP1A1/ATP1B1/ATP1B2/ATP1B3	4
GO:0032352	BP	GO:0032352	positive regulation of hormone metabolic process	4/1057	14/18800	0.0063159	0.0479931	0.037594	EGR1/HPN/IGF1R/HIF1A	4
GO:0043922	BP	GO:0043922	negative regulation by host of viral transcription	4/1057	14/18800	0.0063159	0.0479931	0.037594	NUCKS1/JUN/REST/TARDBP	4
GO:0044849	BP	GO:0044849	estrous cycle	4/1057	14/18800	0.0063159	0.0479931	0.037594	CYP1B1/EGR1/IGF1R/ADNP	4
GO:0060576	BP	GO:0060576	intestinal epithelial cell development	4/1057	14/18800	0.0063159	0.0479931	0.037594	IL6ST/YAP1/HIF1A/HOXA5	4
GO:0060628	BP	GO:0060628	regulation of ER to Golgi vesicle-mediated transport	4/1057	14/18800	0.0063159	0.0479931	0.037594	SORL1/SAR1A/SAR1B/YIPF5	4
GO:1903789	BP	GO:1903789	regulation of amino acid transmembrane transport	4/1057	14/18800	0.0063159	0.0479931	0.037594	ITGB1/ARL6IP1/SLC43A2/ARL6IP5	4
GO:0001738	BP	GO:0001738	morphogenesis of a polarized epithelium	12/1057	94/18800	0.00633977	0.0479931	0.037594	SFRP1/ERBB4/PKHD1/GPC3/FZD6/FAT1/LAMA5/DAAM1/MYO9A/RYK/CDC42/WDR1	12
GO:1901655	BP	GO:1901655	cellular response to ketone	12/1057	94/18800	0.00633977	0.0479931	0.037594	SPP1/SFRP1/CYP1B1/PRKAA2/ATP2B1/GAS6/IGF1R/GOLPH3/KLF9/XRN1/LARP1/PRKAA1	12
GO:0035088	BP	GO:0035088	establishment or maintenance of apical/basal cell polarity	8/1057	50/18800	0.0063594	0.0479931	0.037594	FAT1/PATJ/ERBIN/MYO9A/PRKCI/PDCD6IP/CDC42/WDR1	8
GO:0051646	BP	GO:0051646	mitochondrion localization	8/1057	50/18800	0.0063594	0.0479931	0.037594	PLIN5/CLUH/LRPPRC/RHOT2/ARMCX3/HIF1A/OPA1/MEF2A	8
GO:0061245	BP	GO:0061245	establishment or maintenance of bipolar cell polarity	8/1057	50/18800	0.0063594	0.0479931	0.037594	FAT1/PATJ/ERBIN/MYO9A/PRKCI/PDCD6IP/CDC42/WDR1	8
GO:0099622	BP	GO:0099622	cardiac muscle cell membrane repolarization	7/1057	40/18800	0.00635989	0.0479931	0.037594	ATP1A1/ATP1B1/AKAP9/ZMPSTE24/ANK2/FLNA/WDR1	7
GO:0045787	BP	GO:0045787	positive regulation of cell cycle	30/1057	329/18800	0.00636108	0.0479931	0.037594	EGF/APP/CALR/INSR/PBX1/PROX1/ATRX/LRP6/PKD2/SFPQ/PLCB1/CCPG1/PKP4/PKN2/IGF1R/HNRNPU/LGMN/PHIP/ANKRD17/DYNC1H1/RAD21/KMT2E/CUL4A/EIF4G1/STXBP4/RDX/CDC42/DDX3X/USP22/DDRGK1	30
GO:0098659	BP	GO:0098659	inorganic cation import across plasma membrane	14/1057	118/18800	0.0064615	0.0484866	0.0379806	ATP1A1/ATP1B1/SLC12A1/KCNJ16/SCNN1A/WNK4/KCNJ1/SLC39A6/KCNJ10/ATP1B2/WNK1/FXYD2/SLC39A10/ATP1B3	14
GO:0099587	BP	GO:0099587	inorganic ion import across plasma membrane	14/1057	118/18800	0.0064615	0.0484866	0.0379806	ATP1A1/ATP1B1/SLC12A1/KCNJ16/SCNN1A/WNK4/KCNJ1/SLC39A6/KCNJ10/ATP1B2/WNK1/FXYD2/SLC39A10/ATP1B3	14
GO:0032231	BP	GO:0032231	regulation of actin filament bundle assembly	13/1057	106/18800	0.00646305	0.0484866	0.0379806	SFRP1/SDC4/CGNL1/CD47/LIMCH1/FLNA/CARMIL1/PHLDB2/TACSTD2/TJP1/ARHGAP6/RDX/CDC42	13
GO:0060840	BP	GO:0060840	artery development	13/1057	106/18800	0.00646305	0.0484866	0.0379806	VEGFA/JAG1/PROX1/MYLK/PKD2/HECTD1/FOLR1/ZMIZ1/ARID2/NF1/TFAP2B/SOX4/AP2B1	13
GO:0002089	BP	GO:0002089	lens morphogenesis in camera-type eye	5/1057	22/18800	0.00657161	0.0489548	0.0383473	CTNNB1/HIPK2/PROX1/HIPK1/ABI2	5
GO:0031065	BP	GO:0031065	positive regulation of histone deacetylation	5/1057	22/18800	0.00657161	0.0489548	0.0383473	VEGFA/SREBF1/CTBP1/NIPBL/PRKD1	5
GO:0032288	BP	GO:0032288	myelin assembly	5/1057	22/18800	0.00657161	0.0489548	0.0383473	CD9/UGT8/DICER1/ANK2/EPB41L3	5
GO:0035089	BP	GO:0035089	establishment of apical/basal cell polarity	5/1057	22/18800	0.00657161	0.0489548	0.0383473	FAT1/PATJ/MYO9A/PRKCI/CDC42	5
GO:0046885	BP	GO:0046885	regulation of hormone biosynthetic process	5/1057	22/18800	0.00657161	0.0489548	0.0383473	ATP1A1/EGR1/IGF1R/HIF1A/REST	5
GO:0001508	BP	GO:0001508	action potential	16/1057	143/18800	0.00663229	0.0491995	0.038539	ATP1A1/ATP1B1/AKAP9/NTRK2/DSG2/ATP2A2/ANK3/NEDD4L/GNAQ/DSP/CXADR/ANK2/FMR1/FLNA/JUP/CLDN19	16
GO:0030010	BP	GO:0030010	establishment of cell polarity	16/1057	143/18800	0.00663229	0.0491995	0.038539	ITGB1/PKHD1/FAT1/PATJ/IGF1R/MYO9A/GOLPH3/WEE1/AMOTL2/PRKCI/RICTOR/MYH9/LLGL2/ARFGEF1/WWC1/CDC42	16
GO:0035264	BP	GO:0035264	multicellular organism growth	16/1057	143/18800	0.00663229	0.0491995	0.038539	APP/TMED2/ZFP36L1/PPIB/ATRX/ZMPSTE24/NPY1R/TBL1XR1/GDF15/WDR11/LGMN/TNKS2/NIPBL/EZR/HOXA5/STAT3	16
GO:0034113	BP	GO:0034113	heterotypic cell-cell adhesion	9/1057	61/18800	0.0067386	0.0499183	0.0391021	ITGB1/DSG2/CD47/ITGAV/WNK1/DSP/CXADR/JUP/PERP	9
GO:0030055	CC	GO:0030055	cell-substrate junction	73/1097	428/19594	9.3e-18	3.18e-15	2.04e-15	HSP90B1/CD9/CD81/ATP6V0C/PPP1CB/BSG/CALR/PLAU/CD46/CTNNB1/SDC4/CD59/ITGB1/HACD3/PPIB/SYNE2/LMO7/ACTN4/FGFR3/HSPA1B/CLTC/TNS1/PCBP2/IQGAP1/IGF2R/PTPRA/DST/ITGA6/NCKAP1/ITGAV/HSPA5/FLNB/FAT1/ITGA2/TSPAN9/AHNAK/ERBIN/ITGB6/ADAM10/HYOU1/FLNA/JUP/PDIA3/SLC4A2/STX16/VCL/SCARB2/YWHAG/ITGB5/P4HB/G3BP1/LPP/PHLDB2/MAPK1/CD151/MPRIP/EZR/USP33/ITGB8/PRKAR2A/MYH9/PDCD6IP/NEDD9/DCTN4/EPB41L5/RAB21/RDX/CDC42/PD…	73
GO:0005925	CC	GO:0005925	focal adhesion	72/1097	419/19594	1.03e-17	3.18e-15	2.04e-15	HSP90B1/CD9/CD81/ATP6V0C/PPP1CB/BSG/CALR/PLAU/CD46/CTNNB1/SDC4/CD59/ITGB1/HACD3/PPIB/SYNE2/LMO7/ACTN4/FGFR3/HSPA1B/CLTC/TNS1/PCBP2/IQGAP1/IGF2R/PTPRA/DST/ITGA6/NCKAP1/ITGAV/HSPA5/FLNB/FAT1/ITGA2/TSPAN9/AHNAK/ITGB6/ADAM10/HYOU1/FLNA/JUP/PDIA3/SLC4A2/STX16/VCL/SCARB2/YWHAG/ITGB5/P4HB/G3BP1/LPP/PHLDB2/MAPK1/CD151/MPRIP/EZR/USP33/ITGB8/PRKAR2A/MYH9/PDCD6IP/NEDD9/DCTN4/EPB41L5/RAB21/RDX/CDC42/PDPK1/CA…	72
GO:0005774	CC	GO:0005774	vacuolar membrane	74/1097	449/19594	3.9e-17	8e-15	5.15e-15	EGF/TMEM59/ATP6V0B/ATP6V0C/CTSD/CLCN5/PSAP/RNASEK/COL6A1/FNIP2/LMBRD1/CD164/ATP6V1A/LNPEP/OCLN/TMEM106B/CLCN3/SPPL2A/ABCA5/CLTC/CMTM6/MAGT1/LAMP1/PRCP/TM9SF1/LAPTM4A/SLC3A1/TMEM30A/ATP6AP2/SLC44A2/CLN5/SNX14/LAMP2/VPS13A/SORT1/MYO6/AP1G1/TEX264/GNAQ/AHNAK/TMEM9/VMP1/RPN2/TMEM165/WDR11/RNF13/UBA1/CD63/BST2/ATP6V0A4/SCARB2/ITM2C/TMEM179B/MFSD1/GRN/SURF4/M6PR/CTSA/B4GALT1/CUBN/ARL8B/KIF5B/SYNGR1/LAP…	74
GO:0005765	CC	GO:0005765	lysosomal membrane	68/1097	404/19594	2.57e-16	3.16e-14	2.03e-14	EGF/TMEM59/ATP6V0B/ATP6V0C/CTSD/CLCN5/PSAP/COL6A1/FNIP2/LMBRD1/CD164/ATP6V1A/LNPEP/OCLN/TMEM106B/CLCN3/SPPL2A/ABCA5/CLTC/CMTM6/MAGT1/LAMP1/PRCP/TM9SF1/LAPTM4A/TMEM30A/ATP6AP2/SLC44A2/CLN5/SNX14/LAMP2/VPS13A/SORT1/MYO6/AP1G1/GNAQ/AHNAK/TMEM9/TMEM165/WDR11/RNF13/UBA1/CD63/BST2/ATP6V0A4/SCARB2/ITM2C/TMEM179B/MFSD1/GRN/SURF4/M6PR/CTSA/B4GALT1/CUBN/ARL8B/KIF5B/SYNGR1/LAPTM4B/TMEM192/TMEM9B/SLC3A2/NEU1…	68
GO:0098852	CC	GO:0098852	lytic vacuole membrane	68/1097	404/19594	2.57e-16	3.16e-14	2.03e-14	EGF/TMEM59/ATP6V0B/ATP6V0C/CTSD/CLCN5/PSAP/COL6A1/FNIP2/LMBRD1/CD164/ATP6V1A/LNPEP/OCLN/TMEM106B/CLCN3/SPPL2A/ABCA5/CLTC/CMTM6/MAGT1/LAMP1/PRCP/TM9SF1/LAPTM4A/TMEM30A/ATP6AP2/SLC44A2/CLN5/SNX14/LAMP2/VPS13A/SORT1/MYO6/AP1G1/GNAQ/AHNAK/TMEM9/TMEM165/WDR11/RNF13/UBA1/CD63/BST2/ATP6V0A4/SCARB2/ITM2C/TMEM179B/MFSD1/GRN/SURF4/M6PR/CTSA/B4GALT1/CUBN/ARL8B/KIF5B/SYNGR1/LAPTM4B/TMEM192/TMEM9B/SLC3A2/NEU1…	68
GO:0005788	CC	GO:0005788	endoplasmic reticulum lumen	56/1097	311/19594	6.03e-15	6.18e-13	3.98e-13	APLP2/APP/CANX/SPP1/HSP90B1/KNG1/CALR/CST3/IGFBP7/COL18A1/COL6A1/KTN1/TGOLN2/THBS1/PPIB/GPC3/COL4A3/PDIA6/MGAT4A/COL4A4/RCN2/SERPING1/COL4A2/GOLM1/SIL1/HSPA5/DNAJC10/GAS6/CTSC/LAMB1/PDIA4/ADAM10/HYOU1/ARSD/SELENOF/PDIA3/DNAJC3/DNAJB9/TSPAN14/LRPAP1/P4HB/MAPK1/NUCB1/SDC2/COL4A1/SUMF2/CALU/OS9/MYDGF/MBTPS1/PRKCSH/ERLEC1/PNPLA2/PDGFA/MANF/CRTAP	56
GO:0140534	CC	GO:0140534	endoplasmic reticulum protein-containing complex	33/1097	125/19594	3.65e-14	3.2e-12	2.06e-12	HSP90B1/CALR/PPIB/AMFR/PDIA6/MAGT1/SPCS2/STT3B/SEL1L/ARL6IP1/RPN1/HSPA5/DNAJC10/SPTLC1/KRTCAP2/RPN2/SSR4/SELENOS/TUSC3/HYOU1/EMC10/PDIA3/GPAA1/SEC63/SPCS3/P4HB/OS9/HSD17B12/HLA-A/MLEC/PRKCSH/HM13/ORMDL1	33
GO:0042470	CC	GO:0042470	melanosome	29/1097	109/19594	1.04e-12	7.08e-11	4.56e-11	ATP1A1/CANX/HSP90B1/CTSD/BSG/ITGB1/PPIB/TMED10/CLTC/GPNMB/PDIA6/LAMP1/SYPL1/TMEM33/RPN1/HSPA5/PDIA4/SEC22B/PDIA3/CD63/P4HB/CTSB/SLC1A5/SYNGR1/CALU/ATP1B3/SLC3A2/PDCD6IP/YWHAZ	29
GO:0048770	CC	GO:0048770	pigment granule	29/1097	109/19594	1.04e-12	7.08e-11	4.56e-11	ATP1A1/CANX/HSP90B1/CTSD/BSG/ITGB1/PPIB/TMED10/CLTC/GPNMB/PDIA6/LAMP1/SYPL1/TMEM33/RPN1/HSPA5/PDIA4/SEC22B/PDIA3/CD63/P4HB/CTSB/SLC1A5/SYNGR1/CALU/ATP1B3/SLC3A2/PDCD6IP/YWHAZ	29
GO:0045177	CC	GO:0045177	apical part of cell	63/1097	424/19594	1.15e-12	7.08e-11	4.56e-11	ATP1A1/ATP1B1/SLC12A1/UMOD/APP/MUC1/SCNN1A/CLCN5/CTNNB1/GP2/PROM2/MAL/ATP6V1A/OCLN/CASR/CLCN3/IGFBP2/PKHD1/LMO7/JAG1/ERBB2/MTDH/SLC3A1/TMEM30A/CA4/ATP6AP2/FZD6/ATP2B1/FOLR1/SHANK2/PAPPA2/FAT1/HPN/ATP1B2/EPCAM/CHL1/PCM1/PATJ/CTSL/PTH1R/ANK2/SLC38A1/SLC4A2/BST2/HIP1R/ATP6V0A4/PRKCI/LGMN/SLC7A8/CLDN4/CUBN/CTSB/KL/EZR/TJP1/ATP1B3/SLC3A2/AHCYL1/MARVELD2/PRKAA1/MAL2/RDX/CDC42	63
GO:0005793	CC	GO:0005793	endoplasmic reticulum-Golgi intermediate compartment	31/1097	131/19594	5.06e-12	2.83e-10	1.82e-10	MAN1A1/CALR/LMAN1/TMED2/CD59/TMED7/TMED10/PDIA6/ATP6AP1/MGAT4A/BCAP31/CA4/GOLGB1/FOLR1/SPPL3/HSPA5/TMED4/CTSC/VMP1/SEC22B/IST1/LRPAP1/P4HB/NUCB1/TRIP11/SURF4/MYDGF/VMA21/TMED9/RER1/COPG1	31
GO:0016324	CC	GO:0016324	apical plasma membrane	55/1097	358/19594	8.48e-12	4.35e-10	2.8e-10	ATP1A1/ATP1B1/SLC12A1/UMOD/MUC1/SCNN1A/GP2/PROM2/MAL/ATP6V1A/OCLN/CASR/CLCN3/IGFBP2/PKHD1/LMO7/JAG1/ERBB2/MTDH/SLC3A1/TMEM30A/CA4/ATP6AP2/FZD6/ATP2B1/FOLR1/SHANK2/PAPPA2/FAT1/HPN/ATP1B2/EPCAM/PATJ/CTSL/PTH1R/ANK2/SLC38A1/SLC4A2/BST2/HIP1R/ATP6V0A4/PRKCI/SLC7A8/CLDN4/CUBN/CTSB/KL/EZR/ATP1B3/SLC3A2/AHCYL1/MARVELD2/PRKAA1/MAL2/RDX	55
GO:0045178	CC	GO:0045178	basal part of cell	46/1097	269/19594	1.06e-11	5.03e-10	3.23e-10	ATP1A1/ATP1B1/UMOD/KCNJ16/CDH16/CD81/SLC16A12/BSG/ERBB4/CTNNB1/PROM2/CASR/CADM1/ERBB2/PRCP/PKD2/DST/ANK3/ATP2B1/FOLR1/KCNJ10/ITGA2/EPCAM/DSP/CXADR/ERBIN/PTH1R/ANK2/SLC38A1/SLC4A2/CLDN19/SLC4A4/PHLDB2/SLC7A8/CLDN4/B4GALT1/TACSTD2/SLC1A5/EZR/TJP1/ATP1B3/SLC3A2/CLDN7/MAP7/MARVELD2/CASK	46
GO:0030135	CC	GO:0030135	coated vesicle	48/1097	290/19594	1.26e-11	5.53e-10	3.56e-10	EGF/APP/CD9/LMAN1/TMED2/LMBRD1/CD59/TGOLN2/TMED7/TMED10/CLTC/SREBF1/IGF2R/BCAP31/SGIP1/FOLR1/TMED4/SORT1/CTSC/SCAMP1/MYO6/AP1G1/ADAM10/HIP1/SAR1A/SEC22B/AFTPH/HIP1R/SCARB2/COPA/HLA-C/DENND1B/M6PR/HLA-E/SAR1B/KDELR2/VMA21/TMED9/HLA-A/SEC31A/YIPF5/GGA2/AP3B1/PIK3C2A/AP2B1/AP2A2/HLA-B/COPG1	48
GO:0030176	CC	GO:0030176	integral component of endoplasmic reticulum membrane	34/1097	164/19594	2.5e-11	1.02e-09	6.59e-10	CANX/CALR/RTN4/KTN1/HACD3/SPPL2A/TMCO1/AMFR/PKD2/ZMPSTE24/BCAP31/TRAM1/ARL6IP1/RRBP1/TMEM33/SPPL3/HSPA5/DPM3/CCDC47/SGMS2/SELENOS/SGMS1/EMC10/PDIA3/GPAA1/HLA-C/HLA-E/TECR/BSCL2/SARAF/SEC62/HLA-A/HM13/HLA-B	34
GO:0030662	CC	GO:0030662	coated vesicle membrane	35/1097	176/19594	4.38e-11	1.68e-09	1.08e-09	EGF/CD9/LMAN1/TMED2/CD59/TGOLN2/TMED7/TMED10/CLTC/SREBF1/IGF2R/SGIP1/FOLR1/MYO6/AP1G1/HIP1/SAR1A/SEC22B/AFTPH/HIP1R/SCARB2/COPA/HLA-C/M6PR/HLA-E/SAR1B/KDELR2/VMA21/HLA-A/SEC31A/AP3B1/AP2B1/AP2A2/HLA-B/COPG1	35
GO:0009925	CC	GO:0009925	basal plasma membrane	43/1097	251/19594	4.72e-11	1.69e-09	1.09e-09	ATP1A1/ATP1B1/UMOD/KCNJ16/CDH16/CD81/SLC16A12/BSG/ERBB4/CTNNB1/PROM2/CASR/CADM1/ERBB2/PKD2/DST/ANK3/ATP2B1/FOLR1/KCNJ10/EPCAM/DSP/CXADR/ERBIN/PTH1R/ANK2/SLC38A1/SLC4A2/CLDN19/SLC4A4/SLC7A8/CLDN4/B4GALT1/TACSTD2/SLC1A5/EZR/TJP1/ATP1B3/SLC3A2/CLDN7/MAP7/MARVELD2/CASK	43
GO:0098791	CC	GO:0098791	Golgi apparatus subcompartment	56/1097	385/19594	4.94e-11	1.69e-09	1.09e-09	TMEM59/APP/TMBIM4/WLS/GOLIM4/TMED2/AKAP9/TGOLN2/ATP2C1/SORL1/CLTC/BACE2/GOLGA8B/IGF2R/GOLGA8A/CDH1/MGAT4A/PREPL/BCAP31/BIRC6/CA4/MAN2A1/GOLGB1/UXS1/SORT1/SCAMP1/AP1G1/TMEM165/GOLPH3/ARFGEF2/FLNA/WDR11/SGMS1/ZDHHC14/RHOBTB3/STX16/AFTPH/GOLGA4/PAM/YIPF4/GRN/M6PR/B4GALT1/FAM91A1/PRKD1/SAR1B/ASAP2/MBTPS1/GCC2/HLA-A/ARFGEF1/RAB21/YIPF5/GGA2/CHID1/PIK3C2A	56
GO:0030667	CC	GO:0030667	secretory granule membrane	49/1097	312/19594	5.32e-11	1.7e-09	1.09e-09	APLP2/CD9/ATP6V0C/BSG/PLAU/PSAP/CD46/GP2/TMED2/CD59/ITPR1/CD47/ITPR2/TMED10/CMTM6/SERPINA5/MAGT1/LAMP1/IQGAP1/PRCP/IGF2R/TMEM30A/CA4/ATP6AP2/SLC44A2/RAP2C/ITGAV/VPS13C/LAMP2/SCAMP1/DSP/ADAM10/DIAPH1/CD63/BST2/PGRMC1/PAM/TSPAN14/TMEM179B/TRIP11/HLA-C/SURF4/B4GALT1/ANO6/SYNGR1/MLEC/AGPAT2/AP2A2/HLA-B	49
GO:0005911	CC	GO:0005911	cell-cell junction	66/1097	497/19594	5.52e-11	1.7e-09	1.09e-09	ATP1B1/APP/CLDN16/CTNNB1/CGNL1/PCDH9/ITGB1/OCLN/CADM1/VEGFA/WNK4/DSG2/CLDN10/JAG1/OBSL1/IQGAP1/MTDH/CDH1/PKD2/CTNND1/ANK3/RAP2C/PKP4/FAT1/PKN2/HPN/ASH1L/EPCAM/DSP/AHNAK/CXADR/PATJ/ADAM10/ANK2/AMOTL2/FLNA/JUP/UBA1/VCL/CLDN19/MAGI1/PRKCI/KLHL24/ADD3/AFDN/CLDN4/B4GALT1/PRKD1/PERP/EZR/TJP1/EPB41L3/CLDN3/CLDN7/MYH9/PDCD6IP/ABI2/MARVELD2/KIFC3/EPB41L5/NDRG1/RDX/CDC42/PNN/WDR1/CASK	66
GO:0043202	CC	GO:0043202	lysosomal lumen	25/1097	97/19594	8.04e-11	2.35e-09	1.51e-09	CTSD/PSAP/SDC4/GPC3/IFI30/AGRN/GNS/LAMP2/IDS/CTSL/CTSF/GLB1/SCARB2/LGMN/LIPA/ASAH1/SDC1/PPT1/SDC2/CTSA/CUBN/CTSB/NAAA/NEU1/CHID1	25
GO:0031227	CC	GO:0031227	intrinsic component of endoplasmic reticulum membrane	34/1097	172/19594	9.82e-11	2.75e-09	1.77e-09	CANX/CALR/RTN4/KTN1/HACD3/SPPL2A/TMCO1/AMFR/PKD2/ZMPSTE24/BCAP31/TRAM1/ARL6IP1/RRBP1/TMEM33/SPPL3/HSPA5/DPM3/CCDC47/SGMS2/SELENOS/SGMS1/EMC10/PDIA3/GPAA1/HLA-C/HLA-E/TECR/BSCL2/SARAF/SEC62/HLA-A/HM13/HLA-B	34
GO:0005775	CC	GO:0005775	vacuolar lumen	34/1097	174/19594	1.36e-10	3.65e-09	2.35e-09	CTSD/PSAP/SDC4/GPC3/IFI30/NHLRC3/AGRN/GNS/LAMP2/CTSC/IDS/CTSL/CTSF/IST1/DNAJC3/GLB1/SCARB2/LGMN/LIPA/CYB5R3/ASAH1/SDC1/GRN/MAPK1/PPT1/SDC2/CTSA/CUBN/CTSB/DYNC1H1/DPP7/NAAA/NEU1/CHID1	34
GO:0016323	CC	GO:0016323	basolateral plasma membrane	39/1097	226/19594	3.01e-10	7.71e-09	4.96e-09	ATP1A1/ATP1B1/UMOD/KCNJ16/CDH16/CD81/SLC16A12/BSG/ERBB4/CTNNB1/PROM2/CASR/CADM1/ERBB2/PKD2/ANK3/ATP2B1/FOLR1/KCNJ10/EPCAM/DSP/CXADR/ERBIN/PTH1R/ANK2/SLC38A1/SLC4A2/CLDN19/SLC4A4/SLC7A8/B4GALT1/EZR/TJP1/ATP1B3/SLC3A2/CLDN7/MAP7/MARVELD2/CASK	39
GO:0031301	CC	GO:0031301	integral component of organelle membrane	54/1097	382/19594	3.23e-10	7.95e-09	5.11e-09	ITM2B/CANX/CALR/WLS/RTN4/KTN1/HACD3/SPPL2A/ATP2C1/TMCO1/AMFR/PKD2/ZMPSTE24/BCAP31/TRAM1/SYPL1/ARL6IP1/RRBP1/TMEM33/ATP2B1/SPPL3/HSPA5/LAMP2/DPM3/SCAMP1/CCDC47/SGMS2/SUN1/SELENOS/SGMS1/LBR/EMC10/PDIA3/SLC35A3/GPAA1/UNC50/SLC39A13/MTLN/HLA-C/SYNGR1/RHOT2/ARMCX3/HLA-E/TECR/BSCL2/SARAF/FAR1/SEC62/HLA-A/MAL2/HM13/RER1/DNAJC11/HLA-B	54
GO:0016607	CC	GO:0016607	nuclear speck	56/1097	411/19594	6.2e-10	1.47e-08	9.44e-09	DDX17/MECOM/PNISR/SRSF6/HSPA1B/PRKAA2/RBM25/HECTD1/SFPQ/WTAP/PLCB1/LUC7L3/DAZAP2/PCBP1/ERBIN/CCNL1/HNRNPU/BCLAF1/BRD2/TMEM179B/CARMIL1/HIPK1/DHX15/PIAS2/AFDN/SF3B1/DYRK1A/SNRNP70/TRIP11/THOC2/DENND1B/SREK1/PRPF4B/CDK12/SRSF11/ZC3H13/DOCK1/KMT2E/ZNF638/CCNL2/TRIP12/NRIP1/MEF2C/MAML2/HIF1A/JADE1/SRRM2/PRPF8/YTHDC1/PRKAA1/WAC/PNN/DNAJC11/LUC7L2/CSNK1A1/HSPA1A	56
GO:0031300	CC	GO:0031300	intrinsic component of organelle membrane	54/1097	412/19594	5.08e-09	1.16e-07	7.44e-08	ITM2B/CANX/CALR/WLS/RTN4/KTN1/HACD3/SPPL2A/ATP2C1/TMCO1/AMFR/PKD2/ZMPSTE24/BCAP31/TRAM1/SYPL1/ARL6IP1/RRBP1/TMEM33/ATP2B1/SPPL3/HSPA5/LAMP2/DPM3/SCAMP1/CCDC47/SGMS2/SUN1/SELENOS/SGMS1/LBR/EMC10/PDIA3/SLC35A3/GPAA1/UNC50/SLC39A13/MTLN/HLA-C/SYNGR1/RHOT2/ARMCX3/HLA-E/TECR/BSCL2/SARAF/FAR1/SEC62/HLA-A/MAL2/HM13/RER1/DNAJC11/HLA-B	54
GO:0010494	CC	GO:0010494	cytoplasmic stress granule	20/1097	79/19594	8.67e-09	1.91e-07	1.23e-07	CELF1/PRKAA2/ZFP36/TIA1/YTHDF3/FMR1/PRRC2C/PUM2/G3BP1/PUM1/LARP4/NUFIP2/MBNL1/CAPRIN1/EIF4G1/ELAVL1/LARP1/TIAL1/DDX3X/TARDBP	20
GO:0043296	CC	GO:0043296	apical junction complex	28/1097	148/19594	1.21e-08	2.56e-07	1.65e-07	CLDN16/CTNNB1/CGNL1/OCLN/WNK4/CLDN10/MTDH/CDH1/CTNND1/ANK3/RAP2C/PKN2/ASH1L/EPCAM/CXADR/PATJ/AMOTL2/JUP/CLDN19/MAGI1/PRKCI/CLDN4/TJP1/CLDN3/CLDN7/PDCD6IP/MARVELD2/KIFC3	28
GO:0030133	CC	GO:0030133	transport vesicle	51/1097	402/19594	3.99e-08	7.98e-07	5.14e-07	APP/CLCN5/LMAN1/GOLIM4/TMED2/CD59/TGOLN2/ATP6V1A/ITPR1/CLCN3/TMED7/SORL1/FGFR3/TMED10/CLTC/LAMP1/SREBF1/IGF2R/TMEM30A/SYPL1/CA4/ATP2B1/FOLR1/SORT1/SCAMP1/AP1G1/SYNGR2/SAR1A/SEC22B/AFTPH/PAM/COPA/PPT1/TRIP11/HLA-C/SURF4/M6PR/SYNGR1/HLA-E/SAR1B/RABAC1/KDELR2/VMA21/TMED9/HLA-A/SEC31A/MAL2/RAB3IP/HLA-B/COPG1/SEPTIN6	51
GO:0030134	CC	GO:0030134	COPII-coated ER to Golgi transport vesicle	21/1097	94/19594	4.02e-08	7.98e-07	5.14e-07	APP/LMAN1/TMED2/CD59/TMED7/TMED10/SREBF1/FOLR1/TMED4/CTSC/SAR1A/SEC22B/HLA-C/HLA-E/SAR1B/VMA21/TMED9/HLA-A/SEC31A/YIPF5/HLA-B	21
GO:0031252	CC	GO:0031252	cell leading edge	52/1097	416/19594	4.79e-08	9.21e-07	5.93e-07	APP/CTNNB1/INSR/ITGB1/SPTBN1/OCLN/CLCN3/SYNE2/MYLK/IQGAP1/CDH1/PKD2/CTNND1/DST/ATP6AP2/ATP2B1/SLC39A6/NCKAP1/ITGAV/FAT1/PKN2/PLEKHH2/SLK/MYO6/MKLN1/MACF1/DIAPH1/TRPM7/CLIP1/C2CD5/HIP1R/PTPN13/PRKCI/MYH10/ABLIM1/KITLG/P4HB/CARMIL1/PHLDB2/EPS8L2/EZR/EPB41L3/CAPRIN1/MYH9/NEDD9/ABI2/EPB41L5/RDX/RAB3IP/WWC1/CDC42/DDX3X	52
GO:0005798	CC	GO:0005798	Golgi-associated vesicle	19/1097	84/19594	1.43e-07	2.67e-06	1.72e-06	ITM2B/APP/TMED2/TGOLN2/TMED7/SPPL2A/TMED10/CLTC/IGF2R/SPPL3/SORT1/AP1G1/ADAM10/AFTPH/COPA/KDELR2/TMED9/COPG1/RHOQ	19
GO:0005770	CC	GO:0005770	late endosome	39/1097	283/19594	1.85e-07	3.34e-06	2.15e-06	TMEM59/PSAP/INSR/TMEM106B/CLCN3/SPPL2A/SORL1/PRKAR1A/ABCA5/KIDINS220/LAMP1/IGF2R/LAPTM4A/TMEM30A/SNX14/LAMP2/NEDD4L/SDF4/CTSL/TMEM9/TMEM165/RNF13/CD63/BST2/ATP13A3/SCARB2/LGMN/GRN/MAPK1/M6PR/ARL8B/LAPTM4B/TMEM192/NDFIP2/DYNC1LI2/IFNAR1/CHID1/AP5M1/RHOB	39
GO:0012507	CC	GO:0012507	ER to Golgi transport vesicle membrane	16/1097	62/19594	1.99e-07	3.5e-06	2.25e-06	LMAN1/TMED2/CD59/TMED7/TMED10/SREBF1/FOLR1/SAR1A/SEC22B/HLA-C/HLA-E/SAR1B/VMA21/HLA-A/SEC31A/HLA-B	16
GO:0071556	CC	GO:0071556	integral component of lumenal side of endoplasmic reticulum membrane	11/1097	29/19594	2.19e-07	3.63e-06	2.34e-06	CANX/CALR/SPPL2A/PKD2/BCAP31/SPPL3/HLA-C/HLA-E/HLA-A/HM13/HLA-B	11
GO:0098553	CC	GO:0098553	lumenal side of endoplasmic reticulum membrane	11/1097	29/19594	2.19e-07	3.63e-06	2.34e-06	CANX/CALR/SPPL2A/PKD2/BCAP31/SPPL3/HLA-C/HLA-E/HLA-A/HM13/HLA-B	11
GO:0098576	CC	GO:0098576	lumenal side of membrane	12/1097	35/19594	2.24e-07	3.63e-06	2.34e-06	CANX/CALR/SPPL2A/PKD2/BCAP31/SPPL3/HLA-C/CTSA/HLA-E/HLA-A/HM13/HLA-B	12
GO:0070160	CC	GO:0070160	tight junction	24/1097	132/19594	2.85e-07	4.5e-06	2.9e-06	CLDN16/CTNNB1/CGNL1/OCLN/WNK4/CLDN10/MTDH/ANK3/RAP2C/ASH1L/EPCAM/CXADR/PATJ/AMOTL2/CLDN19/MAGI1/PRKCI/AFDN/CLDN4/TJP1/CLDN3/CLDN7/PDCD6IP/MARVELD2	24
GO:0005923	CC	GO:0005923	bicellular tight junction	23/1097	124/19594	3.47e-07	5.33e-06	3.43e-06	CLDN16/CTNNB1/CGNL1/OCLN/WNK4/CLDN10/MTDH/ANK3/RAP2C/ASH1L/EPCAM/CXADR/PATJ/AMOTL2/CLDN19/MAGI1/PRKCI/CLDN4/TJP1/CLDN3/CLDN7/PDCD6IP/MARVELD2	23
GO:0034663	CC	GO:0034663	endoplasmic reticulum chaperone complex	7/1097	11/19594	4.58e-07	6.75e-06	4.34e-06	HSP90B1/PPIB/PDIA6/HSPA5/DNAJC10/HYOU1/P4HB	7
GO:0005766	CC	GO:0005766	primary lysosome	26/1097	155/19594	4.79e-07	6.75e-06	4.34e-06	ATP6V0C/PSAP/CMTM6/MAGT1/LAMP1/PRCP/NHLRC3/TMEM30A/GNS/LAMP2/CTSC/IST1/CD63/DNAJC3/GLB1/BST2/TMEM179B/CYB5R3/GRN/MAPK1/SURF4/CTSA/B4GALT1/DYNC1H1/SYNGR1/DPP7	26
GO:0042582	CC	GO:0042582	azurophil granule	26/1097	155/19594	4.79e-07	6.75e-06	4.34e-06	ATP6V0C/PSAP/CMTM6/MAGT1/LAMP1/PRCP/NHLRC3/TMEM30A/GNS/LAMP2/CTSC/IST1/CD63/DNAJC3/GLB1/BST2/TMEM179B/CYB5R3/GRN/MAPK1/SURF4/CTSA/B4GALT1/DYNC1H1/SYNGR1/DPP7	26
GO:0005802	CC	GO:0005802	trans-Golgi network	36/1097	260/19594	4.83e-07	6.75e-06	4.34e-06	APP/WLS/TGOLN2/ATP2C1/SORL1/CLTC/BACE2/IGF2R/CDH1/PREPL/BIRC6/CA4/SCAMP1/AP1G1/TMEM165/GOLPH3/ARFGEF2/FLNA/WDR11/RHOBTB3/STX16/AFTPH/GOLGA4/PAM/YIPF4/GRN/M6PR/FAM91A1/PRKD1/GCC2/ARFGEF1/RAB21/YIPF5/GGA2/CHID1/PIK3C2A	36
GO:0033116	CC	GO:0033116	endoplasmic reticulum-Golgi intermediate compartment membrane	17/1097	77/19594	9.3e-07	1.27e-05	8.18e-06	CALR/LMAN1/TMED2/CD59/TMED7/TMED10/ATP6AP1/BCAP31/FOLR1/SPPL3/CTSC/VMP1/SEC22B/TRIP11/SURF4/VMA21/TMED9	17
GO:0005795	CC	GO:0005795	Golgi stack	25/1097	153/19594	1.31e-06	1.75e-05	1.12e-05	TMEM59/TMBIM4/GOLIM4/TMED2/AKAP9/ATP2C1/SORL1/GOLGA8B/GOLGA8A/MGAT4A/BCAP31/MAN2A1/GOLGB1/UXS1/SORT1/GOLPH3/SGMS1/ZDHHC14/STX16/B4GALT1/SAR1B/ASAP2/MBTPS1/HLA-A/RAB21	25
GO:0030658	CC	GO:0030658	transport vesicle membrane	30/1097	205/19594	1.34e-06	1.75e-05	1.12e-05	LMAN1/TMED2/CD59/ITPR1/TMED7/SORL1/TMED10/CLTC/SREBF1/TMEM30A/SYPL1/CA4/ATP2B1/FOLR1/SCAMP1/AP1G1/SYNGR2/SAR1A/SEC22B/AFTPH/PAM/HLA-C/SYNGR1/HLA-E/SAR1B/VMA21/HLA-A/SEC31A/MAL2/HLA-B	30
GO:0005791	CC	GO:0005791	rough endoplasmic reticulum	17/1097	79/19594	1.36e-06	1.75e-05	1.12e-05	APP/CANX/PLOD2/RPS28/CA4/ARL6IP1/SPPL3/RPN1/CCDC47/RPN2/SSR4/UBA1/SEC63/RPS21/LRPAP1/SEC62/HM13	17
GO:0044291	CC	GO:0044291	cell-cell contact zone	16/1097	71/19594	1.45e-06	1.82e-05	1.17e-05	ATP1B1/CTNNB1/PCDH9/ITGB1/DSG2/OBSL1/ANK3/RAP2C/PKP4/DSP/AHNAK/CXADR/ANK2/JUP/VCL/AFDN	16
GO:0005938	CC	GO:0005938	cell cortex	39/1097	310/19594	1.92e-06	2.36e-05	1.52e-05	CTNNB1/SPTBN1/SCIN/ACTN4/ITPR2/IQGAP1/CDH1/PKD2/CTNND1/DST/FLNB/PLEKHH2/MYO6/MKLN1/UTRN/ASPH/NDFIP1/C2CD5/SPTAN1/FLNA/RHOBTB3/HIP1R/ADD3/MYH10/CTBP1/PHLDB2/DYNC1H1/PRKD1/EZR/SEPTIN11/MYH9/LLGL2/NEDD9/CRIP2/DCTN4/RDX/WDR1/RHOB/SEPTIN6	39
GO:0035577	CC	GO:0035577	azurophil granule membrane	14/1097	58/19594	2.74e-06	3.3e-05	2.12e-05	ATP6V0C/PSAP/CMTM6/MAGT1/LAMP1/PRCP/TMEM30A/LAMP2/CD63/BST2/TMEM179B/SURF4/B4GALT1/SYNGR1	14
GO:0008250	CC	GO:0008250	oligosaccharyltransferase complex	7/1097	14/19594	4.1e-06	4.85e-05	3.12e-05	MAGT1/STT3B/RPN1/KRTCAP2/RPN2/TUSC3/MLEC	7
GO:0030057	CC	GO:0030057	desmosome	9/1097	25/19594	4.73e-06	5.48e-05	3.53e-05	DSG2/PKP4/DSP/JUP/UBA1/KLHL24/B4GALT1/PERP/PNN	9
GO:0036464	CC	GO:0036464	cytoplasmic ribonucleoprotein granule	32/1097	243/19594	6.06e-06	6.9e-05	4.44e-05	ZFP36L1/CELF1/PRKAA2/ZFP36/IQGAP1/TIA1/TNRC6A/TNRC6B/PCBP1/YTHDF3/FMR1/PRRC2C/HNRNPU/PUM2/HELZ/SYNE1/G3BP1/PUM1/LARP4/NUFIP2/MBNL1/XRN1/CAPRIN1/UHMK1/EIF4G1/ELAVL1/LARP1/TUT4/TIAL1/CDC42/DDX3X/TARDBP	32
GO:0005635	CC	GO:0005635	nuclear envelope	51/1097	479/19594	8.09e-06	9.04e-05	5.82e-05	APP/CALR/TMX4/RTN4/INSR/TMEM38B/HACD3/ITPR1/SYNE2/SORL1/DNASE1/LMO7/SREBF1/IGF2R/MTDH/NELL1/ZMPSTE24/DST/PTGER3/RANBP2/XPO1/WTAP/TMEM33/PLCB1/TNRC18/OSBPL3/HPN/SORT1/CLMN/MYO6/GNAQ/PCM1/ERBIN/RNF43/SUN1/RNF13/LBR/IST1/PUM2/UNC50/TRA2B/TNKS2/SYNE1/LRPPRC/SPIN1/NUP58/ANKRD17/DNAJB14/MGST2/IPO7/UBXN4	51
GO:0030139	CC	GO:0030139	endocytic vesicle	40/1097	342/19594	8.63e-06	9.48e-05	6.1e-05	EGF/HSP90B1/CD9/ATP6V0B/ATP6V0C/CALR/WLS/GOLIM4/LMBRD1/TGOLN2/OCLN/CLCN3/CLTC/LAMP1/IGF2R/SGIP1/ITGAV/FLNB/LAMP2/MYO6/CTSL/HYOU1/SEC22B/PDIA3/ATP6V0A4/SCARB2/ITGB5/HLA-C/M6PR/CUBN/KIF5B/HLA-E/RIN2/HLA-A/STXBP4/CDC42/AP2B1/AP2A2/HLA-B/RAB11FIP3	40
GO:0030136	CC	GO:0030136	clathrin-coated vesicle	27/1097	192/19594	9.47e-06	0.00010214	6.57e-05	EGF/CD9/LMBRD1/TGOLN2/TMED10/CLTC/IGF2R/BCAP31/SGIP1/FOLR1/SORT1/SCAMP1/MYO6/AP1G1/ADAM10/HIP1/AFTPH/HIP1R/SCARB2/DENND1B/M6PR/TMED9/GGA2/AP3B1/PIK3C2A/AP2B1/AP2A2	27
GO:0031985	CC	GO:0031985	Golgi cisterna	20/1097	120/19594	1.08e-05	0.00011462	7.38e-05	TMEM59/GOLIM4/TMED2/ATP2C1/SORL1/GOLGA8B/GOLGA8A/BCAP31/MAN2A1/UXS1/SORT1/GOLPH3/SGMS1/ZDHHC14/STX16/B4GALT1/SAR1B/ASAP2/HLA-A/RAB21	20
GO:0101002	CC	GO:0101002	ficolin-1-rich granule	26/1097	185/19594	1.39e-05	0.00014499	9.33e-05	ATP6V0C/CTSD/CST3/HSPA1B/LAMP1/PRCP/ATP6AP2/FGL2/GNS/LAMP2/DSP/DIAPH1/JUP/HUWE1/GLB1/VCL/AGL/TMEM179B/ASAH1/MAPK1/CAND1/CTSB/PFKL/DDX3X/AP2A2/HSPA1A	26
GO:0030120	CC	GO:0030120	vesicle coat	12/1097	52/19594	2.29e-05	0.00023119	0.00014879	TMED7/CLTC/SGIP1/AP1G1/SAR1A/AFTPH/COPA/SAR1B/SEC31A/AP2B1/AP2A2/COPG1	12
GO:0030660	CC	GO:0030660	Golgi-associated vesicle membrane	12/1097	52/19594	2.29e-05	0.00023119	0.00014879	ITM2B/TMED2/TMED7/SPPL2A/CLTC/SPPL3/AP1G1/AFTPH/COPA/KDELR2/COPG1/RHOQ	12
GO:0035770	CC	GO:0035770	ribonucleoprotein granule	32/1097	261/19594	2.64e-05	0.00026143	0.00016825	ZFP36L1/CELF1/PRKAA2/ZFP36/IQGAP1/TIA1/TNRC6A/TNRC6B/PCBP1/YTHDF3/FMR1/PRRC2C/HNRNPU/PUM2/HELZ/SYNE1/G3BP1/PUM1/LARP4/NUFIP2/MBNL1/XRN1/CAPRIN1/UHMK1/EIF4G1/ELAVL1/LARP1/TUT4/TIAL1/CDC42/DDX3X/TARDBP	32
GO:0120111	CC	GO:0120111	neuron projection cytoplasm	16/1097	89/19594	3.09e-05	0.00030156	0.00019407	CANX/DST/SFPQ/FMR1/HNRNPU/PURA/HIP1R/ARL8B/DYNC1H1/KIF5B/ARMCX3/UHMK1/HIF1A/OPA1/RAB21/AP3B1	16
GO:0031902	CC	GO:0031902	late endosome membrane	22/1097	152/19594	3.95e-05	0.00037953	0.00024425	TMEM59/TMEM106B/CLCN3/SPPL2A/SORL1/ABCA5/LAMP1/LAPTM4A/TMEM30A/SNX14/LAMP2/TMEM9/TMEM165/RNF13/CD63/ATP13A3/SCARB2/ARL8B/LAPTM4B/NDFIP2/AP5M1/RHOB	22
GO:0016328	CC	GO:0016328	lateral plasma membrane	13/1097	64/19594	4.5e-05	0.00042586	0.00027407	ATP1A1/ATP1B1/CTNNB1/IQGAP1/CDH1/ANK3/ATP1B2/EPCAM/JUP/CLDN4/TACSTD2/CLDN3/PPP2R1A	13
GO:0030117	CC	GO:0030117	membrane coat	15/1097	84/19594	5.88e-05	0.00053958	0.00034725	TMED7/CLTC/IGF2R/SGIP1/AP1G1/SAR1A/AFTPH/COPA/SAR1B/SEC31A/AP3B1/AP5M1/AP2B1/AP2A2/COPG1	15
GO:0048475	CC	GO:0048475	coated membrane	15/1097	84/19594	5.88e-05	0.00053958	0.00034725	TMED7/CLTC/IGF2R/SGIP1/AP1G1/SAR1A/AFTPH/COPA/SAR1B/SEC31A/AP3B1/AP5M1/AP2B1/AP2A2/COPG1	15
GO:0098554	CC	GO:0098554	cytoplasmic side of endoplasmic reticulum membrane	6/1097	14/19594	6.18e-05	0.00055472	0.000357	SPPL2A/PKD2/RPS28/SPPL3/EPM2AIP1/HM13	6
GO:0034774	CC	GO:0034774	secretory granule lumen	36/1097	322/19594	6.22e-05	0.00055472	0.000357	EGF/APP/KNG1/CTSD/THBS1/VEGFA/ACTN4/NHLRC3/LGALS3BP/SERPING1/GNS/GAS6/VPS13A/CTSC/TEX264/SPTAN1/JUP/HUWE1/IST1/DNAJC3/GLB1/VCL/AGL/CYB5R3/GRN/MAPK1/CAND1/CTSA/DYNC1H1/PFKL/DPP7/FAM3C/RARRES2/NEU1/DDX3X/PDGFA	36
GO:0030027	CC	GO:0030027	lamellipodium	26/1097	202/19594	6.47e-05	0.00056851	0.00036587	APP/CTNNB1/ITGB1/SYNE2/MYLK/CDH1/PKD2/CTNND1/SLC39A6/NCKAP1/ITGAV/FAT1/PKN2/PLEKHH2/PTPN13/MYH10/ABLIM1/KITLG/P4HB/CARMIL1/CAPRIN1/NEDD9/ABI2/RDX/RAB3IP/DDX3X	26
GO:0014704	CC	GO:0014704	intercalated disc	11/1097	49/19594	6.57e-05	0.00056918	0.0003663	ATP1B1/CTNNB1/ITGB1/DSG2/OBSL1/ANK3/DSP/CXADR/ANK2/JUP/VCL	11
GO:0016327	CC	GO:0016327	apicolateral plasma membrane	7/1097	20/19594	6.88e-05	0.00058779	0.00037828	CTNNB1/OCLN/FZD6/CXADR/JUP/CLDN4/CLDN3	7
GO:0030175	CC	GO:0030175	filopodium	17/1097	105/19594	7.08e-05	0.00059632	0.00038376	APP/ITGB1/SYNE2/ITGAV/OSBPL3/FAT1/MYO6/UTRN/CXADR/FMR1/KITLG/B4GALT1/DYNC1H1/EZR/ABI2/RDX/CDC42	17
GO:0060205	CC	GO:0060205	cytoplasmic vesicle lumen	36/1097	325/19594	7.54e-05	0.00062646	0.00040317	EGF/APP/KNG1/CTSD/THBS1/VEGFA/ACTN4/NHLRC3/LGALS3BP/SERPING1/GNS/GAS6/VPS13A/CTSC/TEX264/SPTAN1/JUP/HUWE1/IST1/DNAJC3/GLB1/VCL/AGL/CYB5R3/GRN/MAPK1/CAND1/CTSA/DYNC1H1/PFKL/DPP7/FAM3C/RARRES2/NEU1/DDX3X/PDGFA	36
GO:0031983	CC	GO:0031983	vesicle lumen	36/1097	327/19594	8.55e-05	0.00070099	0.00045113	EGF/APP/KNG1/CTSD/THBS1/VEGFA/ACTN4/NHLRC3/LGALS3BP/SERPING1/GNS/GAS6/VPS13A/CTSC/TEX264/SPTAN1/JUP/HUWE1/IST1/DNAJC3/GLB1/VCL/AGL/CYB5R3/GRN/MAPK1/CAND1/CTSA/DYNC1H1/PFKL/DPP7/FAM3C/RARRES2/NEU1/DDX3X/PDGFA	36
GO:0016528	CC	GO:0016528	sarcoplasm	14/1097	78/19594	9.7e-05	0.00078522	0.00050534	HSP90B1/CALR/TMEM38B/THBS1/ITPR1/SYNE2/ITPR2/ATP2A2/ANK3/ASPH/AGL/CALU/MEF2C/MANF	14
GO:0000220	CC	GO:0000220	vacuolar proton-transporting V-type ATPase, V0 domain	5/1097	10/19594	0.00010841	0.00086587	0.00055724	ATP6V0B/ATP6V0C/RNASEK/ATP6AP2/ATP6V0A4	5
GO:0016529	CC	GO:0016529	sarcoplasmic reticulum	13/1097	71/19594	0.0001384	0.00109122	0.00070227	HSP90B1/CALR/TMEM38B/THBS1/ITPR1/SYNE2/ITPR2/ATP2A2/ANK3/ASPH/AGL/CALU/MANF	13
GO:0031253	CC	GO:0031253	cell projection membrane	36/1097	339/19594	0.00017637	0.00137304	0.00088363	UMOD/SCNN1A/CTNNB1/INSR/PROM2/ITGB1/SPTBN1/CLCN3/SYNE2/PKD2/SLC3A1/CA4/ATP6AP2/ATP2B1/FOLR1/SLC39A6/NCKAP1/ITGAV/SHANK2/ATP1B2/MYO6/UTRN/MACF1/DIAPH1/C2CD5/HIP1R/ATP6V0A4/SLC7A8/B4GALT1/CUBN/EPS8L2/EZR/EPB41L3/EPB41L5/WWC1/CASK	36
GO:0005790	CC	GO:0005790	smooth endoplasmic reticulum	8/1097	30/19594	0.00018223	0.0014009	0.00090156	APP/CANX/CALR/PPIB/HSPA5/HYOU1/DNAJC3/PGRMC1	8
GO:0005796	CC	GO:0005796	Golgi lumen	16/1097	104/19594	0.00021128	0.00160419	0.00103239	UMOD/APP/MUC1/MUC15/SDC4/GOLIM4/GPC3/AGRN/GAS6/SDF4/DEFB1/LRPAP1/SDC1/SDC2/SOD3/PDGFA	16
GO:0045335	CC	GO:0045335	phagocytic vesicle	19/1097	138/19594	0.0002521	0.001869	0.00120281	ATP6V0B/ATP6V0C/CALR/CLCN3/LAMP1/ITGAV/FLNB/LAMP2/SEC22B/PDIA3/ATP6V0A4/ITGB5/HLA-C/KIF5B/HLA-E/HLA-A/STXBP4/CDC42/HLA-B	19
GO:0030867	CC	GO:0030867	rough endoplasmic reticulum membrane	7/1097	24/19594	0.00025224	0.001869	0.00120281	PLOD2/RPS28/ARL6IP1/CCDC47/SSR4/UBA1/SEC63	7
GO:0055038	CC	GO:0055038	recycling endosome membrane	15/1097	96/19594	0.00027721	0.00202959	0.00130616	SORL1/CMTM6/RAP2C/SCAMP1/PDIA3/ZDHHC2/ATP13A3/HLA-C/HLA-E/ABHD17C/HLA-A/NDRG1/PLEKHB2/HLA-B/RAB11FIP3	15
GO:0030140	CC	GO:0030140	trans-Golgi network transport vesicle	8/1097	32/19594	0.00029638	0.00214439	0.00138004	TGOLN2/TMED10/CLTC/IGF2R/SORT1/AP1G1/AFTPH/TMED9	8
GO:0005890	CC	GO:0005890	sodium:potassium-exchanging ATPase complex	5/1097	12/19594	0.00031003	0.00219157	0.00141041	ATP1A1/ATP1B1/ATP1B2/FXYD2/ATP1B3	5
GO:0033179	CC	GO:0033179	proton-transporting V-type ATPase, V0 domain	5/1097	12/19594	0.00031003	0.00219157	0.00141041	ATP6V0B/ATP6V0C/RNASEK/ATP6AP2/ATP6V0A4	5
GO:0030131	CC	GO:0030131	clathrin adaptor complex	6/1097	18/19594	0.00031485	0.00220038	0.00141608	SGIP1/AP1G1/AFTPH/AP3B1/AP2B1/AP2A2	6
GO:0070820	CC	GO:0070820	tertiary granule	21/1097	164/19594	0.00033852	0.00233918	0.0015054	ATP6V0C/CTSD/CST3/PLAU/METTL7A/CD59/CD47/LAMP1/PRCP/ATP6AP2/RAP2C/LAMP2/DSP/ADAM10/DIAPH1/SPTAN1/TSPAN14/TMEM179B/ASAH1/ANO6/AP2A2	21
GO:0031965	CC	GO:0031965	nuclear membrane	32/1097	300/19594	0.00036457	0.00246988	0.00158952	TMX4/TMEM38B/HACD3/ITPR1/SYNE2/MTDH/ZMPSTE24/RANBP2/XPO1/WTAP/PLCB1/TNRC18/OSBPL3/HPN/SORT1/CLMN/MYO6/GNAQ/PCM1/ERBIN/SUN1/RNF13/LBR/PUM2/UNC50/TRA2B/SYNE1/LRPPRC/SPIN1/NUP58/ANKRD17/DNAJB14	32
GO:0032432	CC	GO:0032432	actin filament bundle	13/1097	78/19594	0.00036546	0.00246988	0.00158952	ACTN4/MYLK/PLS3/FLNB/DAAM1/LIMCH1/FLNA/MYH10/ABLIM1/LPP/SEPTIN11/MYH9/DCTN4	13
GO:0030665	CC	GO:0030665	clathrin-coated vesicle membrane	16/1097	111/19594	0.00045015	0.00300916	0.00193658	EGF/CD9/TGOLN2/CLTC/IGF2R/SGIP1/MYO6/AP1G1/HIP1/AFTPH/HIP1R/SCARB2/M6PR/AP3B1/AP2B1/AP2A2	16
GO:0031010	CC	GO:0031010	ISWI-type complex	5/1097	13/19594	0.00048062	0.00317828	0.00204541	RBBP4/BPTF/RSF1/SMARCA1/SMARCA5	5
GO:0035579	CC	GO:0035579	specific granule membrane	14/1097	91/19594	0.00051486	0.00336851	0.00216784	PLAU/CD59/CD47/CMTM6/TMEM30A/SLC44A2/ITGAV/SCAMP1/ADAM10/PGRMC1/TSPAN14/ANO6/MLEC/AGPAT2	14
GO:1904813	CC	GO:1904813	ficolin-1-rich granule lumen	17/1097	124/19594	0.00054922	0.00354076	0.00227869	CTSD/CST3/HSPA1B/FGL2/GNS/JUP/HUWE1/GLB1/VCL/AGL/ASAH1/MAPK1/CAND1/CTSB/PFKL/DDX3X/HSPA1A	17
GO:0005681	CC	GO:0005681	spliceosomal complex	23/1097	194/19594	0.00055389	0.00354076	0.00227869	HNRNPH1/IVNS1ABP/RNPC3/TRA2A/LUC7L3/SF1/MYEF2/HNRNPU/TRA2B/RBM5/DHX15/SF3B1/SNRNP70/SREK1/PRPF4B/PTBP2/SRRM2/PRPF8/ADAR/WAC/SYNCRIP/PNN/LUC7L2	23
GO:0033176	CC	GO:0033176	proton-transporting V-type ATPase complex	7/1097	27/19594	0.00055846	0.00354076	0.00227869	ATP6V0B/ATP6V0C/RNASEK/ATP6V1A/ATP6AP1/ATP6AP2/ATP6V0A4	7
GO:0031904	CC	GO:0031904	endosome lumen	8/1097	35/19594	0.00057113	0.00358414	0.00230661	APP/LNPEP/PRLR/CTSL/CD63/LGMN/LRPAP1/CTSB	8
GO:0005801	CC	GO:0005801	cis-Golgi network	12/1097	72/19594	0.00060815	0.0037779	0.00243131	GOLIM4/AKAP9/ATP2C1/TMED10/GOLGA8B/GOLGA8A/MAN2A1/GOLGB1/LRPAP1/TRIP11/KDELR2/B3GAT3	12
GO:0042581	CC	GO:0042581	specific granule	20/1097	160/19594	0.00063398	0.00387719	0.00249521	CTSD/PLAU/CD59/CLCN3/CD47/CMTM6/TMEM30A/SLC44A2/ITGAV/SCAMP1/ADAM10/SPTAN1/JUP/VCL/PGRMC1/TSPAN14/ANO6/NEU1/MLEC/AGPAT2	20
GO:0055037	CC	GO:0055037	recycling endosome	23/1097	196/19594	0.00063979	0.00387719	0.00249521	APP/ITGB1/CLCN3/SORL1/CMTM6/RAP2C/SCAMP1/AP1G1/NISCH/ANK2/ARFGEF2/AMOTL2/PDIA3/ZDHHC2/ATP13A3/HLA-C/HLA-E/ABHD17C/HLA-A/NDRG1/PLEKHB2/HLA-B/RAB11FIP3	23
GO:0005912	CC	GO:0005912	adherens junction	21/1097	172/19594	0.00064305	0.00387719	0.00249521	CTNNB1/VEGFA/JAG1/CDH1/CTNND1/PKP4/CXADR/ADAM10/JUP/VCL/MAGI1/KLHL24/AFDN/EZR/TJP1/MYH9/ABI2/KIFC3/EPB41L5/NDRG1/RDX	21
GO:0042588	CC	GO:0042588	zymogen granule	5/1097	14/19594	0.00071328	0.00425143	0.00273605	GP2/TMED2/DNASE1/TMED10/SCAMP1	5
GO:0032580	CC	GO:0032580	Golgi cisterna membrane	14/1097	94/19594	0.00071894	0.00425143	0.00273605	GOLIM4/TMED2/ATP2C1/GOLGA8B/GOLGA8A/BCAP31/UXS1/SORT1/GOLPH3/ZDHHC14/B4GALT1/SAR1B/ASAP2/RAB21	14
GO:0098857	CC	GO:0098857	membrane microdomain	33/1097	327/19594	0.00079327	0.00462042	0.00297352	ATP1A1/ATP1B1/APP/CTSD/BSG/CTNNB1/SDC4/GP2/INSR/PROM2/ITGB1/MAL/PRKAR1A/CDH1/LRP6/ADGRG1/IL6ST/ATP2B1/LAMP2/AHNAK/CXADR/IGF1R/ERLIN2/ANK2/BST2/MAPK1/PPT1/EZR/PRKAR2A/BIRC2/TFPI/MAL2/RHOQ	33
GO:0042827	CC	GO:0042827	platelet dense granule	6/1097	21/19594	0.00079636	0.00462042	0.00297352	ITPR1/LGALS3BP/LAMP2/CD63/FAM3C/RARRES2	6
GO:0031256	CC	GO:0031256	leading edge membrane	21/1097	175/19594	0.00080712	0.00463904	0.0029855	INSR/ITGB1/SPTBN1/CLCN3/SYNE2/ATP6AP2/ATP2B1/SLC39A6/NCKAP1/ITGAV/MYO6/MACF1/DIAPH1/C2CD5/HIP1R/EPS8L2/EZR/EPB41L3/EPB41L5/WWC1/CDC42	21
GO:0032154	CC	GO:0032154	cleavage furrow	10/1097	55/19594	0.00084811	0.00482954	0.0031081	ITGB1/MYLK/PKN2/MYH10/MYH9/RAB21/RDX/RHOB/SEPTIN6/RAB11FIP3	10
GO:0005844	CC	GO:0005844	polysome	11/1097	65/19594	0.0008897	0.00501985	0.00323057	CALR/RPS4Y1/RPS28/MSI2/FMR1/RPS21/MYH10/RPL39/NUFIP2/EIF4G1/LARP1	11
GO:0070603	CC	GO:0070603	SWI/SNF superfamily-type complex	13/1097	86/19594	0.00095435	0.00533567	0.00343382	ARID1B/RBBP4/ARID1A/SMARCA2/BPTF/ARID2/SMARCC2/SF3B1/RSF1/SMARCA1/SMARCA4/CHD4/SMARCA5	13
GO:0017053	CC	GO:0017053	transcription repressor complex	12/1097	76/19594	0.00100005	0.00554084	0.00356586	CTNNB1/N4BP2L2/MDM4/TBL1XR1/JUN/CTBP1/SP1/NCOR1/RBBP8/SP3/JUND/REST	12
GO:0071565	CC	GO:0071565	nBAF complex	5/1097	15/19594	0.00102085	0.00560557	0.00360752	ARID1B/ARID1A/SMARCA2/SMARCC2/SMARCA4	5
GO:0030137	CC	GO:0030137	COPI-coated vesicle	6/1097	22/19594	0.00104357	0.00567959	0.00365515	TMED2/TMED7/TMED10/COPA/KDELR2/COPG1	6
GO:0030119	CC	GO:0030119	AP-type membrane coat adaptor complex	7/1097	30/19594	0.00110521	0.00591047	0.00380374	SGIP1/AP1G1/AFTPH/AP3B1/AP5M1/AP2B1/AP2A2	7
GO:0032839	CC	GO:0032839	dendrite cytoplasm	7/1097	30/19594	0.00110521	0.00591047	0.00380374	CANX/SFPQ/HNRNPU/PURA/HIP1R/KIF5B/UHMK1	7
GO:0042641	CC	GO:0042641	actomyosin	12/1097	77/19594	0.00112547	0.00596692	0.00384007	ACTN4/MYLK/FLNB/DAAM1/LIMCH1/MYH10/ABLIM1/LPP/SEPTIN11/MYH9/PDCD6IP/DCTN4	12
GO:1904949	CC	GO:1904949	ATPase complex	13/1097	88/19594	0.00118754	0.00624222	0.00401724	ARID1B/RBBP4/ARID1A/SMARCA2/BPTF/ARID2/SMARCC2/SF3B1/RSF1/SMARCA1/SMARCA4/CHD4/SMARCA5	13
GO:0030118	CC	GO:0030118	clathrin coat	8/1097	39/19594	0.00122395	0.00637907	0.00410532	CLTC/IGF2R/SGIP1/AP1G1/AFTPH/AP3B1/AP2B1/AP2A2	8
GO:0030666	CC	GO:0030666	endocytic vesicle membrane	22/1097	194/19594	0.00130465	0.00674254	0.00433923	EGF/CD9/ATP6V0B/ATP6V0C/CALR/WLS/TGOLN2/CLTC/LAMP1/IGF2R/SGIP1/LAMP2/SEC22B/ATP6V0A4/SCARB2/HLA-C/M6PR/HLA-E/HLA-A/AP2B1/AP2A2/HLA-B	22
GO:0008305	CC	GO:0008305	integrin complex	7/1097	31/19594	0.00135941	0.006967	0.00448368	ITGB1/ITGA6/ITGAV/ITGA2/ITGB6/ITGB5/ITGB8	7
GO:0043034	CC	GO:0043034	costamere	5/1097	16/19594	0.00141687	0.00720145	0.00463456	SDC4/ANK3/AHNAK/ANK2/VCL	5
GO:0001725	CC	GO:0001725	stress fiber	11/1097	69/19594	0.00147865	0.00738954	0.00475561	ACTN4/MYLK/FLNB/DAAM1/LIMCH1/MYH10/ABLIM1/LPP/SEPTIN11/MYH9/DCTN4	11
GO:0097517	CC	GO:0097517	contractile actin filament bundle	11/1097	69/19594	0.00147865	0.00738954	0.00475561	ACTN4/MYLK/FLNB/DAAM1/LIMCH1/MYH10/ABLIM1/LPP/SEPTIN11/MYH9/DCTN4	11
GO:0045121	CC	GO:0045121	membrane raft	32/1097	326/19594	0.00148992	0.00738954	0.00475561	ATP1A1/ATP1B1/APP/CTSD/BSG/CTNNB1/SDC4/GP2/INSR/PROM2/ITGB1/MAL/PRKAR1A/CDH1/LRP6/ADGRG1/IL6ST/ATP2B1/AHNAK/CXADR/IGF1R/ERLIN2/ANK2/BST2/MAPK1/PPT1/EZR/PRKAR2A/BIRC2/TFPI/MAL2/RHOQ	32
GO:0005916	CC	GO:0005916	fascia adherens	4/1097	10/19594	0.00156283	0.00758028	0.00487836	CTNNB1/DSP/JUP/VCL	4
GO:0097197	CC	GO:0097197	tetraspanin-enriched microdomain	4/1097	10/19594	0.00156283	0.00758028	0.00487836	CD81/TSPAN9/ADAM10/TSPAN14	4
GO:0031901	CC	GO:0031901	early endosome membrane	20/1097	172/19594	0.00156536	0.00758028	0.00487836	WLS/CLCN3/NTRK2/SORL1/CMTM6/GPNMB/LRP6/TMEM30A/MON2/TMEM165/ATP13A3/SNX13/HLA-C/ZFYVE16/HLA-E/TMEM9B/HLA-A/RAB21/GGA2/HLA-B	20
GO:0005903	CC	GO:0005903	brush border	14/1097	102/19594	0.00162114	0.00774702	0.00498567	SCIN/SLC3A1/CA4/FOLR1/SHANK2/FLNB/SLC38A2/FLNA/ATP6V0A4/ADD3/B4GALT1/CUBN/EZR/MYH9	14
GO:0031091	CC	GO:0031091	platelet alpha granule	13/1097	91/19594	0.00162499	0.00774702	0.00498567	APLP2/EGF/APP/CD9/KNG1/THBS1/VEGFA/ACTN4/SERPINA5/SERPING1/GAS6/TEX264/PDGFA	13
GO:0015629	CC	GO:0015629	actin cytoskeleton	44/1097	499/19594	0.00197769	0.00933211	0.00600577	CGNL1/SPTBN1/SCIN/ACTN4/MYLK/PLS3/IQGAP1/CDH1/NCKAP1/FLNB/PLEKHH2/MYO6/UTRN/AHNAK/MACF1/DIAPH1/DAAM1/MYO9A/LIMCH1/SPTAN1/FLNA/JUP/VCL/MYH10/ABLIM1/CARMIL1/LPP/INTS6/DAPK1/MPRIP/EZR/TJP1/ARHGAP35/SEPTIN11/ARHGAP6/MYH9/PDCD6IP/LLGL2/PAWR/DCTN4/RDX/WDR1/CASK/RHOQ	44
GO:0070971	CC	GO:0070971	endoplasmic reticulum exit site	7/1097	33/19594	0.00200299	0.00933211	0.00600577	MIA2/SAR1A/SAR1B/PDCD6IP/HLA-A/SEC31A/YIPF5	7
GO:0097386	CC	GO:0097386	glial cell projection	7/1097	33/19594	0.00200299	0.00933211	0.00600577	APP/ITGB1/ADGRG1/KCNJ10/ATP1B2/TMEM50A/FMR1	7
GO:0062023	CC	GO:0062023	collagen-containing extracellular matrix	39/1097	429/19594	0.00203019	0.0093877	0.00604155	SFRP1/HSP90B1/KNG1/CTSD/CALR/CXCL12/PSAP/IGFBP7/LMAN1/COL18A1/COL6A1/THBS1/GPC3/COL4A3/SERPINA5/COL4A4/DST/AGRN/LGALS3BP/SERPING1/COL4A2/FGL2/NTN4/CTSC/LAMA5/LAMB1/CTSL/ERBIN/GDF15/CTSF/NAV2/LTBP3/SDC2/COL4A1/CTSB/CD151/RARRES2/SOD3/CASK	39
GO:0016471	CC	GO:0016471	vacuolar proton-transporting V-type ATPase complex	6/1097	25/19594	0.00214482	0.00977086	0.00628814	ATP6V0B/ATP6V0C/RNASEK/ATP6V1A/ATP6AP2/ATP6V0A4	6
GO:0030125	CC	GO:0030125	clathrin vesicle coat	6/1097	25/19594	0.00214482	0.00977086	0.00628814	CLTC/SGIP1/AP1G1/AFTPH/AP2B1/AP2A2	6
GO:0031094	CC	GO:0031094	platelet dense tubular network	4/1097	11/19594	0.00234754	0.0101778	0.00655005	ITPR1/ITPR2/SERPINA5/ATP2A2	4
GO:0034992	CC	GO:0034992	microtubule organizing center attachment site	4/1097	11/19594	0.00234754	0.0101778	0.00655005	SYNE2/CLMN/SUN1/SYNE1	4
GO:0034993	CC	GO:0034993	meiotic nuclear membrane microtubule tethering complex	4/1097	11/19594	0.00234754	0.0101778	0.00655005	SYNE2/CLMN/SUN1/SYNE1	4
GO:0042589	CC	GO:0042589	zymogen granule membrane	4/1097	11/19594	0.00234754	0.0101778	0.00655005	GP2/TMED2/TMED10/SCAMP1	4
GO:0106083	CC	GO:0106083	nuclear membrane protein complex	4/1097	11/19594	0.00234754	0.0101778	0.00655005	SYNE2/CLMN/SUN1/SYNE1	4
GO:0106094	CC	GO:0106094	nuclear membrane microtubule tethering complex	4/1097	11/19594	0.00234754	0.0101778	0.00655005	SYNE2/CLMN/SUN1/SYNE1	4
GO:0032153	CC	GO:0032153	cell division site	11/1097	73/19594	0.00235423	0.0101778	0.00655005	ITGB1/MYLK/PKN2/MYH10/SEPTIN11/MYH9/RAB21/RDX/RHOB/SEPTIN6/RAB11FIP3	11
GO:0098636	CC	GO:0098636	protein complex involved in cell adhesion	8/1097	43/19594	0.00236655	0.0101778	0.00655005	PLAU/ITGB1/ITGA6/ITGAV/ITGA2/ITGB6/ITGB5/ITGB8	8
GO:0005604	CC	GO:0005604	basement membrane	13/1097	95/19594	0.00240802	0.0102843	0.00661855	COL18A1/COL4A3/COL4A4/DST/AGRN/COL4A2/NTN4/LAMA5/LAMB1/ERBIN/COL4A1/CD151/CASK	13
GO:0005771	CC	GO:0005771	multivesicular body	10/1097	63/19594	0.00247388	0.0104926	0.00675265	SORL1/PRKAR1A/LAMP1/NEDD4L/CTSL/TMEM9/CD63/BST2/LAPTM4B/NDFIP2	10
GO:0098858	CC	GO:0098858	actin-based cell projection	23/1097	217/19594	0.00250177	0.0105176	0.00676868	APP/CTNNB1/PROM2/ITGB1/ATP6V1A/SYNE2/ITGAV/OSBPL3/FAT1/MYO6/UTRN/CXADR/FMR1/KITLG/SLC7A8/B4GALT1/DYNC1H1/EPS8L2/EZR/ABI2/RDX/CDC42/PDGFA	23
GO:0030663	CC	GO:0030663	COPI-coated vesicle membrane	5/1097	18/19594	0.00253105	0.0105176	0.00676868	TMED2/TMED7/COPA/KDELR2/COPG1	5
GO:0090533	CC	GO:0090533	cation-transporting ATPase complex	5/1097	18/19594	0.00253105	0.0105176	0.00676868	ATP1A1/ATP1B1/ATP1B2/FXYD2/ATP1B3	5
GO:0016514	CC	GO:0016514	SWI/SNF complex	6/1097	26/19594	0.00265792	0.0109706	0.00706025	ARID1B/ARID1A/SMARCA2/ARID2/SMARCC2/SMARCA4	6
GO:0071564	CC	GO:0071564	npBAF complex	4/1097	12/19594	0.0033663	0.0138018	0.00888231	ARID1A/SMARCA2/SMARCC2/SMARCA4	4
GO:0030670	CC	GO:0030670	phagocytic vesicle membrane	11/1097	77/19594	0.00360882	0.0146982	0.00945915	ATP6V0B/ATP6V0C/CALR/LAMP1/LAMP2/SEC22B/ATP6V0A4/HLA-C/HLA-E/HLA-A/HLA-B	11
GO:0005811	CC	GO:0005811	lipid droplet	13/1097	100/19594	0.0037965	0.0153608	0.00988562	METTL7A/ACSL3/ACSL4/HSD11B2/BCAP31/VPS13A/SYNGR2/PLIN5/C18orf32/RAB3GAP1/CYB5R3/BSCL2/PNPLA2	13
GO:0031093	CC	GO:0031093	platelet alpha granule lumen	10/1097	67/19594	0.00392507	0.0156748	0.0100877	EGF/APP/KNG1/THBS1/VEGFA/ACTN4/SERPING1/GAS6/TEX264/PDGFA	10
GO:0031594	CC	GO:0031594	neuromuscular junction	10/1097	67/19594	0.00392507	0.0156748	0.0100877	APP/ITGB1/PRKAR1A/ANK3/LAMA5/UTRN/SYNGR2/SYNGR1/MYH9/TBC1D24	10
GO:0036019	CC	GO:0036019	endolysosome	6/1097	28/19594	0.00395289	0.0156841	0.0100936	CLTC/CTSL/LGMN/CTSB/AP2B1/AP2A2	6
GO:0031362	CC	GO:0031362	anchored component of external side of plasma membrane	5/1097	20/19594	0.00417224	0.0163435	0.010518	GP2/CD59/PKHD1/CA4/FOLR1	5
GO:0044233	CC	GO:0044233	mitochondria-associated endoplasmic reticulum membrane	5/1097	20/19594	0.00417224	0.0163435	0.010518	CANX/ACSL4/BCAP31/TMX2/AHCYL1	5
GO:0030864	CC	GO:0030864	cortical actin cytoskeleton	11/1097	79/19594	0.00441092	0.0171691	0.0110493	SPTBN1/ACTN4/IQGAP1/CDH1/PLEKHH2/UTRN/SPTAN1/MYH9/LLGL2/RDX/WDR1	11
GO:0044194	CC	GO:0044194	cytolytic granule	4/1097	13/19594	0.00464883	0.0179813	0.0115721	CALR/LAMP1/ARL8B/TIAL1	4
GO:0035578	CC	GO:0035578	azurophil granule lumen	12/1097	91/19594	0.00472614	0.0180533	0.0116184	NHLRC3/GNS/CTSC/IST1/DNAJC3/GLB1/CYB5R3/GRN/MAPK1/CTSA/DYNC1H1/DPP7	12
GO:0045334	CC	GO:0045334	clathrin-coated endocytic vesicle	12/1097	91/19594	0.00472614	0.0180533	0.0116184	EGF/CD9/LMBRD1/TGOLN2/CLTC/IGF2R/SGIP1/MYO6/SCARB2/M6PR/AP2B1/AP2A2	12
GO:1902911	CC	GO:1902911	protein kinase complex	14/1097	115/19594	0.00496601	0.0188524	0.0121327	INSR/PRKAR1A/PRKAA2/ACVR1B/IGF1R/PRKDC/CCNL1/PRKCI/CDK12/DAPK1/CCNL2/PRKAR2A/CCNG2/PRKAA1	14
GO:0005667	CC	GO:0005667	transcription regulator complex	41/1097	483/19594	0.00535005	0.0201858	0.0129908	FOS/CTNNB1/N4BP2L2/JUNB/MDM4/HIPK2/PBX1/RBBP4/IVNS1ABP/SFPQ/TEAD1/TBL1XR1/PRKDC/JUN/PBXIP1/CTBP1/YAP1/ATF7IP/ADNP/SMAD5/TLE5/NFAT5/MAF/TCF7L2/NFE2L1/SP1/CREBZF/HIF1A/NCOR1/RBBP8/SP3/STAT3/JUND/CHD4/SOX4/RBL2/REST/SMAD2/STAT1/MEF2A/ATF2	41
GO:0005905	CC	GO:0005905	clathrin-coated pit	10/1097	70/19594	0.00540081	0.020253	0.013034	APP/CLTC/SGIP1/SORT1/MYO6/LRP10/HIP1R/CUBN/AP2B1/AP2A2	10
GO:0099568	CC	GO:0099568	cytoplasmic region	25/1097	259/19594	0.0057354	0.0213774	0.0137576	CANX/CTNNB1/PRKAR1A/PKD2/CTNND1/DST/SFPQ/ARFGEF2/FMR1/WDR11/HNRNPU/PURA/HIP1R/CTBP1/PHLDB2/ARL8B/DYNC1H1/KIF5B/ARMCX3/PRKAR2A/UHMK1/HIF1A/OPA1/RAB21/AP3B1	25
GO:0030132	CC	GO:0030132	clathrin coat of coated pit	4/1097	14/19594	0.00622305	0.0230553	0.0148375	CLTC/SGIP1/AP2B1/AP2A2	4
GO:0005637	CC	GO:0005637	nuclear inner membrane	9/1097	61/19594	0.00656374	0.024028	0.0154634	TMX4/ITPR1/ZMPSTE24/SUN1/RNF13/LBR/UNC50/TRA2B/LRPPRC	9
GO:0101003	CC	GO:0101003	ficolin-1-rich granule membrane	9/1097	61/19594	0.00656374	0.024028	0.0154634	ATP6V0C/LAMP1/PRCP/ATP6AP2/LAMP2/DSP/DIAPH1/TMEM179B/AP2A2	9
GO:0030669	CC	GO:0030669	clathrin-coated endocytic vesicle membrane	10/1097	72/19594	0.0066038	0.0240316	0.0154658	EGF/CD9/TGOLN2/CLTC/IGF2R/SGIP1/SCARB2/M6PR/AP2B1/AP2A2	10
GO:0000421	CC	GO:0000421	autophagosome membrane	8/1097	51/19594	0.00700815	0.025353	0.0163162	LAMP1/TM9SF1/ATP6AP2/LAMP2/TEX264/VMP1/RPN2/PRKD1	8
GO:1904115	CC	GO:1904115	axon cytoplasm	9/1097	62/19594	0.00730665	0.0262783	0.0169117	DST/ARL8B/DYNC1H1/KIF5B/ARMCX3/HIF1A/OPA1/RAB21/AP3B1	9
GO:0032587	CC	GO:0032587	ruffle membrane	12/1097	97/19594	0.00787235	0.0280045	0.0180226	ITGB1/CLCN3/ITGAV/MYO6/MACF1/DIAPH1/C2CD5/HIP1R/EPS8L2/EZR/EPB41L5/WWC1	12
GO:0071782	CC	GO:0071782	endoplasmic reticulum tubular network	5/1097	23/19594	0.00787769	0.0280045	0.0180226	RTN4/ASPH/ATL2/RAB3GAP1/REEP5	5
GO:0030127	CC	GO:0030127	COPII vesicle coat	4/1097	15/19594	0.00811476	0.0286815	0.0184582	TMED7/SAR1A/SAR1B/SEC31A	4
GO:0031233	CC	GO:0031233	intrinsic component of external side of plasma membrane	5/1097	24/19594	0.00950073	0.0331986	0.0213653	GP2/CD59/PKHD1/CA4/FOLR1	5
GO:0098533	CC	GO:0098533	ATPase dependent transmembrane transport complex	5/1097	24/19594	0.00950073	0.0331986	0.0213653	ATP1A1/ATP1B1/ATP1B2/FXYD2/ATP1B3	5
GO:0090575	CC	GO:0090575	RNA polymerase II transcription regulator complex	22/1097	230/19594	0.0101278	0.0351899	0.0226468	FOS/CTNNB1/JUNB/HIPK2/PBX1/SFPQ/TEAD1/JUN/YAP1/ADNP/SMAD5/MAF/TCF7L2/NFE2L1/CREBZF/HIF1A/STAT3/JUND/CHD4/SMAD2/STAT1/ATF2	22
GO:0045239	CC	GO:0045239	tricarboxylic acid cycle enzyme complex	4/1097	16/19594	0.0103474	0.0357508	0.0230078	OGDHL/OGDH/BCKDHA/DLD	4
GO:0001726	CC	GO:0001726	ruffle	18/1097	177/19594	0.0105114	0.0360023	0.0231697	ITGB1/CLCN3/IQGAP1/NCKAP1/ITGAV/MYO6/MKLN1/MACF1/DIAPH1/TRPM7/CLIP1/C2CD5/HIP1R/EPS8L2/EZR/MYH9/EPB41L5/WWC1	18
GO:0001772	CC	GO:0001772	immunological synapse	7/1097	44/19594	0.0105373	0.0360023	0.0231697	CD81/NPTN/PRKAR1A/ATP2B1/EZR/MYH9/PDCD6IP	7
GO:0044322	CC	GO:0044322	endoplasmic reticulum quality control compartment	5/1097	25/19594	0.0113397	0.03853	0.0247964	CANX/CALR/AMFR/HERPUD1/ERLEC1	5
GO:0005769	CC	GO:0005769	early endosome	33/1097	389/19594	0.011699	0.0395323	0.0254414	APP/WLS/CLCN5/LNPEP/CLCN3/NTRK2/SORL1/ERBB2/CMTM6/ARRDC3/GPNMB/IGF2R/LRP6/TMEM30A/SORT1/MON2/NISCH/TMEM165/ANK2/RAP1GAP/ATP13A3/MAPK1/SNX13/HLA-C/LAPTM4B/ZFYVE16/HLA-E/TMEM9B/HLA-A/RAB21/GGA2/RHOB/HLA-B	33
GO:0098984	CC	GO:0098984	neuron to neuron synapse	30/1097	347/19594	0.0123081	0.0413633	0.0266198	ATP1A1/CPEB4/ERBB4/NPTN/CTNNB1/RTN4/AKAP9/SPTBN1/CADM1/ITPR1/NTRK2/PCBP2/CTNND1/MIB1/CLSTN1/SHANK2/PKP4/ATP1B2/ADAM10/EIF3A/ARFGEF2/FMR1/ZDHHC2/HIP1R/ADD3/PJA2/ABHD17C/MAL2/PDPK1/YWHAZ	30
GO:0000159	CC	GO:0000159	protein phosphatase type 2A complex	4/1097	17/19594	0.0129418	0.0427915	0.0275389	PPP2CB/PPP2R1A/PPP2R5E/PPP2R3A	4
GO:0071004	CC	GO:0071004	U2-type prespliceosome	4/1097	17/19594	0.0129418	0.0427915	0.0275389	LUC7L3/SF3B1/SNRNP70/LUC7L2	4
GO:0071010	CC	GO:0071010	prespliceosome	4/1097	17/19594	0.0129418	0.0427915	0.0275389	LUC7L3/SF3B1/SNRNP70/LUC7L2	4
GO:0031528	CC	GO:0031528	microvillus membrane	5/1097	26/19594	0.0134068	0.0438574	0.0282248	CTNNB1/PROM2/ITGAV/SLC7A8/EZR	5
GO:0033177	CC	GO:0033177	proton-transporting two-sector ATPase complex, proton-transporting domain	5/1097	26/19594	0.0134068	0.0438574	0.0282248	ATP6V0B/ATP6V0C/RNASEK/ATP6AP2/ATP6V0A4	5
GO:0042383	CC	GO:0042383	sarcolemma	14/1097	131/19594	0.0150503	0.0489733	0.0315173	ATP1A1/ATP1B1/BSG/COL6A1/ITGB1/LAMP1/ANK3/UTRN/AHNAK/IGF1R/ANK2/SLC38A2/VCL/RDX	14
GO:0003712	MF	GO:0003712	transcription coregulator activity	60/1079	497/18410	8.06e-08	4.32e-05	3.8e-05	MUC1/DDX17/CTNNB1/N4BP2L2/IRF2BP2/HIPK2/ARID1B/PPARGC1A/ACTN4/IRF2BPL/MTDH/NUCKS1/RAP2C/ARID1A/SMARCA2/SF1/KMT2C/TBL1XR1/TOB1/MED13/ZMIZ1/PBXIP1/RERE/JUP/HNRNPU/KDM5A/BCLAF1/MED13L/SMARCC2/BTG2/CTBP1/MYSM1/PIAS2/DYRK1A/YAP1/TRIP11/ATF7IP/JMJD1C/TLE5/KAT6B/ZNF451/RSF1/NRIP1/MAML2/MAGED1/JADE1/SMARCA4/BIRC2/NCOR1/FUS/AEBP2/RBBP8/UBE3A/PAWR/ATN1/LCOR/EWSR1/WWC1/USP22/HSPA1A	60
GO:0005178	MF	GO:0005178	integrin binding	28/1079	156/18410	1.03e-07	4.32e-05	3.8e-05	SPP1/CD9/CD81/CALR/CXCL12/ITGB1/THBS1/CASR/ACTN4/COL4A3/GPNMB/DST/ITGA6/TSPAN8/ITGAV/ITGA2/LAMA5/LAMB1/UTRN/CXADR/ITGB6/ADAM10/NISCH/ITGB5/P4HB/CD151/ITGB8/MYH9	28
GO:0045296	MF	GO:0045296	cadherin binding	45/1079	333/18410	1.42e-07	4.32e-05	3.8e-05	BSG/ARGLU1/CD46/CTNNB1/RTN4/KTN1/ITGB1/SPTBN1/IQGAP1/CDH1/CTNND1/ANK3/COBLL1/ITGA6/HSPA5/FLNB/PKP4/PKN2/SLK/PCBP1/EPCAM/AHNAK/MACF1/SPTAN1/FLNA/JUP/IST1/VCL/PHLDB2/AFDN/KIF5B/MPRIP/EPS8L2/EZR/TJP1/SH3GLB2/SLC3A2/MYH9/LARP1/NDRG1/RDX/DDX3X/STAT1/YWHAZ/HSPA1A	45
GO:0070008	MF	GO:0070008	serine-type exopeptidase activity	6/1079	10/18410	6.85e-06	0.00150864	0.00132802	CPD/PRCP/HPN/SCPEP1/CPVL/CTSA	6
GO:0046332	MF	GO:0046332	SMAD binding	16/1079	78/18410	9.54e-06	0.00150864	0.00132802	FOS/CTNNB1/HIPK2/ACVR1B/TOB1/ZMIZ1/JUN/PURA/SMAD5/USP9X/TRIM33/PURB/IPO7/PPM1A/SMAD2/MEF2A	16
GO:0035925	MF	GO:0035925	mRNA 3'-UTR AU-rich region binding	9/1079	26/18410	9.95e-06	0.00150864	0.00132802	ZFP36L1/CPEB2/ZFP36/TIA1/NUDT21/ELAVL1/TIAL1/ILF3/ZFP36L2	9
GO:0019838	MF	GO:0019838	growth factor binding	22/1079	139/18410	1.91e-05	0.00248319	0.00218589	CRIM1/IGFBP7/COL6A1/INSR/THBS1/IGFBP2/NTRK2/LIFR/FGFR3/ERBB2/IGF2R/IL6ST/GLG1/ITGA6/ITGAV/ACVR1B/SORT1/IGF1R/LTBP3/COL4A1/KL/PDGFA	22
GO:0140297	MF	GO:0140297	DNA-binding transcription factor binding	50/1079	470/18410	3.32e-05	0.00349047	0.00307258	FOS/CALR/CTNNB1/HIPK2/PPARGC1A/PBX1/ACTN4/PROX1/MTDH/NUCKS1/BHLHE40/ARID1A/PRKDC/MED13/FOXP1/JUN/PBXIP1/FLNA/PURA/NFIA/CTBP1/PIAS2/YAP1/GTF2I/JMJD1C/TCF7L2/KAT6B/TRIP12/NRIP1/NAAA/MEF2C/SP1/HIF1A/PURB/SMARCA1/SMARCA4/NCOR1/RBBP8/SP3/LCOR/STAT3/JUND/CHD4/REST/SMAD2/STAT1/MEF2A/ATF2/YWHAZ/DDRGK1	50
GO:0061629	MF	GO:0061629	RNA polymerase II-specific DNA-binding transcription factor binding	40/1079	348/18410	3.64e-05	0.00349047	0.00307258	FOS/CALR/CTNNB1/HIPK2/PPARGC1A/ACTN4/PROX1/MTDH/BHLHE40/ARID1A/PRKDC/MED13/FOXP1/JUN/CTBP1/PIAS2/GTF2I/JMJD1C/TCF7L2/KAT6B/TRIP12/NRIP1/MEF2C/SP1/HIF1A/SMARCA1/SMARCA4/NCOR1/RBBP8/SP3/LCOR/STAT3/JUND/CHD4/REST/SMAD2/STAT1/MEF2A/ATF2/DDRGK1	40
GO:0003713	MF	GO:0003713	transcription coactivator activity	33/1079	266/18410	3.84e-05	0.00349047	0.00307258	DDX17/CTNNB1/HIPK2/ARID1B/PPARGC1A/ACTN4/MTDH/NUCKS1/RAP2C/ARID1A/SMARCA2/KMT2C/MED13/ZMIZ1/PBXIP1/RERE/JUP/KDM5A/SMARCC2/MYSM1/DYRK1A/YAP1/TRIP11/NRIP1/MAML2/MAGED1/JADE1/SMARCA4/BIRC2/FUS/UBE3A/WWC1/USP22	33
GO:0060090	MF	GO:0060090	molecular adaptor activity	42/1079	379/18410	5.52e-05	0.00453922	0.00399577	ATP1B1/SERINC1/LMBRD1/AKAP9/LPL/SYNE2/OBSL1/AMFR/IQGAP1/ANK3/SHANK2/GAS6/ATP1B2/FXYD2/AP1G1/HIP1/ANK2/SUN1/SEC22B/JUP/STX16/HIP1R/MAGI1/SYNE1/DDB1/CUL4A/HERPUD1/EPB41L3/ATP1B3/EIF4G1/SEPTIN11/DCAF7/MYH9/ABI2/STAT3/CUL5/WWC1/SPAG9/WWC2/AP2B1/AP2A2/SEPTIN6	42
GO:0043495	MF	GO:0043495	protein-membrane adaptor activity	8/1079	25/18410	5.99e-05	0.00453922	0.00399577	LMBRD1/LPL/SYNE2/SUN1/JUP/SYNE1/EPB41L3/MYH9	8
GO:0031267	MF	GO:0031267	small GTPase binding	32/1079	267/18410	9.72e-05	0.00680111	0.00598687	CYFIP2/SORL1/CDC42SE1/IQGAP1/ATP6AP1/RANBP2/XPO1/NCKAP1/PKN2/AP1G1/DIAPH1/DAAM1/RAP1GAP/FLNA/RHOBTB3/GOLGA4/RAB3GAP1/AFDN/TRIP11/DENND1B/DOCK1/USP33/RIN2/TNPO1/GCC2/ABI2/IPO7/BICDL1/STRN3/NDRG1/GGA2/RAB11FIP3	32
GO:0030674	MF	GO:0030674	protein-macromolecule adaptor activity	35/1079	305/18410	0.00011293	0.00712229	0.00626959	ATP1B1/SERINC1/LMBRD1/LPL/SYNE2/OBSL1/AMFR/IQGAP1/ANK3/SHANK2/GAS6/ATP1B2/FXYD2/AP1G1/HIP1/ANK2/SUN1/SEC22B/JUP/STX16/HIP1R/SYNE1/DDB1/CUL4A/HERPUD1/EPB41L3/ATP1B3/DCAF7/MYH9/ABI2/STAT3/CUL5/SPAG9/AP2B1/AP2A2	35
[truncated: 32 more rows]

## Sheet: PC
	ONTOLOGY	ID	Description	GeneRatio	BgRatio	pvalue	p.adjust	qvalue	geneID	Count
[truncated: 478 more rows]

[truncated: 4 more sheets: IC, Myeloid, NKT, BC]
